# Supplementary material for: Edgetic perturbation signatures represent known and novel cancer biomarkers
Source: Sci Rep. 2020 Mar 9;10:4350. doi: 10.1038/s41598-020-61422-3 (PMC7062722; doi:10.1038/s41598-020-61422-3)
Supplement: Supplementary file 2 — Table S1. [file 41598_2020_61422_MOESM2_ESM.xlsx]

## Sheet: Supplementary Table I
S1 Table: An isoform switch coupled with domain changes in any of the interacting proteins results to edgetic perturbations.
CancerType	Total number of edgetic gains	Set 1 edgetic gains	Set 2 edgetic gains	Total number of edgetic losses	Set 1 edgetic losses	Set 2 edgetic losses
BLCA	30	28	2	1	1	0
BRCA	15	10	5	2	2	0
COAD	2	2	0	12	11	1
HNSC	1	1	0	15	12	3
KICH	4	2	2	1	1	0
KIRC	2	2	0	10	8	2
KIRP	39	38	1	10	6	4
LIHC	21	14	7	48	38	10
LUAD	43	35	8	84	77	7
LUSC	27	22	5	48	41	7
PRAD	6	6	0	26	19	7
STES	45	36	9	10	10	0
THCA	9	7	2	9	8	1
	Total number of edgetic gains / edgetic losses: The number of perturbed edges (due to isoform switches) interacting with the prominent protein involved in the most perturbations across patients of a cancer type
	Set 1 edgetic gains: The subset of edgetic gain perturbations due to an isoform switch in one of the interacting protein pairs
	Set 2 edgetic gains: The subset of edgetic gain perturbations due to an isoform switches in both interacting proteins
	Set 1 edgetic losses: The subset of edgetic loss perturbations due to an isoform switch in one of the interacting protein pairs
	Set 2 edgetic losses: The subset of edgetic loss perturbations due to isoform switches in both interacting proteins
