# Supplementary material for: Edgetic perturbation signatures represent known and novel cancer biomarkers
Source: Sci Rep. 2020 Mar 9;10:4350. doi: 10.1038/s41598-020-61422-3 (PMC7062722; doi:10.1038/s41598-020-61422-3)
Supplement: Supplementary file 3 — Table S2. [file 41598_2020_61422_MOESM3_ESM.xlsx]

## Sheet: Supplementary Table II
Supplementary Table II: The identified edgetic perturbations are retained in the protein-abundance filtered PPIN									i
Cancer type	Total number of perturbed edges using global PPIN	Total number of perturbed edges using protein abundance filtered PPIN	Protein whose interactions are significantly gained across all patients	Number of gained edges observed using global PPIN	Number of gained edges observed using protein abundance filtered PPIN	Protein whose interactions are significantly lost across all patients	Number of lost edges observed using global PPIN	Number of lost edges observed using protein abundance filtered PPIN
BRCA	33485	32829	CDC25C	31	31	NOS2	134	134
BLCA	29867	29284	HIST2H2AC	77	77	ACTA1	95	94
KICH	30497	29860	HRK	6	6	VTN	69	68
KIRC	37773	37081	CDKN2A	124	122	ESRRB	82	82
KIRP	34034	33368	IGF2BP3	72	71	NROB2	47	45
LUAD	27778	27220	ABCC2	38	37	APOA1	57	55
LUSC	28641	28048	HIST1H2AE	50	50	USHBP1	93	92
LIHC	59886	26568	EBF2, ZNF23	1	1	AMHR2	2	2
PRAD	27112	26568	CENPA	61	61	CACNA1A	75	75
THCA	33936	33211	ALK	52	52	VEGFD	8	8
STES	31830	31186	TNFSF11	21	21	HSPA1L	115	113
COAD	24398	23844	KLC3	57	57	RPL10A	98	97
HNSC	36343	35620	FOXL2	56	56	PCK1	68	68
