# Supplementary material for: Edgetic perturbation signatures represent known and novel cancer biomarkers
Source: Sci Rep. 2020 Mar 9;10:4350. doi: 10.1038/s41598-020-61422-3 (PMC7062722; doi:10.1038/s41598-020-61422-3)
Supplement: Supplementary file 4 — Table S3. [file 41598_2020_61422_MOESM4_ESM.xlsx]

## Sheet: Supplementary Table III
Supplementary Table IIIa: Specific cancer SMGs are involved in edgetic perturbations of cancer PPINs.
Cancer type	Cancer type SMGs	Gained edges	Number of edges gained as 1st neighbours of SMGs	Number of edges gained as 1st or 2nd neighbours of SMGs	SMG protein products involved in edgetic gains	% of gains linked to SMGs	Lost edges	Number of edges lost as 1st neighbours of SMGs	Number of edges lost as 1st or 2nd neighbours of SMGs	SMG protein products involved in edgetic losses	% of losses linked to SMGs
THCA	35(36)	22831	254	7741	32	33.9	28065	334	9788	32	34.8
BLCA	52(54)	20739	759	11046	47	53.26	19030	626	9695	42	50.94
BRCA	49(52)	22195	638	11627	47	52.4	25516	553	12385	46	48.5
COAD	82(87)	10065	449	5966	54	59.27	21024	679	10533	60	50.1
KIRC	24(26)	18258	215	7001	24	38.34	33005	380	14418	25	43.7
KIRP	18(21)	17174	154	5402	19	31.5	27141	233	9048	20	33.33
KICH	16(18)	12423	102	3409	17	27.4	27490	246	9337	17	34
HNSC	50(52)	21913	626	11439	46	52.2	27485	817	13947	44	50.7
LUAD	52(58)	16622	480	9109	39	54.8	21907	608	11819	46	54
PRAD	39(40)	17529	261	8173	28	46.63	22468	320	9060	30	40.32
LUSC	34(35)	13108	426	5295	26	40.39	23242	430	10307	28	44.35
STES	24(27)	24326	160	4685	20	19.26	20800	182	3827	20	18.4
LIHC	41(49)	36458	1293	22998	44	63.1	51445	2161	32554	46	63.27
The numbers in the brackets next to the Cancer type SMGs indicate the protein products of the SMGs.
Supplementary Table IIIb: The proportions of edgetic perturbations associated with SMGs and those associated with random genes with a similar degree significantly differ in size.
Cancer type	Number of edges gained as 1st neighbours of SMGs	Number of edges gained as 1st neighbours of random genes		Number of edges gained as 1st or 2nd neighbours of SMGs	Number of edges gained as 1st or 2nd neighbours of random genes		Number of edges lost as 1st neighbours of SMGs	Number of edges lost as 1st neighbours of random genes		Number of edges lost as 1st or 2nd neighbours of SMGs	Number of edges lost as 1st or 2nd neighbours of random SMGs
			A			B			C			D
THCA	254	461	6.06e-15	7741	7282	5.84e-07	334	609	1.69e-19	9788	11057	1.47e-28
BLCA	759	662	0.009	11046	10818	0.02	626	851	2.35e-09	9695	10191	3.58e-07
BRCA	638	935	2.44e-14	11627	12997	4.09e-39	553	927	5.86e-23	12385	13776	7.16e-35
COAD	449	406	0.1	5966	5345	1.13e-18	679	805	0.0008	10533	11817	4.06e-36
KIRC	215	477	8.69e-24	7001	8001	2.01e-26	380	452	0.012	14418	12681	5.58e-43
KIRP	154	341	2.53e-17	5402	4567	3.19e-23	233	354	5.12e-07	9048	9168	0.27
KICH	102	89	0.34	3409	2799	3.93e-19	246	187	0.004	9337	7824	4.43e-44
HNSC	626	693	0.06	11439	11589	0.15	817	814	0.9	13947	13941	0.9
LUAD	480	431	0.09	9109	8375	7.49e-16	608	450	1.18e-06	11819	11082	1.12e-06
PRAD	261	247	0.53	8173	7109	2.1e-30	320	467	1.25e-05	9060	9265	0.05
LUSC	426	261	1.78e-10	5295	5127	0.03	430	470	0.17	10307	10132	0.1
STES	160	166	0.74	4685	5067	1.51e-05	182	200	0.35	3827	4868	3.85e-36
LIHC	1293	1508	3.43e-05	22998	23235	0.06	2161	1705	7.68e-14	32554	30974	3.86e-24
	A: P-value showing if the difference between the proportion of edgetic gain perturbations associated with SMGs significantly differs from the proportion of edgetic perturbations associated with random genes at the first degree neighbours. B: P-value showing if the difference between the proportion of edgetic gain perturbations associated with SMGs significantly differs from the proportion of edge…
Supplementary Table IIic: 9 cancer types show a significantly larger proportion of edgetic perturbations associated with SMGs when compared to the proportion of edgetic perturbations associated with random genes with similar degrees.
Cancer type	genes in gains	Number of edges gained as 1st neighbours of random genes		Number of edges gained as 1st or 2nd neighbours of random genes		genes in losses	Number of edges lost as 1st neighbours of random genes		Number of edges lost as 1st or 2nd neighbours of random genes
			E		F			G		H
THCA	33	461	-	7282	2.42e-06	33	609	-	11057	-
BLCA	42	662	0.004	10818	0.01	46	851	-	10191	-
COAD	45	406	-	5345	5.64e-19	65	805	-	11817	-
KIRC	24	477	-	8001	-	23	452	-	12681	2.79e-43
KIRP	13	341	-	4567	-	19	354	-	9168	-
KICH	16	89	-	2799	1.97e-19	18	187	0.002	7824	2.21e-44
LUAD	34	431	-	8375	3.75e-16	46	450	4.39e-07	11082	8.99e-13
PRAD	28	247	-	7109	1.05e-30	30	467	-	9265	-
LUSC	20	261	8.9e-11	5127	0.01	25	470	-	10132	-
LIHC	44	1508	-	23235	-	45	1705	3.84e-14	30974	1.93e-24
	E: P-value showing how significantly large the proportion of edgetic gains associated with SMGs is when compared to edgetic gain perturbations associated with randomly generated genes on the first degree neighbours. F: P-value showing how significantly large the proportion of edgetic gains associated with SMGs is when compared to edgetic gain perturbations associated with randomly generated genes…

## Sheet: All SMGs in edgetic Gains
Suppementary table IIId: SMGs involved in edgetic gains and paired randomly generated genes with a similar degree
BLCA
Degree	SMGs		NonSMGs
15	Q07352		Q9Y2T7
17	P62745		Q9HAT8
18	P01111		Q9UPM8
21	Q14517		Q96AY4
23	Q8NEZ4		Q96IZ5
25	O15550		O75030
29	O14686		Q9Y448
30	Q76L83		O43187
30	P18074		Q9H4I3
32	Q9H3M7		Q9UBB4
35	P22607		P12235
37	Q9NRR4		Q9NXH9
37	Q8N3U4		Q9P275
42	Q7Z3B3		P34896
46	Q92574		Q8N448
47	Q14344		Q15276
48	P78545		O43920
48	Q13887		Q9P253
50	Q9BZK7		Q9UQB8
51	O75475		Q6P5Z2
51	Q04721		Q9NZL4
57	O14497		Q9UHV9
63	O15151		O14746
63	O14746		P50148
63	Q16236		O14746
70	P55317		Q13123
70	P42336		P17482
74	P01112		Q8WV44
74	P98175		Q8TDY2
120	Q15637		Q93008
139	P61586		O43318
144	Q13813		P62266
149	Q8N726		P98170
168	Q13315		P14618
168	P21860		Q15287
182	O75533		P19784
201	P46531		P62701
205	Q9C009		P61247
205	P19793		Q9UBS0
219	P06400		P48023
265	P60484		Q14103
268	P38936		P12956
294	Q969H0		Q7Z7A1
294	P35222		Q93009
296	Q92793		P46934
400	P42771		P34897
450	Q09472		P63279
451	P01116		P78362
653	Q13616		Q9NRC8
1007	P04637		Q13573
BRCA
Degree	SMGs		NonSMGs
1	Q9UJQ4		Q96SL8
7	O43283		Q86YV5
15	P98095		Q9BT09
17	O15119		P28845
19	O15297		P41161
23	Q8NEZ4		Q9UHY7
23	P23771		Q9UHY7
25	P21359		Q6PGP7
25	P23468		Q9H0N5
26	Q16288		Q96MF7
27	Q13951		Q96ST2
36	Q8NFD5		Q9H871
37	Q86U86		Q9UIG0
37	Q96QZ7		O75534
38	Q14202		Q14739
39	P41212		Q9BYN0
42	P45985		Q9NX65
44	P49711		Q9NXR7
55	O14497		Q9Y4W6
57	Q92560		Q96QD9
67	P51587		O75934
70	P55317		Q6UWR7
73	Q01196		Q13287
75	P42336		Q92667
75	P46527		Q92667
93	P24385		Q9Y2J2
103	Q14145		P40222
109	Q96GM5		Q13114
121	Q14839		Q13490
129	Q9UM11		O15111
139	Q13233		Q9UJV3
153	Q14790		P36952
160	P27986		Q05086
161	O75376		P25705
167	P12830		Q8NHQ1
181	O75533		Q9Y3E0
199	P46531		P37840
227	P06400		Q08211
267	P21333		Q86WV1
271	Q99728		P62241
277	P60484		Q8TBB1
293	Q969H0		P62857
300	P31749		Q9C009
451	P01116		Q13617
461	Q09472		P13612
557	P38398		P62993
718	P03372		P24941
730	Q99496		Q15910
1015	P04637		P00533
1007	P04637		Q13573
COAD
Degree	SMGs		NonSMGs
2	Q9UJQ4		Q6ZVC0
2	Q9BXY4		Q9Y5E6
3	Q969W9		Q687X5
4	P54098		Q9P227
4	Q8TDW7		Q9Y6X4
4	Q5VW00		Q9Y366
5	Q86UU0		Q6UW63
5	O95214		P09238
6	P47974		P21506
8	Q13017		Q70EK9
10	Q6UXX9		Q92843
10	Q13029		O76024
10	P78324		Q9Y6W3
11	Q96AJ9		O15440
13	P48436		P32242
14	Q5JTC6		Q9UQK1
14	Q9ULT6		P00918
14	P98095		Q9ULV3
15	O15013		Q14692
15	Q6NWY9		B0FP48
15	P78549		Q9H4M3
16	Q9UPS6		Q9NQU5
18	Q9HCK4		Q9NVS9
18	P01111		P02749
20	Q9Y2T1		Q13239
20	Q6FHJ7		O43813
21	Q8WVM7		Q9P2E3
22	Q9H0E7		Q9NSB8
23	Q15583		Q969V6
25	P27037		Q96F24
26	Q12879		O14531
26	Q9NRL2		O75379
27	P61769		P52630
28	Q15375		O75943
28	O75943		P78346
30	Q07864		Q6UXB4
31	Q9NQB0		O00189
32	Q9H6R7		Q66PJ3
34	Q14202		Q02224
36	P29320		O15519
38	P15056		Q16537
41	P45985		Q6PKC3
44	Q13948		P36871
44	P39880		P61106
52	Q9BZK7		P02794
55	O14497		P22415
56	Q02750		P23443
57	Q96PU8		Q96GQ7
58	P28340		Q7KZ85
70	Q07812		Q70CQ1
71	O15169		Q9Y6I3
72	P42336		Q8NBT2
78	P63092		Q14315
80	P37173		Q6PKG0
84	P60228		P53621
114	O95071		Q01081
118	P43246		P36542
131	P40692		P17252
138	Q5JWF2		P04004
142	Q16665		Q02543
150	P27986		P61964
151	P52701		P50990
156	P08151		O14744
160	P21860		Q14129
164	Q15365		P17931
166	Q13485		Q07020
181	P25054		P52292
208	O95467		Q9H3D4
230	O60216		P22087
233	Q15796		P60709
248	P12931		P47755
264	P60484		Q5S007
277	Q969H0		Q00610
298	P35222		P46934
299	P31749		Q93009
320	P84022		P31946
426	Q00987		P27348
428	P01116		Q86X19
442	Q09472		Q7Z7A1
982	P04637		Q9HCE1
HNSC
Degree	SMGs		NonSMGs
1	Q32MQ0		Q53FT3
4	Q6V0I7		Q86UQ0
12	Q13029		Q8N5G2
14	P78324		O43448
17	Q5H9F3		P31274
20	Q14517		Q9UGM3
20	Q9NWH9		O95922
22	Q13882		Q9UBG3
23	P07332		A6NHL2
25	P23468		Q9NQR4
25	Q96IF1		Q13480
28	O14686		Q86SE9
29	O15550		Q14CS0
38	Q96L73		Q9NRX2
38	P22607		O60637
39	P08581		Q9UKX2
43	Q68CP9		P19447
44	P49711		Q9UI12
53	P29317		P68402
56	P20936		O00471
58	P49815		Q15819
67	Q16236		Q13416
70	P01889		Q6UWR7
73	P01112		O60518
73	P42336		O60518
81	P37173		Q99081
110	Q14145		P52294
129	Q9H3D4		P09493
147	P61586		P35232
153	P42345		P62906
157	Q14790		P60866
172	Q9NQC7		P61088
174	P63000		O95718
188	P21860		P04183
203	P46531		O00560
228	P11940		Q9UNE7
231	P06400		P09874
240	P28482		Q8IUH5
271	P21333		Q92633
277	P60484		P54253
279	Q8N726		Q6P5W5
301	Q969H0		P62158
319	P35579		Q66GS9
406	P42771		P34897
456	Q7Z6Z7		P15927
470	Q09472		P13612
1014	P04637		Q9HCE1
1209	Q13618		P49736
KICH
Degree	SMGs		NonSMGs
17	P19484		Q8NHL6
19	P23468		Q9Y296
24	O15550		Q15155
27	O14686		A6ND91
36	Q96QZ7		Q9Y496
38	Q13882		P10586
42	Q92574		Q16718
54	O14497		P49770
57	Q92560		P15941
60	P49815		O95777
142	P42345		O43865
148	Q16665		P84098
191	P35240		Q9UHB6
269	P60484		P25788
279	Q00610		P36873
309	P40337		P03372
711	Q99496		P03372
1025	P04637		Q9HCE1
KIRC
Degree	SMGs		NonSMGs
15	Q76L83		Q9H6H4
21	P07333		P69892
22	Q9BYW2		Q9Y468
26	P37275		P20930
27	P23468		Q9Y3P9
28	P16157		Q14997
29	O14686		P19086
33	Q96QZ7		Q7L804
37	Q13882		Q14444
40	Q86U86		O15511
42	P41229		P20749
58	Q12756		Q9P209
60	Q92560		P51948
60	P49815		P46821
72	O95251		O14777
74	P42336		Q9UBV8
138	Q15369		P68036
146	Q16665		P62888
150	P42345		P98170
176	Q13315		P10636
197	P35240		P25786
284	P60484		Q00610
284	Q00610		P62158
318	P40337		Q13148
727	Q99496		Q15910
1030	P04637		Q9HCE1
KIRP
Degree	SMGs		NonSMGs
19	Q9NWH9		Q9Y6K0
20	P23468		Q96BN8
22	Q9BYW2		P33897
23	Q92733		Q96HH9
24	P19532		Q7L7X3
26	O15550		P61626
28	O14686		O75844
32	Q96QZ7		Q9HB65
40	P08581		Q8WW22
58	P49815		Q9UNH7
60	Q92560		Q9UN86
71	P42336		Q9Y3T9
107	Q12824		Q15370
136	Q15233		Q13415
145	Q16665		P51148
156	P23246		Q99816
196	P35240		O43390
275	Q00610		P49841
448	P01116		P15927
717	Q99496		Q15910
1186	Q13618		P68431
LIHC
Degree	SMGs		NonSMGs
6	Q6V0I7		Q8TB37
14	Q68CJ9		O75679
23	Q9Y2T1		Q13325
34	P40189		Q9NX24
35	P27037		P62312
42	Q96QZ7		O14514
43	Q8NFD5		Q9Y5P6
51	P01111		O00743
52	O75874		Q02930
52	P04114		O75947
52	P51812		Q12849
56	Q9NPI1		Q68EM7
56	O96028		Q68EM7
61	P49815		P49427
63	Q8WUM0		P49848
64	Q92560		Q9NX04
64	Q8N653		Q9Y371
69	O14497		Q8NBS9
70	Q68CP9		Q9UHI6
71	O15169		Q9UN86
73	Q16236		P48443
86	P63092		Q9Y3A3
87	P42336		Q86TM6
90	P10412		Q8NE63
95	P25685		Q96LR5
114	Q14145		P49336
138	Q5JWF2		P05141
162	P17252		P30050
174	P17612		P62906
187	O14746		P04049
208	O95467		P63000
222	P02768		P61247
229	P25054		O43889
233	P51532		P78406
245	Q08211		Q9H2C0
262	P06400		P07437
272	Q15796		P60709
294	Q8N726		Q9Y618
296	Q8TES7		P35228
327	P38936		Q8IZU0
360	P35222		P84022
410	P42771		P63104
429	P68104		P68400
532	P01116		O95817
795	Q99496		P02751
1366	O14980		Q9UBU9
1896	P04637		Q13573
LUAD
Degree	SMGs		NonSMGs
2	O43451		P22303
3	Q8NE35		Q5JPH6
4	O95214		Q9H013
5	P08922		Q6ZSS3
10	Q92963		P36551
12	Q8IYB1		Q8NDI1
12	Q16832		Q9NQM4
13	Q9H0E7		Q9Y600
15	Q9C0K0		P78508
18	Q12923		Q8TBX8
19	Q86UW6		P48163
20	Q9NWH9		Q9Y535
23	P23468		Q99547
23	O00291		O60673
24	Q9BYW2		Q9Y6D6
24	P21359		O60869
25	P42338		Q96HA7
28	Q96QZ7		Q9NSV4
32	Q8IWI9		A6NKD9
36	P29320		Q9Y2U8
36	P21802		P08240
37	Q9NRR4		Q9Y4R8
38	P15056		Q9BVI4
40	Q9NR09		Q9H814
40	P08581		P0CG08
41	Q16204		Q96S82
44	Q6PCD5		Q9NR50
47	P07949		Q6WCQ1
59	Q92560		O00139
59	O14497		Q92838
70	P42336		O15169
72	P98175		O60477
78	P12270		P54646
83	Q15831		P42229
85	P10398		Q969T4
93	Q15303		O00541
99	Q14145		Q8IZD2
113	Q92734		O43175
116	Q01081		O75439
119	P06753		Q01804
147	Q8N726		Q96CW5
164	Q13315		P55036
200	P51532		Q96CW1
219	P06400		P16104
297	P31749		P46934
299	P35222		P40337
400	P42771		P11021
442	P01116		Q09472
478	O75530		P27694
706	Q99496		P03372
866	P00533		P0CG48
972	P04637		P49736
1170	Q13618		Q9HCE1
LUSC
Degree	SMGs		NonSMGs
1	O14522		Q9H7V2
3	Q8NE35		Q86TN4
5	O95214		Q96K12
9	Q86UW6		Q8IWY9
11	P78324		Q9HC21
12	Q9NRY4		Q9NZ56
12	Q8IYB1		Q9H5V9
21	Q14517		O15068
23	Q9H0E7		Q9Y572
25	O15550		P19532
25	P23468		P15104
26	P21359		Q9Y4E5
28	O14686		O00461
36	P21802		Q92956
37	P29320		Q13952
44	Q6PCD5		P78334
49	Q13887		P32780
54	P20936		O14498
58	O14497		P53999
65	Q16236		O95163
69	P01112		P54257
71	P42336		Q9UPV0
99	Q14145		P32119
196	P46531		Q9Y265
221	P06400		Q9Y230
272	P60484		P38936
273	Q8N726		P15880
288	Q969H0		Q13643
400	P42771		Q93034
448	Q09472		P63279
974	P04637		P0CG48
1167	Q13618		Q9HCE1
PRAD
Degree	SMGs		NonSMGs
1	O15393		Q9H633
5	Q9UJQ4		Q6UW78
7	Q15911		Q8IYQ7
8	Q8WVQ1		Q8N365
10	P28324		O96009
12	P43268		Q9Y4F9
13	P20151		O14618
15	Q99612		Q9Y5A6
20	P41161		Q7Z4K8
23	O15550		Q6DKK2
24	Q9NNX6		Q9NU19
26	Q12809		A0FGR8
28	Q15011		P29622
29	O14686		O43567
30	O95573		Q15672
35	O43791		Q9UQ16
36	Q14202		Q8TEB7
38	P50549		O15519
39	P15056		P53990
42	P55317		P25815
51	O75874		Q9NV56
69	P42336		Q7Z434
72	O15169		Q9UPQ9
73	P01112		Q9Y2H9
81	P11308		P37173
91	Q93074		O00410
109	Q92597		Q9UHK0
152	P04049		P50990
184	P25054		P19784
191	P22626		Q9UHB6
204	P17844		Q9UMX0
267	P60484		Q99623
287	Q9Y618		Q13643
292	P31749		P12004
303	P35222		P11441
984	P04637		P0CG48
STES
Degree	SMGs		NonSMGs
4	Q8TDW7		Q8NG11
5	Q86UU0		Q7Z412
7	Q15911		P19883
11	Q13029		Q96K37
14	Q9ULT6		Q7Z7A3
18	Q12923		O75608
19	Q13882		Q9Y248
19	Q9Y2T1		O95372
24	P27037		Q00537
27	Q12879		A0MZ66
32	Q07864		Q9BWJ5
34	Q6FHJ7		O94913
39	Q9NR09		Q9BYN0
46	P15056		O14828
50	Q9H6X2		Q01814
68	P42336		O60664
92	Q15303		Q8N7W2
96	P12830		O75955
110	Q13535		P02533
122	O95071		P47897
123	Q9UM11		Q96MT8
144	P61586		P42224
157	P08151		Q14129
163	P21860		Q15691
THCA
Degree	SMGs		NonSMGs
9	Q06710		P61599
11	Q9NQX6		Q92545
17	O15297		Q16890
17	Q86VS8		P30038
24	Q8TBA6		P29376
26	Q13772		Q9UBI6
32	Q9UIS9		P50579
33	P16473		Q02447
34	P47813		Q86YM7
35	P01111		O94763
43	P15056		O00469
45	Q16204		Q6PH85
48	Q86UP2		Q92949
52	Q9Y6K1		P54136
61	O00255		O75150
62	Q8IUD2		O75886
66	O43815		Q9UGM1
66	Q99996		Q8NBS9
68	Q9UPN9		Q9NYL9
69	Q8N1F7		O95163
72	Q9UPY3		Q14686
77	P12270		Q13133
82	P10644		P12277
83	P01112		P38606
90	P17096		Q9BZE4
93	Q6P1J9		Q9H040
115	P06753		Q01081
118	P07949		P16615
124	Q92734		O43809
144	P37231		P43657
145	P42345		Q05D60
251	Q15154		Q96CS3
299	P31749		Q13200
319	P14373		P40337
460	P01116		Q66GS9

## Sheet: Top Random genes in Gains
Suppementary Table iiie: Tables showing the random genes having twice as many or more edgetic perurbaions than SMGs having a similar degree.
Cancer type	SMGs	NonSMGs	Shared Degree	Perturbations from Random genes	Perturbations from SMGs
THCA	O43815	Q9UGM1	66	66	3
THCA	Q86UP2	Q92949	48	16	4
THCA	P47813	Q86YM7	34	5	2
THCA	Q16204	Q6PH85	45	15	2
THCA	P01116	Q66GS9	460	154	35
THCA	P12270	Q13133	77	5	2
THCA	P42345	Q05D60	145	49	4
THCA	P37231	P43657	144	48	11
THCA	Q8TBA6	P29376	24	8	3
COAD	P21860	Q14129	160	50	6
STES	Q13535	P02533	110	36	10
PRAD	Q92597	Q9UHK0	109	9	2
KICH	P35240	Q9UHB6	191	6	3
PRAD	Q14202	Q8TEB7	36	12	2
LUSC	Q969H0	Q13643	288	94	13
PRAD	P55317	P25815	42	14	3
LUAD	Q14145	Q8IZD2	99	33	2
LUAD	P06753	Q01804	119	40	6
LUAD	P98175	O60477	72	24	2
LIHC	Q92560	Q9NX04	64	10	3
LIHC	P38936	Q8IZU0	327	107	39
LIHC	P04637	Q13573	1896	495	93
LIHC	Q14145	P49336	114	6	3
LIHC	Q16236	P48443	73	25	4
LIHC	Q96QZ7	O14514	42	14	7
KIRP	P23246	Q99816	156	8	3
KIRP	Q99496	Q15910	717	244	26
KIRC	Q99496	Q15910	727	242	27
BRCA	Q99496	Q15910	730	245	46
KIRP	Q13618	P68431	1186	396	51
HNSC	Q7Z6Z7	P15927	456	29	14
KIRC	P42336	Q9UBV8	74	24	6
KIRC	P07333	P69892	21	7	2
KIRC	Q00610	P62158	284	20	9
KIRC	P35240	P25786	197	10	5
KIRC	Q13315	P10636	176	85	9
HNSC	P37173	Q99081	81	10	2
HNSC	P08581	Q9UKX2	39	13	2
HNSC	Q14517	Q9UGM3	20	6	2
HNSC	P21333	Q92633	271	91	12
HNSC	Q8N726	Q6P5W5	279	93	5
HNSC	P49815	Q15819	58	4	2
HNSC	Q16236	Q13416	67	7	3
HNSC	P42336	O60518	73	23	4
HNSC	P01112	O60518	73	23	3
COAD	P42336	Q8NBT2	72	36	3
COAD	Q09472	Q7Z7A1	442	146	15
BLCA	Q969H0	Q7Z7A1	294	145	19
BRCA	P31749	Q9C009	300	100	21
BRCA	P46527	Q92667	75	25	2
BRCA	P42336	Q92667	75	25	6
BRCA	P21333	Q86WV1	267	88	9
BRCA	Q969H0	P62857	293	98	20
BRCA	Q14145	P40222	103	8	4
BRCA	Q14790	P36952	153	51	20
BLCA	P19793	Q9UBS0	205	15	7
BLCA	Q8NEZ4	Q96IZ5	23	5	2
BLCA	P18074	Q9H4I3	30	10	2
BLCA	P06400	P48023	219	73	15
BLCA	P42336	P17482	70	33	2
BLCA	O15151	O14746	63	63	6
BLCA	Q16236	O14746	63	63	2

## Sheet: All SMGs in edgetic Losses
Suppementary table IIIf: SMGs involved in edgetic losses and paired randomly generated genes with a similar degree
BLCA
Degree	SMGs		NonSMGs
15	Q07352		Q8NFG4
17	P62745		Q9NUD5
18	P01111		P31949
21	Q14517		Q9H2G2
23	Q8NEZ4		Q9H6S0
25	O15550		Q9UQN3
29	O14686		P46734
30	Q76L83		Q86XE5
30	P18074		Q9H4I3
32	Q9H3M7		Q6PF06
35	P22607		O43264
37	Q9NRR4		Q9H9B1
37	Q8N3U4		Q9P275
42	Q7Z3B3		P13929
46	Q92574		Q8N448
47	Q14344		Q13557
48	P78545		O14519
48	Q13887		Q9P253
50	Q9BZK7		P10828
51	O75475		P14555
51	Q04721		Q9NZL4
57	O14497		Q9UKY1
63	O15151		Q9Y2M5
63	O14746		Q9Y2M5
63	Q16236		P50148
70	P55317		Q13123
70	P42336		P17482
74	P01112		P98082
74	P98175		Q8TDY2
120	Q15637		P42766
139	P61586		P14625
144	Q13813		P62266
149	Q8N726		P62820
168	Q13315		P14618
168	P21860		Q15287
182	O75533		P19784
201	P46531		P62701
205	Q9C009		P61247
205	P19793		Q9UBS0
219	P06400		P48023
265	P60484		Q14103
268	P38936		P12956
294	Q969H0		Q7Z7A1
294	P35222		Q93009
296	Q92793		P46934
400	P42771		P34897
450	Q09472		P63279
451	P01116		P78362
653	Q13616		Q9NRC8
1007	P04637		Q13573
BRCA
Degree	SMGs		NonSMGs
1	Q9UJQ4		Q96G79
7	O43283		P38435
15	P98095		Q96PG8
17	O15119		P55789
19	O15297		P39060
23	Q8NEZ4		P09017
23	P23771		P09017
25	P21359		Q9Y2Z4
25	P23468		Q9H0N5
26	Q16288		Q14696
27	Q13951		Q96HA7
36	Q8NFD5		Q9NZM5
37	Q86U86		Q9NR09
37	Q96QZ7		O75534
38	Q14202		Q13642
39	P41212		Q9HB75
42	P45985		Q9NX65
44	P49711		Q9NWA0
55	O14497		O76064
57	Q92560		P05549
67	P51587		O75934
70	P55317		Q6UWR7
73	Q01196		Q13111
75	P42336		O94966
75	P46527		O94966
93	P24385		Q9Y2J2
103	Q14145		P21281
109	Q96GM5		P55795
121	Q14839		Q8N4C6
129	Q9UM11		Q15047
139	Q13233		P25963
153	Q14790		P56537
160	P27986		Q05086
161	O75376		Q92614
167	P12830		Q8NHQ1
181	O75533		Q9Y3E0
199	P46531		P37840
227	P06400		Q08211
267	P21333		Q86WV1
271	Q99728		P62241
277	P60484		Q8TBB1
293	Q969H0		P62857
300	P31749		Q9C009
451	P01116		Q13617
461	Q09472		Q7Z6Z7
557	P38398		P62993
718	P03372		P24941
730	Q99496		Q15910
1015	P04637		P00533
1007	P04637		Q13573
COAD
Degree	SMGs		NonSMGs
2	Q9UJQ4		P47874
2	Q9BXY4		Q9Y5E6
3	Q969W9		Q8TC76
4	P54098		Q9BW11
4	Q8TDW7		Q9Y6X4
4	Q5VW00		Q9Y366
5	Q86UU0		Q9BZ29
5	O95214		P09238
6	P47974		Q7Z628
8	Q13017		P53609
10	Q6UXX9		Q86X52
10	Q13029		O76024
10	P78324		Q9Y6W3
11	Q96AJ9		Q9NSI8
13	P48436		Q8N9M1
14	Q5JTC6		Q86UR1
14	Q9ULT6		P00918
14	P98095		Q9ULV3
15	O15013		B0FP48
15	Q6NWY9		Q96BY2
15	P78549		Q9H4M3
16	Q9UPS6		Q9UPX8
18	Q9HCK4		P17026
18	P01111		P02749
20	Q9Y2T1		P48736
20	Q6FHJ7		O43813
21	Q8WVM7		A0FGR8
22	Q9H0E7		Q9UF56
23	Q15583		Q969Q0
25	P27037		Q9NWB6
26	Q12879		Q5QGZ9
26	Q9NRL2		O75379
27	P61769		Q9UJX0
28	Q15375		Q9NS87
28	O75943		P78346
30	Q07864		P13489
31	Q9NQB0		Q86TI2
32	Q9H6R7		Q9UM82
34	Q14202		O95168
36	P29320		Q14469
38	P15056		O95905
41	P45985		Q00653
44	Q13948		Q9Y4J8
44	P39880		P61106
52	Q9BZK7		Q2TAY7
55	O14497		P09619
56	Q02750		P61081
57	Q96PU8		P27816
58	P28340		Q9P209
70	Q07812		P49773
71	O15169		O15372
72	P42336		P62306
78	P63092		P35558
80	P37173		Q9BUZ4
84	P60228		Q9Y4B6
114	O95071		Q13895
118	P43246		Q13490
131	P40692		P05362
138	Q5JWF2		Q14204
142	Q16665		O43542
150	P27986		P61964
151	P52701		P50990
156	P08151		O14744
160	P21860		Q14129
164	Q15365		P17931
166	Q13485		Q07020
181	P25054		P52292
208	O95467		Q9H3D4
230	O60216		P22087
233	Q15796		Q13263
248	P12931		P47755
264	P60484		Q5S007
277	Q969H0		Q00610
298	P35222		P46934
299	P31749		Q93009
320	P84022		P31946
426	Q00987		P27348
428	P01116		Q86X19
442	Q09472		Q7Z7A1
982	P04637		Q9HCE1
HNSC
Degree	SMGs		NonSMGs
1	Q32MQ0		Q16853
4	Q6V0I7		Q8WZ59
12	Q13029		Q96NZ9
14	P78324		O60259
17	Q5H9F3		P43897
20	Q14517		Q7L0Y3
20	Q9NWH9		O95922
22	Q13882		Q5T160
23	P07332		Q9UPM6
25	P23468		Q9H6S0
25	Q96IF1		Q13480
28	O14686		O15127
29	O15550		Q14126
38	Q96L73		Q9P2M7
38	P22607		O60637
39	P08581		Q12830
43	Q68CP9		Q7L9L4
44	P49711		Q9UBD5
53	P29317		P61163
56	P20936		Q16555
58	P49815		Q07002
67	Q16236		P04264
70	P01889		Q9Y2X9
73	P01112		O60518
73	P42336		Q15046
81	P37173		P23526
110	Q14145		Q08945
129	Q9H3D4		P18621
147	P61586		O43542
153	P42345		P56537
157	Q14790		Q92614
172	Q9NQC7		Q9ULK4
174	P63000		Q08999
188	P21860		P13639
203	P46531		O00560
228	P11940		Q9UNE7
231	P06400		P09874
240	P28482		Q8IUH5
271	P21333		Q8TBB1
277	P60484		P54253
279	Q8N726		Q6P5W5
301	Q969H0		P62158
319	P35579		Q66GS9
406	P42771		P34897
456	Q7Z6Z7		P15927
470	Q09472		P13612
1014	P04637		Q9HCE1
1209	Q13618		P49736
KICH
Degree	SMGs		NonSMGs
17	P19484		Q658Y4
19	P23468		P55789
24	O15550		P33552
27	O14686		O15347
36	Q96QZ7		Q13362
38	Q13882		P08581
42	Q92574		P25815
54	O14497		Q9NR96
57	Q92560		P35568
60	P49815		O95257
142	P42345		O75478
148	Q16665		P84098
191	P35240		Q9UHB6
269	P60484		P25788
279	Q00610		Q6P5W5
309	P40337		P36873
711	Q99496		P03372
1025	P04637		Q9HCE1
KIRC
Degree	SMGs		NonSMGs
15	Q76L83		Q9BZL4
21	P07333		P69892
22	Q9BYW2		O43166
26	P37275		Q9NW97
27	P23468		O43602
28	P16157		O75844
29	O14686		Q9Y697
33	Q96QZ7		Q13009
37	Q13882		Q6IN84
40	Q86U86		Q13564
42	P41229		Q9BZJ0
58	Q12756		Q9Y5U2
60	Q92560		Q8N653
60	P49815		P46821
72	O95251		P48023
74	P42336		Q12931
138	Q15369		Q12834
146	Q16665		P15311
150	P42345		P00441
176	Q13315		P45983
197	P35240		P46531
284	P60484		P36873
284	Q00610		P62158
318	P40337		Q13148
727	Q99496		Q15910
1030	P04637		Q9HCE1
KIRP
Degree	SMGs		NonSMGs
19	Q9NWH9		Q96C24
20	P23468		Q96AY3
22	Q9BYW2		P07099
23	Q92733		Q69YN4
24	P19532		Q8N128
26	O15550		Q15573
28	O14686		Q9UBI6
32	Q96QZ7		Q9UJY4
40	P08581		Q8WUA4
58	P49815		Q9UNH7
60	Q92560		Q7KZ85
71	P42336		O00505
107	Q12824		Q15370
136	Q15233		P25963
145	Q16665		P42345
156	P23246		P45973
196	P35240		Q96T76
275	Q00610		P49841
448	P01116		P15927
717	Q99496		Q15910
1186	Q13618		P68431
LIHC
Degree	SMGs		NonSMGs
6	Q6V0I7		Q8N565
14	Q68CJ9		P57059
23	Q9Y2T1		O00221
34	P40189		Q9UNX4
35	P27037		P43487
42	Q96QZ7		Q7Z4V5
43	Q8NFD5		Q9P2R7
51	P01111		Q9BTY7
52	O75874		Q5SRE5
52	P04114		O75947
52	P51812		Q12849
56	Q9NPI1		Q99959
56	O96028		Q99959
61	P49815		Q15555
63	Q8WUM0		P40121
64	Q92560		Q9NX04
64	Q8N653		Q9Y371
69	O14497		Q9UKR5
70	Q68CP9		Q5VTR2
71	O15169		O75312
73	Q16236		P09972
86	P63092		Q15468
87	P42336		Q14686
90	P10412		Q00341
95	P25685		Q6NXE6
114	Q14145		Q9HBV2
138	Q5JWF2		P43403
162	P17252		Q9UBB9
174	P17612		P62906
187	O14746		P17987
208	O95467		P63000
222	P02768		P61247
229	P25054		O43889
233	P51532		P78406
245	Q08211		Q9H2C0
262	P06400		P07437
272	Q15796		P60709
294	Q8N726		P38919
296	Q8TES7		P35228
327	P38936		Q8IZU0
360	P35222		P84022
410	P42771		P63104
429	P68104		P68400
532	P01116		O95817
795	Q99496		P02751
1366	O14980		Q9UBU9
1896	P04637		Q13573
LUAD
Degree	SMGs		NonSMGs
2	O43451		Q9Y3A6
3	Q8NE35		Q8TC05
4	O95214		P48067
5	P08922		Q96HY7
10	Q92963		Q8IZA0
12	Q8IYB1		Q8NC60
12	Q16832		Q9NQM4
13	Q9H0E7		O76080
15	Q9C0K0		Q9H063
18	Q12923		Q9H857
19	Q86UW6		Q5EB52
20	Q9NWH9		Q9UQR1
23	P23468		P09960
23	O00291		O60673
24	Q9BYW2		Q14207
24	P21359		O60869
25	P42338		Q9Y4P8
28	Q96QZ7		P62068
32	Q8IWI9		P28838
36	P29320		P42773
36	P21802		P08240
37	Q9NRR4		Q8N5I2
38	P15056		Q9NUL7
40	Q9NR09		Q9HD15
40	P08581		P0CG08
41	Q16204		P55040
44	Q6PCD5		Q53GQ0
47	P07949		Q92785
59	Q92560		P49848
59	O14497		Q92838
70	P42336		P56279
72	P98175		Q9UPQ9
78	P12270		P07307
83	Q15831		P15924
85	P10398		Q05513
93	Q15303		O00541
99	Q14145		Q8N5N7
113	Q92734		Q13011
116	Q01081		Q01167
119	P06753		Q01804
147	Q8N726		P62266
164	Q13315		P55036
200	P51532		P67775
219	P06400		P05412
297	P31749		O95793
299	P35222		P40337
400	P42771		P11021
442	P01116		Q09472
478	O75530		P27694
706	Q99496		P03372
866	P00533		P0CG48
972	P04637		P49736
1170	Q13618		Q9HCE1
LUSC
Degree	SMGs		NonSMGs
1	O14522		Q9UKQ2
3	Q8NE35		Q53QV2
5	O95214		Q96FE5
9	Q86UW6		P13497
11	P78324		Q4ZG55
12	Q9NRY4		Q96G01
12	Q8IYB1		Q9H5V9
21	Q14517		Q9NS39
23	Q9H0E7		Q9Y2V2
25	O15550		Q13522
25	P23468		P15104
26	P21359		P14550
28	O14686		O00461
36	P21802		O60238
37	P29320		P04179
44	Q6PCD5		Q8WW24
49	Q13887		Q6UWE0
54	P20936		P09884
58	O14497		Q8IWX8
65	Q16236		P06454
69	P01112		Q9Y3T9
71	P42336		O15372
99	Q14145		Q9UI15
196	P46531		P43115
221	P06400		Q9Y230
272	P60484		P38936
273	Q8N726		P15880
288	Q969H0		Q13643
400	P42771		Q93034
448	Q09472		P63279
974	P04637		P0CG48
1167	Q13618		Q9HCE1
PRAD
Degree	SMGs		NonSMGs
1	O15393		Q9UQD0
5	Q9UJQ4		Q9Y426
7	Q15911		Q8IV50
8	Q8WVQ1		Q8N8U2
10	P28324		P08247
12	P43268		Q8WXS4
13	P20151		O14713
15	Q99612		Q9Y5Y6
20	P41161		Q9UBU7
23	O15550		P40259
24	Q9NNX6		Q9NZQ3
26	Q12809		A0FGR8
28	Q15011		P62508
29	O14686		Q14997
30	O95573		Q15785
35	O43791		O15304
36	Q14202		Q8TEB7
38	P50549		A7KAX9
39	P15056		P49750
42	P55317		P58753
51	O75874		Q86WJ1
69	P42336		Q96M89
72	O15169		Q8TDY2
73	P01112		Q9H3U1
81	P11308		Q8N0S2
91	Q93074		P09622
109	Q92597		P04075
152	P04049		P62424
184	P25054		P45983
191	P22626		Q9UHB6
204	P17844		Q9UMX0
267	P60484		Q99623
287	Q9Y618		Q13643
292	P31749		P12004
303	P35222		P11441
984	P04637		P0CG48
STES
Degree	SMGs		NonSMGs
4	Q8TDW7		Q96CP7
5	Q86UU0		Q8NEF9
7	Q15911		O60443
11	Q13029		Q8NCR6
14	Q9ULT6		Q8TCV5
18	Q12923		Q6NZ67
19	Q13882		Q96RQ3
19	Q9Y2T1		O95372
24	P27037		Q9Y5J7
27	Q12879		Q96IX5
32	Q07864		Q9BWJ5
34	Q6FHJ7		O00154
39	Q9NR09		Q9NZ52
46	P15056		Q6FI81
50	Q9H6X2		Q9C0C9
68	P42336		Q9ULV8
92	Q15303		Q14134
96	P12830		Q9UJ41
110	Q13535		Q9BVA1
122	O95071		P47897
123	Q9UM11		Q96MT8
144	P61586		Q99873
157	P08151		Q15466
163	P21860		Q15691
THCA
Degree	SMGs		NonSMGs
9	Q06710		P55064
11	Q9NQX6		Q9UHB4
17	O15297		Q16352
17	Q86VS8		P30038
24	Q8TBA6		P29376
26	Q13772		Q9NUU7
32	Q9UIS9		Q9Y4W2
33	P16473		Q5M9N0
34	P47813		Q7L804
35	P01111		P57076
43	P15056		P11532
45	Q16204		Q2NKX8
48	Q86UP2		P30837
52	Q9Y6K1		Q14161
61	O00255		O75150
62	Q8IUD2		O75886
66	O43815		Q9Y333
66	Q99996		Q8NBS9
68	Q9UPN9		Q9NYL9
69	Q8N1F7		P00387
72	Q9UPY3		Q14686
77	P12270		Q13489
82	P10644		P85037
83	P01112		Q15020
90	P17096		Q9BUZ4
93	Q6P1J9		Q9H040
115	P06753		Q92922
118	P07949		P16615
124	Q92734		P42677
144	P37231		P43657
145	P42345		Q05D60
251	Q15154		Q96CS3
299	P31749		Q13200
319	P14373		P40337
460	P01116		Q66GS9

## Sheet: Top Random genes in Losses
Suppementary Table IIIg: Tables showing the random genes having twice as many or more edgetic perurbaions than SMGs having a similar degree.
Cancer type	SMGs	NonSMGs	Shared Degree	Perturbations from Random genes	Perturbations from SMGs
THCA	P01116	Q66GS9	460	153	52
HNSC	P35579	Q66GS9	319	155	19
THCA	P16473	Q5M9N0	33	11	4
THCA	Q16204	Q2NKX8	45	15	3
THCA	P31749	Q13200	299	148	26
THCA	P42345	Q05D60	145	48	9
THCA	P37231	P43657	144	48	14
THCA	P15056	P11532	43	6	2
THCA	Q8N1F7	P00387	69	33	8
STES	P12830	Q9UJ41	96	32	6
STES	Q13535	Q9BVA1	110	55	6
STES	Q9ULT6	Q8TCV5	14	7	3
PRAD	P60484	Q99623	267	130	15
PRAD	P42336	Q96M89	69	34	6
PRAD	Q14202	Q8TEB7	36	12	2
PRAD	P11308	Q8N0S2	81	27	2
PRAD	O75874	Q86WJ1	51	5	2
LUSC	Q969H0	Q13643	288	97	24
PRAD	Q92597	P04075	109	7	3
LUSC	P01112	Q9Y3T9	69	4	2
LUSC	Q14145	Q9UI15	99	33	2
LUSC	O15550	Q13522	25	9	2
LUSC	P46531	P43115	196	95	9
LUSC	Q8N726	P15880	273	11	5
LUAD	Q16832	Q9NQM4	12	6	2
LUAD	O14497	Q92838	59	6	3
LUAD	P06753	Q01804	119	39	11
LUAD	P42336	P56279	70	24	7
LUAD	P12270	P07307	78	39	2
LIHC	Q8NFD5	Q9P2R7	43	7	3
LIHC	Q14145	Q9HBV2	114	57	11
LIHC	Q08211	Q9H2C0	245	40	19
LIHC	P38936	Q8IZU0	327	109	42
LIHC	P49815	Q15555	61	28	5
BLCA	P04637	Q13573	1007	484	56
LIHC	P51532	P78406	233	109	26
BLCA	Q9C009	P61247	205	7	3
LIHC	Q8WUM0	P40121	63	21	8
LIHC	Q8N726	P38919	294	39	17
KIRP	O14686	Q9UBI6	28	4	2
KIRP	Q99496	Q15910	717	241	36
KIRC	Q99496	Q15910	727	241	44
BRCA	Q99496	Q15910	730	242	30
KIRP	Q13618	P68431	1186	384	63
KIRC	P07333	P69892	21	7	2
KICH	Q92574	P25815	42	14	3
HNSC	P11940	Q9UNE7	228	24	6
HNSC	Q96L73	Q9P2M7	38	19	6
HNSC	P21333	Q8TBB1	271	46	16
BRCA	P60484	Q8TBB1	277	48	15
HNSC	P63000	Q08999	174	58	15
HNSC	P01112	O60518	73	25	6
HNSC	O14686	O15127	28	5	2
HNSC	P46531	O00560	203	26	12
COAD	Q13948	Q9Y4J8	44	22	7
COAD	P28340	Q9P209	58	4	2
COAD	Q09472	Q7Z7A1	442	147	25
COAD	P60484	Q5S007	264	130	13
COAD	P21860	Q14129	160	55	16
COAD	O95071	Q13895	114	8	3
COAD	P52701	P50990	151	7	3
BRCA	P98095	Q96PG8	15	5	2
BRCA	P31749	Q9C009	300	100	26
BRCA	P12830	Q8NHQ1	167	19	6
BRCA	P21333	Q86WV1	267	89	17
BRCA	P55317	Q6UWR7	70	35	4
BRCA	Q969H0	P62857	293	97	22
BLCA	P06400	P48023	219	73	8
BLCA	O75475	P14555	51	24	3
