# Supplementary material for: Edgetic perturbation signatures represent known and novel cancer biomarkers
Source: Sci Rep. 2020 Mar 9;10:4350. doi: 10.1038/s41598-020-61422-3 (PMC7062722; doi:10.1038/s41598-020-61422-3)
Supplement: Supplementary file 5 — Table S4. [file 41598_2020_61422_MOESM5_ESM.xlsx]

## Sheet: Supplementary Table IVa
Supplementary Table IVa: Importance of the proteins involved in multiple edgetic perturbations or edges frequently perturbed across patients of a cancer type and their significance in predicting overall patient survival
Cancer type	Proteins involved in significant edgetic gains		Proteins involved in significant edgetic losses
	Top Gains	Top cancer-specific gains	Top losses	Top cancer-specific losses	SMGs within edgetic gains or losses	Interesting Genes from Survival analysis
BRCA	CDC25C**, TDO2, DST***	UPF2-HS3ST3A1	ALK, APOB, APP, ASB14, AURKC, AVPR2, C1QTNF9, CCDC36, DMRT3, ENPP6, ESR2, GFAP, HOXD4, HRNR, INCA1, KCNA5, LURAP1, MAP1LC3C, MASP1, MYH7B, MYOC, MYOCD, NOS2**, PPP2R2B, USP44	FOXF1**, F8***, VWF***	AKT1, BAP1, BRCA1, EP300, ESR1, FBLN2, FOXA1, KRAS, MAP3K1, NCOR1, NTRK3, PIK3R1, SALL4	CDK1, DYNLT1, HSP90AA1, MAPK3, MARK3, PLK3, HS3ST3A1, CALU, CCT5, CCT6A, CDIPT, C17orf79, CUL5, DNAJA1, DNAJA3, DNAJC7, EMD, HSPA5, LGALS3BP, NAP1L1, PLEC, PPM1B, PPP2R1A, PSMA1, PSMA2, PSMA4, PSMA6, PSMC5, PSMD14, PSMD2, PSMD4, PTBP1, PTGES3, RAC1, RPS18, RPS4X, SERPINE1, SLC25A5, STRAP, TCP1, UCHL5, YWHAQ, , STRBP
	HR (84/110) LR (26/110)	HR (110/110, 100%)	HR (74/110) LR (34/110)	HR (75/110) LR (35/110)
	BCAN,CATSPER1, FOXD4, FOXH1, GUCY1A2, HIST1H2AB, HIST1H2AE, HIST1H2BJ, HIST2H2AC**, HMGA2, KCNJ10, LRRC46, MAST1, OTX1, SLX4IP, TMEM52B, LONRF3***, RNF146***, SH3PB2***	DLG1, DLG3, DLG4, ERBIN, GUCY1A2**, GUCY1B1, HSP90AA1, HSPA4, LIN7A, SNTA1, STUB1	ACTA1**, ADCYAP1, ADRA1D, APP, ASB16, AURKC, AVPR2, BEX1, BMX, CLEC4G, CMTM5, EFHC2, ENPP6, FAM124A,FOXD3, GPM6A, GRIN2A, ISL1, KCNA3, KCNA5, MEFV, MYH7B, P2RY12, PRPH, RUNX1T1, RXRG, SCN2B,SOX5, STX1B, BTB20	KCNA3, FAM124A**, PIPOX, GNAQ***, ADHFE1***	ATM, CDKN2A, CTNNB1, CUL1, EP300, ERBB3, FBXW7, KRAS, MDM4, PIK3CA, PSIP1, PTEN, RB1, RBM10, SPTAN1, TP53, TSC1	CTCFL, EP300, ERCC6, HIST1H3G, INO80, MLLT1, NCL, NPM1, PRMT7, RBBP7, RNF20, TAF15, TAF1B,DLG3, GUCY1B3, LIN7A, ABL1, ABLIM2, ANXA1, BTK, CAPZA2, CDH2, CSNK1A1, DNASE1, ERBB3, ETV6, HDAC4, LRCH3, MIB2, PPP1CA, PPP1R1A, SCIN, SMARCB1, XPO6, FAM124A, STAC3, THAP1, ZBTB44, ZNF165, ZNF250, ZZZ3
BLCA	HR (16/19) LR (3/19)	HR (12/19) LR (7/19)	HR (18/19) LR (1/19)	HR (14/19) LR (5/19)
	HOXC9, FOXL2**, KHDRBS1***, DLG2***	CEBPE**	APP, ASB14, ASGR1, AURKC, BMX, CDKL3, FLT3, GDF9, GLIPR1L2, INCA1, PCK1**, RXRG, TSSK3, TUBB1, USP49, WNK4, ZNF396	WNK4**, GOSR2***, REPIN1***, BCAN***	AJUBA, CUL3, EP300, FBXW7, HLA-B, HUWE1, TP53	CCDC59, DDX52, DNAJC9, ELAVL1, HNRNPUL2, IARS, MOV10, NSDHL, NUP205, P4HA1, RPLP1, BATF, BATF3, E2F1, FOS, JUN, KDM2B, PSAT1, ACTB, APP, BAT3, FASN, GNAS, MAGED2, NUP62, PSMB1, PSMB4, PSMD12, RPL23, RPS6, TCP1, UBR5, WNK4, ABCC2, CHCHD2, MMGT1, SLC30A5, SSR1, TOMM20
HNSC	HR (15/42) LR (27/42)	HR (6/42) LR (36/42)	HR (15/42) LR (27/42)	HR (10/42) LR (32/42)
	ABCC2**, AGMAT, CDC25C, HPDL, KCNJ10, NEIL3, RGS17, SGO1, SOX30, SPC24, SPECC1***	SLC25A21**	ADRA1D, APOA1**, APP, ASB14, ASB16, AVPR2, BEX1, BMX, BTNL8, CAV3, CCDC36, COLEC10, DNASE2B, ENPP6, GATA1,GNMT, HSPB3, IL9R, INCA1, L1TD1, MYOC, OLIG1, PPARGC1B PTPN5, RAB40A, SH3GL2, SH3GL3, SLC2A4, TCAP, WNT3A	PPARGC1B**, SUPT3H***	AKT1, ARID1A, BAP1, CTNNB1,CUL3, DROSHA, EGFR, FGFR2, KRAS, MET, PIK3CA, SMARCA4, STK11, TP53	ABCC2, CHCHD2, MMGT1,MRPL10, SLC30A5, SSR1, TOMM20,TOMM22, NOSIP, APOL1, C1QC, DGAT1, GDPD1, NLRP1, PDE4B, PLTP, SPEF2, TNS3, APOA1BP, UCHL5, ZNRD1, PIAS1, THRB, ZFP64.
LUAD	LR (58/58, 100%)	HR (55/58) LR (3/58)	HR (20/58) LR (38/58)	HR (10/58) LR (48/58)
	HIST1H2AB / HIST1H2AE**, HPDL, NEIL3, HECW2***, SPECC1***	MED12L**	ACTN2, AGTR1, APOA1,APP, BIRC7, BTNL8, C1QTNF2, CCDC36, CD1B, CEBPE, CMTM5, DNASE2B, ESR2, FAM124B, FOXA3, GATA1, GDF9, GFI1B, IL9R INCA1, KCNA5, KHDRBS2, L1TD1, MAP1LC3C, MYH7B, MYOC, NR0B2, P2RY12, PACRG, RXRG, SH3GL2, TRIM55, TRIM69, TUBB1, USHBP1**, USP49, VTN	CD1B**, FAM124B,USP22***, SUPT3H***	ARID1A, CUL3, EP300, FAT1, FBXW7, FGFR2, KLF5, LEPROTL1, NOTCH1, PIK3CA, PTEN, RASA1, RB1, TP53, USP44	ACO1, ACTR2, BRCA1, CBX4, CBX8, CENPA, EIF2AK2, ERCC6, H2AFY, HNRNPA2B1, MAPK3, MCM2, MOV10, SHMT2, SUZ12, TRIP13, BET1, NGFRAP1, C1orf109, C1orf216, CCDC121, CCDC146, CCDC148, CCDC87, CEP63, CHCHD3, CNNM3, COPS4, CTNNBIP1, DTNB, EXOC7, EXOC8, FAM107A, FAM110A, FTL, GATAD2B, GCC1, GFI1B, GPSM1, HAUS1, HGS, IFT20, ING3, INTS4, KIAA0753, KLC3, KLC4, KRT19, LENG1, MCM7, MCRS1, MED28, MED4, MRPS23, N…
LUSC	HR (12/16), LR (4/16)	HR (13/16) LR (3/16)	HR (15/16) LR (1/16)	HR (13/16), LR (3/16)
	ASB14, CCNE2, CENPA, E2F2, ESCO2, HJURP IGF2BP3**, MSX2, PBK, POLE2, POTEF, SGO1 SKA3, TTK, RNF146***, SH3PB2***	ASB14**, CCNE2, MSX2 POTEF	ASB5, ATP12A, CALML3, CLNK, DKK1, FBN3, FOXI2, FOXN1, HEPACAM2, MYOZ2 NOS1, NR0B2**, PRMT8, RALYL, SOX30 TTR, VSIG2	DKK1-MDFI, REPIN1***, BCAN***	CUL3, KMT2D, MET, RNF2, SMARCB1	CAND1, CDK2, CNBP, COPS5, CRYZ, EIF2B2, EPRS, FBXO6, HNRNPA1, HNRNPU, IGF2BP3, KRT17, MDM2, MRE11A, NDUFAF4, COBRA1, OBSL1, RFC4, RPL23A, RPL26L1, RPL37A, RPL38, SIRT7, STAU1, UBC, ARF4, GALK1, SLC25A5, TUFM, CHRD, ESR1, ESRRG, FN1, HDAC1, HDAC3, HNF4G, HNRNPA1, IL3RA, KLF6, PLSCR1, PPARG, RBP5, SIRT6, SIRT7, SMAD4, SMARCA2, SMARCB1, SMARCC1, SNW1, SP2, TRAF6, MDFI
KIRP	HR (17/32), LR (15/32)	HR (3/32) , LR (29/32)	HR (13/32) LR (29/32)	HR (9/32) LR (23/32)
	CDC25C, CDC45, CDKN2A**, EME1, CENPA, FASLG, KIF14, LGALS9C, MCM10, NEIL3, SGO1, GRAMD2B***, GRAMD1C***	MLC1**	ASB14, BIK, BNIPL, CLNK, ESRRB**, FBN3, FOXA3, GRIK2, HAP1, OLFM4, RAB40A, SOX30, TCAP, USP44	BIK**, VSIG8***, SHC1***	ELOC, HIF1A, KAT7, MAGI1, PIK3CA, RNF2, TP53, VHL	ACLY, ARFIP2, ATR, AURKA, C1QBP, CASC3, CCND2, CCNG1, CDC7, CDK11A, CDK4, CDK5RAP3, COMMD1, CRELD2, CTBP2, DYRK1B, E2F1, EEF2, GGA1, HDAC1, HSP90AB1, HSPA8, IQGAP1, NAA38, MCM2, MDM2, MIS12, MOV10, MTR, NCL, WHSC1L1, ORC4L, PA2G4, PPP1CB, PPP1CC, PRKCA, RPP38, SNRPA, SNRPB, TP53, TTF1, TUBB, UBE2A, UBE2I, UBE4B, CAV1, DTNB, MYLK, SNTA1, ACSL3, ANXA2, ATP2A2, CANX, DNAJA1, DNAJB6, EGFR, ERRFI1, GF…
KIRC	HR (48/63) LR (15/63)	HR (28/63) LR (35/63)	HR (43/63) LR (20/63)	HR (39/63) LR (24/63)
	CST4, OT, KLC3**, MAPK15, CCNO***, CDKN1A***	CITED1**	APP, CA14, CACNA1A, CHST8, CMTM5, ENPP6, ESR2, FAM90A1, FOXH1, GDF9, GFI1B, HAP1, HIST1H2AG, HIST1H2AI, HIST1H2AK, HIST1H2AL,HIST1H2AM, KHDRBS2, MYOC, P2RY12, PPP2R2B, PTH1R RPL10L, SCN2B, SH3GL2, SUSD4, TAGLN3 TEX11, TP63, TRIM9, TTR, TUBB1, USP49 ZBTB16**	FAM184A, FOXH1, HIST1H2AG, HIST1H2AI, HIST1H2AK, HIST1H2AL, HIST1H2AM, PDIA2, RIMBP3, RPL10L**, ATP1B2, CMYA5, FBX027, HTR3E, ISL2, RIBC1, RNF152, TLX2, FLT1***, SHC1***	ACVR2A, AKT1, APC, AXIN1, AXIN2, B2M, BAX, CTNNB1, CUX1, EIF3E, EP300, EPHA7, ERBB3, FAT3, FBXW7, GRIN2A, HIF1A, KRAS, LEPROTL1, MDM2, MLH1, MSH2, PCBP1, PIK3CA, PIK3R1, PTEN, RSPO2, SALL4, SFRP4, SMAD2, SMAD3, SMAD4, SRC, TGFBR2, TGIF1, TP53, UBR5, USP44, ZNRF3	C3orf19, CCNB1, CD99L2, CENPP, CUL2, KLC3, ORC4L, PCMT1, RBBP6, TRIM26, HSPA8, LNX1, ANAPC5, ANXA7, BMI1, CDK4, DPM1, EEF1A1, HDAC3, HDAC7, IL32, MTDH, MX1, NCOR1, PAFAH1B3, PSMD11, SMN2, TERF1, THNSL2, TOLLIP, UBE2I, WDR33, CAND1, RPL31, RPL35, RPL36, RPL4, RPS21, RPS28, RPS3A, RPS7, TP53
COAD	LR (8/18), LR (10/18,)	HR (14/18) LR (4/18)	HR (8/18) LR (10/18)	HR (6/18) LR (12/18)
	CLEC5A, HOXA9, MAPK15, STAC3, TNFRSF9, TNFSF11**, ANK1***, TTN***	STAC3**	ADCYAP1, AGTR1, APP, ASB16, BMX, CAMK2B, CCT6B, EID3, ENPP6, ESR2, GPM6A, HSPA1L**, PACRG, RXRG, INA, LURAP1, SCN2B, SPIN2B, TCEANC, TRIM46, TRIM9, TSSK3, USHBP1, SPATA24, ZNF396	HSPA1L**, TCEANC, SPIN2B, EDA2R, CCT6B, USP6, ETFBKMT, CEP170B***	ATR, CDH1, ERBB3, FAT3, GRIN2A	B4GALT7, LMO4, MBTPS1, SBF1, SNRNP35, TRMT2A, PPARA, AP2M1, ARRB2, BAG4, CBL, CDC5L, CEP250, DCUN1D1, PTPLAD1, HSPA1L, MAP3K1, MRPS36, NDUFB9, NDUFV1, NFKB1, NUCB2, STUB1, TAB1, TBC1D22A, TRAF3IP1, TXN2, UBASH3B, XPO1, ZBTB1
STES	HR (11/37) LR (26/37)	HR (1/37), LR (36/37)	HR (22/37) LR (15/37)	HR (22/37) LR (15/37)
	CDC25C, CDCA2, CENPA**, DLX2, FOXD4, HASPIN, HIST3HWBB, SGO1, SPC25 CDC25C, DIDO1***, RPA1***	DLX2**	CACNA1A**, SOX30, DRD2, FABP4, KCNJ10, KIF5A, CCDC158, LGALS9C, FAM90A1, HIPK4, CMTM5, RSPH9, TUBB1, SGK2, RSPH14	LGALS9C**, BCAR3***, HOXC6***	ACSL3, DDX5, RAF1, TP53	DGCR6, MSX1, ATG9A, CD47, LGALS9, LGALS9C, RRAGB, SLC12A7, SLC38A9
PRAD	HR (4/52), LR (48/52)	HR (8/52) LR (44/52)	HR (13/52) LR (39/52)	HR (1/52) LR (51/52)
LIHC	EBF2-ZNF23, KANK2***, WDR83***	WNT3A**	AMHR2**	BMP10**, HR***, RARB***, DDX11***, SLAMF7***	NONE	FZD1, PPP2R1B, PPP2R5B, TRAF2, HSP90AA1
	NS	LR (50/50)	HR (1/50) LR (49/50)	HR (19/50) LR (31/50)
	ALK**, HIPK4, RAB40A, PDZK1, GRAMD2B***, GRAMD1C***	RAB40A**	VEGFD**	CSAG1**, ANKS1B***, ERBB4***	AKT1, PRKAR1A	ACTB, ACTN4, ALK, BCAR1, BICD2, CDK13, CENPF, CORO1C, EIF4B, EPHA1, EPHB2, ERRFI1, FLII, GAK, GRB2, HSP90AA1, HSPD1, IKBKG, IRF7, IRS1, JAK2, JAK3, KRT18, MAP2K7, MAP3K1, MAP3K4, MAP3K5, MAPK1, MAPK8IP3, MTIF2, MYH10, MYH9, MYO6, PDLIM3, PIK3CB, PIK3R1, PLCB2, PLCG1, PRKCQ, PTN, PXN, RAB35, RAD17, SHC1, SMC6, SOCS1, SOCS5, SRC, STAT3, TNK2, TUBB2C, TUBGCP2, ZC3HC1, HSP90AA1, ISCA1, LYRM7, PSME3, …
THCA	HR (27/58), LR (38/58)	HR (31/58) LR (27/58)	HR (34/58) LR (24/58)	HR (38/58) LR (20/58)
KICH	HRK**, SLC12A5, BRCA1***, OBSCN***	IL12B**	FOXE1, HIST1HIE, MYOC, PLG, TRIM15, VTN**	TRIM15**, PLG, SLC22A11, ASPH***, FBLN7***	RNF2, TP53, VHL
	(25/25)	(24/25)	(25/25)	(25/25)
	The ratios in the brackets indicate the number of patients showing a particular perturbation (in KICH) or the classification of HR and LR patients. LR: Low Risk of cancer related death. HR: High Risk of cancer related death. ** Protein nodes having the highest number of edgetic perturbations. Note: All corresponding Survival analysis plots for each of the multi-gene biomarkers are available in Su…

## Sheet: Supplementary Table IVb
Supplementary Table IVb: Proteins involved in subtype and subtype specific edgetic perturbations (SubtypePercLost and SubtypePercGained) in 11 cancer types.
Cancer type	Cancer Subtype and ratio of samples showing a specific perturbation
BRCA	PR+ top gains	PR+ top losses	ER+ top gains	ER+ top losses	HER+ top gains	HER+ top losses	PR- top gains	PR- top losses CFTR(29/29)	ER- top gains IGF2BP3*(20/20)	ER- top losses	HER- top gains CDC25C* (76/76)	HER- top losses NOS2 (76/76)
	CDC25C* (61/61)	NOS* (61/61)	CDC25C* (70/70)	NOS2 (70/70)	HIST1H3A, IGF2BP3*(13/13)	CFTR (13/13)	IGF2BP3*(29/29)			CFTR (20/20)
	PR+ specific gains PARVG* (24/61)	PR+ specific losses XPO4*(21/61)	ER+ specific gains SPATS* (3/70)	ER+ specific losses PIH1D2* (5/70)	HER+ specific gains (0)	HER+ specific losses ATP6V1B1* (2/13)	PR- specific gains CORO6* (2/29)	PR- specific losses PTN* (2/29)	ER- specific gains GTPBP2* (2/20)	ER- specific losses YAF2* (2/20)	HER- specific gains PTPRN2*(33/76)	HER- specific losses AMY1A(22/76)
PRAD	SPOP top gains HIST2H3A*	ERG top gains	Others top gains	SPOP top losses TNF* (6/6)	Others top losses	ERG top losses
	(6/6)	CENPA* (22/22)	HIST2H3A* (12/12)		CACNA1A* (12/12)	CACNA1A* (22/22)
	SPOP specific gains TRIM5* (3/6)	ERG specific gains	Others specific gains ADAM2* (9/12)	SPOP specific losses	Others specific losses KCNA4-KCNA5 (8/12)	ERG specific losses
		ADAM2* (21/22)		COL2A1* (4/6)		MYL1* (11/22)
HNSC	Atypical top gains IGF2BP1* (6/6)	Mesenchymal top gains	Basal top gains FOXL2*	Classical top gains IGF2BP1*	Atypical top losses GDF9*	Basal top losses GDF9*	Classical top losses GDF9*	Mesenchymal top losses GDF9* (7/8)
		IGF2BP1* (8/8)	(10/10)	(13/13)	(6/6, 100%)	(10/10)	(13/13)
	Atypical specific gains	Mesenchymal specific gains	Basal specific gains	Classical specific gains FGF19-FGFR4,	Atypical specific losses	Mesenchymal specific losses	Basal specific losses	Classical specific losses
	FEZF1-GABRR1 (5/6)	CSAG1* (7/8)	CSAG1*	KHDRBS1-DLG2 (11/13)	PRG2* (5/6,)	F12* (7/8)	PAK5* (9/10)	ADIPOQ* (9/13)
			(9/10)
KIRC	Cluster 1 top gains	Cluster 2 top gains	Cluster 3 top gains	Cluster 4 top gains CDKN2A* (21/21)	Cluster 1 top losses	Cluster 2 top losses	Cluster 3 top losses ESRRB* (15/15)	Cluster 4 top losses
	CDKN2A* (16/16)	CDKN2A* (16/16)	TP73*		ESRRB* (16/16)	ESRRB* (16/16)		ESRRB* (21/21)
			(15/15)
	Cluster 1 specific gains	Cluster 2 specific gains RUFY4* (10/16)	Cluster 3	Cluster 4 specific gains	Cluster 1 specific losses	Cluster 2 specific losses F8-VWF, EWSR1-SLC22A24	Cluster 3 specific losses	Cluster 4 specific losses
	GRIA4*,		MKL2* (5/15)	PLA2G12B* (10/21)	AFP-PHB2 (9/16)	(10/16)	FHL3-FHL2	EZH2-TDRD1
	KHDRBS1-DLG2						(8/15)	(9/21)
	(7/16)
LUSC	Secretory top gains HIST1H2AB*	Classical top gains	Basal top gains	Primitive top gains	Secretory top losses NTRK1*	Classical top losses	Basal top losses	Primitive top losses
	(5/5)	HIST1H2AB* (7/7)	RPS17* (2/2)	GNAS* (2/2)	(5/5)	GDF9* (7/7)	NTRK1* (2/2)	NTRK1* (2/2)
	Secretory specific gains PAEP* (5/5)	Classical specific gains	Basal specific gains	Primitive specific gains	Secretory specific losses	Classical specific losses	Basal specific losses	Primitive specific losses
		MPPED1* (7/7)	RPS17* (2/2)	HEPACAM2* (2/2)	CCDC33* (5/5)	CYP1A1*(7/7)	VIM* (2/2)	POU2F11* (2/2)
LUAD	TRU top gains CACNA1A* (15/15)	PP top gains SGO1* (9/9)	PI top gains	TRU top losses APOA1*	PP top losses APOA1*	PI top losses APOA1*
			GFAP*	(15/15)	(9/9)	(21/21)
			(21/21)
	TRU specific gains AMBP-FHL3 (6/15)	PP specific gains	PI specific gains	TRU specific losses BCAR3* (9/15)	PP specific losses	PI specific losses POLE2-KLK5 (12/21)
		PTTG1-NT5M,	MAST4-SMAD1		MCOLN3-ST7L (7/9)
		POU2F1-HOXB13	(12/21)
		(5/9)
STES	MSI top gains TNFSF11* (16/16)	MSS top gains FOXH1* (21/21)	MSI top losses SCN2B*	MSS top losses SCN2B*
			(16/16)	(21/21)
	MSI specific gains KLF8* (7/16)	MSS specific gains	MSI specific losses SCGB3A1* (9/16)	MSS specific losses NAV2* (10/21)
		APOC3* (11/21)
KIRP	Type 1 top gains TP73*, IGF2BP3* (7/7)	Type 2 top gains IGF2BP3*, CENPA* (16/16)	Type 1 top losses	Type 2 top losses NROB2* (16/16)
			CYP1A1* (7/7)
	Type 1 specific gains PRKCG* (5/7)	Type 2 specific gains CERS1*	Type 1 specific losses KCNG*	Type 2 specific losses TDRD1*
		(13/16)	(6/7)	(12/16)
THCA	BRAF-like top gains	RAS-like top gains	BRAF-like top losses	RAS-like top losses LYPD6* (12/12)
	KRT15*, ALK*	ALK*, FATE1* (12/12)	KRT85*
	(34/34)		(34/34)
	BRAF-like specific gains FTR-ADCY8 (31/34)	RAS-like specific gains	BRAF-like specific losses ODAM* (29/34)	RAS-like specific losses JAKMIP2* (8/12)
		KLK7* (4/12)
* Nodes with more than 2 edges perturbed.
