# Supplementary material for: Edgetic perturbation signatures represent known and novel cancer biomarkers
Source: Sci Rep. 2020 Mar 9;10:4350. doi: 10.1038/s41598-020-61422-3 (PMC7062722; doi:10.1038/s41598-020-61422-3)
Supplement: Supplementary file 6 — Table S5. [file 41598_2020_61422_MOESM6_ESM.xlsx]

## Sheet: Supplementary Table V
Supplementary Table V: Characteristics of healthy and cancer PPINs and associated perturbations in 13 cancer types.
Cancer type	Total number of gained edges	Number of cancer-specific gained edges	Total number of lost edges	Number of cancer-specific lost edges	Healthy PPIN size	Cancer PPIN size	p-valuea
THCA	22831	1271	28065	797	175910	177146	2.71e-06
BLCA	20739	1463	19030	202	174770	175289	-
BRCA	22195	1453	25516	712	177033	174658	9.76e-16
COAD	10065	566	21024	953	180365	172933	1.49e-09
KIRC	18258	462	33005	887	179887	176147	8.83e-14
KIRP	17174	1085	27141	1117	178740	178300	-
KICH	12423	627	27490	1402	182708	176236	2.98e-08
HNSC	21913	1027	27485	877	181819	177203	1.92e-11
LUAD	16622	959	21907	259	177980	176455	1.93e-08
PRAD	17529	684	22468	915	179710	177677	3.97e-08
LUSC	13108	644	23242	1049	181377	175758	2.65e-10
STES	24326	1215	20800	835	177110	174708	1.92e-11
LIHC	36458	2019	51445	4068	175831	174337	0.004
	a) The dash sign (-) indicates that there is no significant difference between healthy and cancer PPINs.
