# Supplementary material for: Edgetic perturbation signatures represent known and novel cancer biomarkers
Source: Sci Rep. 2020 Mar 9;10:4350. doi: 10.1038/s41598-020-61422-3 (PMC7062722; doi:10.1038/s41598-020-61422-3)
Supplement: Supplementary file 7 — Table S6. [file 41598_2020_61422_MOESM7_ESM.xlsx]

## Sheet: GO_GAINS_RAW
Supplementary Table VIa: Enriched molecular functions for proteins involved in egdetic gains prior to REVIGO pruning
MOLECULAR FUNCTIONS
GO.ID	P-value
GO:0005515	< 1e-30
GO:0003723	< 1e-30
GO:0031625	< 1e-30
GO:0045296	< 1e-30
GO:0005524	1.3e-25
GO:0042802	1.1e-22
GO:0003682	7.3e-21
GO:0019901	3.1e-20
GO:0019904	3.9e-20
GO:0008022	2.1e-17
GO:0008134	6.7e-14
GO:0003713	1.7e-12
GO:0003735	2.8e-12
GO:0050681	2.4e-11
GO:0046982	1.6e-10
GO:0019899	6.4e-10
GO:0043130	8.5e-10
GO:0042393	3.4e-09
GO:0030621	6.5e-09
GO:0061630	1.7e-08
GO:0003714	2.7e-08
GO:0004674	2.8e-08
GO:0005080	3.2e-08
GO:0017070	3.7e-08
GO:0005200	5.3e-08
GO:0001784	5.3e-08
GO:0002039	6.4e-08
GO:0042826	1e-07
GO:0030374	1.2e-07
GO:0000980	1.3e-07
GO:0004712	1.7e-07
GO:0043021	1.8e-07
GO:0042803	2.6e-07
GO:0000978	2.8e-07
GO:0061631	2.9e-07
GO:0004715	3e-07
GO:0051015	4.4e-07
GO:0003729	5.9e-07
GO:1990841	6.6e-07
GO:0047485	7.8e-07
GO:0031690	1.1e-06
GO:0001085	1.2e-06
GO:1990381	1.4e-06
GO:0019843	1.7e-06
GO:0001102	1.8e-06
GO:0030165	1.8e-06
GO:0004843	1.8e-06
GO:0019902	2e-06
GO:0051087	2.2e-06
GO:0043531	3.3e-06
GO:0048156	3.5e-06
GO:0044212	3.6e-06
GO:0004402	5.8e-06
GO:0001105	7.8e-06
GO:0030674	8e-06
GO:0019903	9e-06
GO:0003743	1.2e-05
GO:0008094	1.3e-05
GO:0004693	1.3e-05
GO:0051721	1.3e-05
GO:0003924	1.3e-05
GO:0070182	1.4e-05
GO:0031492	1.4e-05
GO:0003727	1.7e-05
GO:0070411	2.1e-05
GO:0030622	2.1e-05
GO:0051082	2.3e-05
GO:0097110	2.7e-05
GO:0070742	3e-05
GO:0001054	3.4e-05
GO:0008139	3.7e-05
GO:0008013	4.6e-05
GO:0008536	4.7e-05
GO:0048027	4.9e-05
GO:0031593	5.8e-05
GO:0004702	5.9e-05
GO:0070491	6.8e-05
GO:0051879	7.2e-05
GO:0035173	7.4e-05
GO:0001104	7.4e-05
GO:0043008	7.5e-05
GO:0003688	7.5e-05
GO:0008017	8.8e-05
GO:0005516	8.9e-05
GO:0051019	0.0001
GO:0005072	0.00013
GO:0046976	0.00013
GO:0042169	0.00013
GO:0046966	0.00013
GO:0070412	0.00015
GO:0048487	0.00015
GO:0070990	0.00016
GO:0032947	0.00016
GO:0000979	0.00017
GO:0001046	0.00017
GO:0001076	0.00017
GO:0017124	0.00019
GO:0005057	0.0002
GO:0019900	0.00023
GO:0043425	0.00025
GO:0035255	0.00025
GO:0046875	0.00025
GO:0042605	0.00026
GO:0001077	0.00027
GO:0051787	0.00028
GO:0005070	0.00032
GO:0035064	0.00034
GO:0004386	0.00034
GO:0042809	0.00035
GO:0047035	0.00039
GO:0001158	0.00044
GO:0004407	0.00046
GO:0004683	0.00047
GO:0031490	0.0005
GO:0030544	0.00052
GO:0017022	0.00055
GO:0035198	0.00056
GO:0043022	0.00056
GO:0032183	0.00057
GO:0017137	0.00062
GO:0044877	0.00064
GO:0008270	0.00073
GO:0001047	0.00073
GO:0070975	0.00076
GO:0019784	0.00076
GO:0046980	0.00076
GO:0097027	0.00076
GO:0016403	0.00076
GO:0030983	0.00081
GO:1904264	0.00081
GO:0070064	0.00081
GO:0004004	0.00085
GO:0031996	0.00088
GO:0000990	0.00088
GO:0000989	0.0009
GO:0050750	0.00107
GO:0008143	0.00116
GO:0051117	0.00124
GO:0030332	0.00127
GO:0003725	0.00134
GO:0070888	0.00139
GO:0004713	0.0015
GO:0044325	0.00158
GO:0050321	0.00158
GO:0004861	0.00158
GO:0034450	0.00158
GO:0097718	0.0016
GO:0030331	0.00169
GO:0003746	0.00179
GO:0051020	0.00181
GO:0031821	0.00187
GO:0047025	0.00187
GO:0030109	0.00187
GO:0030235	0.00187
GO:0097322	0.00187
GO:0016435	0.00187
GO:0045309	0.00193
GO:0033613	0.00194
GO:0046974	0.00197
GO:0045294	0.00197
GO:0098505	0.00197
GO:0001164	0.00197
GO:0043015	0.002
GO:0000993	0.002
GO:0003697	0.00218
GO:0017016	0.00219
GO:0034236	0.00234
GO:0035259	0.00234
GO:0015440	0.00243
GO:0018024	0.0027
GO:0000981	0.00294
GO:0017136	0.00308
GO:0008327	0.00308
GO:0052650	0.00308
GO:0017025	0.00314
GO:0005525	0.00321
GO:0008093	0.00332
GO:0070410	0.00332
GO:0005165	0.00332
GO:0043560	0.00332
GO:0003680	0.00332
GO:0008565	0.00351
GO:0001223	0.00378
GO:0031491	0.00431
GO:0017162	0.00438
GO:0035251	0.00438
GO:0016886	0.00438
GO:0036002	0.0044
GO:0016922	0.00441
GO:0023029	0.00441
GO:0070628	0.00441
GO:1990948	0.00459
GO:0031748	0.00459
GO:0034513	0.00459
GO:1990254	0.00459
GO:0010997	0.00459
GO:0044390	0.00465
GO:1901338	0.00466
GO:0032794	0.00466
GO:0005159	0.00466
GO:0005528	0.00466
GO:0019199	0.00481
GO:0070034	0.00496
GO:0001882	0.00567
GO:0004722	0.00587
GO:0046965	0.00588
GO:0046933	0.00588
GO:1990837	0.00618
GO:0001103	0.00619
GO:0031369	0.00647
GO:0001205	0.00647
GO:0045182	0.00666
GO:0004812	0.00666
GO:0003684	0.0067
GO:0046332	0.00684
GO:0003678	0.00686
GO:0005536	0.00688
GO:0061608	0.00688
GO:0008092	0.0069
GO:0019789	0.00696
GO:0097602	0.00696
GO:0047144	0.00696
GO:0042805	0.00712
GO:0048185	0.00912
GO:0052743	0.00912
GO:0000213	0.00912
GO:0043522	0.00912
GO:0004385	0.00912
GO:0035615	0.00912
GO:0030515	0.00923
GO:0008187	0.00928
GO:0032356	0.00963
GO:0038062	0.00963
GO:0000340	0.00963
GO:0051920	0.00963
GO:0035256	0.00963
GO:0042162	0.00971
GO:0019783	0.00982
GO:0035035	0.01019
GO:0051059	0.01019
GO:0015459	0.01045
GO:0000982	0.01047
GO:0042287	0.01076
GO:0001098	0.01092
GO:0001099	0.01092
GO:0001091	0.01103
GO:0043426	0.01127
GO:0031802	0.01127
GO:0031694	0.01127
GO:0004689	0.01127
GO:0008379	0.01127
GO:0000268	0.01127
GO:0044388	0.01127
GO:0051380	0.01127
GO:0070883	0.01127
GO:0097100	0.01127
GO:0097109	0.01127
GO:0030618	0.01127
GO:0034485	0.01127
GO:0033592	0.01127
GO:0003730	0.01171
GO:0030234	0.01191
GO:0048365	0.01245
GO:0016538	0.0125
GO:0004675	0.01259
GO:0031489	0.01259
GO:0048306	0.01282
GO:0034237	0.01384
GO:0001228	0.01386
GO:0000287	0.01401
GO:0034713	0.01402
GO:0042975	0.01402
GO:0030020	0.01402
GO:0070016	0.01402
GO:0036459	0.01441
GO:0017160	0.01482
GO:0005158	0.01482
GO:0101005	0.01511
GO:0046977	0.01648
GO:0043027	0.01649
GO:0004532	0.01679
GO:0005154	0.01686
GO:0086008	0.01755
GO:0043422	0.01755
GO:0097617	0.01755
GO:0001227	0.01955
GO:0005092	0.02028
GO:0005041	0.02028
GO:0003857	0.02028
GO:0050998	0.02028
GO:0032357	0.02092
GO:0019798	0.02092
GO:0003909	0.02092
GO:0034594	0.02092
GO:0005167	0.02092
GO:0050815	0.02092
GO:0035184	0.02092
GO:0035240	0.02092
GO:0035242	0.02092
GO:0003696	0.02092
GO:0003712	0.02107
GO:0002020	0.02191
GO:0001190	0.02198
GO:0000400	0.02235
GO:0001191	0.02289
GO:0019207	0.02289
GO:0000149	0.02314
GO:0019894	0.02347
GO:0098641	0.02386
GO:0004003	0.02456
GO:0001078	0.02468
GO:0034185	0.02492
GO:0051219	0.02528
GO:0000983	0.02604
GO:0099106	0.02762
GO:0070039	0.02764
GO:0005030	0.02764
GO:0086089	0.02764
GO:0004711	0.02764
GO:0010484	0.02764
GO:0099609	0.02764
GO:0031749	0.02764
GO:0048408	0.02764
GO:0048763	0.02764
GO:0004656	0.02764
GO:0031697	0.02764
GO:0097016	0.02764
GO:0044323	0.02764
GO:0034648	0.02764
GO:0070137	0.02764
GO:0070139	0.02764
GO:0008428	0.02764
GO:0001025	0.02764
GO:1904288	0.02764
GO:0005219	0.02764
GO:0043532	0.02764
GO:0017018	0.02764
GO:0001156	0.02764
GO:0015056	0.02764
GO:0002162	0.02803
GO:0001055	0.02803
GO:0035197	0.02803
GO:1990825	0.02803
GO:0032813	0.02936
GO:0019905	0.03133
GO:0051287	0.03177
GO:0016874	0.03195
GO:0016247	0.03218
GO:0042054	0.03259
GO:0017166	0.03306
GO:0008097	0.03306
GO:0050786	0.03306
GO:0031078	0.03306
GO:0052659	0.03306
GO:0032041	0.03306
GO:0003755	0.03501
GO:0051010	0.03651
GO:0031005	0.03651
GO:0070679	0.03651
GO:0034452	0.03651
GO:0001012	0.03709
GO:0016896	0.03799
GO:0005164	0.03863
GO:0004707	0.0388
GO:0004708	0.0388
GO:0043274	0.0388
GO:0043024	0.0388
GO:0005521	0.0388
GO:0035613	0.0388
GO:0001106	0.03889
GO:0042800	0.04023
GO:0030228	0.04023
GO:0004303	0.04023
GO:0008574	0.04039
GO:0070063	0.04051
GO:0005048	0.04083
GO:0030159	0.04093
GO:0017056	0.04093
GO:0003779	0.041
GO:0031683	0.04102
GO:0000976	0.04193
GO:0005198	0.04418
GO:0030275	0.04451
GO:0000977	0.04453
GO:0019237	0.04464
GO:0045159	0.04464
GO:0003910	0.04464
GO:0048273	0.04464
GO:0001083	0.04464
GO:0005168	0.04464
GO:0001042	0.04464
GO:0035174	0.04464
GO:0052658	0.04464
GO:1990763	0.04464
GO:0004985	0.04464
GO:0097371	0.04464
GO:0050543	0.04464
GO:0050693	0.04464
GO:0019958	0.04464
GO:0000995	0.04464
GO:0016812	0.04464
GO:0043028	0.04499
GO:0050839	0.04532
GO:1990782	0.04599
GO:0000049	0.04861
GO:0004714	0.04978
GO:0016504	0.05022
GO:0030276	0.05028
GO:0003690	0.05059
GO:0070003	0.05203
GO:0042288	0.05203
GO:0004298	0.05203
GO:0051018	0.05341
GO:0032549	0.05374
GO:0005487	0.05459
GO:0017151	0.05476
GO:0005049	0.05476
GO:0008035	0.05476
GO:0004703	0.05476
GO:0004887	0.05476
GO:0031681	0.05476
GO:0070404	0.05476
GO:0008469	0.05476
GO:0008432	0.05476
GO:0005113	0.05476
GO:1990247	0.05476
GO:0051379	0.05476
GO:0071936	0.05476
GO:1902282	0.05476
GO:0004439	0.05476
GO:0098632	0.0575
GO:0019887	0.05834
GO:0017048	0.05919
GO:0043014	0.05928
GO:0016597	0.05975
GO:0019209	0.0604
GO:0042974	0.06047
GO:0043121	0.06072
GO:0004576	0.06072
GO:0001094	0.06072
GO:0001075	0.06072
GO:0004935	0.06072
GO:0097157	0.06072
GO:0046978	0.06099
GO:0003705	0.06197
GO:0046983	0.06252
GO:0051537	0.06258
GO:0016829	0.06331
GO:0000146	0.06401
GO:0030957	0.06407
GO:0008349	0.06407
GO:0030898	0.06407
GO:0106019	0.06407
GO:0016273	0.06407
GO:0016274	0.06407
GO:0001134	0.06407
GO:0005251	0.06517
GO:0008266	0.06517
GO:0003756	0.06517
GO:0016864	0.06517
GO:0016859	0.06519
GO:0008144	0.06525
GO:0004535	0.06572
GO:0034595	0.06572
GO:0004697	0.06597
GO:0008301	0.06597
GO:0001056	0.06623
GO:0005123	0.06623
GO:0031435	0.06623
GO:0043398	0.06779
GO:0004774	0.06779
GO:0004775	0.06779
GO:0004727	0.06779
GO:1903135	0.06779
GO:0031720	0.06779
GO:1904928	0.06779
GO:0034739	0.06779
GO:0031826	0.06779
GO:0043120	0.06779
GO:0099077	0.06779
GO:0004534	0.06779
GO:0032137	0.06779
GO:0031692	0.06779
GO:0004634	0.06779
GO:0005471	0.06779
GO:0052812	0.06779
GO:0001093	0.06779
GO:0032795	0.06779
GO:0008426	0.06779
GO:0098518	0.06779
GO:0005166	0.06779
GO:0005119	0.06779
GO:0015207	0.06779
GO:0004013	0.06779
GO:0050816	0.06779
GO:0042954	0.06779
GO:0071074	0.06779
GO:0042903	0.06779
GO:0032564	0.06779
GO:0004939	0.06779
GO:0032557	0.06779
GO:0032558	0.06779
GO:0019959	0.06779
GO:0048030	0.06779
GO:0061628	0.06779
GO:0003886	0.06779
GO:0061649	0.06779
GO:0004161	0.06779
GO:0035662	0.06779
GO:0001224	0.06779
GO:0070051	0.06779
GO:0047718	0.06779
GO:0016802	0.06779
GO:0060590	0.07382
GO:0016887	0.07395
GO:0005085	0.07458
GO:0052813	0.07767
GO:0030971	0.07883
GO:0004197	0.07937
GO:0000175	0.0801
GO:0051427	0.08034
GO:0032452	0.08673
GO:0030295	0.0868
GO:0005031	0.09014
GO:0005035	0.09014
GO:0016796	0.09061
GO:0061659	0.09073
GO:0010385	0.09312
GO:0005047	0.09312
GO:0086083	0.09312
GO:0005007	0.09312
GO:0051525	0.09312
GO:0034711	0.09312
GO:0004826	0.09312
GO:0032405	0.09312
GO:0005324	0.09312
GO:0071532	0.09312
GO:1990446	0.09312
GO:0016929	0.09312
GO:0001030	0.09312
GO:0001031	0.09312
GO:0004046	0.09312
GO:0008142	0.09312
GO:0080084	0.09312
GO:0004952	0.09312
GO:0050544	0.09312
GO:0038132	0.09312
GO:0009008	0.09312
GO:0004396	0.09312
GO:0004340	0.09312
GO:0061665	0.09312
GO:0017134	0.09357
GO:0030145	0.09498
GO:0042813	0.09697
GO:0001671	0.09697
GO:0004970	0.10028
GO:0070035	0.10104
GO:0008026	0.10104
GO:0048029	0.10196
GO:0051393	0.10286
GO:0010485	0.10337
GO:0051428	0.10337
GO:0050780	0.10374
GO:0003964	0.10394
GO:0030346	0.10394
GO:0004691	0.10394
GO:0008312	0.10394
GO:0001016	0.10394
GO:0008199	0.10394
GO:0004030	0.10394
GO:0017002	0.10394
GO:0003720	0.10394
GO:0036402	0.10394
GO:0032050	0.10394
GO:0036094	0.10427
GO:0004867	0.1067
GO:0050699	0.10777
GO:0031543	0.10817
GO:0015433	0.10817
GO:0009931	0.10817
GO:0016595	0.10823
GO:0005024	0.10823
GO:0004579	0.10823
GO:0031545	0.10823
GO:0008429	0.10823
GO:0015279	0.10823
GO:0000774	0.10823
GO:0030619	0.10823
GO:0016742	0.10823
GO:0003691	0.10823
GO:0016832	0.10823
GO:0043495	0.10914
GO:0031701	0.10914
GO:0045295	0.10914
GO:0015271	0.10914
GO:0036041	0.10914
GO:0004954	0.10914
GO:0031072	0.11068
GO:0003777	0.11236
GO:0017147	0.11295
GO:0008135	0.11542
GO:0043236	0.11841
GO:0019003	0.11979
GO:0031406	0.12143
GO:0071889	0.12415
GO:0008307	0.12454
GO:0043621	0.12568
GO:0043565	0.12574
GO:0032451	0.12705
GO:0098631	0.12705
GO:0070851	0.12786
GO:0019956	0.13018
GO:0052742	0.13085
GO:0008408	0.1319
GO:0005102	0.13413
GO:0043177	0.13492
GO:0030291	0.13583
GO:0017111	0.13615
GO:0000217	0.13653
GO:0017075	0.13653
GO:0017112	0.1385
GO:0004879	0.1385
GO:0098531	0.1385
GO:0003774	0.13998
GO:0017069	0.14733
GO:0005178	0.14984
GO:0071837	0.15013
GO:0003899	0.15462
GO:0061134	0.15471
GO:0060589	0.15473
GO:0043548	0.15594
GO:0046934	0.15627
GO:0030546	0.15734
GO:0001159	0.15936
GO:0000987	0.15936
GO:0035326	0.1613
GO:0071813	0.16444
GO:0071814	0.16444
GO:0010181	0.16476
GO:0043142	0.16476
GO:0005388	0.16476
GO:0010857	0.16476
GO:0001785	0.16628
GO:0005052	0.16628
GO:0001729	0.16628
GO:0004793	0.16628
GO:0001735	0.16628
GO:0016524	0.16628
GO:0004776	0.16628
GO:0005006	0.16628
GO:0031762	0.16628
GO:0031753	0.16628
GO:0031755	0.16628
GO:0071791	0.16628
GO:0010465	0.16628
GO:0071796	0.16628
GO:1990932	0.16628
GO:0001884	0.16628
GO:0045155	0.16628
GO:0001888	0.16628
GO:0019785	0.16628
GO:0046969	0.16628
GO:0046970	0.16628
GO:0038052	0.16628
GO:0004873	0.16628
GO:0001591	0.16628
GO:0004821	0.16628
GO:0016603	0.16628
GO:0004827	0.16628
GO:0004815	0.16628
GO:0030395	0.16628
GO:0004819	0.16628
GO:0038049	0.16628
GO:0004831	0.16628
GO:0050405	0.16628
GO:0060698	0.16628
GO:0002134	0.16628
GO:0047620	0.16628
GO:0003918	0.16628
GO:0004516	0.16628
GO:0098770	0.16628
GO:0032129	0.16628
GO:0001626	0.16628
GO:0032143	0.16628
GO:0042610	0.16628
GO:0004651	0.16628
GO:0031691	0.16628
GO:0031696	0.16628
GO:0031699	0.16628
GO:0034512	0.16628
GO:0016005	0.16628
GO:1904455	0.16628
GO:0004611	0.16628
GO:0004613	0.16628
GO:0004615	0.16628
GO:0004641	0.16628
GO:0004644	0.16628
GO:0004637	0.16628
GO:0008311	0.16628
GO:0015140	0.16628
GO:0015130	0.16628
GO:0098808	0.16628
GO:0070180	0.16628
GO:0052810	0.16628
GO:0052816	0.16628
GO:0052817	0.16628
GO:0030107	0.16628
GO:0008466	0.16628
GO:0034647	0.16628
GO:0047006	0.16628
GO:0051990	0.16628
GO:0045550	0.16628
GO:0005169	0.16628
GO:0005153	0.16628
GO:0045523	0.16628
GO:0045519	0.16628
GO:0001002	0.16628
GO:0001003	0.16628
GO:0047963	0.16628
GO:0004087	0.16628
GO:0004088	0.16628
GO:0035402	0.16628
GO:0035403	0.16628
GO:1990259	0.16628
GO:0005136	0.16628
GO:0036009	0.16628
GO:0008176	0.16628
GO:0008124	0.16628
GO:0016362	0.16628
GO:0061752	0.16628
GO:0034057	0.16628
GO:0097363	0.16628
GO:0004963	0.16628
GO:0004956	0.16628
GO:0080023	0.16628
GO:0008260	0.16628
GO:0004918	0.16628
GO:0032551	0.16628
GO:0017098	0.16628
GO:0016418	0.16628
GO:0033149	0.16628
GO:0034986	0.16628
GO:0034988	0.16628
GO:0019912	0.16628
GO:0070853	0.16628
GO:0047322	0.16628
GO:0019948	0.16628
GO:0072545	0.16628
GO:1904854	0.16628
GO:0016150	0.16628
GO:0008732	0.16628
GO:0004357	0.16628
GO:0061547	0.16628
GO:0004372	0.16628
GO:0004373	0.16628
GO:0102751	0.16628
GO:0004315	0.16628
GO:0061505	0.16628
GO:0004347	0.16628
GO:0004337	0.16628
GO:0030623	0.16628
GO:0070699	0.16628
GO:0047150	0.16628
GO:0003883	0.16628
GO:0030617	0.16628
GO:0003870	0.16628
GO:0016230	0.16628
GO:0004482	0.16628
GO:0004485	0.16628
GO:0001181	0.16628
GO:0008534	0.16628
GO:0033857	0.16628
GO:0016743	0.16628
GO:0016749	0.16628
GO:0004140	0.16628
GO:0031177	0.16628
GO:0140031	0.16628
GO:0000991	0.16628
GO:0000992	0.16628
GO:0001225	0.16628
GO:0051717	0.16628
GO:0047787	0.16628
GO:0070026	0.16628
GO:0016248	0.16901
GO:0032934	0.16918
GO:0032403	0.17004
GO:0046030	0.17224
GO:0030280	0.17224
GO:0015643	0.17224
GO:0032036	0.17224
GO:0004709	0.17357
GO:0016835	0.17536
GO:0070279	0.1756
GO:0016903	0.17812
GO:0016620	0.17827
GO:0031624	0.17827
GO:0034061	0.17827
GO:0003841	0.17827
GO:0004716	0.17949
GO:0031702	0.17949
GO:0000182	0.17949
GO:0008296	0.17949
GO:0004955	0.17949
GO:0033170	0.17949
GO:0070513	0.17949
GO:0005522	0.17949
GO:0003689	0.17949
GO:0070840	0.1834
GO:0015035	0.1834
GO:0140097	0.18485
GO:0043175	0.18516
GO:0030911	0.18591
GO:0004726	0.18591
GO:0032453	0.18591
GO:0032404	0.18591
GO:1990459	0.18591
GO:0042609	0.18591
GO:0031628	0.18591
GO:0015205	0.18591
GO:0070878	0.18591
GO:0015556	0.18591
GO:0008603	0.18591
GO:0035004	0.1862
GO:0098847	0.18793
GO:0033695	0.18826
GO:1904047	0.18826
GO:0005025	0.18826
GO:0004719	0.18826
GO:0004735	0.18826
GO:0044020	0.18826
GO:0038085	0.18826
GO:0031852	0.18826
GO:0030375	0.18826
GO:0047696	0.18826
GO:0034875	0.18826
GO:0019834	0.18826
GO:0032184	0.18826
GO:0050254	0.18826
GO:0004663	0.18826
GO:0031698	0.18826
GO:0071535	0.18826
GO:0004687	0.18826
GO:0015183	0.18826
GO:0051021	0.18826
GO:0034617	0.18826
GO:0010861	0.18826
GO:0102343	0.18826
GO:0102344	0.18826
GO:0102345	0.18826
GO:0001026	0.18826
GO:0036033	0.18826
GO:0005134	0.18826
GO:0031014	0.18826
GO:0034056	0.18826
GO:0016314	0.18826
GO:0004994	0.18826
GO:0102158	0.18826
GO:0004971	0.18826
GO:0032554	0.18826
GO:0071987	0.18826
GO:0018812	0.18826
GO:0070815	0.18826
GO:0051425	0.18826
GO:0004311	0.18826
GO:0008865	0.18826
GO:0035877	0.18826
GO:0015616	0.18826
GO:0070697	0.18826
GO:0001129	0.18826
GO:0001132	0.18826
GO:0004176	0.18826
GO:0042296	0.18826
GO:0034191	0.18826
GO:0019158	0.18826
GO:0032395	0.18923
GO:0005507	0.18923
GO:1903136	0.1901
GO:0004704	0.1901
GO:0048406	0.1901
GO:0019788	0.1901
GO:0002151	0.1901
GO:0003958	0.1901
GO:0043140	0.1901
GO:0005345	0.1901
GO:0034511	0.1901
GO:0098821	0.1901
GO:1990405	0.1901
GO:0015288	0.1901
GO:0001007	0.1901
GO:0004075	0.1901
GO:1990226	0.1901
GO:0043515	0.1901
GO:0050542	0.1901
GO:0004936	0.1901
GO:0036435	0.1901
GO:0004445	0.1901
GO:0034190	0.1901
GO:0070087	0.1901
GO:0005546	0.19254
GO:0005086	0.19401
GO:0005088	0.2012
GO:1990939	0.20432
GO:0005234	0.20552
GO:0005537	0.20552
GO:0005547	0.20875
GO:0001221	0.21716
GO:0004033	0.21718
GO:0008329	0.21806
GO:0098599	0.21806
GO:0008474	0.21806
GO:0038187	0.21806
GO:0030170	0.21935
GO:0008200	0.22047
GO:0033293	0.22202
GO:0051540	0.22363
GO:0051536	0.22363
GO:0005095	0.23181
GO:0055102	0.23181
GO:0005161	0.23181
GO:0005523	0.23181
GO:0019888	0.23326
GO:0043178	0.23464
GO:0016303	0.23908
GO:1901981	0.24473
GO:0034062	0.24487
GO:0097747	0.24487
GO:0004832	0.24698
GO:0015245	0.24698
GO:0015037	0.24698
GO:0030742	0.25149
GO:0005484	0.25231
GO:0015662	0.25231
GO:0050840	0.25685
GO:0016830	0.25685
GO:0061135	0.25723
GO:0015631	0.25872
GO:0005543	0.26368
GO:0048407	0.2639
GO:0035325	0.2639
GO:0033130	0.2639
GO:0016208	0.2639
GO:0016868	0.2639
GO:0001222	0.2639
GO:0016831	0.26651
GO:0019208	0.26699
GO:0031418	0.26786
GO:0004869	0.26968
GO:0140030	0.27161
GO:0003785	0.27736
GO:0005504	0.27736
GO:0004866	0.28166
GO:0017080	0.28177
GO:0019869	0.283
GO:0004690	0.283
GO:0008494	0.283
GO:0015280	0.283
GO:0051400	0.283
GO:0016885	0.283
GO:0005001	0.28599
GO:0001965	0.28599
GO:0030881	0.28599
GO:0019198	0.28599
GO:0004540	0.28608
GO:0098772	0.29756
GO:0030695	0.29814
GO:0001883	0.30193
GO:0070717	0.30424
GO:0008106	0.30429
GO:0071253	0.30497
GO:0051880	0.30497
GO:0010340	0.30497
GO:0005004	0.30497
GO:0008079	0.30497
GO:0016624	0.30497
GO:0046935	0.30497
GO:0019870	0.30497
GO:0003916	0.30497
GO:0004679	0.30497
GO:0008318	0.30497
GO:0035374	0.30497
GO:0051998	0.30497
GO:0030274	0.30497
GO:0005114	0.30497
GO:0004032	0.30497
GO:0008174	0.30497
GO:0034046	0.30497
GO:0004972	0.30497
GO:0016421	0.30497
GO:0036310	0.30497
GO:0003747	0.30497
GO:0031386	0.30497
GO:0030620	0.30497
GO:0030628	0.30497
GO:0001135	0.30497
GO:0016714	0.30497
GO:0004659	0.30627
GO:0017081	0.30627
GO:0031434	0.30627
GO:0044389	0.31015
GO:0070530	0.31391
BIOLOGICAL PROCESSES
GOID	P-value
GO:0016032	< 1e-30
GO:0016579	5.4e-29
GO:0006614	7.5e-27
GO:0006413	1.4e-24
GO:0000184	2.3e-24
GO:0000122	3.5e-23
GO:0019083	6.2e-23
GO:0045944	7.3e-23
GO:0097711	2.2e-19
GO:0051301	1.6e-18
GO:1902036	2.9e-18
GO:0010389	7.4e-15
GO:0050852	7.5e-14
GO:0006364	1.7e-13
GO:0018107	2.7e-13
GO:0051437	4e-13
GO:0018105	4.6e-13
GO:0031145	7.2e-13
GO:0045815	1.1e-12
GO:0045652	1.7e-12
GO:0070317	1.7e-12
GO:0051436	2.1e-12
GO:0006977	2.5e-12
GO:0045893	4.2e-12
GO:0060964	6.1e-12
GO:1901796	9e-12
GO:0030433	2e-11
GO:0030521	8.4e-11
GO:0043066	9.5e-11
GO:0000183	1.3e-10
GO:0006406	1.3e-10
GO:0043161	2.6e-10
GO:0070979	4.2e-10
GO:0038095	5.3e-10
GO:0042795	6e-10
GO:0070498	9.3e-10
GO:0008283	1.1e-09
GO:0000082	1.3e-09
GO:0043488	1.4e-09
GO:1900034	2.1e-09
GO:0016925	2.8e-09
GO:0001701	3.9e-09
GO:0000398	4.5e-09
GO:0070936	4.9e-09
GO:0038096	6.4e-09
GO:0070534	6.8e-09
GO:0061418	1.1e-08
GO:0006457	2.7e-08
GO:0060333	3.9e-08
GO:0006335	4.5e-08
GO:0006367	5.2e-08
GO:0060071	9.3e-08
GO:0090090	1.3e-07
GO:0008285	1.4e-07
GO:0075733	1.6e-07
GO:0006338	1.8e-07
GO:0050821	2e-07
GO:0006369	2e-07
GO:0032922	2.4e-07
GO:0038111	2.5e-07
GO:0001843	2.7e-07
GO:0002479	2.8e-07
GO:0046777	3.7e-07
GO:1904837	3.9e-07
GO:0006368	3.9e-07
GO:0042493	4.5e-07
GO:0043044	5.3e-07
GO:0070301	6e-07
GO:0045471	6.1e-07
GO:0042769	7.7e-07
GO:0002181	7.8e-07
GO:0000060	8.7e-07
GO:0006303	9.3e-07
GO:0050766	9.7e-07
GO:0038083	9.7e-07
GO:0051092	1e-06
GO:0090263	1e-06
GO:0016055	1.1e-06
GO:0070527	1.1e-06
GO:0007346	1.2e-06
GO:0071712	1.2e-06
GO:0019054	1.2e-06
GO:0051290	1.3e-06
GO:0043968	1.3e-06
GO:0046967	1.3e-06
GO:0071550	1.3e-06
GO:0007049	1.3e-06
GO:0048661	1.4e-06
GO:0007062	1.5e-06
GO:0051091	1.8e-06
GO:0050434	1.9e-06
GO:0043967	2e-06
GO:0051225	2e-06
GO:2000036	2.1e-06
GO:0031146	2.2e-06
GO:0006513	2.2e-06
GO:2001244	2.3e-06
GO:0033138	2.5e-06
GO:0016601	2.6e-06
GO:0071377	2.8e-06
GO:0042059	2.8e-06
GO:0043123	3.2e-06
GO:0006325	3.9e-06
GO:0016575	4.3e-06
GO:0008625	5e-06
GO:0071364	5.2e-06
GO:1901224	5.5e-06
GO:0038061	6.5e-06
GO:0051291	6.7e-06
GO:0031124	7.2e-06
GO:0006974	7.3e-06
GO:0042307	7.8e-06
GO:0046784	7.9e-06
GO:1900364	7.9e-06
GO:0051726	7.9e-06
GO:1903078	8.4e-06
GO:0000245	9.1e-06
GO:0002223	1.1e-05
GO:0007050	1.1e-05
GO:0045736	1.2e-05
GO:0031295	1.2e-05
GO:0046827	1.2e-05
GO:0000086	1.3e-05
GO:0043525	1.3e-05
GO:0070987	1.4e-05
GO:1901216	1.4e-05
GO:0043928	1.5e-05
GO:0048010	1.6e-05
GO:0030010	1.6e-05
GO:0045429	2.3e-05
GO:1902187	2.3e-05
GO:0043966	2.4e-05
GO:0032355	2.4e-05
GO:0042542	2.5e-05
GO:0006919	2.5e-05
GO:2000059	2.7e-05
GO:0042127	2.7e-05
GO:0032435	2.8e-05
GO:0006352	2.8e-05
GO:1904874	3e-05
GO:0061077	3.1e-05
GO:0031398	3.1e-05
GO:0010718	3.1e-05
GO:0043388	3.2e-05
GO:0017148	3.2e-05
GO:1904380	3.3e-05
GO:0000289	3.6e-05
GO:0010976	3.6e-05
GO:0048013	3.9e-05
GO:0035329	4.1e-05
GO:0007596	4.2e-05
GO:0048024	4.3e-05
GO:0000715	4.4e-05
GO:0010038	4.4e-05
GO:0048208	4.5e-05
GO:0000209	4.5e-05
GO:0071407	4.8e-05
GO:0001666	4.9e-05
GO:0071276	5.2e-05
GO:0043524	5.2e-05
GO:0034644	5.6e-05
GO:0060544	5.7e-05
GO:0006283	5.7e-05
GO:2000379	6e-05
GO:1990090	6e-05
GO:0010972	6.1e-05
GO:0045892	6.1e-05
GO:0007263	6.2e-05
GO:0000027	6.2e-05
GO:0070734	6.6e-05
GO:0007094	6.7e-05
GO:0006337	6.8e-05
GO:0035518	6.8e-05
GO:0071316	6.9e-05
GO:0000052	6.9e-05
GO:0008284	7.2e-05
GO:0071456	7.3e-05
GO:0045727	7.4e-05
GO:0034614	7.5e-05
GO:0051090	7.7e-05
GO:1900087	7.8e-05
GO:1900740	7.8e-05
GO:0032147	8.7e-05
GO:0051495	8.7e-05
GO:0006521	8.8e-05
GO:0006458	9e-05
GO:0031333	9e-05
GO:1901522	9.1e-05
GO:0000244	9.1e-05
GO:0032436	9.4e-05
GO:0060021	9.4e-05
GO:0031397	9.6e-05
GO:0006383	9.6e-05
GO:0097178	9.8e-05
GO:0010628	0.0001
GO:0030307	0.0001
GO:0007052	0.00011
GO:0030324	0.00011
GO:0030866	0.00011
GO:0000387	0.00012
GO:0009786	0.00012
GO:0071816	0.00012
GO:1990416	0.00012
GO:0000463	0.00012
GO:1903146	0.00012
GO:1904294	0.00012
GO:0006978	0.00012
GO:0042776	0.00012
GO:0035635	0.00012
GO:0006417	0.00012
GO:0006886	0.00012
GO:0051403	0.00012
GO:0035690	0.00013
GO:0006996	0.00013
GO:0001890	0.00013
GO:0097150	0.00013
GO:0035902	0.00013
GO:0000185	0.00013
GO:0035019	0.00013
GO:0007569	0.00014
GO:0021987	0.00014
GO:0032091	0.00014
GO:0032508	0.00014
GO:0016233	0.00014
GO:0071732	0.00015
GO:0071803	0.00015
GO:0042921	0.00015
GO:0022618	0.00015
GO:0072425	0.00016
GO:0007179	0.00016
GO:1903320	0.00016
GO:0042981	0.00018
GO:0030335	0.00018
GO:0043312	0.00018
GO:0000077	0.00018
GO:0031503	0.00019
GO:0016567	0.0002
GO:0001570	0.00021
GO:0042147	0.00022
GO:0061024	0.00023
GO:0001541	0.00025
GO:0042771	0.00025
GO:0000281	0.00025
GO:1990000	0.00025
GO:0000028	0.00025
GO:0033145	0.00025
GO:0006297	0.00026
GO:0006607	0.00026
GO:0035196	0.00027
GO:0080135	0.00027
GO:0050690	0.00027
GO:0046627	0.00027
GO:0035666	0.00027
GO:0006605	0.00028
GO:0044089	0.00028
GO:0043433	0.00028
GO:0050796	0.00029
GO:0051258	0.00029
GO:1904378	0.00029
GO:2000370	0.00029
GO:0033182	0.00029
GO:0036353	0.00029
GO:1903936	0.00029
GO:1902905	0.0003
GO:0051099	0.0003
GO:0030705	0.00031
GO:0031532	0.00031
GO:0007077	0.00032
GO:0034975	0.00032
GO:0010039	0.00032
GO:0007584	0.00033
GO:0042789	0.00034
GO:0031115	0.00036
GO:0097284	0.00036
GO:0097527	0.00036
GO:1901798	0.00037
GO:0002320	0.00037
GO:0006282	0.00038
GO:0030111	0.00039
GO:0051298	0.0004
GO:0043536	0.00041
GO:0071870	0.00042
GO:0001702	0.00042
GO:0042994	0.00042
GO:0006260	0.00043
GO:0031623	0.00045
GO:0030968	0.00046
GO:0043537	0.00046
GO:0006298	0.00046
GO:0002931	0.00046
GO:0097306	0.00047
GO:0019079	0.00047
GO:0030101	0.00049
GO:1903364	0.00049
GO:0010803	0.0005
GO:0019885	0.0005
GO:2000008	0.0005
GO:0033146	0.0005
GO:0051044	0.00051
GO:0007420	0.00051
GO:0070262	0.00052
GO:0071280	0.00052
GO:0051571	0.00052
GO:0035067	0.00052
GO:1902914	0.00052
GO:0007249	0.00054
GO:0071901	0.00054
GO:0001889	0.00058
GO:0097484	0.00058
GO:0043278	0.00058
GO:0030099	0.0006
GO:0048812	0.00063
GO:0055010	0.00064
GO:0009612	0.00064
GO:0005980	0.00064
GO:0007568	0.00065
GO:0065004	0.00065
GO:0032781	0.00066
GO:0032786	0.00069
GO:0007183	0.00069
GO:0032927	0.00069
GO:0045653	0.00069
GO:0042692	0.00071
GO:0045132	0.00072
GO:0008361	0.00072
GO:0031126	0.00072
GO:1904871	0.00072
GO:0061857	0.00072
GO:2000334	0.00072
GO:0002489	0.00072
GO:1903423	0.00072
GO:0038180	0.00072
GO:0033129	0.00072
GO:0006110	0.00076
GO:0016572	0.00077
GO:0060765	0.00078
GO:0048011	0.00078
GO:0034620	0.00079
GO:0048639	0.0008
GO:0035509	0.00082
GO:0045903	0.00082
GO:0033523	0.00082
GO:0048588	0.00082
GO:0033209	0.00083
GO:0030049	0.00085
GO:0034329	0.00086
GO:0071375	0.00091
GO:0043154	0.00094
GO:0046949	0.00096
GO:0000381	0.00096
GO:0006890	0.00097
GO:0003181	0.00098
GO:1904385	0.00098
GO:0070932	0.00098
GO:0061136	0.00098
GO:0002576	0.00099
GO:0015031	0.00101
GO:0006511	0.00101
GO:0043392	0.00102
GO:0071695	0.00103
GO:0006281	0.00103
GO:0071108	0.00103
GO:0042407	0.00103
GO:0071549	0.00103
GO:0050999	0.00104
GO:0035722	0.00104
GO:0034508	0.00107
GO:0045739	0.00107
GO:2000810	0.00107
GO:0060413	0.00108
GO:0007096	0.00108
GO:0071236	0.00108
GO:0006897	0.00108
GO:0045646	0.00109
GO:0006970	0.0011
GO:0048041	0.00111
GO:0036498	0.00111
GO:0071398	0.00111
GO:0071320	0.00111
GO:0070830	0.00112
GO:0007498	0.00113
GO:0002761	0.00113
GO:0034097	0.00115
GO:0006409	0.00115
GO:0008543	0.00115
GO:0006418	0.00116
GO:0070507	0.00118
GO:0032727	0.00121
GO:0010888	0.00121
GO:1990668	0.00121
GO:0010971	0.00121
GO:0060045	0.00121
GO:0009895	0.00123
GO:0010165	0.00125
GO:2000134	0.00126
GO:0033044	0.00128
GO:0000187	0.00129
GO:0043409	0.00134
GO:0007010	0.00134
GO:0032212	0.00135
GO:2001252	0.0014
GO:0043687	0.00141
GO:0051101	0.00142
GO:0033119	0.00142
GO:0006968	0.00143
GO:0007190	0.00143
GO:0042992	0.00145
GO:0032200	0.00146
GO:0045860	0.00146
GO:0070198	0.00146
GO:0031098	0.00147
GO:0002183	0.00147
GO:0060965	0.00147
GO:0002076	0.00147
GO:1903140	0.00147
GO:0097296	0.00148
GO:0035278	0.00148
GO:0002740	0.00148
GO:0045579	0.00148
GO:0038128	0.0015
GO:0001824	0.00154
GO:0051492	0.00155
GO:2001251	0.00156
GO:0072594	0.00157
GO:0048814	0.00158
GO:0090068	0.00161
GO:0031648	0.00162
GO:0042220	0.00162
GO:0071539	0.00163
GO:0031663	0.00167
GO:0019886	0.00167
GO:0010212	0.00168
GO:0034502	0.00169
GO:0050853	0.0017
GO:0036294	0.0017
GO:0032481	0.0017
GO:1900006	0.00171
GO:1901655	0.00172
GO:1904667	0.00173
GO:0002753	0.00173
GO:0042326	0.00175
GO:1905818	0.00175
GO:0051865	0.00176
GO:0050994	0.00177
GO:0043124	0.00177
GO:0065003	0.00177
GO:0046826	0.00179
GO:0061048	0.00179
GO:1904999	0.00179
GO:1905050	0.00179
GO:0051987	0.00179
GO:0035280	0.00179
GO:2000767	0.00179
GO:2000601	0.00179
GO:0072553	0.00179
GO:0030953	0.00179
GO:0048167	0.00179
GO:0043279	0.00181
GO:0032467	0.00182
GO:0021549	0.00182
GO:0001649	0.00183
GO:0060370	0.00186
GO:0070445	0.00186
GO:1904153	0.00186
GO:0046968	0.00186
GO:0001188	0.00186
GO:0007084	0.00186
GO:1903347	0.00186
GO:0072386	0.00186
GO:0072203	0.00186
GO:0060216	0.00187
GO:0032211	0.00187
GO:0042276	0.00187
GO:2000104	0.00187
GO:0000466	0.00187
GO:0060008	0.00187
GO:0043491	0.00187
GO:0006310	0.00187
GO:0032092	0.00187
GO:1990830	0.00187
GO:0045786	0.00193
GO:0050869	0.00198
GO:0051052	0.00209
GO:0048709	0.00209
GO:0042593	0.0021
GO:0031047	0.0021
GO:0021782	0.00211
GO:0048568	0.00212
GO:0051123	0.00213
GO:0032801	0.00213
GO:0033144	0.00213
GO:0001678	0.00214
GO:0019216	0.00216
GO:0000470	0.00217
GO:0043276	0.00217
GO:0050680	0.00218
GO:0043518	0.00219
GO:0032688	0.00219
GO:0032968	0.00219
GO:0072075	0.00219
GO:0045732	0.0022
GO:0034101	0.00221
GO:0051568	0.00222
GO:1904886	0.00224
GO:0018027	0.00224
GO:0010661	0.00224
GO:0007041	0.00225
GO:1902042	0.00226
GO:0097421	0.00226
GO:0051170	0.00227
GO:0051402	0.00227
GO:0008286	0.00232
GO:0032410	0.00233
GO:0031122	0.00235
GO:0007565	0.00236
GO:0042129	0.00236
GO:0060412	0.00237
GO:0003151	0.00245
GO:0031670	0.00246
GO:0009411	0.00248
GO:0070059	0.00249
GO:0005978	0.00254
GO:0021761	0.00256
GO:0060998	0.00257
GO:0060561	0.00258
GO:0010288	0.00258
GO:0009267	0.00258
GO:0010970	0.00258
GO:1902275	0.00259
GO:0006270	0.0026
GO:0070192	0.0026
GO:0043486	0.00262
GO:0030833	0.00264
GO:0055013	0.00264
GO:0048844	0.00264
GO:0006363	0.00264
GO:0021762	0.00264
GO:0016573	0.00267
GO:0006336	0.0027
GO:0006323	0.00273
GO:2000027	0.00278
GO:0044087	0.00281
GO:0030520	0.00283
GO:0010770	0.00283
GO:0008608	0.00284
GO:2001275	0.00287
GO:0051590	0.00287
GO:0051532	0.00287
GO:0010592	0.00287
GO:0036296	0.00288
GO:0050777	0.00289
GO:0009952	0.00291
GO:0051650	0.00292
GO:0032388	0.00294
GO:0016236	0.00297
GO:0045088	0.00299
GO:0001952	0.00301
GO:0046825	0.00308
GO:2001241	0.00313
GO:0060439	0.00313
GO:0060742	0.00313
GO:0051026	0.00313
GO:0051315	0.00313
GO:0061308	0.00313
GO:0051583	0.00313
GO:0071888	0.00313
GO:0061684	0.00313
GO:0000379	0.00313
GO:0033197	0.00313
GO:0033235	0.00313
GO:0000212	0.00313
GO:1902175	0.00315
GO:0071480	0.00315
GO:0035116	0.00315
GO:0000083	0.00315
GO:0035265	0.00316
GO:1903311	0.00316
GO:0010977	0.00327
GO:0043065	0.00337
GO:0032800	0.00338
GO:0045948	0.00338
GO:0016241	0.00342
GO:0061028	0.00345
GO:0007059	0.00346
GO:0006096	0.00348
GO:0007015	0.00348
GO:0030970	0.00348
GO:0071371	0.00351
GO:1990182	0.00351
GO:1990126	0.00351
GO:2000637	0.00351
GO:0033158	0.00351
GO:1901380	0.00351
GO:0061041	0.00354
GO:0006306	0.00356
GO:0051028	0.00357
GO:2000177	0.00359
GO:0009749	0.00364
GO:0043266	0.00365
GO:0048511	0.00366
GO:0035270	0.00368
GO:0034405	0.00374
GO:0030513	0.00374
GO:0043620	0.00379
GO:0071230	0.0038
GO:0018108	0.0038
GO:0071345	0.00384
GO:0019941	0.00385
GO:0016239	0.00387
GO:0045742	0.00387
GO:0090049	0.00387
GO:1901215	0.00389
GO:1903829	0.00393
GO:0002833	0.00393
GO:0007212	0.00398
GO:0035418	0.00398
GO:0045667	0.00398
GO:0044003	0.00401
GO:0051094	0.00402
GO:0043200	0.00405
GO:0007257	0.00405
GO:0045746	0.00405
GO:0090311	0.00405
GO:0006361	0.00406
GO:0098586	0.00407
GO:0003300	0.00408
GO:0061154	0.00409
GO:0090181	0.00409
GO:0032273	0.0041
GO:0000070	0.00411
GO:0010501	0.00413
GO:0061912	0.00415
GO:0046599	0.00415
GO:0060795	0.00416
GO:1901253	0.00417
GO:0003266	0.00417
GO:0031442	0.00417
GO:1901671	0.00417
GO:0060559	0.00417
GO:0060534	0.00417
GO:1904851	0.00417
GO:1902018	0.00417
GO:0006924	0.00417
GO:0061314	0.00417
GO:0061302	0.00417
GO:0022417	0.00417
GO:0071672	0.00417
GO:1900242	0.00417
GO:0002634	0.00417
GO:0048755	0.00417
GO:0010918	0.00417
GO:0045814	0.00417
GO:2000045	0.00422
GO:0035195	0.00423
GO:0070374	0.00426
GO:0033047	0.00427
GO:0006887	0.00433
GO:0051220	0.00438
GO:0003188	0.00438
GO:0046831	0.00438
GO:0016973	0.00438
GO:0097067	0.00438
GO:0035020	0.00438
GO:0045416	0.00438
GO:0090266	0.00438
GO:0009299	0.00438
GO:0050810	0.0044
GO:0003175	0.00441
GO:0036265	0.00441
GO:0070478	0.00441
GO:0043987	0.00441
GO:0098914	0.00441
GO:0046645	0.00441
GO:1904683	0.00441
GO:1905323	0.00441
GO:0035093	0.00441
GO:0010265	0.00441
GO:0010571	0.00441
GO:0072738	0.00441
GO:0090166	0.00441
GO:0060261	0.00459
GO:0034453	0.00459
GO:0071166	0.00469
GO:0043627	0.00473
GO:0010942	0.00475
GO:0042254	0.00477
GO:0051338	0.00477
GO:0032609	0.0049
GO:0009408	0.005
GO:0006606	0.00501
GO:1904037	0.00502
GO:0060706	0.00502
GO:0051294	0.00502
GO:0040001	0.00502
GO:0030511	0.00502
GO:0005979	0.00502
GO:0060560	0.00526
GO:0040014	0.00527
GO:0006301	0.00528
GO:0022612	0.00531
GO:1904018	0.00537
GO:0051642	0.00538
GO:0007004	0.0054
GO:0031338	0.00541
GO:1904888	0.00541
GO:0030071	0.00541
GO:0016197	0.00542
GO:0001935	0.0055
GO:0006900	0.00551
GO:0070828	0.00552
GO:0060644	0.00552
GO:0031629	0.00552
GO:1902043	0.00552
GO:0051085	0.00552
GO:0001921	0.00552
GO:0045080	0.00552
GO:0038063	0.00552
GO:0048026	0.00552
GO:2000811	0.00552
GO:0042733	0.00554
GO:0042269	0.00557
GO:0001942	0.00557
GO:0070972	0.0056
GO:0045639	0.00562
GO:0097190	0.00568
GO:0003203	0.00568
GO:0007176	0.00568
GO:0007143	0.00568
GO:2000352	0.00568
GO:0032507	0.00579
GO:0006333	0.0058
GO:0001568	0.00582
GO:2001243	0.00583
GO:0051926	0.00584
GO:0045669	0.00591
GO:0010812	0.00591
GO:0060317	0.00592
GO:0021801	0.00592
GO:0009303	0.00592
GO:0086005	0.00592
GO:0010800	0.00592
GO:0006986	0.00596
GO:0061005	0.00602
GO:0042267	0.00602
GO:0042475	0.00607
GO:2000058	0.0061
GO:0010907	0.00611
GO:0045599	0.00612
GO:0048146	0.00612
GO:0000186	0.00612
GO:1904375	0.0062
GO:0008585	0.00623
GO:0071392	0.00625
GO:1903053	0.00625
GO:0002711	0.00628
GO:1901659	0.00629
GO:0007595	0.00629
GO:2001236	0.00631
GO:0032845	0.00633
GO:0090503	0.00634
GO:0006888	0.00636
GO:0046328	0.00636
GO:0007507	0.0064
GO:0070741	0.0064
GO:0006362	0.0064
GO:0014888	0.00643
GO:0043277	0.00643
GO:0051897	0.00643
GO:1903202	0.00643
GO:0010658	0.00643
GO:0046661	0.00646
GO:0042100	0.00648
GO:0043984	0.00651
GO:0006896	0.00651
GO:0034384	0.00651
GO:0051299	0.00651
GO:0016075	0.00651
GO:0043153	0.00651
GO:0090557	0.00653
GO:0043619	0.00653
GO:0075522	0.00653
GO:0060767	0.00653
GO:0031125	0.00653
GO:0060525	0.00653
GO:0014745	0.00653
GO:0006991	0.00653
GO:0051573	0.00653
GO:0002087	0.00653
GO:0042271	0.00653
GO:1902992	0.00653
GO:1905941	0.00653
GO:0045955	0.00653
GO:0001894	0.00655
GO:0045638	0.00657
GO:0032846	0.00657
GO:0045834	0.00665
GO:0034504	0.00672
GO:0043010	0.00679
GO:0048562	0.00679
GO:0008104	0.0068
GO:0106027	0.00691
GO:0051336	0.00692
GO:0071333	0.00692
GO:0045665	0.00702
GO:0048469	0.00711
GO:0090307	0.00712
GO:0035304	0.00713
GO:0032784	0.00722
GO:0060716	0.00735
GO:0006622	0.00735
GO:0061339	0.00735
GO:0045109	0.00735
GO:2000737	0.00735
GO:2000678	0.00735
GO:0045953	0.00735
GO:0060039	0.00735
GO:0060070	0.00749
GO:0010256	0.0075
GO:0046849	0.00757
GO:0051303	0.00768
GO:0042176	0.0079
GO:0050686	0.00796
GO:0022008	0.008
GO:0006879	0.00801
GO:0035066	0.00801
GO:0034116	0.00805
GO:0032107	0.00805
GO:0032799	0.00805
GO:0009725	0.00813
GO:0006094	0.00814
GO:0001658	0.00823
GO:0002065	0.00829
GO:0033674	0.00834
GO:0031960	0.00835
GO:1901989	0.00836
GO:0043542	0.00842
GO:0051785	0.00844
GO:1903391	0.00844
GO:0030100	0.00848
GO:0034250	0.0085
GO:0007276	0.00851
GO:0007099	0.00855
GO:0031069	0.00862
GO:0016578	0.00862
GO:0006266	0.00862
GO:1902895	0.00862
GO:0032878	0.00862
GO:0000469	0.00862
GO:1903671	0.00862
GO:0014812	0.00863
GO:0060397	0.00863
GO:0060536	0.00863
GO:0071352	0.00863
GO:0042754	0.00863
GO:2000343	0.00863
GO:1900119	0.00863
GO:1900246	0.00863
GO:0032988	0.00863
GO:0090042	0.00863
GO:0072178	0.00863
GO:0060019	0.00863
GO:0060044	0.00863
GO:0045931	0.0087
GO:0016071	0.00871
GO:0051443	0.00886
GO:0032663	0.00886
GO:0018208	0.00886
GO:2000677	0.00898
GO:0044257	0.00903
GO:2001235	0.00904
GO:0006302	0.00904
GO:0046637	0.00906
GO:0006913	0.00906
GO:0006851	0.00907
GO:0001556	0.00907
GO:0051560	0.00907
GO:2000300	0.00907
GO:0010613	0.00907
GO:0048668	0.00907
GO:0033522	0.00912
GO:0048015	0.00917
GO:0071496	0.0092
GO:2001171	0.00923
GO:0060215	0.00923
GO:1904379	0.00923
GO:1901533	0.00923
GO:0031118	0.00923
GO:0046600	0.00923
GO:0034475	0.00923
GO:0034445	0.00923
GO:0006610	0.00923
GO:0001731	0.00923
GO:0006975	0.00923
GO:0031937	0.00923
GO:0044793	0.00923
GO:0007021	0.00923
GO:0007042	0.00923
GO:0007172	0.00923
GO:0071673	0.00923
GO:0032875	0.00923
GO:0035733	0.00923
GO:0002506	0.00923
GO:0072282	0.00923
GO:0085020	0.00923
GO:0000492	0.00923
GO:0060020	0.00923
GO:0090240	0.00923
GO:0075713	0.00923
GO:0036297	0.00925
GO:2000378	0.00925
GO:0007043	0.0093
GO:0048488	0.00934
GO:0007098	0.00934
GO:0002053	0.00941
GO:2000001	0.00941
GO:0046324	0.00946
GO:1905477	0.00946
GO:2001022	0.00947
GO:0071363	0.0095
GO:0006289	0.00958
GO:0009948	0.00958
GO:0035872	0.00958
GO:0048538	0.00958
GO:0051702	0.00961
GO:0033260	0.00965
GO:0001825	0.00966
GO:0042036	0.00966
GO:0042311	0.00966
GO:0030851	0.00966
GO:0008219	0.00976
GO:0043507	0.00979
GO:0046605	0.00981
GO:0003401	0.00983
GO:0006221	0.00983
GO:0071312	0.00983
GO:0071677	0.00983
GO:0045737	0.00983
GO:0098927	0.00984
GO:0032873	0.00984
GO:0002820	0.00984
GO:0055081	0.00984
GO:0051973	0.00992
GO:0070670	0.00993
GO:1900026	0.00993
GO:0002507	0.00993
GO:1901020	0.00993
GO:0051235	0.00997
GO:0007223	0.00997
GO:0045197	0.00997
GO:0010761	0.00997
GO:0045070	0.00997
GO:0048255	0.00997
GO:0051017	0.01002
GO:0051129	0.01003
GO:0043903	0.01005
GO:0030218	0.01008
GO:0043254	0.01008
GO:0043068	0.0101
GO:0031057	0.01028
GO:0007623	0.01029
GO:0036124	0.01041
GO:0031000	0.01041
GO:0034063	0.01041
GO:0060977	0.01041
GO:2000304	0.01041
GO:0045898	0.01041
GO:0048148	0.01041
GO:0090154	0.01041
GO:0043248	0.01041
GO:0060009	0.01041
GO:0007093	0.01055
GO:0046824	0.01066
GO:0048678	0.01073
GO:0055006	0.01081
GO:0003186	0.0109
GO:0060318	0.0109
GO:0070345	0.0109
GO:0060535	0.0109
GO:0060662	0.0109
GO:0060605	0.0109
GO:1904688	0.0109
GO:0070934	0.0109
GO:0071051	0.0109
GO:0044828	0.0109
GO:0061428	0.0109
GO:0097039	0.0109
GO:0071211	0.0109
GO:0051534	0.0109
GO:0071680	0.0109
GO:0071681	0.0109
GO:1902988	0.0109
GO:0042760	0.0109
GO:0032876	0.0109
GO:0022614	0.0109
GO:2000491	0.0109
[truncated: 1,007 more rows]

## Sheet: REVIGO_Gains
Supplementary Table vIb: Enriched molecular functions for proteins involved in egdetic gains after REVIGO prunning
GO_term_ID	description	log10 p-value	uniqueness	dispensability
GO:0001076	transcription factor activity, RNA polymerase II transcription factor binding	-3.7696	0.964	0
GO:0001077	transcriptional activator activity, RNA polymerase II core promoter proximal region sequence-specific binding	-3.5686	0.964	0
GO:0005041	low-density lipoprotein receptor activity	-1.6929	0.972	0
GO:0005057	signal transducer activity, downstream of receptor	-3.699	0.966	0
GO:0005198	structural molecule activity	-1.3548	0.994	0
GO:0008565	protein transporter activity	-2.4547	0.977	0
GO:0031625	ubiquitin protein ligase binding	-300	0.919	0
GO:0045182	translation regulator activity	-2.1765	0.994	0
GO:0046976	histone methyltransferase activity (H3-K27 specific)	-3.8861	0.915	0
GO:0097027	ubiquitin-protein transferase activator activity	-3.1192	0.961	0
GO:0070990	snRNP binding	-3.7959	0.961	0.005
GO:0042605	peptide antigen binding	-3.585	0.981	0.005
GO:0001046	core promoter sequence-specific DNA binding	-3.7696	0.889	0.006
GO:0005515	protein binding	-300	0.987	0.013
GO:0044877	macromolecular complex binding	-3.1938	0.987	0.019
GO:0046980	tapasin binding	-3.1192	0.976	0.024
GO:1990763	arrestin family protein binding	-1.3503	0.975	0.025
GO:0043532	angiostatin binding	-1.5585	0.974	0.027
GO:0046977	TAP binding	-1.783	0.974	0.027
GO:0048408	epidermal growth factor binding	-1.5585	0.974	0.027
GO:0097371	MDM2/MDM4 family protein binding	-1.3503	0.974	0.027
GO:0019958	C-X-C chemokine binding	-1.3503	0.974	0.028
GO:0043560	insulin receptor substrate binding	-2.4789	0.973	0.029
GO:0045294	alpha-catenin binding	-2.7055	0.973	0.029
GO:0051787	misfolded protein binding	-3.5528	0.973	0.029
GO:0032794	GTPase activating protein binding	-2.3316	0.973	0.03
GO:0005521	lamin binding	-1.4112	0.972	0.03
GO:0097602	cullin family protein binding	-2.1574	0.972	0.03
GO:0032183	SUMO binding	-3.2441	0.972	0.03
GO:0034185	apolipoprotein binding	-1.6035	0.972	0.03
GO:0070064	proline-rich region binding	-3.0915	0.972	0.031
GO:0070412	R-SMAD binding	-3.8239	0.967	0.031
GO:0030332	cyclin binding	-2.8962	0.972	0.031
GO:0046966	thyroid hormone receptor binding	-3.8861	0.88	0.031
GO:0031369	translation initiation factor binding	-2.1891	0.971	0.032
GO:0042169	SH2 domain binding	-3.8861	0.95	0.032
GO:0030544	Hsp70 protein binding	-3.284	0.971	0.032
GO:0048487	beta-tubulin binding	-3.8239	0.935	0.032
GO:0001098	basal transcription machinery binding	-1.9618	0.971	0.032
GO:0045309	protein phosphorylated amino acid binding	-2.7144	0.966	0.033
GO:0035064	methylated histone binding	-3.4685	0.97	0.034
GO:0005070	SH3/SH2 adaptor activity	-3.4949	0.962	0.034
GO:0048306	calcium-dependent protein binding	-1.8921	0.97	0.034
GO:0032947	protein complex scaffold	-3.7959	0.961	0.034
GO:0046332	SMAD binding	-2.1649	0.97	0.035
GO:0051219	phosphoprotein binding	-1.5972	0.97	0.035
GO:0019905	syntaxin binding	-1.504	0.969	0.035
GO:0044325	ion channel binding	-2.8013	0.969	0.036
GO:0000149	SNARE binding	-1.6356	0.969	0.037
GO:0045296	cadherin binding	-300	0.963	0.041
GO:0008092	cytoskeletal protein binding	-2.1612	0.964	0.047
GO:0050839	cell adhesion molecule binding	-1.3437	0.966	0.05
GO:0051380	norepinephrine binding	-1.9481	0.956	0.101
GO:0004386	helicase activity	-3.4685	0.908	0.103
GO:0034648	histone demethylase activity (H3-dimethyl-K4 specific)	-1.5585	0.954	0.106
GO:0047035	testosterone dehydrogenase (NAD+) activity	-3.4089	0.932	0.109
GO:0016886	ligase activity, forming phosphoric ester bonds	-2.3585	0.943	0.113
GO:1901338	catecholamine binding	-2.3316	0.957	0.115
GO:0005528	FK506 binding	-2.3316	0.957	0.116
GO:0003755	peptidyl-prolyl cis-trans isomerase activity	-1.4558	0.947	0.129
GO:0016874	ligase activity	-1.4955	0.942	0.149
GO:0005525	GTP binding	-2.4935	0.929	0.157
GO:0000287	magnesium ion binding	-1.8536	0.982	0.16
GO:0097617	annealing activity	-1.7557	0.941	0.182
GO:0035198	miRNA binding	-3.2518	0.924	0.184
GO:0004683	calmodulin-dependent protein kinase activity	-3.3279	0.905	0.223
GO:0035251	UDP-glucosyltransferase activity	-2.3585	0.93	0.24
GO:0047144	2-acylglycerol-3-phosphate O-acyltransferase activity	-2.1574	0.928	0.24
GO:1904264	ubiquitin protein ligase activity involved in ERAD pathway	-3.0915	0.924	0.247
GO:0019784	NEDD8-specific protease activity	-3.1192	0.923	0.251
GO:0032356	oxidized DNA binding	-2.0164	0.927	0.264
GO:0070883	pre-miRNA binding	-1.9481	0.93	0.28
GO:0034513	box H/ACA snoRNA binding	-2.3382	0.929	0.284
GO:0050543	icosatetraenoic acid binding	-1.3503	0.975	0.288
GO:0008097	5S rRNA binding	-1.4807	0.928	0.29
GO:0097322	7SK snRNA binding	-2.7282	0.928	0.29
GO:0000340	RNA 7-methylguanosine cap binding	-2.0164	0.927	0.293
GO:0035197	siRNA binding	-1.5524	0.927	0.293
GO:0004407	histone deacetylase activity	-3.3372	0.907	0.295
GO:0032041	NAD-dependent histone deacetylase activity (H3-K14 specific)	-1.4807	0.914	0.969
GO:0017136	NAD-dependent histone deacetylase activity	-2.5114	0.912	0.919
GO:0015056	corticotrophin-releasing factor receptor activity	-1.5585	0.967	0.296
GO:0030109	HLA-B specific inhibitory MHC class I receptor activity	-2.7282	0.967	0.296
GO:0070679	inositol 1,4,5 trisphosphate binding	-1.4376	0.976	0.298
GO:0003723	RNA binding	-300	0.912	0.299
GO:0035613	RNA stem-loop binding	-1.4112	0.926	0.3
GO:0008270	zinc ion binding	-3.1367	0.98	0.302
GO:0008143	poly(A) binding	-2.9355	0.92	0.303
GO:0005536	glucose binding	-2.1624	0.978	0.303
GO:0023029	MHC class Ib protein binding	-2.3556	0.926	0.304
GO:0097109	neuroligin family protein binding	-1.9481	0.926	0.304
GO:0004722	protein serine/threonine phosphatase activity	-2.2314	0.904	0.311
GO:0031821	G-protein coupled serotonin receptor binding	-2.7282	0.916	0.311
GO:0005030	neurotrophin receptor activity	-1.5585	0.966	0.312
GO:0002162	dystroglycan binding	-1.5524	0.969	0.313
GO:0003684	damaged DNA binding	-2.1739	0.92	0.313
GO:0042975	peroxisome proliferator activated receptor binding	-1.8533	0.923	0.319
GO:0050786	RAGE receptor binding	-1.4807	0.922	0.321
GO:0005165	neurotrophin receptor binding	-2.4789	0.914	0.323
GO:0003697	single-stranded DNA binding	-2.6615	0.917	0.328
GO:0044388	small protein activating enzyme binding	-1.9481	0.939	0.328
GO:0101005	ubiquitinyl hydrolase activity	-1.8207	0.918	0.33
GO:0005159	insulin-like growth factor receptor binding	-2.3316	0.921	0.33
GO:0050750	low-density lipoprotein particle receptor binding	-2.9706	0.921	0.33
GO:0005072	transforming growth factor beta receptor, cytoplasmic mediator activity	-3.8861	0.966	0.335
GO:0015459	potassium channel regulator activity	-1.9809	0.961	0.335
GO:0004985	opioid receptor activity	-1.3503	0.964	0.338
GO:0016922	ligand-dependent nuclear receptor binding	-2.3556	0.919	0.339
GO:0035255	ionotropic glutamate receptor binding	-3.6021	0.912	0.339
GO:0003725	double-stranded RNA binding	-2.8729	0.916	0.341
GO:0046875	ephrin receptor binding	-3.6021	0.918	0.343
GO:0070034	telomerase RNA binding	-2.3045	0.924	0.344
GO:0030235	nitric-oxide synthase regulator activity	-2.7282	0.965	0.345
GO:0003746	translation elongation factor activity	-2.7471	0.923	0.347
GO:0042287	MHC protein binding	-1.9682	0.916	0.351
GO:0031996	thioesterase binding	-3.0555	0.936	0.354
GO:0005154	epidermal growth factor receptor binding	-1.7731	0.917	0.356
GO:0004861	cyclin-dependent protein serine/threonine kinase inhibitor activity	-2.8013	0.96	0.358
GO:0050998	nitric-oxide synthase binding	-1.6929	0.935	0.359
GO:0036002	pre-mRNA binding	-2.3565	0.921	0.36
GO:0030515	snoRNA binding	-2.0348	0.921	0.361
GO:0043274	phospholipase binding	-1.4112	0.935	0.361
GO:0031490	chromatin DNA binding	-3.301	0.884	0.366
GO:0005092	GDP-dissociation inhibitor activity	-1.6929	0.963	0.372
GO:0000049	tRNA binding	-1.3133	0.923	0.376
GO:0051019	mitogen-activated protein kinase binding	-4	0.928	0.377
GO:0035035	histone acetyltransferase binding	-1.9918	0.933	0.38
GO:0051920	peroxiredoxin activity	-2.0164	0.936	0.381
GO:0001055	RNA polymerase II activity	-1.5524	0.918	0.382
GO:0051287	NAD binding	-1.498	0.943	0.383
GO:0003730	mRNA 3'-UTR binding	-1.9314	0.914	0.383
GO:0019798	procollagen-proline dioxygenase activity	-1.6794	0.936	0.384
GO:0070975	FHA domain binding	-3.1192	0.959	0.394
GO:0044390	ubiquitin-like protein conjugating enzyme binding	-2.3325	0.931	0.395
GO:0061608	nuclear import signal receptor activity	-2.1624	0.98	0.397
GO:0000993	RNA polymerase II core binding	-2.699	0.891	0.4
GO:0001099	basal RNA polymerase II transcription machinery binding	-1.9618	0.96	0.966
GO:0070063	RNA polymerase binding	-1.3924	0.93	0.402
GO:1904288	BAT3 complex binding	-1.5585	0.949	0.403
GO:0038062	protein tyrosine kinase collagen receptor activity	-2.0164	0.9	0.405
GO:0086008	voltage-gated potassium channel activity involved in cardiac muscle cell action potential repolarization	-1.7557	0.974	0.405
GO:1990254	keratin filament binding	-2.3382	0.949	0.409
GO:0010997	anaphase-promoting complex binding	-2.3382	0.948	0.414
GO:0004385	guanylate kinase activity	-2.04	0.915	0.417
GO:0017166	vinculin binding	-1.4807	0.943	0.419
GO:0034452	dynactin binding	-1.4376	0.943	0.419
GO:0097016	L27 domain binding	-1.5585	0.956	0.422
GO:0051117	ATPase binding	-2.9066	0.927	0.423
GO:0098505	G-rich strand telomeric DNA binding	-2.7055	0.92	0.426
GO:0031005	filamin binding	-1.4376	0.942	0.427
GO:0000213	tRNA-intron endonuclease activity	-2.04	0.922	0.428
GO:0048185	activin binding	-2.04	0.946	0.435
GO:0031489	myosin V binding	-1.9	0.939	0.436
GO:0070628	proteasome binding	-2.3556	0.946	0.437
GO:0044323	retinoic acid-responsive element binding	-1.5585	0.923	0.439
GO:0002020	protease binding	-1.6594	0.925	0.441
GO:0050693	LBD domain binding	-1.3503	0.955	0.443
GO:0001156	TFIIIC-class transcription factor binding	-1.5585	0.942	0.447
GO:0031683	G-protein beta/gamma-subunit complex binding	-1.387	0.944	0.451
GO:0030020	extracellular matrix structural constituent conferring tensile strength	-1.8533	0.986	0.452
GO:0017137	Rab GTPase binding	-3.2076	0.917	0.452
GO:0048273	mitogen-activated protein kinase p38 binding	-1.3503	0.935	0.454
GO:0050321	tau-protein kinase activity	-2.8013	0.912	0.457
GO:0070016	armadillo repeat domain binding	-1.8533	0.953	0.459
GO:0004708	MAP kinase kinase activity	-1.4112	0.897	0.46
GO:0008327	methyl-CpG binding	-2.5114	0.905	0.461
GO:0019207	kinase regulator activity	-1.6404	0.957	0.462
GO:0043522	leucine zipper domain binding	-2.04	0.953	0.463
GO:0001025	RNA polymerase III transcription factor binding	-1.5585	0.941	0.463
GO:0043426	MRF binding	-1.9481	0.941	0.463
GO:0008428	ribonuclease inhibitor activity	-1.5585	0.964	0.463
GO:0005158	insulin receptor binding	-1.8292	0.889	0.466
GO:0004711	ribosomal protein S6 kinase activity	-1.5585	0.917	0.47
GO:0042162	telomeric DNA binding	-2.0128	0.912	0.477
GO:0030275	LRR domain binding	-1.3515	0.952	0.478
GO:0017022	myosin binding	-3.2596	0.936	0.48
GO:0019237	centromeric DNA binding	-1.3503	0.917	0.482
GO:0017162	aryl hydrocarbon receptor binding	-2.3585	0.895	0.482
GO:0043422	protein kinase B binding	-1.7557	0.931	0.483
GO:0019894	kinesin binding	-1.6295	0.938	0.483
GO:0042805	actinin binding	-2.1475	0.938	0.485
GO:0004689	phosphorylase kinase activity	-1.9481	0.915	0.487
GO:0003696	satellite DNA binding	-1.6794	0.916	0.487
GO:0034236	protein kinase A catalytic subunit binding	-2.6308	0.926	0.488
GO:0030983	mismatched DNA binding	-3.0915	0.916	0.489
GO:0016247	channel regulator activity	-1.4924	0.961	0.49
GO:0000995	transcription factor activity, core RNA polymerase III binding	-1.3503	0.971	0.493
GO:0003680	AT DNA binding	-2.4789	0.915	0.497
GO:0097718	disordered domain specific binding	-2.7959	0.95	0.498
GO:0035184	histone threonine kinase activity	-1.6794	0.911	0.498
GO:0017056	structural constituent of nuclear pore	-1.388	0.985	0.5
GO:0019789	SUMO transferase activity	-2.1574	0.924	0.502
GO:0030159	receptor signaling complex scaffold activity	-1.388	0.963	0.503
GO:0005219	ryanodine-sensitive calcium-release channel activity	-1.5585	0.948	0.506
GO:0001223	transcription coactivator binding	-2.4225	0.936	0.51
GO:0043028	cysteine-type endopeptidase regulator activity involved in apoptotic process	-1.3469	0.961	0.513
GO:0017025	TBP-class protein binding	-2.5031	0.935	0.517
GO:0031694	alpha-2A adrenergic receptor binding	-1.9481	0.916	0.52
GO:0043425	bHLH transcription factor binding	-3.6021	0.934	0.523
GO:0099609	microtubule lateral binding	-1.5585	0.945	0.524
GO:0000990	transcription factor activity, core RNA polymerase binding	-3.0555	0.97	0.526
GO:0070888	E-box binding	-2.857	0.911	0.527
GO:0010484	H3 histone acetyltransferase activity	-1.5585	0.932	0.532
GO:0043027	cysteine-type endopeptidase inhibitor activity involved in apoptotic process	-1.7828	0.96	0.536
GO:0031748	D1 dopamine receptor binding	-2.3382	0.913	0.54
GO:0019900	kinase binding	-3.6383	0.913	0.542
GO:0005167	neurotrophin TRK receptor binding	-1.6794	0.915	0.544
GO:0005168	neurotrophin TRKA receptor binding	-1.3503	0.915	0.921
GO:1990782	protein tyrosine kinase binding	-1.3373	0.923	0.549
GO:0051020	GTPase binding	-2.7423	0.918	0.551
GO:0034713	type I transforming growth factor beta receptor binding	-1.8533	0.916	0.554
GO:0016435	rRNA (guanine) methyltransferase activity	-2.7282	0.916	0.557
GO:0017124	SH3 domain binding	-3.7212	0.945	0.561
GO:0033613	activating transcription factor binding	-2.7122	0.93	0.562
GO:0001103	RNA polymerase II repressing transcription factor binding	-2.2083	0.933	0.564
GO:0051059	NF-kappaB binding	-1.9918	0.934	0.566
GO:0004004	ATP-dependent RNA helicase activity	-3.0706	0.907	0.566
GO:0000983	transcription factor activity, RNA polymerase II core promoter sequence-specific	-1.5844	0.971	0.568
GO:0004713	protein tyrosine kinase activity	-2.8239	0.895	0.571
GO:0015440	peptide-transporting ATPase activity	-2.6144	0.912	0.573
GO:0008574	ATP-dependent microtubule motor activity, plus-end-directed	-1.3937	0.919	0.574
GO:0000268	peroxisome targeting sequence binding	-1.9481	0.982	0.58
GO:0070139	SUMO-specific endopeptidase activity	-1.5585	0.925	0.582
GO:0047025	3-oxoacyl-[acyl-carrier-protein] reductase (NADH) activity	-2.7282	0.937	0.583
GO:0003909	DNA ligase activity	-1.6794	0.941	0.586
GO:0003910	DNA ligase (ATP) activity	-1.3503	0.942	0.958
GO:0034485	phosphatidylinositol-3,4,5-trisphosphate 5-phosphatase activity	-1.9481	0.918	0.587
GO:0001882	nucleoside binding	-2.2464	0.922	0.589
GO:0051010	microtubule plus-end binding	-1.4376	0.94	0.59
GO:0003779	actin binding	-1.3872	0.927	0.605
GO:0001047	core promoter binding	-3.1367	0.9	0.607
GO:0030618	transforming growth factor beta receptor, pathway-specific cytoplasmic mediator activity	-1.9481	0.967	0.61
GO:0070137	ubiquitin-like protein-specific endopeptidase activity	-1.5585	0.925	0.611
GO:0034450	ubiquitin-ubiquitin ligase activity	-2.8013	0.924	0.611
GO:0001158	enhancer sequence-specific DNA binding	-3.3565	0.894	0.615
GO:0031491	nucleosome binding	-2.3655	0.96	0.622
GO:0032813	tumor necrosis factor receptor superfamily binding	-1.5322	0.906	0.622
GO:0035242	protein-arginine omega-N asymmetric methyltransferase activity	-1.6794	0.915	0.623
GO:0030234	enzyme regulator activity	-1.9241	0.955	0.626
GO:0043015	gamma-tubulin binding	-2.699	0.937	0.628
GO:0016403	dimethylargininase activity	-3.1192	0.925	0.629
GO:0052743	inositol tetrakisphosphate phosphatase activity	-2.04	0.911	0.633
GO:0052659	inositol-1,3,4,5-tetrakisphosphate 5-phosphatase activity	-1.4807	0.912	0.912
GO:0019199	transmembrane receptor protein kinase activity	-2.3179	0.879	0.633
GO:0052650	NADP-retinol dehydrogenase activity	-2.5114	0.932	0.639
GO:0001191	transcriptional repressor activity, RNA polymerase II transcription factor binding	-1.6404	0.96	0.651
GO:0017018	myosin phosphatase activity	-1.5585	0.92	0.651
GO:0098641	cadherin binding involved in cell-cell adhesion	-1.6223	0.968	0.652
GO:0004707	MAP kinase activity	-1.4112	0.891	0.653
GO:0003857	3-hydroxyacyl-CoA dehydrogenase activity	-1.6929	0.932	0.656
GO:0000981	RNA polymerase II transcription factor activity, sequence-specific DNA binding	-2.5317	0.968	0.661
GO:0016538	cyclin-dependent protein serine/threonine kinase regulator activity	-1.9031	0.96	0.662
GO:0046933	proton-transporting ATP synthase activity, rotational mechanism	-2.2306	0.901	0.664
GO:0004675	transmembrane receptor protein serine/threonine kinase activity	-1.9	0.885	0.666
GO:0004812	aminoacyl-tRNA ligase activity	-2.1765	0.937	0.667
GO:0086089	voltage-gated potassium channel activity involved in atrial cardiac muscle cell action potential repolarization	-1.5585	0.975	0.669
GO:0005164	tumor necrosis factor receptor binding	-1.4131	0.909	0.67
GO:1990825	sequence-specific mRNA binding	-1.5524	0.925	0.673
GO:0017160	Ral GTPase binding	-1.8292	0.93	0.674
GO:0016812	hydrolase activity, acting on carbon-nitrogen (but not peptide) bonds, in cyclic amides	-1.3503	0.921	0.679
GO:0004532	exoribonuclease activity	-1.7749	0.91	0.685
GO:0005048	signal sequence binding	-1.389	0.98	0.686
GO:0001083	transcription factor activity, RNA polymerase II basal transcription factor binding	-1.3503	0.967	0.702
GO:0033592	RNA strand annealing activity	-1.9481	0.924	0.703
GO:0035615	clathrin adaptor activity	-2.04	0.965	0.705
GO:0001227	transcriptional repressor activity, RNA polymerase II transcription regulatory region sequence-specific binding	-1.7089	0.966	0.705
GO:0008093	cytoskeletal adaptor activity	-2.4789	0.935	0.71
GO:0042809	vitamin D receptor binding	-3.4559	0.884	0.712
GO:0046965	retinoid X receptor binding	-2.2306	0.884	0.712
GO:0001205	transcriptional activator activity, RNA polymerase II distal enhancer sequence-specific binding	-2.1891	0.97	0.713
GO:1990837	sequence-specific double-stranded DNA binding	-2.209	0.881	0.724
GO:0001164	RNA polymerase I CORE element sequence-specific DNA binding	-2.7055	0.907	0.725
GO:0001012	RNA polymerase II regulatory region DNA binding	-1.4307	0.889	0.727
GO:0097100	supercoiled DNA binding	-1.9481	0.927	0.732
GO:0032357	oxidized purine DNA binding	-1.6794	0.927	0.734
GO:0008379	thioredoxin peroxidase activity	-1.9481	0.938	0.747
GO:0043022	ribosome binding	-3.2518	0.957	0.748
GO:0036459	thiol-dependent ubiquitinyl hydrolase activity	-1.8413	0.906	0.748
GO:0048365	Rac GTPase binding	-1.9048	0.924	0.75
GO:0045159	myosin II binding	-1.3503	0.943	0.756
GO:0000982	transcription factor activity, RNA polymerase II core promoter proximal region sequence-specific binding	-1.9801	0.964	0.767
GO:0030331	estrogen receptor binding	-2.7721	0.906	0.769
GO:0050815	phosphoserine binding	-1.6794	0.955	0.771
GO:0008187	poly-pyrimidine tract binding	-2.0325	0.917	0.775
GO:0043024	ribosomal small subunit binding	-1.4112	0.96	0.776
GO:0070410	co-SMAD binding	-2.4789	0.968	0.777
GO:0018024	histone-lysine N-methyltransferase activity	-2.5686	0.9	0.78
GO:0042054	histone methyltransferase activity	-1.4869	0.9	0.91
GO:0034594	phosphatidylinositol trisphosphate phosphatase activity	-1.6794	0.916	0.781
GO:0030228	lipoprotein particle receptor activity	-1.3954	0.971	0.782
GO:0035259	glucocorticoid receptor binding	-2.6308	0.912	0.796
GO:0000989	transcription factor activity, transcription factor binding	-3.0458	0.96	0.798
GO:0003712	transcription cofactor activity	-1.6763	0.96	0.945
GO:0001228	transcriptional activator activity, RNA polymerase II transcription regulatory region sequence-specific binding	-1.8582	0.964	0.799
GO:0031802	type 5 metabotropic glutamate receptor binding	-1.9481	0.917	0.801
GO:0000400	four-way junction DNA binding	-1.6507	0.922	0.801
GO:0070039	rRNA (guanosine-2'-O-)-methyltransferase activity	-1.5585	0.917	0.806
GO:0001106	RNA polymerase II transcription corepressor activity	-1.4102	0.963	0.806
GO:0046974	histone methyltransferase activity (H3-K9 specific)	-2.7055	0.912	0.808
GO:0031697	beta-1 adrenergic receptor binding	-1.5585	0.918	0.816
GO:0048763	calcium-induced calcium release activity	-1.5585	0.948	0.82
GO:0001078	transcriptional repressor activity, RNA polymerase II core promoter proximal region sequence-specific binding	-1.6077	0.966	0.82
GO:0003678	DNA helicase activity	-2.1637	0.911	0.827
GO:0035256	G-protein coupled glutamate receptor binding	-2.0164	0.914	0.838
GO:0004303	estradiol 17-beta-dehydrogenase activity	-1.3954	0.93	0.842
GO:0016896	exoribonuclease activity, producing 5'-phosphomonoesters	-1.4203	0.911	0.85
GO:0004714	transmembrane receptor protein tyrosine kinase activity	-1.3029	0.877	0.852
GO:0034237	protein kinase A regulatory subunit binding	-1.8589	0.967	0.852
GO:0000979	RNA polymerase II core promoter sequence-specific DNA binding	-3.7696	0.893	0.858
GO:0001190	transcriptional activator activity, RNA polymerase II transcription factor binding	-1.658	0.961	0.858
GO:0031749	D2 dopamine receptor binding	-1.5585	0.918	0.861
GO:0001042	RNA polymerase I core binding	-1.3503	0.935	0.864
GO:0099106	ion channel regulator activity	-1.5588	0.96	0.865
GO:1990948	ubiquitin ligase inhibitor activity	-2.3382	0.96	0.87
GO:0004003	ATP-dependent DNA helicase activity	-1.6098	0.911	0.871
GO:0035240	dopamine binding	-1.6794	0.949	0.875
GO:0035174	histone serine kinase activity	-1.3503	0.912	0.877
GO:0001091	RNA polymerase II basal transcription factor binding	-1.9574	0.926	0.884
GO:0042800	histone methyltransferase activity (H3-K4 specific)	-1.3954	0.906	0.885
GO:0052658	inositol-1,4,5-trisphosphate 5-phosphatase activity	-1.3503	0.914	0.888
GO:0004656	procollagen-proline 4-dioxygenase activity	-1.5585	0.938	0.888
GO:0017016	Ras GTPase binding	-2.6596	0.912	0.889
GO:0000977	RNA polymerase II regulatory region sequence-specific DNA binding	-1.3513	0.875	0.897
GO:0000976	transcription regulatory region sequence-specific DNA binding	-1.3775	0.874	0.926
GO:0031078	histone deacetylase activity (H3-K14 specific)	-1.4807	0.915	0.898
GO:0019783	ubiquitin-like protein-specific protease activity	-2.0079	0.907	0.898
Biological Processes
GO_term_ID	description	log10 p-value	uniqueness	dispensability
GO:0007041	lysosomal transport	-2.6478	0.961	0
GO:0016032	viral process	-300	0.981	0
GO:0034975	protein folding in endoplasmic reticulum	-3.4949	0.992	0.002
GO:0030307	positive regulation of cell growth	-4	0.835	0.002
GO:0030324	lung development	-3.9586	0.911	0.012
GO:0032091	negative regulation of protein binding	-3.8539	0.929	0.026
GO:0009786	regulation of asymmetric cell division	-3.9208	0.955	0.03
GO:0051403	stress-activated MAPK cascade	-3.9208	0.789	0.045
GO:1990416	cellular response to brain-derived neurotrophic factor stimulus	-3.9208	0.898	0.09
GO:0000463	maturation of LSU-rRNA from tricistronic rRNA transcript (SSU-rRNA, 5.8S rRNA, LSU-rRNA)	-3.9208	0.879	0.104
GO:0072553	terminal button organization	-2.7471	0.937	0.105
GO:1904999	positive regulation of leukocyte adhesion to arterial endothelial cell	-2.7471	0.944	0.112
GO:0097527	necroptotic signaling pathway	-3.4437	0.91	0.119
GO:0030866	cortical actin cytoskeleton organization	-3.9586	0.892	0.119
GO:0042789	mRNA transcription from RNA polymerase II promoter	-3.4685	0.943	0.133
GO:0008361	regulation of cell size	-3.1427	0.889	0.141
GO:0035019	somatic stem cell population maintenance	-3.8861	0.938	0.144
GO:0007569	cell aging	-3.8539	0.924	0.148
GO:0071695	anatomical structure maturation	-2.9872	0.944	0.152
GO:0032481	positive regulation of type I interferon production	-2.7696	0.88	0.159
GO:0006260	DNA replication	-3.3665	0.908	0.16
GO:0007498	mesoderm development	-2.9469	0.94	0.166
GO:0007568	aging	-3.1871	0.939	0.167
GO:0036353	histone H2A-K119 monoubiquitination	-3.5376	0.873	0.173
GO:0007584	response to nutrient	-3.4815	0.913	0.175
GO:0030111	regulation of Wnt signaling pathway	-3.4089	0.86	0.176
GO:0032786	positive regulation of DNA-templated transcription, elongation	-3.1612	0.876	0.177
GO:1990000	amyloid fibril formation	-3.6021	0.886	0.178
GO:0071816	tail-anchored membrane protein insertion into ER membrane	-3.9208	0.865	0.179
GO:0006996	organelle organization	-3.8861	0.912	0.209
GO:0001570	vasculogenesis	-3.6778	0.894	0.21
GO:0043312	neutrophil degranulation	-3.7447	0.842	0.214
GO:0030335	positive regulation of cell migration	-3.7447	0.859	0.219
GO:0006417	regulation of translation	-3.9208	0.838	0.221
GO:0032508	DNA duplex unwinding	-3.8539	0.896	0.223
GO:0035902	response to immobilization stress	-3.8861	0.942	0.225
GO:0072203	cell proliferation involved in metanephros development	-2.7305	0.923	0.226
GO:0002931	response to ischemia	-3.3372	0.94	0.232
GO:0035690	cellular response to drug	-3.8861	0.906	0.233
GO:0031648	protein destabilization	-2.7905	0.954	0.235
GO:0001649	osteoblast differentiation	-2.7375	0.911	0.237
GO:0070262	peptidyl-serine dephosphorylation	-3.284	0.932	0.243
GO:0006968	cellular defense response	-2.8447	0.935	0.246
GO:0043687	post-translational protein modification	-2.8508	0.931	0.246
GO:0071236	cellular response to antibiotic	-2.9666	0.916	0.247
GO:0031503	protein complex localization	-3.7212	0.947	0.249
GO:2000334	positive regulation of blood microparticle formation	-3.1427	0.843	0.254
GO:0019216	regulation of lipid metabolic process	-2.6655	0.909	0.256
GO:0032781	positive regulation of ATPase activity	-3.1805	0.942	0.256
GO:0097284	hepatocyte apoptotic process	-3.4437	0.955	0.257
GO:0044089	positive regulation of cellular component biogenesis	-3.5528	0.843	0.262
GO:0019885	antigen processing and presentation of endogenous peptide antigen via MHC class I	-3.301	0.96	0.268
GO:0046949	fatty-acyl-CoA biosynthetic process	-3.0177	0.948	0.268
GO:0042593	glucose homeostasis	-2.6778	0.942	0.28
GO:0001678	cellular glucose homeostasis	-2.6696	0.93	0.933
GO:0021987	cerebral cortex development	-3.8539	0.901	0.281
GO:0050999	regulation of nitric-oxide synthase activity	-2.983	0.92	0.283
GO:0034097	response to cytokine	-2.9393	0.895	0.283
GO:0001702	gastrulation with mouth forming second	-3.3768	0.924	0.286
GO:0001889	liver development	-3.2366	0.912	0.287
GO:0002320	lymphoid progenitor cell differentiation	-3.4318	0.888	0.29
GO:0001890	placenta development	-3.8861	0.903	0.29
GO:0043276	anoikis	-2.6635	0.952	0.301
GO:0010661	positive regulation of muscle cell apoptotic process	-2.6498	0.908	0.305
GO:0010888	negative regulation of lipid storage	-2.9172	0.891	0.31
GO:0050680	negative regulation of epithelial cell proliferation	-2.6615	0.915	0.31
GO:0061024	membrane organization	-3.6383	0.921	0.311
GO:0060561	apoptotic process involved in morphogenesis	-2.5884	0.907	0.315
GO:0043124	negative regulation of I-kappaB kinase/NF-kappaB signaling	-2.752	0.855	0.324
GO:0007010	cytoskeleton organization	-2.8729	0.895	0.326
GO:1903140	regulation of establishment of endothelial barrier	-2.8327	0.884	0.326
GO:1903146	regulation of mitophagy	-3.9208	0.855	0.329
GO:2000008	regulation of protein localization to cell surface	-3.301	0.905	0.33
GO:0042921	glucocorticoid receptor signaling pathway	-3.8239	0.85	0.33
GO:2000370	positive regulation of clathrin-dependent endocytosis	-3.5376	0.841	0.334
GO:0010628	positive regulation of gene expression	-4	0.852	0.335
GO:1990668	vesicle fusion with endoplasmic reticulum-Golgi intermediate compartment (ERGIC) membrane	-2.9172	0.879	0.338
GO:1904294	positive regulation of ERAD pathway	-3.9208	0.75	0.356
GO:0043491	protein kinase B signaling	-2.7282	0.896	0.358
GO:0071732	cellular response to nitric oxide	-3.8239	0.86	0.36
GO:0034329	cell junction assembly	-3.0655	0.883	0.361
GO:0006978	DNA damage response, signal transduction by p53 class mediator resulting in transcription of p21 class mediator	-3.9208	0.872	0.364
GO:0035666	TRIF-dependent toll-like receptor signaling pathway	-3.5686	0.833	0.376
GO:0070198	protein localization to chromosome, telomeric region	-2.8356	0.936	0.376
GO:0051402	neuron apoptotic process	-2.644	0.945	0.379
GO:0007249	I-kappaB kinase/NF-kappaB signaling	-3.2676	0.891	0.382
GO:0033209	tumor necrosis factor-mediated signaling pathway	-3.0809	0.849	0.391
GO:0070445	regulation of oligodendrocyte progenitor proliferation	-2.7305	0.88	0.391
GO:0000381	regulation of alternative mRNA splicing, via spliceosome	-3.0177	0.897	0.407
GO:0045653	negative regulation of megakaryocyte differentiation	-3.1612	0.84	0.409
GO:0009612	response to mechanical stimulus	-3.1938	0.937	0.412
GO:0005980	glycogen catabolic process	-3.1938	0.911	0.413
GO:0097306	cellular response to alcohol	-3.3279	0.891	0.416
GO:0043278	response to morphine	-3.2366	0.895	0.417
GO:1990830	cellular response to leukemia inhibitory factor	-2.7282	0.92	0.423
GO:0048812	neuron projection morphogenesis	-3.2007	0.813	0.424
GO:0071539	protein localization to centrosome	-2.7878	0.937	0.426
GO:1903320	regulation of protein modification by small protein conjugation or removal	-3.7959	0.857	0.428
GO:1903423	positive regulation of synaptic vesicle recycling	-3.1427	0.88	0.431
GO:1902042	negative regulation of extrinsic apoptotic signaling pathway via death domain receptors	-2.6459	0.838	0.432
GO:0006890	retrograde vesicle-mediated transport, Golgi to ER	-3.0132	0.953	0.432
GO:0042776	mitochondrial ATP synthesis coupled proton transport	-3.9208	0.851	0.432
GO:0007052	mitotic spindle organization	-3.9586	0.846	0.433
GO:0042147	retrograde transport, endosome to Golgi	-3.6576	0.93	0.434
GO:0044087	regulation of cellular component biogenesis	-2.5513	0.876	0.44
GO:0035067	negative regulation of histone acetylation	-3.284	0.777	0.448
GO:1903936	cellular response to sodium arsenite	-3.5376	0.917	0.452
GO:0001824	blastocyst development	-2.8125	0.932	0.454
GO:1902914	regulation of protein polyubiquitination	-3.284	0.884	0.461
GO:0010971	positive regulation of G2/M transition of mitotic cell cycle	-2.9172	0.885	0.468
GO:1904871	positive regulation of protein localization to Cajal body	-3.1427	0.885	0.471
GO:0032410	negative regulation of transporter activity	-2.6326	0.865	0.471
GO:1901655	cellular response to ketone	-2.7645	0.887	0.476
GO:0042407	cristae formation	-2.9872	0.903	0.481
GO:0031126	snoRNA 3'-end processing	-3.1427	0.936	0.486
GO:0006605	protein targeting	-3.5528	0.91	0.486
GO:0055010	ventricular cardiac muscle tissue morphogenesis	-3.1938	0.889	0.486
GO:0034502	protein localization to chromosome	-2.7721	0.931	0.487
GO:0071108	protein K48-linked deubiquitination	-2.9872	0.921	0.488
GO:0046627	negative regulation of insulin receptor signaling pathway	-3.5686	0.8	0.489
GO:0000185	activation of MAPKKK activity	-3.8861	0.788	0.49
GO:0000281	mitotic cytokinesis	-3.6021	0.93	0.493
GO:0038128	ERBB2 signaling pathway	-2.8239	0.898	0.497
GO:0050690	regulation of defense response to virus by virus	-3.5686	0.864	0.498
GO:0035722	interleukin-12-mediated signaling pathway	-2.983	0.888	0.498
GO:0048167	regulation of synaptic plasticity	-2.7471	0.894	0.498
GO:0030049	muscle filament sliding	-3.0706	0.928	0.499
GO:0043433	negative regulation of sequence-specific DNA binding transcription factor activity	-3.5528	0.854	0.503
GO:0006970	response to osmotic stress	-2.9586	0.926	0.507
GO:0000077	DNA damage checkpoint	-3.7447	0.806	0.508
GO:0045579	positive regulation of B cell differentiation	-2.8297	0.826	0.512
GO:0042276	error-prone translesion synthesis	-2.7282	0.855	0.513
GO:0060370	susceptibility to T cell mediated cytotoxicity	-2.7305	0.883	0.514
GO:0007179	transforming growth factor beta receptor signaling pathway	-3.7959	0.831	0.515
GO:0030705	cytoskeleton-dependent intracellular transport	-3.5086	0.935	0.517
GO:0006297	nucleotide-excision repair, DNA gap filling	-3.585	0.86	0.521
GO:0051865	protein autoubiquitination	-2.7545	0.922	0.522
GO:0010039	response to iron ion	-3.4949	0.925	0.522
GO:0043279	response to alkaloid	-2.7423	0.888	0.524
GO:0071398	cellular response to fatty acid	-2.9547	0.879	0.526
GO:0071803	positive regulation of podosome assembly	-3.8239	0.826	0.528
GO:0050994	regulation of lipid catabolic process	-2.752	0.894	0.529
GO:0006607	NLS-bearing protein import into nucleus	-3.585	0.911	0.53
GO:0080135	regulation of cellular response to stress	-3.5686	0.847	0.534
GO:2000027	regulation of organ morphogenesis	-2.556	0.857	0.534
GO:0031098	stress-activated protein kinase signaling cascade	-2.8327	0.858	0.535
GO:1902905	positive regulation of supramolecular fiber organization	-3.5229	0.824	0.539
GO:0007565	female pregnancy	-2.6271	0.945	0.539
GO:0035509	negative regulation of myosin-light-chain-phosphatase activity	-3.0862	0.853	0.541
GO:0006409	tRNA export from nucleus	-2.9393	0.915	0.543
GO:0071870	cellular response to catecholamine stimulus	-3.3768	0.873	0.544
GO:0043154	negative regulation of cysteine-type endopeptidase activity involved in apoptotic process	-3.0269	0.803	0.545
GO:0016572	histone phosphorylation	-3.1135	0.848	0.545
GO:0003181	atrioventricular valve morphogenesis	-3.0088	0.908	0.545
GO:0065003	macromolecular complex assembly	-2.752	0.87	0.547
GO:0030101	natural killer cell activation	-3.3098	0.935	0.548
GO:0010212	response to ionizing radiation	-2.7747	0.945	0.548
GO:0051987	positive regulation of attachment of spindle microtubules to kinetochore	-2.7471	0.897	0.549
GO:0070932	histone H3 deacetylation	-3.0088	0.864	0.554
GO:1905050	positive regulation of metallopeptidase activity	-2.7471	0.86	0.559
GO:0031532	actin cytoskeleton reorganization	-3.5086	0.883	0.56
GO:1902275	regulation of chromatin organization	-2.5867	0.845	0.561
GO:0016233	telomere capping	-3.8539	0.822	0.561
GO:0050796	regulation of insulin secretion	-3.5376	0.822	0.562
GO:0021762	substantia nigra development	-2.5784	0.909	0.563
GO:0036294	cellular response to decreased oxygen levels	-2.7696	0.885	0.564
GO:0050853	B cell receptor signaling pathway	-2.7696	0.827	0.565
GO:0071901	negative regulation of protein serine/threonine kinase activity	-3.2676	0.812	0.567
GO:0030099	myeloid cell differentiation	-3.2218	0.859	0.567
GO:0071320	cellular response to cAMP	-2.9547	0.869	0.568
GO:0007077	mitotic nuclear envelope disassembly	-3.4949	0.869	0.569
GO:0060216	definitive hemopoiesis	-2.7282	0.9	0.57
GO:0006897	endocytosis	-2.9666	0.943	0.571
GO:0031623	receptor internalization	-3.3468	0.885	0.577
GO:0031663	lipopolysaccharide-mediated signaling pathway	-2.7773	0.841	0.58
GO:0048568	embryonic organ development	-2.6737	0.902	0.584
GO:2001252	positive regulation of chromosome organization	-2.8539	0.818	0.585
GO:0002740	negative regulation of cytokine secretion involved in immune response	-2.8297	0.788	0.586
GO:0042981	regulation of apoptotic process	-3.7447	0.91	0.586
GO:0006282	regulation of DNA repair	-3.4202	0.799	0.587
GO:0002183	cytoplasmic translational initiation	-2.8327	0.912	0.587
GO:0007096	regulation of exit from mitosis	-2.9666	0.839	0.591
GO:0022618	ribonucleoprotein complex assembly	-3.8239	0.871	0.591
GO:0035635	entry of bacterium into host cell	-3.9208	0.986	0.594
GO:0045903	positive regulation of translational fidelity	-3.0862	0.85	0.594
GO:0006298	mismatch repair	-3.3372	0.855	0.595
GO:0010288	response to lead ion	-2.5884	0.928	0.597
GO:1904385	cellular response to angiotensin	-3.0088	0.878	0.602
GO:0021549	cerebellum development	-2.7399	0.903	0.605
GO:0042129	regulation of T cell proliferation	-2.6271	0.894	0.608
GO:0042994	cytoplasmic sequestering of transcription factor	-3.3768	0.836	0.615
GO:2000104	negative regulation of DNA-dependent DNA replication	-2.7282	0.859	0.616
GO:0048844	artery morphogenesis	-2.5784	0.911	0.617
GO:0051258	protein polymerization	-3.5376	0.876	0.618
GO:0046968	peptide antigen transport	-2.7305	0.931	0.619
GO:0045132	meiotic chromosome segregation	-3.1427	0.858	0.62
GO:0065004	protein-DNA complex assembly	-3.1871	0.872	0.622
GO:0010970	transport along microtubule	-2.5884	0.88	0.622
GO:0001188	RNA polymerase I transcriptional preinitiation complex assembly	-2.7305	0.872	0.627
GO:0000466	maturation of 5.8S rRNA from tricistronic rRNA transcript (SSU-rRNA, 5.8S rRNA, LSU-rRNA)	-2.7282	0.874	0.627
GO:0033044	regulation of chromosome organization	-2.8928	0.842	0.628
GO:0048709	oligodendrocyte differentiation	-2.6799	0.891	0.632
GO:0061048	negative regulation of branching involved in lung morphogenesis	-2.7471	0.876	0.632
GO:0032927	positive regulation of activin receptor signaling pathway	-3.1612	0.867	0.638
GO:0031122	cytoplasmic microtubule organization	-2.6289	0.876	0.639
GO:0045646	regulation of erythrocyte differentiation	-2.9626	0.822	0.64
GO:0042771	intrinsic apoptotic signaling pathway in response to DNA damage by p53 class mediator	-3.6021	0.841	0.642
GO:0071280	cellular response to copper ion	-3.284	0.908	0.643
GO:1901798	positive regulation of signal transduction by p53 class mediator	-3.4318	0.86	0.647
GO:1903347	negative regulation of bicellular tight junction assembly	-2.7305	0.85	0.648
GO:2000601	positive regulation of Arp2/3 complex-mediated actin nucleation	-2.7471	0.793	0.648
GO:0006418	tRNA aminoacylation for protein translation	-2.9355	0.873	0.651
GO:0007190	activation of adenylate cyclase activity	-2.8447	0.828	0.651
GO:0010165	response to X-ray	-2.9031	0.95	0.654
GO:0051298	centrosome duplication	-3.3979	0.856	0.655
GO:0072594	establishment of protein localization to organelle	-2.8041	0.913	0.655
GO:1904886	beta-catenin destruction complex disassembly	-2.6498	0.834	0.656
GO:0006310	DNA recombination	-2.7282	0.912	0.659
GO:1904378	maintenance of unfolded protein involved in ERAD pathway	-3.5376	0.813	0.66
GO:0008543	fibroblast growth factor receptor signaling pathway	-2.9393	0.838	0.661
GO:0097484	dendrite extension	-3.2366	0.847	0.664
GO:0002076	osteoblast development	-2.8327	0.917	0.665
GO:2000134	negative regulation of G1/S transition of mitotic cell cycle	-2.8996	0.874	0.666
GO:0031115	negative regulation of microtubule polymerization	-3.4437	0.795	0.667
GO:0032200	telomere organization	-2.8356	0.892	0.668
GO:0007183	SMAD protein complex assembly	-3.1612	0.824	0.669
GO:0072425	signal transduction involved in G2 DNA damage checkpoint	-3.7959	0.838	0.669
GO:0042692	muscle cell differentiation	-3.1487	0.903	0.671
GO:0051170	nuclear import	-2.644	0.924	0.68
GO:0050869	negative regulation of B cell activation	-2.7033	0.886	0.68
GO:0031670	cellular response to nutrient	-2.6091	0.897	0.682
GO:0030968	endoplasmic reticulum unfolded protein response	-3.3372	0.819	0.683
GO:0036498	IRE1-mediated unfolded protein response	-2.9547	0.829	0.923
GO:0034620	cellular response to unfolded protein	-3.1024	0.854	0.964
GO:0051571	positive regulation of histone H3-K4 methylation	-3.284	0.782	0.686
GO:0008608	attachment of spindle microtubules to kinetochore	-2.5467	0.935	0.69
GO:0001541	ovarian follicle development	-3.6021	0.91	0.69
GO:0033145	positive regulation of intracellular steroid hormone receptor signaling pathway	-3.6021	0.808	0.694
GO:0060008	Sertoli cell differentiation	-2.7282	0.898	0.695
GO:0019886	antigen processing and presentation of exogenous peptide antigen via MHC class II	-2.7773	0.956	0.696
GO:0090068	positive regulation of cell cycle process	-2.7932	0.864	0.697
GO:0045786	negative regulation of cell cycle	-2.7144	0.865	0.702
GO:0097296	activation of cysteine-type endopeptidase activity involved in apoptotic signaling pathway	-2.8297	0.787	0.704
GO:0045860	positive regulation of protein kinase activity	-2.8356	0.794	0.705
GO:0006886	intracellular protein transport	-3.9208	0.909	0.706
GO:0018027	peptidyl-lysine dimethylation	-2.6498	0.929	0.707
GO:1903364	positive regulation of cellular protein catabolic process	-3.3098	0.818	0.709
GO:0002576	platelet degranulation	-3.0044	0.92	0.71
GO:0030953	astral microtubule organization	-2.7471	0.872	0.71
GO:0051044	positive regulation of membrane protein ectodomain proteolysis	-3.2924	0.847	0.713
GO:0006281	DNA repair	-2.9872	0.821	0.715
GO:0016567	protein ubiquitination	-3.699	0.902	0.719
GO:0043536	positive regulation of blood vessel endothelial cell migration	-3.3872	0.848	0.719
GO:0033129	positive regulation of histone phosphorylation	-3.1427	0.788	0.72
GO:0072075	metanephric mesenchyme development	-2.6596	0.921	0.724
GO:0006363	termination of RNA polymerase I transcription	-2.5784	0.938	0.729
GO:1904667	negative regulation of ubiquitin protein ligase activity	-2.762	0.818	0.73
GO:0033182	regulation of histone ubiquitination	-3.5376	0.807	0.732
GO:0019079	viral genome replication	-3.3279	0.982	0.734
GO:0048814	regulation of dendrite morphogenesis	-2.8013	0.79	0.735
GO:0009895	negative regulation of catabolic process	-2.9101	0.87	0.736
GO:0035196	production of miRNAs involved in gene silencing by miRNA	-3.5686	0.728	0.737
GO:0007420	brain development	-3.2924	0.884	0.737
GO:0043518	negative regulation of DNA damage response, signal transduction by p53 class mediator	-2.6596	0.829	0.737
GO:0006270	DNA replication initiation	-2.585	0.921	0.738
GO:0051052	regulation of DNA metabolic process	-2.6799	0.868	0.739
GO:0006110	regulation of glycolytic process	-3.1192	0.846	0.741
GO:0060045	positive regulation of cardiac muscle cell proliferation	-2.9172	0.828	0.741
GO:0021761	limbic system development	-2.5918	0.902	0.742
GO:0009411	response to UV	-2.6055	0.945	0.745
GO:0003151	outflow tract morphogenesis	-2.6108	0.895	0.745
GO:0002753	cytoplasmic pattern recognition receptor signaling pathway	-2.762	0.804	0.747
GO:0048588	developmental cell growth	-3.0862	0.896	0.749
GO:0071375	cellular response to peptide hormone stimulus	-3.041	0.848	0.75
GO:0015031	protein transport	-2.9957	0.922	0.752
GO:0046826	negative regulation of protein export from nucleus	-2.7471	0.876	0.753
GO:0070507	regulation of microtubule cytoskeleton organization	-2.9281	0.83	0.755
GO:0030520	intracellular estrogen receptor signaling pathway	-2.5482	0.836	0.759
GO:0060413	atrial septum morphogenesis	-2.9666	0.904	0.767
GO:0042326	negative regulation of phosphorylation	-2.757	0.855	0.77
GO:0097150	neuronal stem cell population maintenance	-3.8861	0.943	0.771
GO:0000028	ribosomal small subunit assembly	-3.6021	0.881	0.772
GO:0055013	cardiac muscle cell development	-2.5784	0.876	0.773
GO:0031047	gene silencing by RNA	-2.6778	0.864	0.774
GO:0038180	nerve growth factor signaling pathway	-3.1427	0.866	0.775
GO:0070059	intrinsic apoptotic signaling pathway in response to endoplasmic reticulum stress	-2.6038	0.841	0.776
GO:0051099	positive regulation of binding	-3.5229	0.93	0.777
GO:0032688	negative regulation of interferon-beta production	-2.6596	0.894	0.777
GO:0032467	positive regulation of cytokinesis	-2.7399	0.878	0.778
GO:0071549	cellular response to dexamethasone stimulus	-2.9872	0.868	0.78
GO:2000767	positive regulation of cytoplasmic translation	-2.7471	0.854	0.782
GO:0032801	receptor catabolic process	-2.6716	0.939	0.782
GO:0072386	plus-end-directed organelle transport along microtubule	-2.7305	0.901	0.783
GO:0010803	regulation of tumor necrosis factor-mediated signaling pathway	-3.301	0.85	0.785
GO:0051568	histone H3-K4 methylation	-2.6536	0.85	0.787
GO:0043409	negative regulation of MAPK cascade	-2.8729	0.752	0.787
GO:0006511	ubiquitin-dependent protein catabolic process	-2.9957	0.893	0.787
GO:0007084	mitotic nuclear envelope reassembly	-2.7305	0.886	0.788
GO:0000470	maturation of LSU-rRNA	-2.6635	0.871	0.791
GO:0032727	positive regulation of interferon-alpha production	-2.9172	0.892	0.799
GO:0051123	RNA polymerase II transcriptional preinitiation complex assembly	-2.6716	0.85	0.799
GO:0051492	regulation of stress fiber assembly	-2.8097	0.818	0.799
GO:0016573	histone acetylation	-2.5735	0.838	0.799
GO:0033119	negative regulation of RNA splicing	-2.8477	0.869	0.799
GO:0051101	regulation of DNA binding	-2.8477	0.936	0.801
GO:0070830	bicellular tight junction assembly	-2.9508	0.893	0.801
GO:0035280	miRNA loading onto RISC involved in gene silencing by miRNA	-2.7471	0.777	0.804
GO:0006336	DNA replication-independent nucleosome assembly	-2.5686	0.84	0.804
GO:0032212	positive regulation of telomere maintenance via telomerase	-2.8697	0.748	0.805
GO:0034508	centromere complex assembly	-2.9706	0.855	0.806
GO:0043486	histone exchange	-2.5817	0.892	0.806
GO:0010770	positive regulation of cell morphogenesis involved in differentiation	-2.5482	0.771	0.809
GO:0033523	histone H2B ubiquitination	-3.0862	0.859	0.81
GO:0045739	positive regulation of DNA repair	-2.9706	0.779	0.812
GO:0042220	response to cocaine	-2.7905	0.889	0.812
GO:0070192	chromosome organization involved in meiotic cell cycle	-2.585	0.846	0.815
GO:0000187	activation of MAPK activity	-2.8894	0.741	0.817
GO:0002761	regulation of myeloid leukocyte differentiation	-2.9469	0.832	0.818
GO:0000387	spliceosomal snRNP assembly	-3.9208	0.843	0.822
GO:0060965	negative regulation of gene silencing by miRNA	-2.8327	0.811	0.825
GO:0009267	cellular response to starvation	-2.5884	0.889	0.826
GO:0006323	DNA packaging	-2.5638	0.889	0.826
GO:0048041	focal adhesion assembly	-2.9547	0.888	0.833
GO:0033146	regulation of intracellular estrogen receptor signaling pathway	-3.301	0.826	0.835
GO:0032092	positive regulation of protein binding	-2.7282	0.933	0.84
GO:0035278	miRNA mediated inhibition of translation	-2.8297	0.835	0.841
GO:0021782	glial cell development	-2.6757	0.893	0.846
GO:0060412	ventricular septum morphogenesis	-2.6253	0.898	0.852
GO:0043392	negative regulation of DNA binding	-2.9914	0.932	0.856
GO:2001251	negative regulation of chromosome organization	-2.8069	0.817	0.857
GO:0030833	regulation of actin filament polymerization	-2.5784	0.77	0.859
GO:0097421	liver regeneration	-2.6459	0.921	0.864
GO:0002489	antigen processing and presentation of endogenous peptide antigen via MHC class Ib via ER pathway, TAP-dependent	-3.1427	0.964	0.867
GO:0060765	regulation of androgen receptor signaling pathway	-3.1079	0.829	0.867
GO:0008286	insulin receptor signaling pathway	-2.6345	0.818	0.869
GO:0005978	glycogen biosynthetic process	-2.5952	0.916	0.87
GO:0034101	erythrocyte homeostasis	-2.6556	0.917	0.871
GO:1904153	negative regulation of retrograde protein transport, ER to cytosol	-2.7305	0.7	0.874
GO:0048011	neurotrophin TRK receptor signaling pathway	-3.1079	0.861	0.877
GO:0032968	positive regulation of transcription elongation from RNA polymerase II promoter	-2.6596	0.879	0.878
GO:0033144	negative regulation of intracellular steroid hormone receptor signaling pathway	-2.6716	0.8	0.881
GO:0042992	negative regulation of transcription factor import into nucleus	-2.8386	0.849	0.882
GO:0043537	negative regulation of blood vessel endothelial cell migration	-3.3372	0.853	0.883
GO:0060998	regulation of dendritic spine development	-2.5901	0.803	0.884
GO:2000810	regulation of bicellular tight junction assembly	-2.9706	0.863	0.886
GO:0032211	negative regulation of telomere maintenance via telomerase	-2.7282	0.759	0.887
GO:0045732	positive regulation of protein catabolic process	-2.6576	0.825	0.888
GO:1900006	positive regulation of dendrite development	-2.767	0.772	0.89
GO:0061136	regulation of proteasomal protein catabolic process	-3.0088	0.849	0.894
GO:0048639	positive regulation of developmental growth	-3.0969	0.863	0.894
Cellular Component
GO_term_ID	description	log10 p-value	uniqueness	dispensability
GO:0005925	focal adhesion	-300	0.966	0
GO:0009295	nucleoid	-1.9838	0.994	0
GO:0030904	retromer complex	-3.9208	0.744	0
GO:0097470	ribbon synapse	-2.0101	0.981	0
GO:0090543	Flemming body	-2.9245	0.991	0.002
GO:0043220	Schmidt-Lanterman incisure	-2.1427	0.984	0.002
GO:0030139	endocytic vesicle	-3.6198	0.884	0.002
GO:0032154	cleavage furrow	-3.3565	0.988	0.002
GO:0005903	brush border	-2.4473	0.991	0.002
GO:0030425	dendrite	-3.3979	0.89	0.003
GO:0031252	cell leading edge	-1.3389	0.99	0.003
GO:0005622	intracellular	-1.5089	0.992	0.006
GO:0005652	nuclear lamina	-1.6258	0.886	0.023
GO:0016528	sarcoplasm	-3.1675	0.964	0.041
GO:0043231	intracellular membrane-bounded organelle	-2.821	0.943	0.058
GO:0042629	mast cell granule	-1.9355	0.93	0.064
GO:0033116	endoplasmic reticulum-Golgi intermediate compartment membrane	-2.1818	0.884	0.072
GO:0005793	endoplasmic reticulum-Golgi intermediate compartment	-2.9747	0.931	0.075
GO:0043228	non-membrane-bounded organelle	-1.7926	0.967	0.089
GO:0019898	extrinsic component of membrane	-3.0044	0.959	0.115
GO:0034365	discoidal high-density lipoprotein particle	-3.6198	0.856	0.121
GO:0005829	cytosol	-300	0.926	0.126
GO:0035068	micro-ribonucleoprotein complex	-3.6198	0.821	0.13
GO:0005845	mRNA cap binding complex	-1.8465	0.852	0.137
GO:0034518	RNA cap binding complex	-2.1427	0.856	0.138
GO:0042101	T cell receptor complex	-2.5591	0.818	0.141
GO:0071556	integral component of lumenal side of endoplasmic reticulum membrane	-3.5086	0.843	0.173
GO:0000785	chromatin	-3.9208	0.689	0.183
GO:0005739	mitochondrion	-3.699	0.912	0.188
GO:0055087	Ski complex	-2.0964	0.814	0.192
GO:0071664	catenin-TCF7L2 complex	-1.608	0.8	0.192
GO:0071818	BAT3 complex	-3.6198	0.808	0.192
GO:0005850	eukaryotic translation initiation factor 2 complex	-1.608	0.811	0.196
GO:0005853	eukaryotic translation elongation factor 1 complex	-2.4123	0.811	0.196
GO:0097452	GAIT complex	-1.608	0.829	0.196
GO:1990726	Lsm1-7-Pat1 complex	-1.9389	0.829	0.196
GO:0070552	BRISC complex	-2.0101	0.793	0.199
GO:0070695	FHF complex	-2.0101	0.809	0.199
GO:0097255	R2TP complex	-2.0101	0.827	0.199
GO:1990393	3M complex	-2.0101	0.827	0.199
GO:0000445	THO complex part of transcription export complex	-2.4123	0.791	0.201
GO:0005851	eukaryotic translation initiation factor 2B complex	-1.406	0.807	0.201
GO:0070937	CRD-mediated mRNA stability complex	-1.406	0.807	0.201
GO:0070531	BRCA1-A complex	-2.8153	0.789	0.203
GO:0071541	eukaryotic translation initiation factor 3 complex, eIF3m	-2.0964	0.805	0.203
GO:0099023	tethering complex	-2.9747	0.841	0.205
GO:0031209	SCAR complex	-3.2147	0.803	0.205
GO:0002199	zona pellucida receptor complex	-2.451	0.82	0.207
GO:0071141	SMAD protein complex	-2.451	0.815	0.207
GO:0030877	beta-catenin destruction complex	-2.2596	0.799	0.21
GO:0017101	aminoacyl-tRNA synthetase multienzyme complex	-2.5884	0.812	0.211
GO:0032797	SMN complex	-2.757	0.812	0.211
GO:0034719	SMN-Sm protein complex	-2.8447	0.793	0.216
GO:0005852	eukaryotic translation initiation factor 3 complex	-1.5611	0.793	0.217
GO:0090665	glycoprotein complex	-1.4883	0.811	0.22
GO:0032993	protein-DNA complex	-1.4432	0.83	0.226
GO:0008023	transcription elongation factor complex	-3.7212	0.732	0.236
GO:0035145	exon-exon junction complex	-2.8447	0.773	0.236
GO:0005635	nuclear envelope	-2.7282	0.814	0.238
GO:0001891	phagocytic cup	-2.3458	0.94	0.244
GO:0008180	COP9 signalosome	-2.3526	0.766	0.245
GO:0043235	receptor complex	-1.7333	0.821	0.246
GO:0042645	mitochondrial nucleoid	-1.9838	0.841	0.248
GO:0031519	PcG protein complex	-3.4685	0.762	0.251
GO:0001772	immunological synapse	-2.129	0.938	0.254
GO:0072686	mitotic spindle	-3.5528	0.828	0.26
GO:0005577	fibrinogen complex	-2.8097	0.814	0.27
GO:0030018	Z disc	-3.8539	0.826	0.276
GO:0044798	nuclear transcription factor complex	-3.4559	0.728	0.277
GO:0000502	proteasome complex	-3.3565	0.724	0.284
GO:0005839	proteasome core complex	-2.3363	0.744	0.905
GO:0070603	SWI/SNF superfamily-type complex	-1.9722	0.753	0.286
GO:0032156	septin cytoskeleton	-1.7474	0.889	0.291
GO:1990745	EARP complex	-2.8097	0.756	0.299
GO:0071007	U2-type catalytic step 2 spliceosome	-2.6038	0.766	0.335
GO:0005790	smooth endoplasmic reticulum	-2.129	0.897	0.34
GO:0033290	eukaryotic 48S preinitiation complex	-1.6258	0.817	0.348
GO:0016282	eukaryotic 43S preinitiation complex	-1.6258	0.817	0.955
GO:0030289	protein phosphatase 4 complex	-1.608	0.81	0.35
GO:0030863	cortical cytoskeleton	-2.6757	0.817	0.357
GO:0070993	translation preinitiation complex	-1.9389	0.816	0.357
GO:0032059	bleb	-1.323	0.941	0.359
GO:0016529	sarcoplasmic reticulum	-1.9477	0.892	0.362
GO:0099055	integral component of postsynaptic membrane	-1.9389	0.927	0.368
GO:0042272	nuclear RNA export factor complex	-1.608	0.777	0.369
GO:0031371	ubiquitin conjugating enzyme complex	-3.2147	0.754	0.371
GO:0031428	box C/D snoRNP complex	-2.8153	0.743	0.372
GO:0070062	extracellular exosome	-300	0.906	0.373
GO:0070971	endoplasmic reticulum exit site	-1.5219	0.883	0.376
GO:0036038	MKS complex	-2.9208	0.735	0.377
GO:0032021	NELF complex	-3.2147	0.769	0.377
GO:0000176	nuclear exosome (RNase complex)	-2.1427	0.763	0.377
GO:0032433	filopodium tip	-2.644	0.926	0.379
GO:0071437	invadopodium	-2.0655	0.939	0.379
GO:0005968	Rab-protein geranylgeranyltransferase complex	-1.608	0.784	0.382
GO:0005757	mitochondrial permeability transition pore complex	-1.608	0.777	0.386
GO:0097386	glial cell projection	-1.4865	0.938	0.387
GO:0005964	phosphorylase kinase complex	-2.0101	0.768	0.388
GO:0031143	pseudopodium	-2.2823	0.938	0.389
GO:0005798	Golgi-associated vesicle	-3.2218	0.847	0.394
GO:0001725	stress fiber	-2.9431	0.837	0.398
GO:1904949	ATPase complex	-1.3884	0.793	0.402
GO:0097504	Gemini of coiled bodies	-2.757	0.862	0.403
GO:0042382	paraspeckles	-1.406	0.866	0.403
GO:0042470	melanosome	-3.3279	0.893	0.404
GO:0005592	collagen type XI trimer	-1.406	0.814	0.406
GO:0005856	cytoskeleton	-3.5686	0.848	0.409
GO:0000938	GARP complex	-1.9389	0.756	0.413
GO:0097418	neurofibrillary tangle	-2.8153	0.936	0.414
GO:0005654	nucleoplasm	-300	0.813	0.416
GO:0030867	rough endoplasmic reticulum membrane	-2.2	0.844	0.419
GO:0030906	retromer, cargo-selective complex	-1.608	0.769	0.421
GO:1990604	IRE1-TRAF2-ASK1 complex	-1.608	0.743	0.421
GO:0030666	endocytic vesicle membrane	-3.0706	0.814	0.424
GO:0000242	pericentriolar material	-2.2336	0.834	0.429
GO:0015629	actin cytoskeleton	-2.3036	0.847	0.43
GO:0031265	CD95 death-inducing signaling complex	-1.406	0.766	0.433
GO:0045261	proton-transporting ATP synthase complex, catalytic core F(1)	-2.0101	0.775	0.433
GO:0005901	caveola	-2.7545	0.905	0.441
GO:0030135	coated vesicle	-1.9147	0.884	0.447
GO:0034098	VCP-NPL4-UFD1 AAA ATPase complex	-2.8097	0.729	0.448
GO:0044754	autolysosome	-1.6258	0.934	0.449
GO:0036513	Derlin-1 retrotranslocation complex	-2.9431	0.725	0.454
GO:0030124	AP-4 adaptor complex	-2.0101	0.749	0.458
GO:0031093	platelet alpha granule lumen	-2.8125	0.819	0.462
GO:0005871	kinesin complex	-2.0737	0.706	0.467
GO:0005788	endoplasmic reticulum lumen	-2.5969	0.831	0.468
GO:0044615	nuclear pore nuclear basket	-2.4123	0.76	0.471
GO:0005681	spliceosomal complex	-3.4318	0.734	0.473
GO:0070761	pre-snoRNP complex	-1.7474	0.821	0.473
GO:0034708	methyltransferase complex	-3.1675	0.751	0.474
GO:0098576	lumenal side of membrane	-1.406	0.9	0.476
GO:0030140	trans-Golgi network transport vesicle	-1.7279	0.843	0.483
GO:0005726	perichromatin fibrils	-2.0101	0.759	0.483
GO:0042827	platelet dense granule	-1.4883	0.885	0.483
GO:0005641	nuclear envelope lumen	-2.3507	0.86	0.484
GO:0070578	RISC-loading complex	-3.2147	0.766	0.484
GO:0045111	intermediate filament cytoskeleton	-1.9747	0.856	0.487
GO:0048188	Set1C/COMPASS complex	-2.9208	0.737	0.488
GO:1990752	microtubule end	-1.3224	0.837	0.492
GO:0048500	signal recognition particle	-1.9389	0.802	0.493
GO:0000444	MIS12/MIND type complex	-1.608	0.733	0.494
GO:0016442	RISC complex	-2.8097	0.815	0.497
GO:0098858	actin-based cell projection	-1.6107	0.926	0.501
GO:0035253	ciliary rootlet	-1.5597	0.803	0.508
GO:0005875	microtubule associated complex	-2.2007	0.686	0.511
GO:0032587	ruffle membrane	-2.4056	0.86	0.513
GO:0005768	endosome	-2.8697	0.849	0.518
GO:0070187	telosome	-2.4123	0.743	0.518
GO:0001741	XY body	-2.9208	0.863	0.52
GO:0005685	U1 snRNP	-2.5591	0.769	0.523
GO:0005697	telomerase holoenzyme complex	-3.1308	0.772	0.527
GO:0032588	trans-Golgi network membrane	-2.4401	0.852	0.528
GO:0005664	nuclear origin of replication recognition complex	-2.451	0.717	0.53
GO:0005832	chaperonin-containing T-complex	-2.8097	0.79	0.531
GO:0000152	nuclear ubiquitin ligase complex	-2.4202	0.726	0.533
GO:0030133	transport vesicle	-2.4202	0.86	0.54
GO:0044294	dendritic growth cone	-1.6258	0.915	0.541
GO:0098936	intrinsic component of postsynaptic membrane	-1.9389	0.927	0.545
GO:0032040	small-subunit processome	-2.7645	0.798	0.548
GO:0010369	chromocenter	-3.2596	0.836	0.551
GO:0031011	Ino80 complex	-3.3279	0.654	0.555
GO:0000812	Swr1 complex	-2.8097	0.704	0.912
GO:0000803	sex chromosome	-2.0685	0.86	0.555
GO:0044450	microtubule organizing center part	-1.7768	0.809	0.556
GO:0005689	U12-type spliceosomal complex	-2.1537	0.767	0.558
GO:0031467	Cul7-RING ubiquitin ligase complex	-2.0101	0.789	0.558
GO:0005642	annulate lamellae	-2.0101	0.909	0.559
GO:0010494	cytoplasmic stress granule	-2.5406	0.737	0.56
GO:0031465	Cul4B-RING E3 ubiquitin ligase complex	-2.0101	0.785	0.567
GO:0044292	dendrite terminus	-1.7889	0.913	0.569
GO:0030891	VCB complex	-2.0101	0.771	0.574
GO:0035327	transcriptionally active chromatin	-3.4318	0.748	0.575
GO:0035869	ciliary transition zone	-2.3516	0.863	0.575
GO:0098797	plasma membrane protein complex	-3.2518	0.707	0.578
GO:0043296	apical junction complex	-3.2596	0.969	0.582
GO:0097440	apical dendrite	-1.5006	0.916	0.588
GO:0010008	endosome membrane	-2.5452	0.795	0.589
GO:0097550	transcriptional preinitiation complex	-1.406	0.862	0.589
GO:0005828	kinetochore microtubule	-1.7474	0.846	0.595
GO:0031462	Cul2-RING ubiquitin ligase complex	-2.2596	0.777	0.596
GO:0097422	tubular endosome	-2.0101	0.869	0.6
GO:0031466	Cul5-RING ubiquitin ligase complex	-1.7474	0.782	0.601
GO:0000795	synaptonemal complex	-2.3372	0.78	0.603
GO:0005834	heterotrimeric G-protein complex	-3.301	0.67	0.605
GO:0035748	myelin sheath abaxonal region	-1.406	0.984	0.605
GO:0035749	myelin sheath adaxonal region	-1.406	0.984	0.605
GO:0043292	contractile fiber	-1.5433	0.84	0.606
GO:0072687	meiotic spindle	-1.9389	0.852	0.608
GO:0097546	ciliary base	-1.719	0.87	0.615
GO:0000120	RNA polymerase I transcription factor complex	-2.0101	0.745	0.615
GO:0035976	transcription factor AP-1 complex	-2.0101	0.779	0.615
GO:0031264	death-inducing signaling complex	-2.451	0.76	0.616
GO:0005720	nuclear heterochromatin	-3.0315	0.714	0.618
GO:0005916	fascia adherens	-2.8097	0.971	0.62
GO:0070822	Sin3-type complex	-1.49	0.679	0.621
GO:0042612	MHC class I protein complex	-1.4962	0.759	0.621
GO:0031089	platelet dense granule lumen	-1.7889	0.838	0.624
GO:0000127	transcription factor TFIIIC complex	-1.406	0.782	0.624
GO:0097431	mitotic spindle pole	-3.2518	0.847	0.631
GO:0097165	nuclear stress granule	-2.0101	0.764	0.632
GO:0044295	axonal growth cone	-1.3064	0.902	0.635
GO:0070022	transforming growth factor beta receptor complex	-1.608	0.757	0.638
GO:0090576	RNA polymerase III transcription factor complex	-1.9389	0.773	0.638
GO:0070013	intracellular organelle lumen	-2.9747	0.854	0.639
GO:0097542	ciliary tip	-1.3646	0.865	0.64
GO:0005764	lysosome	-1.4462	0.909	0.64
GO:0000323	lytic vacuole	-1.4462	0.909	0.919
GO:0005719	nuclear euchromatin	-2.4157	0.725	0.64
GO:0061695	transferase complex, transferring phosphorus-containing groups	-2.2765	0.737	0.641
GO:0098793	presynapse	-2.5834	0.922	0.641
GO:0030056	hemidesmosome	-1.406	0.976	0.646
GO:0043232	intracellular non-membrane-bounded organelle	-1.7926	0.837	0.648
GO:0035631	CD40 receptor complex	-1.5597	0.823	0.649
GO:0042825	TAP complex	-3.1308	0.741	0.651
GO:0098562	cytoplasmic side of membrane	-1.5277	0.942	0.654
GO:0016010	dystrophin-associated glycoprotein complex	-1.4883	0.746	0.657
GO:0031616	spindle pole centrosome	-1.7889	0.847	0.663
GO:0033276	transcription factor TFTC complex	-3.6021	0.676	0.668
GO:0005911	cell-cell junction	-1.6538	0.972	0.668
GO:0005840	ribosome	-1.4976	0.702	0.67
GO:0098556	cytoplasmic side of rough endoplasmic reticulum membrane	-1.406	0.859	0.671
GO:0051233	spindle midzone	-1.7279	0.839	0.671
GO:0030057	desmosome	-1.919	0.971	0.672
GO:0005736	DNA-directed RNA polymerase I complex	-3.5528	0.7	0.674
GO:0031232	extrinsic component of external side of plasma membrane	-2.0964	0.923	0.675
GO:0033267	axon part	-2.5498	0.889	0.676
GO:0036064	ciliary basal body	-1.6511	0.759	0.687
GO:0000930	gamma-tubulin complex	-1.7075	0.719	0.688
GO:0032777	Piccolo NuA4 histone acetyltransferase complex	-1.608	0.723	0.689
GO:0022626	cytosolic ribosome	-1.4211	0.71	0.69
GO:0055037	recycling endosome	-2.4789	0.866	0.691
GO:0005905	clathrin-coated pit	-2.2612	0.904	0.691
GO:0016342	catenin complex	-1.9389	0.754	0.693
GO:0000776	kinetochore	-1.9352	0.669	0.693
GO:0019908	nuclear cyclin-dependent protein kinase holoenzyme complex	-1.9404	0.704	0.696
GO:0000793	condensed chromosome	-2.3706	0.835	0.697
GO:1904115	axon cytoplasm	-2.3458	0.846	0.703
GO:0034451	centriolar satellite	-1.9208	0.831	0.704
GO:0071439	clathrin complex	-1.323	0.757	0.706
GO:0000243	commitment complex	-1.323	0.783	0.706
GO:0005915	zonula adherens	-1.6258	0.971	0.707
GO:0005876	spindle microtubule	-3.3468	0.821	0.707
GO:0005869	dynactin complex	-1.323	0.736	0.708
GO:0005952	cAMP-dependent protein kinase complex	-1.323	0.776	0.711
GO:0016593	Cdc73/Paf1 complex	-1.323	0.709	0.713
GO:0071682	endocytic vesicle lumen	-2.2336	0.841	0.714
GO:0030478	actin cap	-1.608	0.829	0.717
GO:0019774	proteasome core complex, beta-subunit complex	-1.3224	0.786	0.721
GO:0008021	synaptic vesicle	-1.9059	0.806	0.722
GO:0030175	filopodium	-1.6929	0.927	0.727
GO:0034709	methylosome	-1.8465	0.766	0.727
GO:0005665	DNA-directed RNA polymerase II, core complex	-3.0757	0.722	0.728
GO:0043204	perikaryon	-1.5945	0.935	0.73
GO:0016589	NURF complex	-1.7474	0.776	0.738
GO:0000940	condensed chromosome outer kinetochore	-1.7889	0.715	0.738
GO:0031105	septin complex	-1.406	0.73	0.739
GO:0043005	neuron projection	-2.2848	0.891	0.74
GO:0030424	axon	-1.5196	0.895	0.746
GO:0043034	costamere	-1.4865	0.848	0.747
GO:0044666	MLL3/4 complex	-1.6258	0.743	0.748
GO:0001650	fibrillar center	-3.2366	0.804	0.749
GO:0036379	myofilament	-1.3064	0.847	0.75
GO:0005865	striated muscle thin filament	-1.4883	0.821	0.755
GO:0005861	troponin complex	-1.323	0.722	0.926
GO:0016235	aggresome	-1.8752	0.974	0.757
GO:0071564	npBAF complex	-2.9208	0.769	0.759
GO:0071565	nBAF complex	-1.5006	0.729	0.92
GO:0005785	signal recognition particle receptor complex	-2.0964	0.72	0.761
GO:0033503	HULC complex	-1.608	0.676	0.761
GO:0019897	extrinsic component of plasma membrane	-1.4185	0.923	0.761
GO:0000794	condensed nuclear chromosome	-2.0501	0.769	0.763
GO:0005913	cell-cell adherens junction	-3.7959	0.968	0.764
GO:0000778	condensed nuclear chromosome kinetochore	-1.5597	0.705	0.767
GO:0044304	main axon	-1.5258	0.894	0.774
GO:0098687	chromosomal region	-1.624	0.8	0.775
GO:0034366	spherical high-density lipoprotein particle	-1.7889	0.844	0.777
GO:0030673	axolemma	-1.9519	0.852	0.781
GO:0044224	juxtaparanode region of axon	-1.8465	0.906	0.782
GO:0030669	clathrin-coated endocytic vesicle membrane	-3.3565	0.825	0.782
GO:0070382	exocytic vesicle	-1.9	0.863	0.799
GO:0030118	clathrin coat	-1.5891	0.729	0.802
GO:0043195	terminal bouton	-1.327	0.884	0.805
GO:0000781	chromosome, telomeric region	-1.7726	0.806	0.809
GO:0000780	condensed nuclear chromosome, centromeric region	-1.7147	0.784	0.811
GO:0030670	phagocytic vesicle membrane	-1.764	0.825	0.813
GO:0016591	DNA-directed RNA polymerase II, holoenzyme	-2.1002	0.687	0.813
GO:0000214	tRNA-intron endonuclease complex	-2.1427	0.779	0.815
GO:0031901	early endosome membrane	-1.6992	0.815	0.819
GO:0034362	low-density lipoprotein particle	-1.7147	0.838	0.827
GO:0008024	cyclin/CDK positive transcription elongation factor complex	-2.0964	0.704	0.828
GO:0019907	cyclin-dependent protein kinase activating kinase holoenzyme complex	-1.6258	0.718	0.902
GO:0005686	U2 snRNP	-1.9767	0.77	0.828
GO:0031464	Cul4A-RING E3 ubiquitin ligase complex	-1.8465	0.776	0.833
GO:0009898	cytoplasmic side of plasma membrane	-2.51	0.913	0.835
GO:0000123	histone acetyltransferase complex	-2.1537	0.699	0.836
GO:0045335	phagocytic vesicle	-2.6308	0.879	0.84
GO:0005671	Ada2/Gcn5/Ada3 transcription activator complex	-2.3507	0.7	0.841
GO:0005721	pericentric heterochromatin	-2.2336	0.736	0.841
GO:0030665	clathrin-coated vesicle membrane	-2.3089	0.822	0.842
GO:0030687	preribosome, large subunit precursor	-2.4157	0.804	0.845
GO:0032391	photoreceptor connecting cilium	-1.5535	0.853	0.845
GO:0008540	proteasome regulatory particle, base subcomplex	-2.1427	0.756	0.847
GO:0031597	cytosolic proteasome complex	-1.5219	0.737	0.847
GO:0045334	clathrin-coated endocytic vesicle	-1.4959	0.877	0.851
GO:0000125	PCAF complex	-2.4123	0.719	0.852
GO:0030122	AP-2 adaptor complex	-2.1427	0.656	0.853
GO:0031429	box H/ACA snoRNP complex	-2.4123	0.703	0.853
GO:0072589	box H/ACA scaRNP complex	-1.608	0.73	0.986
GO:0090661	box H/ACA telomerase RNP complex	-1.608	0.786	0.986
GO:0000942	condensed nuclear chromosome outer kinetochore	-1.608	0.719	0.856
GO:0097526	spliceosomal tri-snRNP complex	-2.0155	0.763	0.857
GO:0001739	sex chromatin	-1.406	0.743	0.858
GO:0000275	mitochondrial proton-transporting ATP synthase complex, catalytic core F(1)	-1.608	0.741	0.86
GO:0005669	transcription factor TFIID complex	-1.3646	0.669	0.861
GO:0030660	Golgi-associated vesicle membrane	-1.309	0.827	0.868
GO:0045263	proton-transporting ATP synthase complex, coupling factor F(o)	-1.5597	0.764	0.868
GO:0032839	dendrite cytoplasm	-2.172	0.858	0.878
GO:0034361	very-low-density lipoprotein particle	-1.3224	0.835	0.881
GO:0034385	triglyceride-rich lipoprotein particle	-1.3224	0.835	0.904
GO:0005862	muscle thin filament tropomyosin	-1.608	0.837	0.884
GO:0030864	cortical actin cytoskeleton	-2.3028	0.795	0.887
GO:0000124	SAGA complex	-2.0655	0.698	0.887
GO:0030131	clathrin adaptor complex	-1.4889	0.735	0.887
GO:0030132	clathrin coat of coated pit	-1.4074	0.696	0.889
GO:0016013	syntrophin complex	-1.608	0.77	0.89
GO:0030914	STAGA complex	-2.9208	0.702	0.893
GO:0000836	Hrd1p ubiquitin ligase complex	-2.0101	0.728	0.893
	uniqueness: The value representing how different a GO term is in relation to other terms
	dispensability: The value representing the degree of GO term redundancy and enrichment

## Sheet: GO_LOSSES_RAW
Supplementary Table vIc: Enriched gene ontologies for proteins involved in egdetic losses prior to REVIGO pruning
Molecular functions
GO.ID	P-value
GO:0005515	< 1e-30
GO:0003723	< 1e-30
GO:0042802	< 1e-30
GO:0031625	< 1e-30
GO:0045296	< 1e-30
GO:0003682	1.2e-29
GO:0019904	1.4e-26
GO:0005524	4e-24
GO:0008134	3.8e-22
GO:0019901	6.3e-21
GO:0000978	8.2e-19
GO:0003713	3.8e-18
GO:0003735	2.7e-15
GO:0001077	1.2e-14
GO:0008270	4.1e-14
GO:0050681	3.9e-12
GO:0000980	5.3e-12
GO:0042393	7.9e-12
GO:0019899	4.2e-11
GO:0004402	1.3e-10
GO:0003714	1.9e-10
GO:0046982	2.4e-10
GO:0008022	6.9e-10
GO:0051082	7.6e-10
GO:0005200	1e-09
GO:0042826	1.5e-09
GO:0043021	2.4e-09
GO:0030374	6.7e-09
GO:0004674	6.7e-09
GO:0043130	7.2e-09
GO:0019903	8.1e-09
GO:0030621	8.7e-09
GO:0003697	1.1e-08
GO:0044212	1.3e-08
GO:0003684	1.9e-08
GO:0008094	2.9e-08
GO:0003725	3.1e-08
GO:0031490	6.6e-08
GO:0061630	7e-08
GO:0003727	1.3e-07
GO:0047485	1.4e-07
GO:1990841	1.7e-07
GO:0031492	4.4e-07
GO:0001784	5.6e-07
GO:0070888	6.9e-07
GO:0017070	8.1e-07
GO:0002039	1.2e-06
GO:0004715	1.5e-06
GO:0035035	1.7e-06
GO:1990381	1.8e-06
GO:0001047	3.1e-06
GO:0001054	3.3e-06
GO:0035064	3.3e-06
GO:0001046	3.3e-06
GO:0051879	3.4e-06
GO:0030331	3.5e-06
GO:0048156	4.2e-06
GO:0005080	5.1e-06
GO:0070491	5.7e-06
GO:0003924	6.4e-06
GO:0019843	8.1e-06
GO:0001205	9e-06
GO:0051087	9.5e-06
GO:0030983	1e-05
GO:0001085	1e-05
GO:0043425	1.2e-05
GO:0042803	1.5e-05
GO:0061631	2.4e-05
GO:0030622	2.5e-05
GO:0051117	2.8e-05
GO:0070412	3e-05
GO:0033613	3.4e-05
GO:0043015	3.5e-05
GO:0016922	3.7e-05
GO:0070742	3.7e-05
GO:0019789	4.1e-05
GO:0017025	4.7e-05
GO:0070530	6.2e-05
GO:0004843	6.4e-05
GO:0004386	6.9e-05
GO:0044548	7.7e-05
GO:0000989	9.1e-05
GO:0001102	9.6e-05
GO:0001227	0.00011
GO:0005525	0.00014
GO:0046976	0.00015
GO:0004879	0.00015
GO:0003756	0.00016
GO:0001223	0.00016
GO:0031072	0.00017
GO:0046966	0.00017
GO:0008013	0.00017
GO:0046965	0.00019
GO:0070182	0.00019
GO:0035497	0.00019
GO:0050780	0.0002
GO:0140097	0.00021
GO:0001078	0.00024
GO:0005158	0.00025
GO:0070628	0.00025
GO:0001228	0.00025
GO:0017124	0.00031
GO:0046875	0.00031
GO:0000287	0.00032
GO:0003730	0.00033
GO:0051787	0.00033
GO:0042054	0.00034
GO:0017162	0.00035
GO:0035197	0.00035
GO:0051219	0.00037
GO:0031593	0.00038
GO:0042809	0.00041
GO:0035259	0.00041
GO:0005070	0.00044
GO:0003743	0.00044
GO:0070410	0.00045
GO:0070411	0.00045
GO:0003680	0.00045
GO:0001104	0.00048
GO:0003705	0.0005
GO:0008536	0.00053
GO:0002020	0.00056
GO:0008017	0.00059
GO:0032183	0.00067
GO:0008327	0.00067
GO:0035198	0.00069
GO:0051287	0.00076
GO:0000977	0.00078
GO:0043531	0.0008
GO:0004004	0.00084
GO:0070975	0.00085
GO:0032404	0.00085
GO:0097027	0.00085
GO:0070878	0.00085
GO:0043008	0.00087
GO:0070064	0.00097
GO:0030291	0.00103
GO:0042162	0.00104
GO:0001076	0.00105
GO:0030544	0.00113
GO:0043565	0.00127
GO:0070990	0.00135
GO:0042800	0.00135
GO:0000400	0.00135
GO:0001056	0.00135
GO:0051721	0.00141
GO:0051020	0.0015
GO:0008092	0.00151
GO:0003678	0.00152
GO:0048027	0.00158
GO:1990837	0.00163
GO:0019003	0.00178
GO:0046934	0.0018
GO:0043022	0.00181
GO:0048365	0.00181
GO:0050321	0.00181
GO:0004697	0.00187
GO:0098641	0.00187
GO:0048487	0.00202
GO:0031821	0.00206
GO:0030346	0.00206
GO:0050785	0.00206
GO:0030235	0.00206
GO:0035184	0.00206
GO:0016435	0.00206
GO:0030674	0.00212
GO:0004407	0.00214
GO:0051019	0.00217
GO:0003746	0.00217
GO:0045309	0.00217
GO:0035173	0.0022
GO:0045294	0.00221
GO:0001094	0.00221
GO:0098505	0.00221
GO:0008641	0.00221
GO:0070016	0.00221
GO:0036459	0.00231
GO:0004712	0.00233
GO:0004693	0.00244
GO:0000993	0.00244
GO:0016779	0.0026
GO:0034236	0.00269
GO:0005161	0.00269
GO:0005159	0.00269
GO:0070577	0.00288
GO:0019900	0.00319
GO:0001221	0.00352
GO:0001882	0.00359
GO:0016274	0.00375
GO:0016801	0.00375
GO:0004702	0.00386
GO:0008135	0.00398
GO:0004812	0.00399
GO:0051059	0.00414
GO:0003729	0.00427
GO:0031683	0.0044
GO:0004842	0.00451
GO:0000979	0.00478
GO:0001055	0.00485
GO:0016886	0.00485
GO:0017136	0.00497
GO:0019788	0.00499
GO:0043140	0.00499
GO:0000403	0.00499
GO:0004691	0.00499
GO:0032135	0.00499
GO:0005168	0.00499
GO:0010997	0.00499
GO:0000995	0.00499
GO:0031491	0.00503
GO:0035326	0.00505
GO:0016303	0.00525
GO:0004865	0.00529
GO:0004535	0.00529
GO:0003857	0.00529
GO:0019902	0.00535
GO:0003707	0.00568
GO:0070717	0.00584
GO:0004713	0.0062
GO:0070063	0.00635
GO:0001158	0.0066
GO:0004675	0.00671
GO:0008656	0.00671
GO:0043028	0.00688
GO:0001848	0.00695
GO:0035255	0.00695
GO:0005504	0.00695
GO:0008026	0.00715
GO:0017166	0.00767
GO:0031996	0.00767
GO:0032041	0.00767
GO:0051018	0.00797
GO:0008301	0.00799
GO:0051536	0.008
GO:0005154	0.00806
GO:0046332	0.00837
GO:0051015	0.00838
GO:0030971	0.0085
GO:0032395	0.0085
GO:0045182	0.0086
GO:0017112	0.00868
GO:0001105	0.00873
GO:0033218	0.00895
GO:0034185	0.00909
GO:0051010	0.01022
GO:0050700	0.01022
GO:0005527	0.01022
GO:0005528	0.01022
GO:0008565	0.01029
GO:0032356	0.01053
GO:0004887	0.01053
GO:0008469	0.01053
GO:1990247	0.01053
GO:0051400	0.01053
GO:1902282	0.01053
GO:0008187	0.01083
GO:0000983	0.01083
GO:0001540	0.01105
GO:0070325	0.01148
GO:0008139	0.01148
GO:0043027	0.01148
GO:0061659	0.01172
GO:0001091	0.01203
GO:0000990	0.01204
GO:0010385	0.01207
GO:0005047	0.01207
GO:0086083	0.01207
GO:0051525	0.01207
GO:0043426	0.01207
GO:0004826	0.01207
GO:0032405	0.01207
GO:0032407	0.01207
GO:0003923	0.01207
GO:0044388	0.01207
GO:0038132	0.01207
GO:0070883	0.01207
GO:0097100	0.01207
GO:0061665	0.01207
GO:0004707	0.01242
GO:0043024	0.01242
GO:0004003	0.01264
GO:0016279	0.01288
GO:0097718	0.01319
GO:0042277	0.01331
GO:0010485	0.01426
GO:0004716	0.01541
GO:0046974	0.01541
GO:0034713	0.01541
GO:0001013	0.01541
GO:0001163	0.01541
GO:0001164	0.01541
GO:0031690	0.01577
GO:0005487	0.01577
GO:0003712	0.01584
GO:0016655	0.01696
GO:0043621	0.01696
GO:0050750	0.01697
GO:0019888	0.01745
GO:0070034	0.01792
GO:0008171	0.01792
GO:0042605	0.01815
GO:0018024	0.0183
GO:0019208	0.0185
GO:0005048	0.01875
GO:0016278	0.01929
GO:0030957	0.01941
GO:0043422	0.01941
GO:0097617	0.01941
GO:0047035	0.01941
GO:0043560	0.01941
GO:0043548	0.01954
GO:0015036	0.01973
GO:0003755	0.01986
GO:0060590	0.01992
GO:0044389	0.01999
GO:0032813	0.02058
GO:0032357	0.02256
GO:0015379	0.02256
GO:0003909	0.02256
GO:0004668	0.02256
GO:0047025	0.02256
GO:0055105	0.02256
GO:0050815	0.02256
GO:0035242	0.02256
GO:0017002	0.02256
GO:0030620	0.02256
GO:0036402	0.02256
GO:0003696	0.02256
GO:0032794	0.02256
GO:0050998	0.02256
GO:0003688	0.02256
GO:0001190	0.02476
GO:0031267	0.02483
GO:0001846	0.02499
GO:0005123	0.02499
GO:0008143	0.02499
GO:0016874	0.02572
GO:0000988	0.02671
GO:0097602	0.02682
GO:0047144	0.02682
GO:0017016	0.02782
GO:0005003	0.02816
GO:0032549	0.02863
GO:0003677	0.02871
GO:0005484	0.02903
GO:0070039	0.02921
GO:0005030	0.02921
GO:0004719	0.02921
GO:0010484	0.02921
GO:0099609	0.02921
GO:0048408	0.02921
GO:0044020	0.02921
GO:0038085	0.02921
GO:0031852	0.02921
GO:0004525	0.02921
GO:0032138	0.02921
GO:0071535	0.02921
GO:0032296	0.02921
GO:0008428	0.02921
GO:0001025	0.02921
GO:0001026	0.02921
GO:0004090	0.02921
GO:0005143	0.02921
GO:0070815	0.02921
GO:0051425	0.02921
GO:0051434	0.02921
GO:0035877	0.02921
GO:0001156	0.02921
GO:0009378	0.02921
GO:0042296	0.02921
GO:0015056	0.02921
GO:0042169	0.02946
GO:0031624	0.02982
GO:0016538	0.03024
GO:0001103	0.03026
GO:0002162	0.03041
GO:0019869	0.03041
GO:0000774	0.03041
GO:0004965	0.03041
GO:1990825	0.03041
GO:0003691	0.03041
GO:0016803	0.03041
GO:0019199	0.03116
GO:0004714	0.03156
GO:0005068	0.03607
GO:0048407	0.03607
GO:0045295	0.03607
GO:0050786	0.03607
GO:0001222	0.03607
GO:0044325	0.03629
GO:0004861	0.04007
GO:0048185	0.04007
GO:0004385	0.04007
GO:0015037	0.04007
GO:0017022	0.04031
GO:0016859	0.04107
GO:0043274	0.04282
GO:0016667	0.04319
GO:0035257	0.04372
GO:0071837	0.04464
GO:0098599	0.04464
GO:0008474	0.04464
GO:0017069	0.0453
GO:0034237	0.04576
GO:0044877	0.04595
GO:0043236	0.046
GO:0005164	0.04625
GO:0017160	0.04634
GO:0030165	0.0472
GO:0019237	0.04749
GO:1990948	0.04749
GO:0031748	0.04749
GO:0003910	0.04749
GO:0034594	0.04749
GO:0034513	0.04749
GO:0001083	0.04749
GO:0001007	0.04749
GO:0035174	0.04749
GO:1990763	0.04749
GO:0097371	0.04749
GO:0047134	0.04749
GO:0070087	0.04749
GO:0003954	0.05115
GO:0097110	0.05189
GO:0032947	0.05206
GO:0050136	0.05286
GO:0008137	0.05286
GO:0004197	0.05298
GO:0019955	0.05385
GO:0008408	0.05592
GO:0015197	0.0568
GO:0019838	0.0577
GO:0036002	0.05817
GO:0004722	0.05845
GO:0017151	0.05863
GO:0005024	0.05863
GO:0005049	0.05863
GO:0008035	0.05863
GO:0019784	0.05863
GO:0000340	0.05863
GO:0042609	0.05863
GO:0070404	0.05863
GO:0008494	0.05863
GO:0070181	0.05863
GO:0051920	0.05863
GO:0035256	0.05863
GO:0071936	0.05863
GO:0000014	0.05863
GO:0008603	0.05863
GO:0016248	0.05997
GO:0003779	0.06089
GO:0034061	0.06177
GO:0004869	0.06251
GO:0030332	0.06356
GO:0008157	0.06356
GO:0042974	0.06504
GO:0030515	0.06531
GO:0005072	0.0654
GO:0043495	0.0654
GO:0001849	0.0654
GO:0015377	0.0654
GO:0097157	0.0654
GO:0005522	0.0654
GO:0005057	0.06819
GO:0004536	0.06833
GO:0005385	0.06858
GO:0051213	0.0691
GO:0008093	0.06941
GO:0031543	0.06941
GO:0031994	0.06941
GO:0030898	0.06941
GO:0001134	0.06941
GO:0051537	0.07001
GO:0043398	0.07066
GO:0030942	0.07066
GO:0004727	0.07066
GO:0016509	0.07066
GO:1903135	0.07066
GO:0031720	0.07066
GO:1904928	0.07066
GO:1905773	0.07066
GO:0034739	0.07066
GO:0004817	0.07066
GO:0031826	0.07066
GO:0043120	0.07066
GO:0035939	0.07066
GO:0099077	0.07066
GO:0000404	0.07066
GO:0032142	0.07066
GO:0004699	0.07066
GO:0032137	0.07066
GO:0032139	0.07066
GO:0050211	0.07066
GO:0005471	0.07066
GO:0047086	0.07066
GO:0016941	0.07066
GO:0047023	0.07066
GO:0001093	0.07066
GO:0008475	0.07066
GO:0008426	0.07066
GO:0004052	0.07066
GO:0015207	0.07066
GO:0005134	0.07066
GO:0004013	0.07066
GO:0050816	0.07066
GO:0071074	0.07066
GO:0016314	0.07066
GO:0042903	0.07066
GO:0061821	0.07066
GO:0004392	0.07066
GO:0004348	0.07066
GO:0070548	0.07066
GO:0051120	0.07066
GO:0003886	0.07066
GO:0070644	0.07066
GO:0018636	0.07066
GO:0004142	0.07066
GO:0035651	0.07066
GO:0001224	0.07066
GO:0045322	0.07066
GO:0016822	0.07066
GO:0016823	0.07066
GO:0070051	0.07066
GO:0016802	0.07066
GO:0016504	0.07082
GO:0030742	0.07124
GO:0047372	0.0716
GO:0050431	0.07216
GO:0008266	0.07216
GO:0031418	0.07216
GO:0000339	0.07255
GO:0051427	0.07278
GO:0016879	0.07395
GO:0005516	0.07595
GO:0008200	0.08404
GO:0004672	0.08471
GO:0048306	0.08533
GO:0003690	0.08683
GO:0044769	0.08713
GO:0019207	0.08873
GO:0031369	0.09029
GO:0044390	0.09036
GO:0016790	0.09411
GO:0000049	0.09657
GO:0032452	0.0968
GO:0003785	0.0968
GO:0001098	0.09713
GO:0001099	0.09713
GO:0042799	0.09776
GO:0001727	0.09776
GO:0005007	0.09776
GO:0097506	0.09776
GO:0051575	0.09776
GO:0004844	0.09776
GO:0004839	0.09776
GO:0031802	0.09776
GO:0071532	0.09776
GO:0008379	0.09776
GO:0030292	0.09776
GO:0030284	0.09776
GO:0001030	0.09776
GO:0001031	0.09776
GO:0043559	0.09776
GO:0098639	0.09776
GO:0080084	0.09776
GO:0050544	0.09776
GO:0019960	0.09776
GO:0009008	0.09776
GO:0097109	0.09776
GO:0030618	0.09776
GO:0004448	0.09776
GO:0034485	0.09776
GO:0044547	0.09776
GO:0033592	0.09776
GO:0071889	0.10009
GO:0017134	0.10337
GO:0036442	0.10337
GO:0016881	0.10337
GO:0019787	0.10534
GO:0046961	0.10658
GO:0001671	0.10658
GO:0052745	0.10658
GO:0000976	0.10871
GO:0098631	0.10899
GO:0051880	0.10983
GO:0005021	0.10983
GO:0005004	0.10983
GO:0008079	0.10983
GO:0019798	0.10983
GO:0003964	0.10983
GO:0004679	0.10983
GO:0008312	0.10983
GO:0001016	0.10983
GO:0004032	0.10983
GO:0098634	0.10983
GO:0034046	0.10983
GO:0036310	0.10983
GO:0003720	0.10983
GO:0003747	0.10983
GO:0005547	0.11094
GO:0034062	0.1111
GO:0097747	0.1111
GO:0000149	0.11146
GO:0031489	0.11242
GO:0003899	0.1135
GO:0008144	0.11413
GO:0019209	0.1142
GO:0019905	0.1142
GO:0097153	0.11475
GO:0005521	0.11475
GO:0031435	0.11475
GO:0035613	0.11475
GO:0016595	0.11506
GO:0046972	0.11506
GO:0070513	0.11506
GO:0030619	0.11506
GO:0043995	0.11506
GO:0043996	0.11506
GO:0098748	0.11634
GO:0052743	0.11634
GO:0034450	0.11634
GO:0034452	0.11634
GO:0035615	0.11634
GO:0036041	0.11672
GO:0052659	0.11672
GO:0043023	0.11672
GO:0061608	0.11672
GO:0016301	0.1172
GO:0044183	0.12059
GO:0042805	0.12472
GO:0016702	0.12577
GO:0004683	0.13119
GO:0005198	0.13832
GO:0008353	0.1428
GO:0019956	0.1428
GO:0000146	0.14899
GO:0070273	0.14899
GO:0015035	0.14899
GO:0005246	0.14913
GO:0016706	0.15534
GO:0140104	0.15544
GO:0030275	0.16213
GO:0030506	0.16213
GO:0051539	0.16263
GO:0016701	0.16361
GO:0046933	0.16901
GO:0017081	0.16901
GO:0046527	0.16901
GO:0019107	0.17094
GO:0001729	0.17094
GO:0030984	0.17094
GO:0004793	0.17094
GO:0016524	0.17094
GO:0010309	0.17094
GO:0031762	0.17094
GO:0031753	0.17094
GO:0031755	0.17094
GO:0004731	0.17094
GO:0010465	0.17094
GO:0071796	0.17094
GO:1990932	0.17094
GO:0001884	0.17094
GO:0045155	0.17094
GO:0050497	0.17094
GO:0019781	0.17094
GO:0019785	0.17094
GO:0046969	0.17094
GO:0035034	0.17094
GO:0045142	0.17094
GO:0072354	0.17094
GO:0046970	0.17094
GO:0038052	0.17094
GO:0004874	0.17094
GO:0004825	0.17094
GO:0004816	0.17094
GO:0004819	0.17094
GO:0050405	0.17094
GO:0030366	0.17094
GO:0032427	0.17094
GO:0008941	0.17094
GO:0060698	0.17094
GO:0002114	0.17094
GO:0002134	0.17094
GO:0047620	0.17094
GO:0004516	0.17094
GO:0000406	0.17094
GO:0098770	0.17094
GO:0032181	0.17094
GO:0032129	0.17094
GO:0032143	0.17094
GO:0042610	0.17094
GO:0004666	0.17094
GO:0004651	0.17094
GO:0031691	0.17094
GO:0034512	0.17094
GO:0016005	0.17094
GO:0016990	0.17094
GO:1990404	0.17094
GO:0004609	0.17094
GO:0015140	0.17094
GO:0015130	0.17094
GO:0047057	0.17094
GO:0098808	0.17094
GO:0070180	0.17094
GO:0016900	0.17094
GO:0008425	0.17094
GO:0005169	0.17094
GO:0001018	0.17094
GO:0005150	0.17094
GO:0005153	0.17094
GO:0045519	0.17094
GO:0004066	0.17094
GO:0001002	0.17094
GO:0001003	0.17094
GO:0004087	0.17094
GO:0004088	0.17094
GO:0035402	0.17094
GO:0035403	0.17094
GO:1990259	0.17094
GO:0047977	0.17094
GO:0036009	0.17094
GO:0004031	0.17094
GO:0000701	0.17094
GO:0016362	0.17094
GO:0061752	0.17094
GO:0032810	0.17094
GO:0034057	0.17094
GO:0097363	0.17094
GO:0061749	0.17094
GO:0004923	0.17094
GO:0032551	0.17094
GO:0017098	0.17094
GO:0016418	0.17094
GO:0019972	0.17094
GO:0033149	0.17094
GO:0016436	0.17094
GO:0034986	0.17094
GO:0034988	0.17094
GO:0019912	0.17094
GO:0061849	0.17094
GO:0070853	0.17094
GO:0047322	0.17094
GO:0019948	0.17094
GO:0008781	0.17094
GO:0016150	0.17094
GO:0008732	0.17094
GO:0030580	0.17094
GO:0097199	0.17094
GO:0004360	0.17094
GO:0004357	0.17094
GO:0046817	0.17094
GO:0004372	0.17094
GO:0004379	0.17094
GO:0044715	0.17094
GO:0004315	0.17094
GO:0016263	0.17094
GO:0036461	0.17094
GO:0030623	0.17094
GO:0030617	0.17094
GO:0004450	0.17094
GO:1902271	0.17094
GO:0035800	0.17094
GO:0035596	0.17094
GO:0001160	0.17094
GO:0001181	0.17094
GO:0033857	0.17094
GO:0001147	0.17094
GO:0016774	0.17094
GO:0034458	0.17094
GO:0035500	0.17094
GO:0016708	0.17094
GO:0008650	0.17094
GO:0004146	0.17094
GO:0031177	0.17094
GO:0140031	0.17094
GO:0042281	0.17094
GO:0000991	0.17094
GO:0000992	0.17094
GO:0001225	0.17094
GO:0019144	0.17094
GO:0047787	0.17094
GO:0070026	0.17094
GO:0008757	0.17257
GO:0035254	0.1752
GO:0019104	0.17601
GO:0005041	0.17601
GO:0003887	0.18001
GO:0008307	0.18114
GO:0000982	0.18185
GO:0030295	0.18198
GO:0046030	0.18296
GO:0086008	0.18296
GO:0032454	0.18296
GO:0042577	0.18296
GO:0005344	0.18296
GO:0043522	0.18296
GO:0071617	0.18732
GO:0042171	0.18732
GO:0019829	0.18777
GO:0017056	0.18906
GO:0055106	0.18907
GO:0086080	0.18956
GO:0004862	0.18956
GO:0004576	0.18956
GO:0000182	0.18956
GO:0051011	0.18956
GO:0001075	0.18956
GO:0042975	0.18956
GO:0033170	0.18956
GO:0070567	0.18956
GO:0097200	0.18956
GO:0003689	0.18956
GO:0140030	0.19105
GO:0043175	0.19438
GO:0098847	0.19469
GO:0005025	0.19503
GO:0086089	0.19503
GO:0001851	0.19503
GO:0031749	0.19503
GO:0004814	0.19503
GO:0004833	0.19503
GO:0030375	0.19503
GO:0008934	0.19503
GO:0047696	0.19503
GO:0003989	0.19503
GO:0004583	0.19503
GO:0003945	0.19503
GO:0004514	0.19503
GO:0031544	0.19503
GO:0004656	0.19503
GO:0031697	0.19503
GO:0031698	0.19503
GO:0097016	0.19503
GO:0035368	0.19503
GO:0015183	0.19503
GO:0004605	0.19503
GO:0051021	0.19503
GO:0044323	0.19503
GO:0052832	0.19503
GO:0052833	0.19503
GO:0052834	0.19503
GO:0034648	0.19503
GO:0070137	0.19503
GO:0070139	0.19503
GO:0010861	0.19503
GO:0036042	0.19503
GO:0036033	0.19503
GO:0008169	0.19503
GO:1904288	0.19503
GO:0000700	0.19503
GO:0031014	0.19503
GO:0016361	0.19503
GO:0034056	0.19503
GO:0005222	0.19503
GO:0004952	0.19503
GO:0043532	0.19503
GO:0032554	0.19503
GO:2001069	0.19503
GO:0035243	0.19503
GO:0071987	0.19503
GO:0051430	0.19503
GO:0015616	0.19503
GO:0047115	0.19503
GO:0004430	0.19503
GO:0001129	0.19503
GO:0001132	0.19503
GO:0004176	0.19503
GO:0030060	0.19503
GO:0034191	0.19503
GO:0008607	0.19503
GO:0034186	0.19503
GO:0004726	0.19516
GO:0016681	0.19516
GO:0031545	0.19516
GO:0000150	0.19516
GO:0034618	0.19516
GO:0015205	0.19516
GO:0008121	0.19516
GO:0015556	0.19516
GO:0004300	0.19516
GO:0003831	0.19516
GO:0008553	0.19516
GO:0001162	0.19516
GO:0052742	0.1976
GO:0019238	0.19829
GO:0046975	0.19829
GO:0003988	0.19829
GO:0048273	0.19829
GO:0000405	0.19829
GO:0005345	0.19829
GO:0004630	0.19829
GO:1990405	0.19829
GO:0015288	0.19829
GO:0001042	0.19829
GO:0045545	0.19829
GO:0004075	0.19829
GO:1990226	0.19829
GO:1990239	0.19829
GO:0052658	0.19829
GO:0043515	0.19829
GO:0004920	0.19829
GO:0050542	0.19829
GO:0050543	0.19829
GO:0050693	0.19829
GO:0019958	0.19829
GO:0031386	0.19829
GO:0004301	0.19829
GO:0004445	0.19829
GO:0060228	0.19829
GO:0034190	0.19829
GO:0090079	0.19876
GO:1901567	0.19876
GO:0008170	0.20029
GO:0015631	0.20032
GO:0001106	0.20663
GO:0004532	0.20836
GO:0019887	0.20888
GO:0019200	0.20919
GO:0030145	0.21718
GO:0016247	0.21882
GO:0005540	0.22045
GO:0046983	0.22228
GO:0001191	0.22752
GO:0019212	0.22862
GO:0032451	0.22978
GO:0099106	0.23047
GO:0030228	0.23268
GO:0016887	0.23456
GO:0140096	0.23539
GO:0004864	0.24038
GO:0016772	0.2405
GO:0017091	0.24125
GO:0016651	0.24144
GO:0070279	0.24477
GO:0004708	0.24602
GO:0005545	0.24602
GO:0019894	0.25017
GO:0016620	0.25413
GO:0001968	0.25472
GO:0019205	0.25622
GO:0019842	0.25876
GO:0016668	0.26068
GO:0004832	0.26068
GO:0003906	0.26068
GO:0005388	0.26068
GO:0016004	0.26068
GO:0004520	0.2626
GO:0030234	0.26424
GO:0033764	0.26768
GO:0030296	0.26939
GO:1901981	0.27413
GO:0042287	0.27496
GO:0017154	0.27697
GO:0008097	0.27697
GO:0019855	0.27697
GO:0035325	0.27697
GO:0015271	0.27697
GO:0044213	0.27697
GO:0061578	0.27697
GO:0001161	0.27697
GO:0032934	0.28119
GO:0050840	0.28468
GO:0016853	0.2878
GO:0030276	0.2883
GO:0005085	0.2897
GO:0016679	0.29527
GO:0004579	0.29527
GO:0008429	0.29527
GO:0008510	0.29527
GO:0016885	0.29527
GO:0016832	0.29527
GO:0030170	0.29778
GO:0030554	0.29955
GO:0030881	0.30323
GO:0003841	0.30523
GO:0016831	0.30523
GO:0070851	0.30758
GO:0016411	0.30934
GO:0008276	0.31012
GO:0005031	0.31533
GO:0005035	0.31533
GO:0019201	0.31533
GO:0010340	0.31624
GO:0004723	0.31624
GO:0034235	0.31624
GO:0004703	0.31624
GO:0046935	0.31624
GO:0019870	0.31624
GO:0003916	0.31624
GO:0004645	0.31624
GO:0031628	0.31624
GO:0051998	0.31624
GO:0008443	0.31624
GO:0008199	0.31624
GO:0004030	0.31624
GO:0097322	0.31624
GO:0004908	0.31624
GO:0016421	0.31624
GO:0032050	0.31624
GO:0032051	0.31624
Biological Processes	P-value
GO:0045944	< 1e-30
GO:0000122	< 1e-30
GO:0006614	2.8e-27
GO:0000184	2.6e-26
GO:0016032	3.2e-25
GO:0019083	7.7e-24
GO:0016579	1e-21
GO:0097711	1.8e-21
GO:0006413	9.8e-20
GO:1901796	4.2e-16
GO:0010389	5.5e-16
GO:0050852	6.6e-16
GO:0051301	2.1e-14
GO:0006977	1.3e-13
GO:0045815	4.5e-13
GO:0006457	1.2e-12
GO:0031295	1.5e-12
GO:0006367	1.6e-12
GO:0051092	2.1e-12
GO:0070317	3.5e-12
GO:1902036	4.4e-12
GO:0043123	8.6e-12
GO:0000398	1.2e-11
GO:0038095	1.7e-11
GO:0045893	2.9e-11
GO:0006338	3.1e-11
GO:0050821	4.5e-11
GO:0048013	6.4e-11
GO:0030521	1.5e-10
GO:1902187	2.8e-10
GO:0033138	7.4e-10
GO:2001244	1.5e-09
GO:0016567	2.2e-09
GO:0006364	2.4e-09
GO:0043066	5.4e-09
GO:0046777	5.5e-09
GO:1901224	6.7e-09
GO:0000060	7.4e-09
GO:0060964	8.7e-09
GO:0043967	1.7e-08
GO:0006281	1.8e-08
GO:0045652	2.3e-08
GO:0042795	2.4e-08
GO:0035019	2.9e-08
GO:0000289	3.3e-08
GO:0018105	3.7e-08
GO:0051290	5e-08
GO:0006298	6.1e-08
GO:0043966	6.4e-08
GO:0018107	6.9e-08
GO:0007062	7.3e-08
GO:0006919	9.9e-08
GO:0006368	1e-07
GO:0007050	1.1e-07
GO:0045892	1.1e-07
GO:0008283	1.3e-07
GO:0043388	1.4e-07
GO:0000183	1.5e-07
GO:0042059	1.6e-07
GO:0070498	1.7e-07
GO:0043044	2e-07
GO:0051091	2.1e-07
GO:0042769	2.1e-07
GO:0061418	2.2e-07
GO:0045814	2.3e-07
GO:0002181	2.4e-07
GO:0043065	2.4e-07
GO:0051726	2.6e-07
GO:0045727	2.8e-07
GO:0007049	2.9e-07
GO:0032508	3.1e-07
GO:0090090	3.9e-07
GO:0061077	4.5e-07
GO:0006303	4.5e-07
GO:1900034	5.6e-07
GO:0006283	5.7e-07
GO:0032092	6.1e-07
GO:0038128	6.2e-07
GO:0006406	6.7e-07
GO:0035518	7.6e-07
GO:0000715	7.6e-07
GO:0006361	7.7e-07
GO:1901216	7.8e-07
GO:0006511	8.3e-07
GO:0001701	9e-07
GO:0043161	9.7e-07
GO:0043488	1e-06
GO:0006335	1.4e-06
GO:0071480	1.6e-06
GO:0060333	1.6e-06
GO:0051437	1.6e-06
GO:1904837	1.6e-06
GO:0032212	1.6e-06
GO:0090263	1.7e-06
GO:0071550	1.7e-06
GO:0022618	1.7e-06
GO:0031145	1.9e-06
GO:0006974	2e-06
GO:0038096	2.2e-06
GO:0006915	2.2e-06
GO:0016055	2.4e-06
GO:0071407	2.7e-06
GO:0046597	2.7e-06
GO:0050690	2.7e-06
GO:0007568	2.9e-06
GO:0031398	2.9e-06
GO:0006342	3e-06
GO:0042127	3.2e-06
GO:0008543	3.5e-06
GO:0002223	3.5e-06
GO:0006513	3.6e-06
GO:0042789	3.7e-06
GO:0045736	5.5e-06
GO:0048538	5.5e-06
GO:0016573	6.1e-06
GO:0032922	6.7e-06
GO:0051436	6.8e-06
GO:0070527	6.8e-06
GO:0008625	7.7e-06
GO:0045116	8.3e-06
GO:0032435	8.7e-06
GO:0043433	8.8e-06
GO:0016925	9.2e-06
GO:0032481	1.2e-05
GO:0006362	1.3e-05
GO:0006363	1.3e-05
GO:0006325	1.3e-05
GO:0006352	1.4e-05
GO:0000082	1.4e-05
GO:0001942	1.6e-05
GO:0046627	1.7e-05
GO:0070987	1.8e-05
GO:0008630	1.9e-05
GO:0006284	1.9e-05
GO:0001666	1.9e-05
GO:0000086	2.1e-05
GO:0001818	2.1e-05
GO:0009267	2.1e-05
GO:0032897	2.2e-05
GO:0097527	2.4e-05
GO:0010255	2.4e-05
GO:0060071	2.5e-05
GO:0070911	2.7e-05
GO:0042147	2.8e-05
GO:0030010	3.2e-05
GO:0071364	3.4e-05
GO:0051897	3.5e-05
GO:0000209	3.6e-05
GO:0007052	3.6e-05
GO:0006334	3.6e-05
GO:0043507	3.7e-05
GO:0043968	3.8e-05
GO:2001235	3.9e-05
GO:0044030	4e-05
GO:1902176	4e-05
GO:0032728	4e-05
GO:0042771	4.1e-05
GO:0001843	4.7e-05
GO:0070059	4.8e-05
GO:1990090	4.9e-05
GO:0000077	5.2e-05
GO:0002576	5.3e-05
GO:0070534	5.4e-05
GO:0097193	5.4e-05
GO:0035722	5.4e-05
GO:0045903	5.8e-05
GO:0006297	5.9e-05
GO:0010888	5.9e-05
GO:0035329	6e-05
GO:0031124	6.9e-05
GO:0043525	6.9e-05
GO:0043536	6.9e-05
GO:0048146	6.9e-05
GO:0045070	7.4e-05
GO:2000036	7.4e-05
GO:2000059	7.4e-05
GO:0042276	7.4e-05
GO:0035270	7.7e-05
GO:0007010	8.4e-05
GO:0051291	8.5e-05
GO:1900272	8.5e-05
GO:0006337	8.6e-05
GO:1990000	8.6e-05
GO:0010614	8.6e-05
GO:0006369	8.8e-05
GO:0010667	8.8e-05
GO:0000470	8.8e-05
GO:0030335	8.9e-05
GO:0006294	9e-05
GO:0042273	9.1e-05
GO:0010638	9.7e-05
GO:1900740	0.00011
GO:0010971	0.00012
GO:0000244	0.00012
GO:0008284	0.00012
GO:0042994	0.00012
GO:0007179	0.00013
GO:0010165	0.00014
GO:2000002	0.00014
GO:0032463	0.00014
GO:0071816	0.00014
GO:0009952	0.00014
GO:0036498	0.00014
GO:0038061	0.00015
GO:0035635	0.00015
GO:0030111	0.00016
GO:0007283	0.00016
GO:0032436	0.00016
GO:0030307	0.00016
GO:0048010	0.00017
GO:0010972	0.00017
GO:0031058	0.00017
GO:0009411	0.00017
GO:0000187	0.00017
GO:0045197	0.00017
GO:0000731	0.00017
GO:0060561	0.00017
GO:0006260	0.00018
GO:0043312	0.00018
GO:0016575	0.00018
GO:1902043	0.00019
GO:0071803	0.00019
GO:0090647	0.00019
GO:0097296	0.00019
GO:0048208	0.00019
GO:0010803	0.00021
GO:0042493	0.00022
GO:0006986	0.00022
GO:0030433	0.00023
GO:0010501	0.00023
GO:0071901	0.00023
GO:0034644	0.00023
GO:0032872	0.00023
GO:2000810	0.00023
GO:0006309	0.00024
GO:0070932	0.00024
GO:0045934	0.00025
GO:0031532	0.00025
GO:0031623	0.00025
GO:0097191	0.00026
GO:0055013	0.00027
GO:0006296	0.00027
GO:0008285	0.00027
GO:0034614	0.00028
GO:0048469	0.00029
GO:0071392	0.00029
GO:0097421	0.00029
GO:0042733	0.00029
GO:0031497	0.0003
GO:0008584	0.0003
GO:0001934	0.00031
GO:0034329	0.00031
GO:0000245	0.00031
GO:0043923	0.00032
GO:0060965	0.00032
GO:0035690	0.00032
GO:0031663	0.00033
GO:0006417	0.00033
GO:0060544	0.00034
GO:0031333	0.00034
GO:0022417	0.00034
GO:0032471	0.00034
GO:1900453	0.00034
GO:2000378	0.00035
GO:0043392	0.00036
GO:0060338	0.00037
GO:0000281	0.00037
GO:0051098	0.00039
GO:1903078	0.00039
GO:1904874	0.0004
GO:0043124	0.00041
GO:0048588	0.00041
GO:0043954	0.00042
GO:0060766	0.00044
GO:2000049	0.00044
GO:0097284	0.00044
GO:0006403	0.00044
GO:0010508	0.00044
GO:0070734	0.00044
GO:1900182	0.00045
GO:0009303	0.00047
GO:0006110	0.00047
GO:2000104	0.00047
GO:2000678	0.00047
GO:0043011	0.00047
GO:0009611	0.00048
GO:0045667	0.00048
GO:0043409	0.0005
GO:0006275	0.0005
GO:0034080	0.00051
GO:0021782	0.00051
GO:0017148	0.00053
GO:0051090	0.00053
GO:0043154	0.00053
GO:0008593	0.00053
GO:0032088	0.00053
GO:1903146	0.00053
GO:0010332	0.00054
GO:0003281	0.00054
GO:0045739	0.00057
GO:0035987	0.00057
GO:0030866	0.00057
GO:0030100	0.00059
GO:0045471	0.0006
GO:1903827	0.00062
GO:0043687	0.00062
GO:1902186	0.00063
GO:0043537	0.00064
GO:0042346	0.00064
GO:0019048	0.00064
GO:0019886	0.00065
GO:0046827	0.00065
GO:0031573	0.00065
GO:0034116	0.00065
GO:0018027	0.00065
GO:0009950	0.00065
GO:0035067	0.00065
GO:0007100	0.00065
GO:0043666	0.00065
GO:0032743	0.00066
GO:0000717	0.00066
GO:0000278	0.00067
GO:0030900	0.00067
GO:0002224	0.00068
GO:0051973	0.0007
GO:0043524	0.00072
GO:0007173	0.00072
GO:0007098	0.00076
GO:0003151	0.00076
GO:0007596	0.00077
GO:1904646	0.00077
GO:0032770	0.00077
GO:0070301	0.00077
GO:0031146	0.00077
GO:0071260	0.00078
GO:0032200	0.00079
GO:0006282	0.00081
GO:0051444	0.00081
GO:0009615	0.00081
GO:0070423	0.00081
GO:0031396	0.00081
GO:0032410	0.00082
GO:0032786	0.00083
GO:0060765	0.00083
GO:2001171	0.00083
GO:0050847	0.00083
GO:0046600	0.00083
GO:0070842	0.00083
GO:1904871	0.00083
GO:0032071	0.00083
GO:0061857	0.00083
GO:2000334	0.00083
GO:1903376	0.00083
GO:2000587	0.00083
GO:0002506	0.00083
GO:0000492	0.00083
GO:0030952	0.00083
GO:0071316	0.00084
GO:0032968	0.00084
GO:0032927	0.00084
GO:0033044	0.00087
GO:0050775	0.00088
GO:0006396	0.00092
GO:0006978	0.00093
GO:0071360	0.00093
GO:0097242	0.00093
GO:0031397	0.00095
GO:0036297	0.00095
GO:0006336	0.00096
GO:0070897	0.00097
GO:0060213	0.00097
GO:0060546	0.00097
GO:0070601	0.00097
GO:0031581	0.00097
GO:0150003	0.00097
GO:0051573	0.00097
GO:0090085	0.00097
GO:0048255	0.00098
GO:0008286	0.00099
GO:0072132	0.00099
GO:0060251	0.00101
GO:0070507	0.00102
GO:0032091	0.00102
GO:0001824	0.00103
GO:0007030	0.00103
GO:0043624	0.00108
GO:0060412	0.00108
GO:0038083	0.0011
GO:0042254	0.0011
GO:1905897	0.00113
GO:0060998	0.00113
GO:0071230	0.00113
GO:0051259	0.00113
GO:0045454	0.00115
GO:0010628	0.00116
GO:0048333	0.00117
GO:0033598	0.00118
GO:0006886	0.00121
GO:0007265	0.00122
GO:2000178	0.00123
GO:2000679	0.00123
GO:0043243	0.00125
GO:0042542	0.00126
GO:0031098	0.00128
GO:0065003	0.00129
GO:0000165	0.0013
GO:0070828	0.00131
GO:0001829	0.00131
GO:0032495	0.00131
GO:0051532	0.00131
GO:0042921	0.00131
GO:0042692	0.00133
GO:0042981	0.00134
GO:0045787	0.00135
GO:0043552	0.00135
GO:0035066	0.00135
GO:0035666	0.00135
GO:0001649	0.00137
GO:0031330	0.00137
GO:0007080	0.00139
GO:0002573	0.0014
GO:0033077	0.00143
GO:0001568	0.00144
GO:0034968	0.00145
GO:0097194	0.00146
GO:0051298	0.00147
GO:0048546	0.00151
GO:0051567	0.00151
GO:0000460	0.00151
GO:0071459	0.00152
GO:1902895	0.00152
GO:0007130	0.00152
GO:0032727	0.00152
GO:0038111	0.00152
GO:0042177	0.00155
GO:0016570	0.00158
GO:0018108	0.0016
GO:0051321	0.0016
GO:0006998	0.00162
GO:1901655	0.00165
GO:1903322	0.00166
GO:0070936	0.00167
GO:0030449	0.00169
GO:0051028	0.00169
GO:0051054	0.00172
GO:0046784	0.00176
GO:0045198	0.00176
GO:0035278	0.00176
GO:0033127	0.00176
GO:0042992	0.00178
GO:0030522	0.00178
GO:2000144	0.00179
GO:0070198	0.0018
GO:0000028	0.00181
GO:0030511	0.00181
GO:0071695	0.00182
GO:0010942	0.00186
GO:1902275	0.00192
GO:0006458	0.00192
GO:0002064	0.00198
GO:0046826	0.00202
GO:1901533	0.00202
GO:1904290	0.00202
GO:0006678	0.00202
GO:0051096	0.00202
GO:0061048	0.00202
GO:1904999	0.00202
GO:1905050	0.00202
GO:0071376	0.00202
GO:1905344	0.00202
GO:0051987	0.00202
GO:0035405	0.00202
GO:0035280	0.00202
GO:1903862	0.00202
GO:0016255	0.00202
GO:0036462	0.00202
GO:0006370	0.00203
GO:2000008	0.00203
GO:0006383	0.00205
GO:0050434	0.00205
GO:1904353	0.00209
GO:0050995	0.00209
GO:0035116	0.00209
GO:0000732	0.00209
GO:0050680	0.00211
GO:0007519	0.00213
GO:0010799	0.00213
GO:2001267	0.00214
GO:2001200	0.00216
GO:0051409	0.00216
GO:0007084	0.00216
GO:1990416	0.00216
GO:0045653	0.00216
GO:1903960	0.00216
GO:0090281	0.00216
GO:0051304	0.00218
GO:0010970	0.00219
GO:0007093	0.0022
GO:0034097	0.0022
GO:0030324	0.00221
GO:0061041	0.00223
GO:0006900	0.00227
GO:0034612	0.00228
GO:0034380	0.0023
GO:0035162	0.0023
GO:0045830	0.0023
GO:0010634	0.00232
GO:0048738	0.00233
GO:0006359	0.00234
GO:0046688	0.00234
GO:0030261	0.00234
GO:0030970	0.00234
GO:0031109	0.00235
GO:0035265	0.00236
GO:0071345	0.00237
GO:0001890	0.0024
GO:0035051	0.00241
GO:0042752	0.00244
GO:0071398	0.00245
GO:0016239	0.00246
GO:0048661	0.00247
GO:0032653	0.00249
GO:0001892	0.00249
GO:0032729	0.0025
GO:0001756	0.00254
GO:0006879	0.00254
GO:0032970	0.00255
GO:0050869	0.00257
GO:0021955	0.00257
GO:0007254	0.00259
GO:0008356	0.0026
GO:0045732	0.00262
GO:0006122	0.00262
GO:0034975	0.00262
GO:0070972	0.00263
GO:2001234	0.00264
GO:0032147	0.00268
GO:0007004	0.0027
GO:0032206	0.00271
GO:0060045	0.00278
GO:0000729	0.00278
GO:0043401	0.00285
GO:0006606	0.00291
GO:0046854	0.00293
GO:0030855	0.00294
GO:0045665	0.00296
GO:0022612	0.00296
GO:0031062	0.00297
GO:1901890	0.00297
GO:0032205	0.00297
GO:0022406	0.00304
GO:0071158	0.00305
GO:0070192	0.00305
GO:0007276	0.00308
GO:0034605	0.0031
GO:0040008	0.00312
GO:0090503	0.00313
GO:0042149	0.00313
GO:0051568	0.00318
GO:0036294	0.00321
GO:0060334	0.00322
GO:0006266	0.00322
GO:0045910	0.00322
GO:0000185	0.00322
GO:0051101	0.00326
GO:0000724	0.00329
GO:0000723	0.00338
GO:0046824	0.00339
GO:0048566	0.00339
GO:1900407	0.00346
GO:0051457	0.00346
GO:0042053	0.00346
GO:0002363	0.00346
GO:1903421	0.00346
GO:0007077	0.0035
GO:0097305	0.00354
GO:1901990	0.00357
GO:0010718	0.00358
GO:0048708	0.00358
GO:0035264	0.00359
GO:0046825	0.00361
GO:0031063	0.00363
GO:0051131	0.00363
GO:0042104	0.00363
GO:0002183	0.00363
GO:0045672	0.00363
GO:0007566	0.00365
GO:0031054	0.00366
GO:2001241	0.00366
GO:0098915	0.00366
GO:0060742	0.00366
GO:0071372	0.00366
GO:0035404	0.00366
GO:0035246	0.00366
GO:0045899	0.00366
GO:2000615	0.00366
GO:0033160	0.00366
GO:0021987	0.00367
GO:0050732	0.0037
GO:0014910	0.00371
GO:0032413	0.00374
GO:0032480	0.00374
GO:1900024	0.00374
GO:0018208	0.00374
GO:0045646	0.00374
GO:0045740	0.00376
GO:0044786	0.00377
GO:0051865	0.00377
GO:0045071	0.00378
GO:0051443	0.00382
GO:0001822	0.00382
GO:0016236	0.00385
GO:0007411	0.0039
GO:0008361	0.00399
GO:0070979	0.00399
GO:0002053	0.00399
GO:0010565	0.00406
GO:0060021	0.00406
GO:0030901	0.00406
GO:0048524	0.00408
GO:0071241	0.00411
GO:0034976	0.00418
GO:0042345	0.00419
GO:0043542	0.00422
GO:0002562	0.00424
GO:0060322	0.00425
GO:0045936	0.00426
GO:1904294	0.00426
GO:0006907	0.00426
GO:0043369	0.00426
GO:0098780	0.00426
GO:0072594	0.00427
GO:0048863	0.00427
GO:0051640	0.00431
GO:0071108	0.00431
GO:1903311	0.00437
GO:0070830	0.0045
GO:0030850	0.00452
GO:0030177	0.00455
GO:2001237	0.00455
GO:0051225	0.00458
GO:0019079	0.00465
GO:0031061	0.00472
GO:0046599	0.00473
GO:0019827	0.00473
GO:0051223	0.00474
GO:1901253	0.00475
GO:0003266	0.00475
GO:0031340	0.00475
GO:1904378	0.00475
GO:0014010	0.00475
GO:0006348	0.00475
GO:0031442	0.00475
GO:1901671	0.00475
GO:1904851	0.00475
GO:0006924	0.00475
GO:0061890	0.00475
GO:1900044	0.00475
GO:0045357	0.00475
GO:2000370	0.00475
GO:2000319	0.00475
GO:1903069	0.00475
GO:0035878	0.00475
GO:0002634	0.00475
GO:0033182	0.00475
GO:1903936	0.00475
GO:0098722	0.00475
GO:0070997	0.00475
GO:0030501	0.00483
GO:0048568	0.00485
GO:0072332	0.00488
GO:0061162	0.00488
GO:1901858	0.00491
GO:1904417	0.00491
GO:0060527	0.00491
GO:0071169	0.00491
GO:1905323	0.00491
GO:0051599	0.00491
GO:1902949	0.00491
GO:2000630	0.00491
GO:1903298	0.00491
GO:0035947	0.00491
GO:0010694	0.00491
GO:0072738	0.00491
GO:0036481	0.00491
GO:0001570	0.00496
GO:0051168	0.00496
GO:0003181	0.00499
GO:1901741	0.00499
GO:0007063	0.00499
GO:0036499	0.00499
GO:0006468	0.00508
GO:0048332	0.00509
GO:0061136	0.0051
GO:0032469	0.00512
GO:0032515	0.00514
GO:0036295	0.00515
GO:0070234	0.00515
GO:0044065	0.00515
GO:0001714	0.00515
GO:0051775	0.00515
GO:0007183	0.00515
GO:2000427	0.00515
GO:0045725	0.00515
GO:0048313	0.00515
GO:0007223	0.0052
GO:0030049	0.0052
GO:0071902	0.0052
GO:0016241	0.00533
GO:0006414	0.00533
GO:0014888	0.00534
GO:0007051	0.0054
GO:0045132	0.00542
GO:0022604	0.00543
GO:0021761	0.00543
GO:0009791	0.00543
GO:0010564	0.00544
GO:0070373	0.0055
GO:0048844	0.0055
GO:0050766	0.00551
GO:0014070	0.00552
GO:0002067	0.00553
GO:0050871	0.00553
GO:0075733	0.00553
GO:0006310	0.00555
GO:1903428	0.00555
GO:0001836	0.00559
GO:0010823	0.00562
GO:0002437	0.00564
GO:0051496	0.00564
GO:0032781	0.00564
GO:0072659	0.00564
GO:0007369	0.00564
GO:0060444	0.00565
GO:0021819	0.00565
GO:0006607	0.00565
GO:0034138	0.00565
GO:0030099	0.00565
GO:0061024	0.00571
GO:0007005	0.00573
GO:0070374	0.00579
GO:0060968	0.00587
GO:0032870	0.00592
GO:0007281	0.00601
GO:0009890	0.00606
GO:0001889	0.00613
GO:0016445	0.00613
GO:0030183	0.00617
GO:0060351	0.00622
GO:0060706	0.00622
GO:0040001	0.00622
GO:0010613	0.00622
GO:0030838	0.00625
GO:0007584	0.00628
GO:1901800	0.00635
GO:0000070	0.00651
GO:0061097	0.00651
GO:0060644	0.00653
GO:0034315	0.00653
GO:0031629	0.00653
GO:0001921	0.00653
GO:0045080	0.00653
GO:0007252	0.00653
GO:0032239	0.00653
GO:0032930	0.00653
GO:0055012	0.00653
GO:1903541	0.00653
GO:0033674	0.00654
GO:0043254	0.0066
GO:0008608	0.00666
GO:1904019	0.0067
GO:0009651	0.00671
GO:0051150	0.00671
GO:0051569	0.00671
GO:0071539	0.00671
GO:0010259	0.00671
GO:0036003	0.00671
GO:0045184	0.00677
GO:0071166	0.00679
GO:0007032	0.00683
GO:0000387	0.00701
GO:0043277	0.00706
GO:0033146	0.00707
GO:0006333	0.00707
GO:0031647	0.00711
GO:0044068	0.00713
GO:0021522	0.00713
GO:0061462	0.00713
GO:1990830	0.00718
GO:0030705	0.00723
GO:0022411	0.00729
GO:0051169	0.00733
GO:0048638	0.00735
GO:2001021	0.00737
GO:0031345	0.00738
GO:0016571	0.0074
GO:0034508	0.00741
GO:2000058	0.00742
GO:0032386	0.00743
GO:0045165	0.00746
GO:0007094	0.00747
GO:0060397	0.0075
GO:0090557	0.0075
GO:0075522	0.0075
GO:1901838	0.0075
GO:0060576	0.0075
GO:0051026	0.0075
GO:0045722	0.0075
GO:0048291	0.0075
GO:0048742	0.0075
GO:0033148	0.0075
GO:0046007	0.0075
GO:0033523	0.0075
GO:1903076	0.00756
GO:0001837	0.0076
GO:0005977	0.00761
GO:0009306	0.00761
GO:0008585	0.00761
GO:0032885	0.00771
GO:0060260	0.00771
GO:0010811	0.00773
GO:0045005	0.00776
GO:0006896	0.00776
GO:0034384	0.00776
GO:0045061	0.00776
GO:0071636	0.00776
GO:0055022	0.00776
GO:0043153	0.00776
GO:2000377	0.00782
GO:0006418	0.00785
GO:1903036	0.00785
GO:0090398	0.00785
GO:0043112	0.00789
GO:0051493	0.00792
GO:0000079	0.00794
GO:0045185	0.00796
GO:0051651	0.00796
GO:1900076	0.00796
GO:0006605	0.00797
GO:0031329	0.00798
GO:1902042	0.00798
GO:0071276	0.00798
GO:0071870	0.00798
GO:0050773	0.00803
GO:0033273	0.00806
GO:2000779	0.00808
GO:0030888	0.00808
GO:0036473	0.00812
GO:0010629	0.00812
GO:0071479	0.00815
GO:0014037	0.00816
GO:0046638	0.00816
GO:0006958	0.00816
GO:0007212	0.00816
GO:1902305	0.00819
GO:0051893	0.00819
GO:0007612	0.0082
GO:0010976	0.00823
GO:0010657	0.00824
GO:1901068	0.00827
GO:1901998	0.00828
GO:0032633	0.00828
GO:0042476	0.00833
GO:0060997	0.00835
GO:0071377	0.00837
GO:0043928	0.00842
GO:0046949	0.00842
GO:0031648	0.00842
GO:0045540	0.00842
GO:0000381	0.00842
GO:0036092	0.00842
GO:0055010	0.00843
GO:0045931	0.00851
GO:0032784	0.00867
GO:0042993	0.00869
GO:0016233	0.00873
GO:0032984	0.00877
GO:0008104	0.00881
GO:0003272	0.00883
GO:0060438	0.00883
GO:0060602	0.00883
GO:0006884	0.00883
GO:0006972	0.00883
GO:0032075	0.00883
GO:0002320	0.00883
GO:0010893	0.00883
GO:0010869	0.00883
GO:0000423	0.00883
GO:0060039	0.00883
GO:1901654	0.00896
GO:0050772	0.00901
GO:0030193	0.00901
GO:0043484	0.00903
GO:0048193	0.00905
GO:0051384	0.00915
GO:0051170	0.00933
GO:0034504	0.00936
GO:0045639	0.00955
GO:0031056	0.00955
GO:0043491	0.00956
GO:0051149	0.00957
GO:0048514	0.00962
GO:0032271	0.00964
GO:0060560	0.00968
GO:0060479	0.00974
GO:1904707	0.00974
GO:0051044	0.00974
GO:0007221	0.00974
GO:0032799	0.00974
GO:2000209	0.00974
GO:0033233	0.00974
GO:0045216	0.00992
GO:0071417	0.00993
GO:0016458	0.00995
GO:0033631	0.00999
GO:0050862	0.00999
GO:0031622	0.00999
GO:0061029	0.00999
GO:0071340	0.00999
GO:1900119	0.00999
GO:1900246	0.00999
GO:0030157	0.00999
GO:0072425	0.00999
GO:1903980	0.00999
GO:0046325	0.00999
GO:1904063	0.00999
GO:0051276	0.01019
GO:0050764	0.01025
GO:2001242	0.01026
GO:1903902	0.0103
GO:0061323	0.0103
GO:1904354	0.01034
GO:1904379	0.01034
GO:1904327	0.01034
GO:0006268	0.01034
GO:0034444	0.01034
GO:0034445	0.01034
GO:0006610	0.01034
GO:0006987	0.01034
GO:0006975	0.01034
GO:0031937	0.01034
GO:1902510	0.01034
GO:0051683	0.01034
GO:2000074	0.01034
GO:0030050	0.01034
GO:0045144	0.01034
GO:1903423	0.01034
GO:0085020	0.01034
GO:0072239	0.01034
GO:0033129	0.01034
GO:0052651	0.01034
GO:0090435	0.01034
GO:0075713	0.01034
GO:0046462	0.01034
GO:0035710	0.01037
GO:0034250	0.01039
GO:0016578	0.01049
GO:0061440	0.01049
GO:0061437	0.01049
GO:0035767	0.01049
GO:0045738	0.01049
GO:1903205	0.01049
GO:0016180	0.01049
GO:2001251	0.01057
GO:0010558	0.0107
GO:0051148	0.01073
GO:0043068	0.01075
GO:2000379	0.01084
GO:0051053	0.01087
GO:0071824	0.01095
GO:2001020	0.01099
GO:0048635	0.01101
GO:0007249	0.01104
GO:0022603	0.01105
GO:0043628	0.01111
GO:0007143	0.01111
GO:0002544	0.01111
GO:0045577	0.01111
GO:0048259	0.01115
GO:0032272	0.0112
GO:0046785	0.01129
GO:0035295	0.0113
GO:0051099	0.01131
GO:0070727	0.01134
GO:0097306	0.01143
GO:0048511	0.01149
GO:0031123	0.01151
GO:0051241	0.01159
GO:0031297	0.0116
GO:0006293	0.0116
GO:0006295	0.0116
GO:1900078	0.0116
GO:0030155	0.01173
GO:1904666	0.01178
GO:1901861	0.01179
GO:0002381	0.01182
[truncated: 1,005 more rows]

## Sheet: REVIGO_LOSSES
Supplementary Table vId: Enriched gene ontologies for proteins involved in egdetic losses after REVIGO pruning
Biological Processes
GO_term_ID	description	log10 p-value	uniqueness	dispensability
GO:0000122	negative regulation of transcription from RNA polymerase II promoter	-300	0.811	0
GO:0009952	anterior/posterior pattern specification	-3.8539	0.924	0
GO:0035635	entry of bacterium into host cell	-3.8239	0.977	0
GO:0045197	establishment or maintenance of epithelial cell apical/basal polarity	-3.7696	0.963	0.01
GO:0051098	regulation of binding	-3.4089	0.935	0.037
GO:0042752	regulation of circadian rhythm	-2.6126	0.963	0.04
GO:1900740	positive regulation of protein insertion into mitochondrial membrane involved in apoptotic signaling pathway	-3.9586	0.685	0.042
GO:0051409	response to nitrosative stress	-2.6655	0.945	0.052
GO:0010165	response to X-ray	-3.8539	0.952	0.057
GO:0043687	post-translational protein modification	-3.2076	0.92	0.089
GO:0043954	cellular component maintenance	-3.3768	0.932	0.104
GO:0097242	beta-amyloid clearance	-3.0315	0.958	0.111
GO:2000049	positive regulation of cell-cell adhesion mediated by cadherin	-3.3565	0.924	0.114
GO:0007179	transforming growth factor beta receptor signaling pathway	-3.8861	0.843	0.132
GO:0010971	positive regulation of G2/M transition of mitotic cell cycle	-3.9208	0.869	0.141
GO:0038061	NIK/NF-kappaB signaling	-3.8239	0.898	0.152
GO:0022417	protein maturation by protein folding	-3.4685	0.928	0.154
GO:0030522	intracellular receptor signaling pathway	-2.7496	0.902	0.165
GO:0055013	cardiac muscle cell development	-3.5686	0.879	0.174
GO:0042733	embryonic digit morphogenesis	-3.5376	0.913	0.175
GO:0032471	negative regulation of endoplasmic reticulum calcium ion concentration	-3.4685	0.945	0.18
GO:0000244	spliceosomal tri-snRNP complex assembly	-3.9208	0.853	0.184
GO:0046688	response to copper ion	-2.6308	0.936	0.197
GO:0008284	positive regulation of cell proliferation	-3.9208	0.87	0.197
GO:0070842	aggresome assembly	-3.0809	0.936	0.203
GO:0010501	RNA secondary structure unwinding	-3.6383	0.934	0.211
GO:0045667	regulation of osteoblast differentiation	-3.3188	0.881	0.219
GO:0032436	positive regulation of proteasomal ubiquitin-dependent protein catabolic process	-3.7959	0.798	0.22
GO:0010508	positive regulation of autophagy	-3.3565	0.904	0.225
GO:0097421	liver regeneration	-3.5376	0.927	0.227
GO:0007030	Golgi organization	-2.9872	0.915	0.229
GO:0090647	modulation of age-related behavioral decline	-3.7212	0.912	0.229
GO:0070828	heterochromatin organization	-2.8827	0.904	0.232
GO:0000731	DNA synthesis involved in DNA repair	-3.7696	0.825	0.239
GO:1904874	positive regulation of telomerase RNA localization to Cajal body	-3.3979	0.892	0.247
GO:0009303	rRNA transcription	-3.3279	0.926	0.25
GO:0032786	positive regulation of DNA-templated transcription, elongation	-3.0809	0.849	0.254
GO:0043312	neutrophil degranulation	-3.7447	0.866	0.257
GO:0006359	regulation of transcription from RNA polymerase III promoter	-2.6308	0.894	0.258
GO:0042493	response to drug	-3.6576	0.926	0.26
GO:0034329	cell junction assembly	-3.5086	0.894	0.266
GO:0006383	transcription from RNA polymerase III promoter	-2.6882	0.925	0.267
GO:0043537	negative regulation of blood vessel endothelial cell migration	-3.1938	0.848	0.274
GO:0032770	positive regulation of monooxygenase activity	-3.1135	0.872	0.277
GO:0006403	RNA localization	-3.3565	0.951	0.278
GO:0009611	response to wounding	-3.3188	0.923	0.278
GO:0032743	positive regulation of interleukin-2 production	-3.1805	0.88	0.279
GO:0034380	high-density lipoprotein particle assembly	-2.6383	0.864	0.282
GO:1900453	negative regulation of long term synaptic depression	-3.4685	0.864	0.283
GO:0032463	negative regulation of protein homooligomerization	-3.8539	0.84	0.285
GO:1905344	prostaglandin catabolic process	-2.6946	0.933	0.286
GO:0048546	digestive tract morphogenesis	-2.821	0.92	0.296
GO:0043392	negative regulation of DNA binding	-3.4437	0.929	0.297
GO:0097284	hepatocyte apoptotic process	-3.3565	0.946	0.298
GO:0043666	regulation of phosphoprotein phosphatase activity	-3.1871	0.846	0.298
GO:0008593	regulation of Notch signaling pathway	-3.2757	0.886	0.306
GO:0035690	cellular response to drug	-3.4949	0.916	0.307
GO:0060561	apoptotic process involved in morphogenesis	-3.7696	0.9	0.312
GO:0030307	positive regulation of cell growth	-3.7959	0.828	0.315
GO:0006396	RNA processing	-3.0362	0.909	0.316
GO:2000334	positive regulation of blood microparticle formation	-3.0809	0.836	0.323
GO:0006986	response to unfolded protein	-3.6576	0.895	0.326
GO:0070601	centromeric sister chromatid cohesion	-3.0132	0.87	0.33
GO:0051096	positive regulation of helicase activity	-2.6946	0.943	0.332
GO:0043124	negative regulation of I-kappaB kinase/NF-kappaB signaling	-3.3872	0.846	0.334
GO:0007596	blood coagulation	-3.1135	0.85	0.336
GO:0072132	mesenchyme morphogenesis	-3.0044	0.907	0.342
GO:0019886	antigen processing and presentation of exogenous peptide antigen via MHC class II	-3.1871	0.968	0.342
GO:0010803	regulation of tumor necrosis factor-mediated signaling pathway	-3.6778	0.852	0.342
GO:0097194	execution phase of apoptosis	-2.8356	0.938	0.343
GO:0031532	actin cytoskeleton reorganization	-3.6021	0.891	0.347
GO:0060544	regulation of necroptotic process	-3.4685	0.92	0.348
GO:0060546	negative regulation of necroptotic process	-3.0132	0.892	0.902
GO:0030111	regulation of Wnt signaling pathway	-3.7959	0.862	0.359
GO:0007265	Ras protein signal transduction	-2.9136	0.888	0.361
GO:0006417	regulation of translation	-3.4815	0.817	0.369
GO:0051090	regulation of sequence-specific DNA binding transcription factor activity	-3.2757	0.847	0.371
GO:1901533	negative regulation of hematopoietic progenitor cell differentiation	-2.6946	0.843	0.375
GO:0048469	cell maturation	-3.5376	0.911	0.377
GO:0050847	progesterone receptor signaling pathway	-3.0809	0.878	0.378
GO:2000378	negative regulation of reactive oxygen species metabolic process	-3.4559	0.883	0.382
GO:0010628	positive regulation of gene expression	-2.9355	0.819	0.388
GO:0021782	glial cell development	-3.2924	0.904	0.39
GO:0030900	forebrain development	-3.1739	0.908	0.39
GO:0034097	response to cytokine	-2.6576	0.906	0.392
GO:0050775	positive regulation of dendrite morphogenesis	-3.0555	0.779	0.394
GO:0034614	cellular response to reactive oxygen species	-3.5528	0.86	0.395
GO:1902895	positive regulation of pri-miRNA transcription from RNA polymerase II promoter	-2.8182	0.853	0.397
GO:0007283	spermatogenesis	-3.7959	0.925	0.399
GO:0007100	mitotic centrosome separation	-3.1871	0.871	0.4
GO:0070897	DNA-templated transcriptional preinitiation complex assembly	-3.0132	0.846	0.4
GO:1904646	cellular response to beta-amyloid	-3.1135	0.909	0.404
GO:0043923	positive regulation by host of viral transcription	-3.4949	0.842	0.408
GO:0043524	negative regulation of neuron apoptotic process	-3.1427	0.87	0.41
GO:0032071	regulation of endodeoxyribonuclease activity	-3.0809	0.857	0.413
GO:0048208	COPII vesicle coating	-3.7212	0.819	0.419
GO:0071316	cellular response to nicotine	-3.0757	0.906	0.42
GO:0071459	protein localization to chromosome, centromeric region	-2.8182	0.939	0.421
GO:0002064	epithelial cell development	-2.7033	0.899	0.427
GO:0000281	mitotic cytokinesis	-3.4318	0.928	0.431
GO:0071260	cellular response to mechanical stimulus	-3.1079	0.933	0.432
GO:0031623	receptor internalization	-3.6021	0.892	0.434
GO:0045454	cell redox homeostasis	-2.9393	0.929	0.435
GO:2000587	negative regulation of platelet-derived growth factor receptor-beta signaling pathway	-3.0809	0.864	0.439
GO:0002224	toll-like receptor signaling pathway	-3.1675	0.806	0.445
GO:0035162	embryonic hemopoiesis	-2.6383	0.896	0.445
GO:2000178	negative regulation of neural precursor cell proliferation	-2.9101	0.913	0.446
GO:0038111	interleukin-7-mediated signaling pathway	-2.8182	0.894	0.446
GO:0006309	apoptotic DNA fragmentation	-3.6198	0.815	0.447
GO:0000187	activation of MAPK activity	-3.7696	0.712	0.449
GO:0031098	stress-activated protein kinase signaling cascade	-2.8928	0.857	0.45
GO:0032495	response to muramyl dipeptide	-2.8827	0.914	0.451
GO:0032088	negative regulation of NF-kappaB transcription factor activity	-3.2757	0.84	0.454
GO:0000732	strand displacement	-2.6799	0.908	0.454
GO:0018108	peptidyl-tyrosine phosphorylation	-2.7959	0.877	0.46
GO:0045471	response to ethanol	-3.2218	0.911	0.463
GO:0071376	cellular response to corticotropin-releasing hormone stimulus	-2.6946	0.903	0.467
GO:0006678	glucosylceramide metabolic process	-2.6946	0.914	0.469
GO:0031396	regulation of protein ubiquitination	-3.0915	0.835	0.471
GO:1903322	positive regulation of protein modification by small protein conjugation or removal	-2.7799	0.795	0.934
GO:1904999	positive regulation of leukocyte adhesion to arterial endothelial cell	-2.6946	0.932	0.474
GO:0006978	DNA damage response, signal transduction by p53 class mediator resulting in transcription of p21 class mediator	-3.0315	0.878	0.478
GO:0001824	blastocyst development	-2.9872	0.92	0.485
GO:0070972	protein localization to endoplasmic reticulum	-2.58	0.933	0.492
GO:0071392	cellular response to estradiol stimulus	-3.5376	0.892	0.498
GO:0010799	regulation of peptidyl-threonine phosphorylation	-2.6716	0.848	0.499
GO:0071360	cellular response to exogenous dsRNA	-3.0315	0.906	0.501
GO:0045787	positive regulation of cell cycle	-2.8697	0.848	0.501
GO:0031058	positive regulation of histone modification	-3.7696	0.727	0.502
GO:0008356	asymmetric cell division	-2.585	0.97	0.507
GO:0042994	cytoplasmic sequestering of transcription factor	-3.9208	0.837	0.507
GO:0051259	protein oligomerization	-2.9469	0.88	0.507
GO:0071803	positive regulation of podosome assembly	-3.7212	0.819	0.507
GO:0006879	cellular iron ion homeostasis	-2.5952	0.938	0.51
GO:2000002	negative regulation of DNA damage checkpoint	-3.8539	0.788	0.513
GO:1904290	negative regulation of mitotic DNA damage checkpoint	-2.6946	0.748	1.111
GO:0006370	7-methylguanosine mRNA capping	-2.6925	0.924	0.514
GO:1990416	cellular response to brain-derived neurotrophic factor stimulus	-2.6655	0.915	0.515
GO:0048661	positive regulation of smooth muscle cell proliferation	-2.6073	0.894	0.519
GO:0000460	maturation of 5.8S rRNA	-2.821	0.87	0.521
GO:0032653	regulation of interleukin-10 production	-2.6038	0.915	0.528
GO:0090281	negative regulation of calcium ion import	-2.6655	0.894	0.53
GO:1901655	cellular response to ketone	-2.7825	0.899	0.538
GO:0010942	positive regulation of cell death	-2.7305	0.846	0.543
GO:0021955	central nervous system neuron axonogenesis	-2.5901	0.867	0.545
GO:0048010	vascular endothelial growth factor receptor signaling pathway	-3.7696	0.891	0.549
GO:0051987	positive regulation of attachment of spindle microtubules to kinetochore	-2.6946	0.882	0.549
GO:0034116	positive regulation of heterotypic cell-cell adhesion	-3.1871	0.921	0.552
GO:0032727	positive regulation of interferon-alpha production	-2.8182	0.884	0.558
GO:0030866	cortical actin cytoskeleton organization	-3.2441	0.9	0.56
GO:0007130	synaptonemal complex assembly	-2.8182	0.843	0.562
GO:0031663	lipopolysaccharide-mediated signaling pathway	-3.4815	0.849	0.563
GO:0065003	macromolecular complex assembly	-2.8894	0.875	0.565
GO:0000729	DNA double-strand break processing	-2.556	0.847	0.565
GO:0035987	endodermal cell differentiation	-3.2441	0.892	0.569
GO:0033598	mammary gland epithelial cell proliferation	-2.9281	0.906	0.569
GO:1905050	positive regulation of metallopeptidase activity	-2.6946	0.835	0.57
GO:0006260	DNA replication	-3.7447	0.887	0.57
GO:0000492	box C/D snoRNP assembly	-3.0809	0.905	0.573
GO:0070936	protein K48-linked ubiquitination	-2.7773	0.916	0.577
GO:0035265	organ growth	-2.6271	0.931	0.58
GO:0032410	negative regulation of transporter activity	-3.0862	0.855	0.582
GO:0009615	response to virus	-3.0915	0.951	0.583
GO:0006110	regulation of glycolytic process	-3.3279	0.832	0.583
GO:0070507	regulation of microtubule cytoskeleton organization	-2.9914	0.839	0.584
GO:0008584	male gonad development	-3.5229	0.908	0.584
GO:0046784	viral mRNA export from host cell nucleus	-2.7545	0.888	0.587
GO:1903827	regulation of cellular protein localization	-3.2076	0.882	0.587
GO:0070734	histone H3-K27 methylation	-3.3565	0.842	0.589
GO:0034612	response to tumor necrosis factor	-2.6421	0.909	0.59
GO:2000008	regulation of protein localization to cell surface	-2.6925	0.904	0.593
GO:0030449	regulation of complement activation	-2.7721	0.769	0.596
GO:0006275	regulation of DNA replication	-3.301	0.847	0.597
GO:0031497	chromatin assembly	-3.5229	0.835	0.598
GO:0036297	interstrand cross-link repair	-3.0223	0.838	0.602
GO:0043624	cellular protein complex disassembly	-2.9666	0.875	0.602
GO:1904871	positive regulation of protein localization to Cajal body	-3.0809	0.875	0.605
GO:0031333	negative regulation of protein complex assembly	-3.4685	0.809	0.608
GO:0097191	extrinsic apoptotic signaling pathway	-3.585	0.85	0.609
GO:0003281	ventricular septum development	-3.2676	0.909	0.609
GO:0007173	epidermal growth factor receptor signaling pathway	-3.1427	0.889	0.61
GO:0043552	positive regulation of phosphatidylinositol 3-kinase activity	-2.8697	0.817	0.614
GO:0006458	'de novo' protein folding	-2.7167	0.985	0.614
GO:0000278	mitotic cell cycle	-3.1739	0.918	0.614
GO:0001829	trophectodermal cell differentiation	-2.8827	0.906	0.616
GO:0045653	negative regulation of megakaryocyte differentiation	-2.6655	0.845	0.618
GO:0031573	intra-S DNA damage checkpoint	-3.1871	0.818	0.618
GO:0032729	positive regulation of interferon-gamma production	-2.6021	0.873	0.618
GO:0006296	nucleotide-excision repair, DNA incision, 5'-to lesion	-3.5686	0.839	0.618
GO:0003151	outflow tract morphogenesis	-3.1192	0.898	0.618
GO:0043011	myeloid dendritic cell differentiation	-3.3279	0.89	0.621
GO:0001568	blood vessel development	-2.8416	0.904	0.622
GO:0030100	regulation of endocytosis	-3.2291	0.838	0.624
GO:0051321	meiotic cell cycle	-2.7959	0.915	0.626
GO:0008286	insulin receptor signaling pathway	-3.0044	0.831	0.628
GO:0006998	nuclear envelope organization	-2.7905	0.895	0.628
GO:0006122	mitochondrial electron transport, ubiquinol to cytochrome c	-2.5817	0.893	0.629
GO:0030324	lung development	-2.6556	0.914	0.63
GO:0061048	negative regulation of branching involved in lung morphogenesis	-2.6946	0.872	0.632
GO:0007080	mitotic metaphase plate congression	-2.857	0.816	0.635
GO:0045830	positive regulation of isotype switching	-2.6383	0.713	0.637
GO:0016255	attachment of GPI anchor to protein	-2.6946	0.891	0.638
GO:0034975	protein folding in endoplasmic reticulum	-2.5817	0.985	0.638
GO:0032927	positive regulation of activin receptor signaling pathway	-3.0757	0.859	0.638
GO:0060213	positive regulation of nuclear-transcribed mRNA poly(A) tail shortening	-3.0132	0.836	0.638
GO:1902275	regulation of chromatin organization	-2.7167	0.84	0.639
GO:0010970	transport along microtubule	-2.6596	0.894	0.641
GO:1902186	regulation of viral release from host cell	-3.2007	0.939	0.643
GO:0009411	response to UV	-3.7696	0.948	0.647
GO:1904353	regulation of telomere capping	-2.6799	0.775	0.649
GO:0046827	positive regulation of protein export from nucleus	-3.1871	0.862	0.649
GO:0071230	cellular response to amino acid stimulus	-2.9469	0.886	0.651
GO:0030952	establishment or maintenance of cytoskeleton polarity	-3.0809	0.906	0.653
GO:0060765	regulation of androgen receptor signaling pathway	-3.0809	0.845	0.655
GO:0060965	negative regulation of gene silencing by miRNA	-3.4949	0.787	0.657
GO:0032200	telomere organization	-3.1024	0.898	0.663
GO:0035051	cardiocyte differentiation	-2.618	0.89	0.664
GO:0097296	activation of cysteine-type endopeptidase activity involved in apoptotic signaling pathway	-3.7212	0.756	0.665
GO:0050680	negative regulation of epithelial cell proliferation	-2.6757	0.897	0.667
GO:0045944	positive regulation of transcription from RNA polymerase II promoter	-300	0.79	0.667
GO:0033044	regulation of chromosome organization	-3.0605	0.845	0.668
GO:0016575	histone deacetylation	-3.7447	0.833	0.673
GO:0051304	chromosome separation	-2.6615	0.925	0.673
GO:0032970	regulation of actin filament-based process	-2.5935	0.934	0.675
GO:2000104	negative regulation of DNA-dependent DNA replication	-3.3279	0.832	0.676
GO:0000245	spliceosomal complex assembly	-3.5086	0.836	0.678
GO:0009950	dorsal/ventral axis specification	-3.1871	0.938	0.678
GO:1902043	positive regulation of extrinsic apoptotic signaling pathway via death domain receptors	-3.7212	0.825	0.679
GO:0032872	regulation of stress-activated MAPK cascade	-3.6383	0.726	0.679
GO:0007254	JNK cascade	-2.5867	0.782	0.933
GO:2000144	positive regulation of DNA-templated transcription, initiation	-2.7471	0.768	0.68
GO:0031146	SCF-dependent proteasomal ubiquitin-dependent protein catabolic process	-3.1135	0.901	0.685
GO:0006886	intracellular protein transport	-2.9172	0.923	0.685
GO:0048255	mRNA stabilization	-3.0088	0.891	0.685
GO:1903960	negative regulation of anion transmembrane transport	-2.6655	0.899	0.685
GO:0042692	muscle cell differentiation	-2.8761	0.907	0.687
GO:0090085	regulation of protein deubiquitination	-3.0132	0.866	0.688
GO:0002573	myeloid leukocyte differentiation	-2.8539	0.874	0.688
GO:0030433	ER-associated ubiquitin-dependent protein catabolic process	-3.6383	0.783	0.692
GO:0006900	membrane budding	-2.644	0.889	0.692
GO:0031109	microtubule polymerization or depolymerization	-2.6289	0.887	0.696
GO:0031330	negative regulation of cellular catabolic process	-2.8633	0.851	0.697
GO:0042177	negative regulation of protein catabolic process	-2.8097	0.816	0.902
GO:0008285	negative regulation of cell proliferation	-3.5686	0.883	0.698
GO:0033077	T cell differentiation in thymus	-2.8447	0.875	0.699
GO:0000028	ribosomal small subunit assembly	-2.7423	0.886	0.702
GO:0043154	negative regulation of cysteine-type endopeptidase activity involved in apoptotic process	-3.2757	0.766	0.704
GO:0050869	negative regulation of B cell activation	-2.5901	0.886	0.705
GO:0060251	regulation of glial cell proliferation	-2.9957	0.872	0.706
GO:0031581	hemidesmosome assembly	-3.0132	0.914	0.708
GO:1903376	regulation of oxidative stress-induced neuron intrinsic apoptotic signaling pathway	-3.0809	0.814	0.709
GO:0001934	positive regulation of protein phosphorylation	-3.5086	0.759	0.715
GO:0018027	peptidyl-lysine dimethylation	-3.1871	0.909	0.716
GO:0071901	negative regulation of protein serine/threonine kinase activity	-3.6383	0.781	0.719
GO:0042921	glucocorticoid receptor signaling pathway	-2.8827	0.867	0.719
GO:0002506	polysaccharide assembly with MHC class II protein complex	-3.0809	0.897	0.719
GO:0001892	embryonic placenta development	-2.6038	0.894	0.72
GO:0006282	regulation of DNA repair	-3.0915	0.772	0.723
GO:0036462	TRAIL-activated apoptotic signaling pathway	-2.6946	0.883	0.725
GO:0046600	negative regulation of centriole replication	-3.0809	0.799	0.725
GO:2000810	regulation of bicellular tight junction assembly	-3.6383	0.874	0.726
GO:0042254	ribosome biogenesis	-2.9586	0.907	0.728
GO:0007093	mitotic cell cycle checkpoint	-2.6576	0.857	0.731
GO:0051028	mRNA transport	-2.7721	0.944	0.733
GO:1903146	regulation of mitophagy	-3.2757	0.849	0.734
GO:2001267	regulation of cysteine-type endopeptidase activity involved in apoptotic signaling pathway	-2.6696	0.785	0.734
GO:0035280	miRNA loading onto RISC involved in gene silencing by miRNA	-2.6946	0.767	0.739
GO:0016239	positive regulation of macroautophagy	-2.6091	0.908	0.742
GO:2001234	negative regulation of apoptotic signaling pathway	-2.5784	0.799	0.743
GO:0016570	histone modification	-2.8013	0.81	0.744
GO:0007084	mitotic nuclear envelope reassembly	-2.6655	0.88	0.744
GO:0051973	positive regulation of telomerase activity	-3.1549	0.793	0.744
GO:0048588	developmental cell growth	-3.3872	0.904	0.749
GO:1900182	positive regulation of protein localization to nucleus	-3.3468	0.846	0.751
GO:0000165	MAPK cascade	-2.8861	0.784	0.753
GO:0001890	placenta development	-2.6198	0.907	0.754
GO:0060045	positive regulation of cardiac muscle cell proliferation	-2.556	0.813	0.759
GO:0043409	negative regulation of MAPK cascade	-3.301	0.729	0.76
GO:0042981	regulation of apoptotic process	-2.8729	0.888	0.761
GO:0051532	regulation of NFAT protein import into nucleus	-2.8827	0.889	0.764
GO:0043243	positive regulation of protein complex disassembly	-2.9031	0.827	0.765
GO:0061041	regulation of wound healing	-2.6517	0.88	0.765
GO:0007519	skeletal muscle tissue development	-2.6716	0.901	0.768
GO:0033127	regulation of histone phosphorylation	-2.7545	0.785	0.769
GO:0034644	cellular response to UV	-3.6383	0.934	0.77
GO:0035278	miRNA mediated inhibition of translation	-2.7545	0.819	0.771
GO:0019048	modulation by virus of host morphology or physiology	-3.1938	0.938	0.774
GO:0030511	positive regulation of transforming growth factor beta receptor signaling pathway	-2.7423	0.814	0.774
GO:0001756	somitogenesis	-2.5952	0.898	0.775
GO:0000717	nucleotide-excision repair, DNA duplex unwinding	-3.1805	0.783	0.776
GO:0043401	steroid hormone mediated signaling pathway	-2.5452	0.843	0.778
GO:0071398	cellular response to fatty acid	-2.6108	0.89	0.778
GO:0038083	peptidyl-tyrosine autophosphorylation	-2.9586	0.896	0.779
GO:0035067	negative regulation of histone acetylation	-3.1871	0.754	0.782
GO:0010634	positive regulation of epithelial cell migration	-2.6345	0.822	0.783
GO:0010332	response to gamma radiation	-3.2676	0.95	0.785
GO:0050995	negative regulation of lipid catabolic process	-2.6799	0.856	0.788
GO:0045934	negative regulation of nucleobase-containing compound metabolic process	-3.6021	0.813	0.788
GO:0032147	activation of protein kinase activity	-2.5719	0.765	0.79
GO:0001649	osteoblast differentiation	-2.8633	0.912	0.79
GO:0007004	telomere maintenance via telomerase	-2.5686	0.801	0.792
GO:0051054	positive regulation of DNA metabolic process	-2.7645	0.793	0.793
GO:0042346	positive regulation of NF-kappaB import into nucleus	-3.1938	0.783	0.794
GO:0060338	regulation of type I interferon-mediated signaling pathway	-3.4318	0.817	0.798
GO:0071816	tail-anchored membrane protein insertion into ER membrane	-3.8539	0.874	0.798
GO:0071345	cellular response to cytokine stimulus	-2.6253	0.882	0.801
GO:0071695	anatomical structure maturation	-2.7399	0.943	0.801
GO:2000678	negative regulation of transcription regulatory region DNA binding	-3.3279	0.932	0.801
GO:0035666	TRIF-dependent toll-like receptor signaling pathway	-2.8697	0.829	0.803
GO:0060766	negative regulation of androgen receptor signaling pathway	-3.3565	0.822	0.806
GO:0045732	positive regulation of protein catabolic process	-2.5817	0.797	0.806
GO:0048333	mesodermal cell differentiation	-2.9318	0.891	0.808
GO:0035116	embryonic hindlimb morphogenesis	-2.6799	0.918	0.811
GO:0045739	positive regulation of DNA repair	-3.2441	0.746	0.812
GO:2001200	positive regulation of dendritic cell differentiation	-2.6655	0.838	0.813
GO:2001171	positive regulation of ATP biosynthetic process	-3.0809	0.83	0.815
GO:0070423	nucleotide-binding oligomerization domain containing signaling pathway	-3.0915	0.812	0.819
GO:1903078	positive regulation of protein localization to plasma membrane	-3.4089	0.784	0.819
GO:0030261	chromosome condensation	-2.6308	0.904	0.822
GO:0060998	regulation of dendritic spine development	-2.9469	0.817	0.823
GO:0010972	negative regulation of G2/M transition of mitotic cell cycle	-3.7696	0.862	0.825
GO:0035405	histone-threonine phosphorylation	-2.6946	0.842	0.825
GO:0070198	protein localization to chromosome, telomeric region	-2.7447	0.938	0.827
GO:0034968	histone lysine methylation	-2.8386	0.819	0.83
GO:0051298	centrosome duplication	-2.8327	0.859	0.831
GO:0007098	centrosome cycle	-3.1192	0.857	0.907
GO:1903862	positive regulation of oxidative phosphorylation	-2.6946	0.828	0.833
GO:0048738	cardiac muscle tissue development	-2.6326	0.891	0.833
GO:0070301	cellular response to hydrogen peroxide	-3.1135	0.864	0.844
GO:0050434	positive regulation of viral transcription	-2.6882	0.832	0.849
GO:0006336	DNA replication-independent nucleosome assembly	-3.0177	0.844	0.85
GO:0034080	CENP-A containing nucleosome assembly	-3.2924	0.848	0.97
GO:0070932	histone H3 deacetylation	-3.6198	0.85	0.855
GO:0032091	negative regulation of protein binding	-2.9914	0.927	0.856
GO:0046826	negative regulation of protein export from nucleus	-2.6946	0.872	0.859
GO:0017148	negative regulation of translation	-3.2757	0.791	0.868
GO:0051567	histone H3-K9 methylation	-2.821	0.835	0.872
GO:0051573	negative regulation of histone H3-K9 methylation	-3.0132	0.755	0.875
GO:0045198	establishment of epithelial cell apical/basal polarity	-2.7545	0.908	0.876
GO:0032968	positive regulation of transcription elongation from RNA polymerase II promoter	-3.0757	0.853	0.878
GO:0060412	ventricular septum morphogenesis	-2.9666	0.902	0.878
GO:0036498	IRE1-mediated unfolded protein response	-3.8539	0.844	0.878
GO:0032206	positive regulation of telomere maintenance	-2.567	0.725	0.879
GO:2000679	positive regulation of transcription regulatory region DNA binding	-2.9101	0.934	0.881
GO:0042542	response to hydrogen peroxide	-2.8996	0.89	0.881
GO:0042992	negative regulation of transcription factor import into nucleus	-2.7496	0.846	0.882
GO:0030970	retrograde protein transport, ER to cytosol	-2.6308	0.767	0.884
GO:0035066	positive regulation of histone acetylation	-2.8697	0.743	0.891
GO:0031397	negative regulation of protein ubiquitination	-3.0223	0.805	0.894
GO:0051444	negative regulation of ubiquitin-protein transferase activity	-3.0915	0.791	0.931
Molecular Functions
GO_term_ID	description	log10 p-value	uniqueness	dispensability
GO:0000988	transcription factor activity, protein binding	-1.5733	0.994	0
GO:0001104	RNA polymerase II transcription cofactor activity	-3.3188	0.961	0
GO:0001227	transcriptional repressor activity, RNA polymerase II transcription regulatory region sequence-specific binding	-3.9586	0.973	0
GO:0003756	protein disulfide isomerase activity	-3.7959	0.937	0
GO:0008565	protein transporter activity	-1.9876	0.987	0
GO:0031625	ubiquitin protein ligase binding	-300	0.915	0
GO:0045182	translation regulator activity	-2.0655	0.994	0
GO:0050785	advanced glycation end-product receptor activity	-2.6861	0.96	0
GO:0097027	ubiquitin-protein transferase activator activity	-3.0706	0.952	0
GO:0051536	iron-sulfur cluster binding	-2.0969	0.988	0.006
GO:0042277	peptide binding	-1.8758	0.97	0.007
GO:0033218	amide binding	-2.0482	0.988	0.007
GO:0005525	GTP binding	-3.8539	0.924	0.007
GO:0005515	protein binding	-300	0.987	0.013
GO:0044877	macromolecular complex binding	-1.3377	0.987	0.019
GO:1990763	arrestin family protein binding	-1.3234	0.976	0.025
GO:0038132	neuregulin binding	-1.9183	0.965	0.027
GO:0097371	MDM2/MDM4 family protein binding	-1.3234	0.975	0.027
GO:0043008	ATP-dependent protein binding	-3.0605	0.974	0.028
GO:0043560	insulin receptor substrate binding	-1.712	0.974	0.029
GO:0045294	alpha-catenin binding	-2.6556	0.974	0.029
GO:0045295	gamma-catenin binding	-1.4429	0.974	0.029
GO:0070411	I-SMAD binding	-3.3468	0.97	0.029
GO:0001846	opsonin binding	-1.6022	0.974	0.029
GO:0051787	misfolded protein binding	-3.4815	0.974	0.029
GO:0032794	GTPase activating protein binding	-1.6467	0.973	0.03
GO:0097602	cullin family protein binding	-1.5715	0.973	0.03
GO:0034185	apolipoprotein binding	-2.0414	0.973	0.03
GO:0050780	dopamine receptor binding	-3.699	0.922	0.03
GO:0070577	lysine-acetylated histone binding	-2.5406	0.973	0.03
GO:0001223	transcription coactivator binding	-3.7959	0.932	0.03
GO:0001848	complement binding	-2.158	0.973	0.03
GO:0070064	proline-rich region binding	-3.0132	0.973	0.031
GO:0043236	laminin binding	-1.3372	0.972	0.032
GO:0043548	phosphatidylinositol 3-kinase binding	-1.7091	0.972	0.032
GO:0030544	Hsp70 protein binding	-2.9469	0.972	0.032
GO:0005484	SNAP receptor activity	-1.5372	0.972	0.033
GO:0051018	protein kinase A binding	-2.0985	0.972	0.033
GO:0031593	polyubiquitin binding	-3.4202	0.967	0.033
GO:0045309	protein phosphorylated amino acid binding	-2.6635	0.967	0.033
GO:0043621	protein self-association	-1.7706	0.971	0.034
GO:0005070	SH3/SH2 adaptor activity	-3.3565	0.962	0.034
GO:0046332	SMAD binding	-2.0773	0.971	0.035
GO:0051219	phosphoprotein binding	-3.4318	0.971	0.035
GO:0008013	beta-catenin binding	-3.7696	0.97	0.035
GO:0031072	heat shock protein binding	-3.7696	0.97	0.036
GO:0044325	ion channel binding	-1.4402	0.97	0.036
GO:0017124	SH3 domain binding	-3.5086	0.934	0.037
GO:0008017	microtubule binding	-3.2291	0.948	0.039
GO:0045296	cadherin binding	-300	0.964	0.041
GO:0008092	cytoskeletal protein binding	-2.821	0.965	0.047
GO:0042802	identical protein binding	-300	0.963	0.06
GO:0003857	3-hydroxyacyl-CoA dehydrogenase activity	-2.2765	0.927	0.097
GO:0008641	small protein activating enzyme activity	-2.6556	0.932	0.098
GO:0042054	histone methyltransferase activity	-3.4685	0.861	0.111
GO:0016279	protein-lysine N-methyltransferase activity	-1.8901	0.859	0.973
GO:0018024	histone-lysine N-methyltransferase activity	-1.7375	0.86	0.91
GO:0004004	ATP-dependent RNA helicase activity	-3.0757	0.906	0.123
GO:0008026	ATP-dependent helicase activity	-2.1457	0.903	0.954
GO:0035497	cAMP response element binding	-3.7212	0.92	0.127
GO:0005528	FK506 binding	-1.9905	0.952	0.129
GO:0016874	ligase activity	-1.5897	0.935	0.137
GO:0000287	magnesium ion binding	-3.4949	0.984	0.16
GO:0003730	mRNA 3'-UTR binding	-3.4815	0.909	0.173
GO:0097617	annealing activity	-1.712	0.94	0.173
GO:0003680	AT DNA binding	-3.3468	0.913	0.226
GO:0032356	oxidized DNA binding	-1.9776	0.927	0.226
GO:0003923	GPI-anchor transamidase activity	-1.9183	0.935	0.233
GO:0098599	palmitoyl hydrolase activity	-1.3503	0.935	0.233
GO:0000400	four-way junction DNA binding	-2.8697	0.921	0.235
GO:0016803	ether hydrolase activity	-1.517	0.933	0.241
GO:0008301	DNA binding, bending	-2.0975	0.926	0.241
GO:0016801	hydrolase activity, acting on ether bonds	-2.426	0.932	0.247
GO:0004535	poly(A)-specific ribonuclease activity	-2.2765	0.924	0.25
GO:0001056	RNA polymerase III activity	-2.8697	0.889	0.262
GO:0010485	H4 histone acetyltransferase activity	-1.8459	0.903	0.266
GO:0004407	histone deacetylase activity	-2.6696	0.916	0.274
GO:0032041	NAD-dependent histone deacetylase activity (H3-K14 specific)	-2.1152	0.922	0.969
GO:0017136	NAD-dependent histone deacetylase activity	-2.3036	0.92	0.919
GO:0003723	RNA binding	-300	0.91	0.277
GO:0005168	neurotrophin TRKA receptor binding	-2.3019	0.925	0.297
GO:0036459	thiol-dependent ubiquitinyl hydrolase activity	-2.6364	0.92	0.303
GO:0070883	pre-miRNA binding	-1.9183	0.93	0.308
GO:0050786	RAGE receptor binding	-1.4429	0.929	0.31
GO:0002162	dystroglycan binding	-1.517	0.965	0.313
GO:0030620	U2 snRNA binding	-1.6467	0.929	0.313
GO:0034513	box H/ACA snoRNA binding	-1.3234	0.929	0.313
GO:0005161	platelet-derived growth factor receptor binding	-2.5702	0.924	0.316
GO:0050750	low-density lipoprotein particle receptor binding	-1.7703	0.928	0.318
GO:1990247	N6-methyladenosine-containing RNA binding	-1.9776	0.927	0.321
GO:0035197	siRNA binding	-3.4559	0.927	0.324
GO:0070878	primary miRNA binding	-3.0706	0.927	0.324
GO:0015056	corticotrophin-releasing factor receptor activity	-1.5345	0.967	0.325
GO:0044388	small protein activating enzyme binding	-1.9183	0.937	0.328
GO:0005504	fatty acid binding	-2.158	0.971	0.33
GO:0005158	insulin receptor binding	-3.6021	0.893	0.334
GO:0005159	insulin-like growth factor receptor binding	-2.5702	0.928	0.334
GO:0004965	G-protein coupled GABA receptor activity	-1.517	0.967	0.335
GO:0017112	Rab guanyl-nucleotide exchange factor activity	-2.0615	0.959	0.338
GO:0070990	snRNP binding	-2.8697	0.957	0.339
GO:0035198	miRNA binding	-3.1612	0.924	0.34
GO:0019869	chloride channel inhibitor activity	-1.517	0.963	0.34
GO:0070325	lipoprotein particle receptor binding	-1.9401	0.926	0.341
GO:0005030	neurotrophin receptor activity	-1.5345	0.967	0.342
GO:0035255	ionotropic glutamate receptor binding	-2.158	0.926	0.343
GO:0070034	telomerase RNA binding	-1.7467	0.923	0.343
GO:0030235	nitric-oxide synthase regulator activity	-2.6861	0.959	0.345
GO:0046875	ephrin receptor binding	-3.5086	0.925	0.346
GO:0070717	poly-purine tract binding	-2.2336	0.917	0.346
GO:0031996	thioesterase binding	-2.1152	0.934	0.354
GO:0098505	G-rich strand telomeric DNA binding	-2.6556	0.917	0.356
GO:0004842	ubiquitin-protein transferase activity	-2.3458	0.876	0.358
GO:0050998	nitric-oxide synthase binding	-1.6467	0.933	0.359
GO:0043274	phospholipase binding	-1.3684	0.933	0.361
GO:0070182	DNA polymerase binding	-3.7212	0.933	0.361
GO:0017069	snRNA binding	-1.3439	0.919	0.365
GO:0032395	MHC class II receptor activity	-2.0706	0.965	0.366
GO:0070815	peptidyl-lysine 5-dioxygenase activity	-1.5345	0.934	0.374
GO:0051019	mitogen-activated protein kinase binding	-2.6635	0.926	0.377
GO:0003743	translation initiation factor activity	-3.3565	0.914	0.377
GO:0051721	protein phosphatase 2A binding	-2.8508	0.928	0.38
GO:0008327	methyl-CpG binding	-3.1739	0.904	0.38
GO:0051287	NAD binding	-3.1192	0.94	0.383
GO:0010385	double-stranded methylated DNA binding	-1.9183	0.92	0.384
GO:0030291	protein serine/threonine kinase inhibitor activity	-2.9872	0.947	0.384
GO:0008536	Ran GTPase binding	-3.2757	0.921	0.387
GO:0008474	palmitoyl-(protein) hydrolase activity	-1.3503	0.931	0.388
GO:0032135	DNA insertion or deletion binding	-2.3019	0.916	0.388
GO:0031491	nucleosome binding	-2.2984	0.959	0.389
GO:0031624	ubiquitin conjugating enzyme binding	-1.5255	0.929	0.39
GO:1902282	voltage-gated potassium channel activity involved in ventricular cardiac muscle cell action potential repolarization	-1.9776	0.988	0.392
GO:0034594	phosphatidylinositol trisphosphate phosphatase activity	-1.3234	0.931	0.393
GO:0008135	translation factor activity, RNA binding	-2.4001	0.913	0.396
GO:0043531	ADP binding	-3.0969	0.939	0.397
GO:0001013	RNA polymerase I regulatory region DNA binding	-1.8122	0.922	0.4
GO:0015379	potassium:chloride symporter activity	-1.6467	0.988	0.402
GO:0070063	RNA polymerase binding	-2.1972	0.927	0.402
GO:0019237	centromeric DNA binding	-1.3234	0.916	0.404
GO:0005487	nucleocytoplasmic transporter activity	-1.8022	0.988	0.405
GO:0008656	cysteine-type endopeptidase activator activity involved in apoptotic process	-2.1733	0.954	0.406
GO:0003696	satellite DNA binding	-1.6467	0.915	0.408
GO:0042162	telomeric DNA binding	-2.983	0.912	0.416
GO:0046934	phosphatidylinositol-4,5-bisphosphate 3-kinase activity	-2.7447	0.873	0.418
GO:0016303	1-phosphatidylinositol-3-kinase activity	-2.2798	0.877	0.939
GO:0010997	anaphase-promoting complex binding	-2.3019	0.946	0.421
GO:0032405	MutLalpha complex binding	-1.9183	0.943	0.421
GO:0032407	MutSalpha complex binding	-1.9183	0.943	0.953
GO:0043565	sequence-specific DNA binding	-2.8962	0.898	0.424
GO:0003707	steroid hormone receptor activity	-2.2457	0.961	0.426
GO:0032404	mismatch repair complex binding	-3.0706	0.945	0.43
GO:0070975	FHA domain binding	-3.0706	0.95	0.43
GO:0043028	cysteine-type endopeptidase regulator activity involved in apoptotic process	-2.1624	0.954	0.437
GO:0001156	TFIIIC-class transcription factor binding	-1.5345	0.941	0.437
GO:0002020	protease binding	-3.2518	0.922	0.441
GO:0060590	ATPase regulator activity	-1.7007	0.954	0.442
GO:0048185	activin binding	-1.3972	0.944	0.443
GO:0004385	guanylate kinase activity	-1.3972	0.89	0.445
GO:0070628	proteasome binding	-3.6021	0.943	0.445
GO:0016655	oxidoreductase activity, acting on NAD(P)H, quinone or similar compound as acceptor	-1.7706	0.921	0.449
GO:0001025	RNA polymerase III transcription factor binding	-1.5345	0.939	0.452
GO:0043426	MRF binding	-1.9183	0.939	0.452
GO:0051525	NFAT protein binding	-1.9183	0.939	0.452
GO:0050321	tau-protein kinase activity	-2.7423	0.886	0.457
GO:0019902	phosphatase binding	-2.2716	0.92	0.457
GO:0031683	G-protein beta/gamma-subunit complex binding	-2.3565	0.942	0.46
GO:0001094	TFIID-class transcription factor binding	-2.6556	0.93	0.463
GO:0004697	protein kinase C activity	-2.7282	0.882	0.467
GO:0035173	histone kinase activity	-2.6576	0.884	0.469
GO:0017162	aryl hydrocarbon receptor binding	-3.4559	0.899	0.471
GO:0019208	phosphatase regulator activity	-1.7328	0.952	0.473
GO:0030957	Tat protein binding	-1.712	0.937	0.474
GO:0035877	death effector domain binding	-1.5345	0.947	0.475
GO:0051425	PTB domain binding	-1.5345	0.947	0.475
GO:0051434	BH3 domain binding	-1.5345	0.947	0.475
GO:0071535	RING-like zinc finger domain binding	-1.5345	0.947	0.475
GO:0000995	transcription factor activity, core RNA polymerase III binding	-2.3019	0.968	0.477
GO:0004691	cAMP-dependent protein kinase activity	-2.3019	0.888	0.479
GO:0035184	histone threonine kinase activity	-2.6861	0.885	0.479
GO:0043422	protein kinase B binding	-1.712	0.929	0.483
GO:0017166	vinculin binding	-2.1152	0.96	0.484
GO:0001007	transcription factor activity, RNA polymerase III transcription factor binding	-1.3234	0.971	0.487
GO:0034236	protein kinase A catalytic subunit binding	-2.5702	0.924	0.488
GO:0070087	chromo shadow domain binding	-1.3234	0.945	0.49
GO:0008428	ribonuclease inhibitor activity	-1.5345	0.956	0.495
GO:0050700	CARD domain binding	-1.9905	0.944	0.501
GO:0051020	GTPase binding	-2.8239	0.914	0.501
GO:0044389	ubiquitin-like protein ligase binding	-1.6992	0.915	0.502
GO:0004712	protein serine/threonine/tyrosine kinase activity	-2.6326	0.877	0.504
GO:0000990	transcription factor activity, core RNA polymerase binding	-1.9194	0.97	0.507
GO:0015036	disulfide oxidoreductase activity	-1.7049	0.92	0.508
GO:0046966	thyroid hormone receptor binding	-3.7696	0.884	0.51
GO:0051400	BH domain binding	-1.9776	0.944	0.51
GO:0070016	armadillo repeat domain binding	-2.6556	0.944	0.51
GO:0016779	nucleotidyltransferase activity	-2.585	0.873	0.511
GO:0003677	DNA binding	-1.542	0.906	0.515
GO:0016667	oxidoreductase activity, acting on a sulfur group of donors	-1.3646	0.922	0.522
GO:0034713	type I transforming growth factor beta receptor binding	-1.8122	0.923	0.529
GO:0004865	protein serine/threonine phosphatase inhibitor activity	-2.2765	0.952	0.529
GO:0071837	HMG box domain binding	-1.3503	0.942	0.532
GO:0001221	transcription cofactor binding	-2.4535	0.932	0.533
GO:0004693	cyclin-dependent protein serine/threonine kinase activity	-2.6126	0.876	0.534
GO:0051059	NF-kappaB binding	-2.383	0.932	0.536
GO:0004675	transmembrane receptor protein serine/threonine kinase activity	-2.1733	0.86	0.537
GO:0031852	mu-type opioid receptor binding	-1.5345	0.928	0.541
GO:0030971	receptor tyrosine kinase binding	-2.0706	0.873	0.543
GO:0019199	transmembrane receptor protein kinase activity	-1.5064	0.852	0.549
GO:0019900	kinase binding	-2.4962	0.91	0.551
GO:0000983	transcription factor activity, RNA polymerase II core promoter sequence-specific	-1.9654	0.976	0.551
GO:0097718	disordered domain specific binding	-1.8798	0.94	0.558
GO:0042169	SH2 domain binding	-1.5308	0.94	0.561
GO:0031821	G-protein coupled serotonin receptor binding	-2.6861	0.926	0.561
GO:0000774	adenyl-nucleotide exchange factor activity	-1.517	0.91	0.562
GO:0017022	myosin binding	-1.3946	0.956	0.567
GO:0000977	RNA polymerase II regulatory region sequence-specific DNA binding	-3.1079	0.875	0.57
GO:0031748	D1 dopamine receptor binding	-1.3234	0.924	0.571
GO:0036402	proteasome-activating ATPase activity	-1.6467	0.925	0.58
GO:0048408	epidermal growth factor binding	-1.5345	0.965	0.587
GO:0042296	ISG15 transferase activity	-1.5345	0.91	0.588
GO:0003688	DNA replication origin binding	-1.6467	0.911	0.589
GO:0001882	nucleoside binding	-2.4449	0.917	0.589
GO:0003909	DNA ligase activity	-1.6467	0.931	0.59
GO:0003910	DNA ligase (ATP) activity	-1.3234	0.932	0.958
GO:0004879	RNA polymerase II transcription factor activity, ligand-activated sequence-specific DNA binding	-3.8239	0.945	0.592
GO:0038085	vascular endothelial growth factor binding	-1.5345	0.965	0.595
GO:0047144	2-acylglycerol-3-phosphate O-acyltransferase activity	-1.5715	0.908	0.596
GO:0099609	microtubule lateral binding	-1.5345	0.961	0.596
GO:0047025	3-oxoacyl-[acyl-carrier-protein] reductase (NADH) activity	-1.6467	0.933	0.597
GO:0019788	NEDD8 transferase activity	-2.3019	0.909	0.599
GO:0061665	SUMO ligase activity	-1.9183	0.909	0.599
GO:0031690	adrenergic receptor binding	-1.8022	0.921	0.599
GO:0017160	Ral GTPase binding	-1.334	0.926	0.599
GO:0016886	ligase activity, forming phosphoric ester bonds	-2.3143	0.932	0.6
GO:0032813	tumor necrosis factor receptor superfamily binding	-1.6866	0.914	0.609
GO:0004702	signal transducer, downstream of receptor, with serine/threonine kinase activity	-2.4134	0.848	0.615
GO:0030165	PDZ domain binding	-1.3261	0.935	0.617
GO:0016435	rRNA (guanine) methyltransferase activity	-2.6861	0.885	0.617
GO:0004090	carbonyl reductase (NADPH) activity	-1.5345	0.93	0.623
GO:0051015	actin filament binding	-2.0768	0.917	0.625
GO:0048407	platelet-derived growth factor binding	-1.4429	0.963	0.625
GO:0003705	transcription factor activity, RNA polymerase II distal enhancer sequence-specific binding	-3.301	0.974	0.634
GO:0005143	interleukin-12 receptor binding	-1.5345	0.922	0.635
GO:0005047	signal recognition particle binding	-1.9183	0.958	0.636
GO:0047035	testosterone dehydrogenase (NAD+) activity	-1.712	0.929	0.639
GO:0004525	ribonuclease III activity	-1.5345	0.929	0.64
GO:0032296	double-stranded RNA-specific ribonuclease activity	-1.5345	0.929	0.64
GO:0004713	protein tyrosine kinase activity	-2.2076	0.862	0.64
GO:0005123	death receptor binding	-1.6022	0.918	0.642
GO:0001078	transcriptional repressor activity, RNA polymerase II core promoter proximal region sequence-specific binding	-3.6198	0.974	0.649
GO:0097100	supercoiled DNA binding	-1.9183	0.927	0.65
GO:0098641	cadherin binding involved in cell-cell adhesion	-2.7282	0.965	0.652
GO:0001076	transcription factor activity, RNA polymerase II transcription factor binding	-2.9788	0.964	0.654
GO:0048365	Rac GTPase binding	-2.7423	0.919	0.659
GO:0004668	protein-arginine deiminase activity	-1.6467	0.928	0.67
GO:0004812	aminoacyl-tRNA ligase activity	-2.399	0.924	0.672
GO:1990825	sequence-specific mRNA binding	-1.517	0.921	0.673
GO:0009378	four-way junction helicase activity	-1.5345	0.921	0.682
GO:0035326	enhancer binding	-2.2967	0.908	0.682
GO:0051010	microtubule plus-end binding	-1.9905	0.957	0.682
GO:0030346	protein phosphatase 2B binding	-2.6861	0.934	0.692
GO:0008171	O-methyltransferase activity	-1.7467	0.878	0.697
GO:0001103	RNA polymerase II repressing transcription factor binding	-1.5191	0.93	0.701
GO:0035259	glucocorticoid receptor binding	-3.3872	0.92	0.704
GO:0001083	transcription factor activity, RNA polymerase II basal transcription factor binding	-1.3234	0.967	0.704
GO:0042809	vitamin D receptor binding	-3.3872	0.889	0.712
GO:0046965	retinoid X receptor binding	-3.7212	0.889	0.712
GO:0016538	cyclin-dependent protein serine/threonine kinase regulator activity	-1.5194	0.952	0.715
GO:0017002	activin-activated receptor activity	-1.6467	0.868	0.723
GO:0005154	epidermal growth factor receptor binding	-2.0937	0.92	0.723
GO:0048027	mRNA 5'-UTR binding	-2.8013	0.916	0.725
GO:0001158	enhancer sequence-specific DNA binding	-2.1805	0.894	0.727
GO:0000979	RNA polymerase II core promoter sequence-specific DNA binding	-2.3206	0.895	0.731
GO:0005527	macrolide binding	-1.9905	0.952	0.732
GO:0001228	transcriptional activator activity, RNA polymerase II transcription regulatory region sequence-specific binding	-3.6021	0.972	0.733
GO:0003755	peptidyl-prolyl cis-trans isomerase activity	-1.702	0.934	0.733
GO:0010484	H3 histone acetyltransferase activity	-1.5345	0.913	0.733
GO:0032357	oxidized purine DNA binding	-1.6467	0.927	0.734
GO:0070410	co-SMAD binding	-3.3468	0.97	0.738
GO:0004719	protein-L-isoaspartate (D-aspartate) O-methyltransferase activity	-1.5345	0.883	0.739
GO:0046976	histone methyltransferase activity (H3-K27 specific)	-3.8239	0.882	0.739
GO:0004716	signal transducer, downstream of receptor, with protein tyrosine kinase activity	-1.8122	0.87	0.743
GO:0043022	ribosome binding	-2.7423	0.952	0.748
GO:0032183	SUMO binding	-3.1739	0.969	0.75
GO:0001164	RNA polymerase I CORE element sequence-specific DNA binding	-1.8122	0.905	0.751
GO:0001163	RNA polymerase I regulatory region sequence-specific DNA binding	-1.8122	0.919	0.984
GO:0043140	ATP-dependent 3'-5' DNA helicase activity	-2.3019	0.918	0.753
GO:0048487	beta-tubulin binding	-2.6946	0.954	0.757
GO:0008139	nuclear localization sequence binding	-1.9401	0.973	0.759
GO:0016278	lysine N-methyltransferase activity	-1.7147	0.861	0.762
GO:0046974	histone methyltransferase activity (H3-K9 specific)	-1.8122	0.878	0.766
GO:0004861	cyclin-dependent protein serine/threonine kinase inhibitor activity	-1.3972	0.95	0.766
GO:0008143	poly(A) binding	-1.6022	0.919	0.77
GO:0004707	MAP kinase activity	-1.9059	0.866	0.77
GO:0001540	beta-amyloid binding	-1.9566	0.973	0.771
GO:0042605	peptide antigen binding	-1.7411	0.973	0.771
GO:0050815	phosphoserine binding	-1.6467	0.954	0.771
GO:0019003	GDP binding	-2.7496	0.935	0.774
GO:0043024	ribosomal small subunit binding	-1.9059	0.956	0.776
GO:0016859	cis-trans isomerase activity	-1.3865	0.934	0.778
GO:0017016	Ras GTPase binding	-1.5556	0.907	0.785
GO:0031267	small GTPase binding	-1.605	0.906	0.95
GO:0003712	transcription cofactor activity	-1.8002	0.961	0.791
GO:0005048	signal sequence binding	-1.727	0.972	0.796
GO:0008187	poly-pyrimidine tract binding	-1.9654	0.917	0.797
GO:0032549	ribonucleoside binding	-1.5432	0.916	0.798
GO:0070039	rRNA (guanosine-2'-O-)-methyltransferase activity	-1.5345	0.886	0.806
GO:0019888	protein phosphatase regulator activity	-1.7582	0.951	0.807
GO:0016274	protein-arginine N-methyltransferase activity	-2.426	0.87	0.812
GO:0008469	histone-arginine N-methyltransferase activity	-1.9776	0.872	0.97
GO:0035242	protein-arginine omega-N asymmetric methyltransferase activity	-1.6467	0.878	0.935
GO:0044020	histone methyltransferase activity (H4-R3 specific)	-1.5345	0.876	0.935
GO:0047134	protein-disulfide reductase activity	-1.3234	0.926	0.821
GO:0035257	nuclear hormone receptor binding	-1.3593	0.907	0.822
GO:0001055	RNA polymerase II activity	-2.3143	0.892	0.824
GO:0003678	DNA helicase activity	-2.8182	0.909	0.827
GO:0003691	double-stranded telomeric DNA binding	-1.517	0.911	0.828
GO:0003746	translation elongation factor activity	-2.6635	0.92	0.829
GO:0001105	RNA polymerase II transcription coactivator activity	-2.059	0.962	0.833
GO:0001190	transcriptional activator activity, RNA polymerase II transcription factor binding	-1.6062	0.961	0.965
GO:0042800	histone methyltransferase activity (H3-K4 specific)	-2.8697	0.869	0.84
GO:0004826	phenylalanine-tRNA ligase activity	-1.9183	0.934	0.842
GO:0086083	cell adhesive protein binding involved in bundle of His cell-Purkinje myocyte communication	-1.9183	0.97	0.851
GO:0004714	transmembrane receptor protein tyrosine kinase activity	-1.5009	0.848	0.852
GO:0034237	protein kinase A regulatory subunit binding	-1.3395	0.968	0.852
GO:0005068	transmembrane receptor protein tyrosine kinase adaptor activity	-1.4429	0.853	0.852
GO:0000993	RNA polymerase II core binding	-2.6126	0.89	0.856
GO:0004887	thyroid hormone receptor activity	-1.9776	0.949	0.857
GO:0005003	ephrin receptor activity	-1.5504	0.86	0.859
GO:0015037	peptide disulfide oxidoreductase activity	-1.3972	0.925	0.86
GO:0000403	Y-form DNA binding	-2.3019	0.927	0.861
GO:0001026	TFIIIB-type transcription factor activity	-1.5345	0.969	0.867
GO:0030674	protein binding, bridging	-2.6737	0.96	0.868
GO:1990948	ubiquitin ligase inhibitor activity	-1.3234	0.95	0.87
GO:0004003	ATP-dependent DNA helicase activity	-1.8983	0.908	0.871
GO:0001222	transcription corepressor binding	-1.4429	0.934	0.872
GO:0061659	ubiquitin-like protein ligase activity	-1.9311	0.883	0.874
GO:0035174	histone serine kinase activity	-1.3234	0.886	0.877
GO:0003729	mRNA binding	-2.3696	0.901	0.881
GO:0055105	ubiquitin-protein transferase inhibitor activity	-1.6467	0.95	0.882
GO:0001091	RNA polymerase II basal transcription factor binding	-1.9197	0.928	0.884
GO:0043027	cysteine-type endopeptidase inhibitor activity involved in apoptotic process	-1.9401	0.948	0.888
GO:0032138	single base insertion or deletion binding	-1.5345	0.918	0.89
GO:0005164	tumor necrosis factor receptor binding	-1.3349	0.915	0.897
GO:1990837	sequence-specific double-stranded DNA binding	-2.7878	0.88	0.897
Cellular Component
GO_term_ID	description	log10 p-value	uniqueness	dispensability
GO:0005925	focal adhesion	-300	0.973	0
GO:0016442	RISC complex	-3.9586	0.815	0
GO:0043657	host cell	-3.585	0.975	0
GO:0090543	Flemming body	-3.4318	0.991	0.001
GO:0001772	immunological synapse	-3.4949	0.939	0.002
GO:0043218	compact myelin	-1.7042	0.983	0.002
GO:0031252	cell leading edge	-2.3391	0.99	0.002
GO:0032153	cell division site	-1.4815	0.99	0.002
GO:0032155	cell division site part	-1.4815	0.99	0.002
GO:0030496	midbody	-2.1805	0.99	0.003
GO:0005819	spindle	-3.8861	0.804	0.011
GO:0038201	TOR complex	-1.4584	0.979	0.012
GO:0016235	aggresome	-2.8297	0.978	0.013
GO:0016234	inclusion body	-3.1192	0.977	0.014
GO:0014069	postsynaptic density	-3.4318	0.964	0.022
GO:0005768	endosome	-3.8861	0.872	0.038
GO:0016528	sarcoplasm	-1.5223	0.965	0.046
GO:0000407	pre-autophagosomal structure	-1.3184	0.954	0.073
GO:0034399	nuclear periphery	-3.4685	0.863	0.088
GO:0045120	pronucleus	-2.0146	0.937	0.098
GO:0005765	lysosomal membrane	-2.6757	0.842	0.099
GO:0034365	discoidal high-density lipoprotein particle	-3.5686	0.867	0.116
GO:0098552	side of membrane	-2.1568	0.957	0.127
GO:0042383	sarcolemma	-2.6162	0.956	0.156
GO:0005829	cytosol	-300	0.929	0.158
GO:0045171	intercellular bridge	-1.8348	0.989	0.161
GO:1990234	transferase complex	-3.8861	0.723	0.18
GO:0036038	MKS complex	-3.8539	0.75	0.182
GO:0002193	MAML1-RBP-Jkappa- ICN1 complex	-1.5849	0.835	0.185
GO:0031838	haptoglobin-hemoglobin complex	-1.5849	0.835	0.185
GO:0071664	catenin-TCF7L2 complex	-1.5849	0.8	0.185
GO:0071818	BAT3 complex	-3.5686	0.809	0.185
GO:0005850	eukaryotic translation initiation factor 2 complex	-1.5849	0.814	0.188
GO:0005853	eukaryotic translation elongation factor 1 complex	-1.3799	0.814	0.188
GO:0097452	GAIT complex	-1.5849	0.833	0.188
GO:1990726	Lsm1-7-Pat1 complex	-1.8986	0.833	0.188
GO:0097136	Bcl-2 family protein complex	-1.3799	0.83	0.191
GO:0097255	R2TP complex	-1.9809	0.83	0.191
GO:1990393	3M complex	-1.9809	0.83	0.191
GO:0033588	Elongator holoenzyme complex	-2.3778	0.823	0.193
GO:0070937	CRD-mediated mRNA stability complex	-1.3799	0.81	0.193
GO:0031931	TORC1 complex	-1.7156	0.821	0.195
GO:0071541	eukaryotic translation initiation factor 3 complex, eIF3m	-2.0585	0.808	0.195
GO:0005652	nuclear lamina	-1.5913	0.886	0.196
GO:0090576	RNA polymerase III transcription factor complex	-2.762	0.775	0.197
GO:0002199	zona pellucida receptor complex	-3.1675	0.824	0.198
GO:0071141	SMAD protein complex	-2.4078	0.818	0.198
GO:0030877	beta-catenin destruction complex	-3.1192	0.802	0.201
GO:0017101	aminoacyl-tRNA synthetase multienzyme complex	-1.8038	0.815	0.205
GO:0032300	mismatch repair complex	-3.1675	0.806	0.205
GO:0032797	SMN complex	-1.4584	0.815	0.205
GO:0043240	Fanconi anaemia nuclear complex	-1.4821	0.759	0.207
GO:0035145	exon-exon junction complex	-2.7747	0.773	0.213
GO:0071203	WASH complex	-1.8986	0.798	0.215
GO:0034719	SMN-Sm protein complex	-1.6621	0.797	0.216
GO:0090665	glycoprotein complex	-1.6621	0.815	0.22
GO:0044815	DNA packaging complex	-1.6057	0.84	0.222
GO:0070971	endoplasmic reticulum exit site	-2.8633	0.881	0.222
GO:0017053	transcriptional repressor complex	-3.4318	0.839	0.223
GO:0042645	mitochondrial nucleoid	-3.5376	0.83	0.238
GO:0016342	catenin complex	-2.762	0.763	0.242
GO:0035631	CD40 receptor complex	-3.1192	0.825	0.244
GO:0005657	replication fork	-3.7959	0.807	0.249
GO:0005811	lipid particle	-1.3569	0.878	0.251
GO:0016327	apicolateral plasma membrane	-1.9598	0.935	0.254
GO:0030018	Z disc	-3.3372	0.801	0.264
GO:0044449	contractile fiber part	-2.3872	0.793	0.917
GO:0030017	sarcomere	-1.454	0.794	0.963
GO:0030016	myofibril	-2.1586	0.807	0.975
GO:0005643	nuclear pore	-3.3979	0.721	0.267
GO:0016328	lateral plasma membrane	-3.0177	0.936	0.275
GO:0009898	cytoplasmic side of plasma membrane	-2.3799	0.91	0.318
GO:0005790	smooth endoplasmic reticulum	-2.0516	0.896	0.322
GO:0032156	septin cytoskeleton	-1.7156	0.879	0.327
GO:0098796	membrane protein complex	-3.1938	0.743	0.34
GO:0097443	sorting endosome	-1.3799	0.906	0.34
GO:0001726	ruffle	-3.5686	0.937	0.343
GO:0097386	glial cell projection	-1.4396	0.947	0.351
GO:0031143	pseudopodium	-1.4454	0.947	0.353
GO:0097038	perinuclear endoplasmic reticulum	-2.214	0.882	0.353
GO:0042382	paraspeckles	-1.3799	0.872	0.353
GO:0016529	sarcoplasmic reticulum	-1.3087	0.892	0.362
GO:0044352	pinosome	-1.3799	0.906	0.368
GO:0044354	macropinosome	-1.3799	0.906	0.368
GO:0005654	nucleoplasm	-300	0.813	0.368
GO:0071682	endocytic vesicle lumen	-2.4949	0.877	0.377
GO:0031428	box C/D snoRNP complex	-1.7156	0.747	0.387
GO:0035068	micro-ribonucleoprotein complex	-3.5686	0.822	0.387
GO:0070761	pre-snoRNP complex	-2.7747	0.822	0.387
GO:0005786	signal recognition particle, endoplasmic reticulum targeting	-1.3799	0.807	0.391
GO:0030906	retromer, cargo-selective complex	-1.5849	0.775	0.4
GO:0005794	Golgi apparatus	-1.7997	0.873	0.405
GO:0005784	Sec61 translocon complex	-1.5849	0.732	0.406
GO:0030175	filopodium	-3.3188	0.936	0.414
GO:0005726	perichromatin fibrils	-1.9809	0.745	0.419
GO:0032838	cell projection cytoplasm	-3.2076	0.873	0.423
GO:0030176	integral component of endoplasmic reticulum membrane	-2.0297	0.833	0.425
GO:0043232	intracellular non-membrane-bounded organelle	-3.7959	0.821	0.429
GO:0002102	podosome	-2.757	0.709	0.433
GO:0034098	VCP-NPL4-UFD1 AAA ATPase complex	-1.8986	0.73	0.445
GO:0005798	Golgi-associated vesicle	-1.4465	0.867	0.446
GO:0005844	polysome	-3.3565	0.797	0.446
GO:0070578	RISC-loading complex	-3.1675	0.761	0.448
GO:0030904	retromer complex	-2.5884	0.75	0.448
GO:0070062	extracellular exosome	-300	0.934	0.457
GO:0008540	proteasome regulatory particle, base subcomplex	-3.8539	0.751	0.458
GO:0005783	endoplasmic reticulum	-1.3525	0.871	0.463
GO:0045111	intermediate filament cytoskeleton	-1.8771	0.842	0.463
GO:0005732	small nucleolar ribonucleoprotein complex	-1.8752	0.809	0.463
GO:0012507	ER to Golgi transport vesicle membrane	-2.2396	0.843	0.463
GO:0033178	proton-transporting two-sector ATPase complex, catalytic domain	-2.2941	0.777	0.466
GO:0000800	lateral element	-1.8038	0.781	0.467
GO:0000153	cytoplasmic ubiquitin ligase complex	-2.5361	0.754	0.469
GO:0000164	protein phosphatase type 1 complex	-3.3279	0.772	0.469
GO:0005750	mitochondrial respiratory chain complex III	-2.8633	0.684	0.469
GO:0000803	sex chromosome	-1.6548	0.842	0.469
GO:0030687	preribosome, large subunit precursor	-2.8962	0.806	0.472
GO:0005671	Ada2/Gcn5/Ada3 transcription activator complex	-3.8861	0.696	0.476
GO:0005689	U12-type spliceosomal complex	-2.0857	0.761	0.478
GO:0055037	recycling endosome	-1.8611	0.881	0.481
GO:0016581	NuRD complex	-3.8861	0.7	0.481
GO:0044853	plasma membrane raft	-1.9045	0.908	0.482
GO:0005721	pericentric heterochromatin	-3.4815	0.72	0.483
GO:0000930	gamma-tubulin complex	-2.6968	0.718	0.484
GO:0035098	ESC/E(Z) complex	-2.7747	0.696	0.484
GO:0030425	dendrite	-3.0506	0.916	0.491
GO:0000178	exosome (RNase complex)	-2.382	0.774	0.496
GO:0000176	nuclear exosome (RNase complex)	-1.4821	0.747	0.947
GO:0000177	cytoplasmic exosome (RNase complex)	-1.4821	0.772	0.94
GO:0010494	cytoplasmic stress granule	-2.0675	0.731	0.497
GO:0015629	actin cytoskeleton	-2.757	0.833	0.501
GO:0035861	site of double-strand break	-2.4815	0.817	0.502
GO:0044224	juxtaparanode region of axon	-1.8038	0.932	0.503
GO:0035253	ciliary rootlet	-2.214	0.803	0.508
GO:0097539	ciliary transition fiber	-1.8986	0.753	0.508
GO:0005832	chaperonin-containing T-complex	-2.762	0.791	0.531
GO:0005881	cytoplasmic microtubule	-3.2441	0.802	0.532
GO:0000835	ER ubiquitin ligase complex	-1.3799	0.717	0.534
GO:0035867	alphav-beta3 integrin-IGF-1-IGF1R complex	-1.5849	0.781	0.536
GO:0005871	kinesin complex	-1.6844	0.703	0.537
GO:0035327	transcriptionally active chromatin	-3.3468	0.732	0.537
GO:0070187	telosome	-2.3778	0.726	0.539
GO:0098576	lumenal side of membrane	-1.3799	0.903	0.54
GO:0044451	nucleoplasm part	-1.7846	0.83	0.541
GO:0044294	dendritic growth cone	-1.5913	0.931	0.541
GO:0097546	ciliary base	-2.7959	0.881	0.546
GO:0031265	CD95 death-inducing signaling complex	-2.3778	0.775	0.55
GO:0031462	Cul2-RING ubiquitin ligase complex	-2.214	0.769	0.552
GO:0005641	nuclear envelope lumen	-3.0088	0.856	0.554
GO:0044754	autolysosome	-1.5913	0.93	0.555
GO:0000791	euchromatin	-2.0545	0.725	0.556
GO:0005757	mitochondrial permeability transition pore complex	-1.5849	0.779	0.557
GO:0071007	U2-type catalytic step 2 spliceosome	-2.061	0.755	0.558
GO:0005719	nuclear euchromatin	-1.6482	0.709	0.56
GO:0097342	ripoptosome	-2.3778	0.776	0.56
GO:0038039	G-protein coupled receptor heterodimeric complex	-2.0585	0.842	0.561
GO:0031941	filamentous actin	-2.061	0.697	0.562
GO:0005759	mitochondrial matrix	-2.2062	0.86	0.564
GO:0043596	nuclear replication fork	-1.5645	0.766	0.566
GO:0010369	chromocenter	-1.7438	0.819	0.566
GO:0000793	condensed chromosome	-2.2924	0.814	0.567
GO:0005635	nuclear envelope	-2.9706	0.811	0.569
GO:0044292	dendrite terminus	-1.4821	0.93	0.569
GO:0098589	membrane region	-1.7953	0.937	0.57
GO:0000126	transcription factor TFIIIB complex	-1.5849	0.796	0.573
GO:0000127	transcription factor TFIIIC complex	-1.3799	0.782	0.902
GO:1902554	serine/threonine protein kinase complex	-3.2441	0.733	0.575
GO:0000307	cyclin-dependent protein kinase holoenzyme complex	-1.6517	0.71	0.903
GO:0005802	trans-Golgi network	-1.3407	0.871	0.575
GO:0034708	methyltransferase complex	-1.8761	0.742	0.575
GO:0044613	nuclear pore central transport channel	-1.3799	0.754	0.575
GO:1905368	peptidase complex	-2.5719	0.766	0.576
GO:0031594	neuromuscular junction	-1.6844	0.986	0.577
GO:0098797	plasma membrane protein complex	-1.9809	0.718	0.578
GO:0031467	Cul7-RING ubiquitin ligase complex	-1.9809	0.781	0.58
GO:0005840	ribosome	-1.8262	0.694	0.581
GO:0005763	mitochondrial small ribosomal subunit	-1.5039	0.722	0.582
GO:0043296	apical junction complex	-2.7747	0.975	0.582
GO:0090724	central region of growth cone	-1.5849	0.936	0.586
GO:0031465	Cul4B-RING E3 ubiquitin ligase complex	-1.9809	0.777	0.588
GO:0097440	apical dendrite	-2.0146	0.933	0.588
GO:0097550	transcriptional preinitiation complex	-1.3799	0.859	0.589
GO:0035371	microtubule plus-end	-2.224	0.825	0.59
GO:0001725	stress fiber	-2.451	0.824	0.592
GO:0000444	MIS12/MIND type complex	-1.5849	0.721	0.594
GO:0031262	Ndc80 complex	-1.9809	0.724	0.594
GO:0036019	endolysosome	-2.172	0.88	0.596
GO:0097525	spliceosomal snRNP complex	-1.493	0.75	0.597
GO:0016010	dystrophin-associated glycoprotein complex	-1.6621	0.757	0.598
GO:0016602	CCAAT-binding factor complex	-1.5849	0.784	0.598
GO:0044450	microtubule organizing center part	-1.8722	0.802	0.6
GO:0031312	extrinsic component of organelle membrane	-1.8533	0.893	0.6
GO:0031466	Cul5-RING ubiquitin ligase complex	-1.7156	0.774	0.601
GO:0030532	small nuclear ribonucleoprotein complex	-1.3865	0.75	0.604
GO:0035976	transcription factor AP-1 complex	-1.9809	0.781	0.606
GO:0035748	myelin sheath abaxonal region	-1.3799	0.983	0.615
GO:0005915	zonula adherens	-2.4078	0.975	0.615
GO:0030132	clathrin coat of coated pit	-1.4396	0.713	0.625
GO:0042613	MHC class II protein complex	-1.4336	0.759	0.626
GO:0031201	SNARE complex	-1.9223	0.743	0.629
GO:0042641	actomyosin	-1.8085	0.821	0.63
GO:0097165	nuclear stress granule	-1.9809	0.757	0.632
GO:0035032	phosphatidylinositol 3-kinase complex, class III	-2.3778	0.762	0.634
GO:0098553	lumenal side of endoplasmic reticulum membrane	-1.7655	0.846	0.636
GO:0070013	intracellular organelle lumen	-2.0899	0.852	0.639
GO:0043220	Schmidt-Lanterman incisure	-1.4821	0.983	0.64
GO:0005876	spindle microtubule	-2.8297	0.809	0.64
GO:0043198	dendritic shaft	-1.5331	0.924	0.645
GO:0030056	hemidesmosome	-2.3778	0.98	0.646
GO:0005680	anaphase-promoting complex	-2.1343	0.723	0.647
GO:0051233	spindle midzone	-2.4989	0.835	0.656
GO:0061695	transferase complex, transferring phosphorus-containing groups	-1.9024	0.727	0.659
GO:0031258	lamellipodium membrane	-3.3468	0.882	0.665
GO:0005874	microtubule	-3.5528	0.778	0.668
GO:0008305	integrin complex	-3	0.745	0.676
GO:0033267	axon part	-2.1337	0.918	0.676
GO:0071010	prespliceosome	-1.8941	0.766	0.683
GO:0005884	actin filament	-1.9094	0.8	0.688
GO:0010008	endosome membrane	-1.8063	0.805	0.691
GO:0080008	Cul4-RING E3 ubiquitin ligase complex	-2.0545	0.754	0.693
GO:0071011	precatalytic spliceosome	-1.4821	0.762	0.697
GO:0000786	nucleosome	-1.7106	0.704	0.699
GO:1904115	axon cytoplasm	-1.8989	0.868	0.7
GO:0034451	centriolar satellite	-1.8511	0.827	0.701
GO:0005905	clathrin-coated pit	-1.3569	0.903	0.701
GO:0036020	endolysosome membrane	-1.7438	0.841	0.703
GO:0005916	fascia adherens	-1.8986	0.975	0.707
GO:0072686	mitotic spindle	-2.3045	0.824	0.707
GO:0000228	nuclear chromosome	-1.9574	0.729	0.708
GO:0030864	cortical actin cytoskeleton	-3.0223	0.775	0.709
GO:0031105	septin complex	-1.3799	0.718	0.718
GO:0005669	transcription factor TFIID complex	-2.2526	0.663	0.722
GO:0032433	filopodium tip	-1.9598	0.933	0.727
GO:0031595	nuclear proteasome complex	-1.5913	0.721	0.73
GO:0000151	ubiquitin ligase complex	-1.8297	0.718	0.731
GO:0042765	GPI-anchor transamidase complex	-1.9809	0.736	0.733
GO:0071004	U2-type prespliceosome	-1.9598	0.767	0.738
GO:0001739	sex chromatin	-2.3778	0.73	0.74
GO:0000124	SAGA complex	-3.5376	0.695	0.74
GO:0031597	cytosolic proteasome complex	-3.8539	0.731	0.74
GO:0098556	cytoplasmic side of rough endoplasmic reticulum membrane	-1.3799	0.864	0.741
GO:0098554	cytoplasmic side of endoplasmic reticulum membrane	-1.7438	0.856	0.741
GO:0031527	filopodium membrane	-1.9598	0.88	0.743
GO:0005666	DNA-directed RNA polymerase III complex	-2.224	0.716	0.746
GO:0043034	costamere	-1.9212	0.827	0.747
GO:0005901	caveola	-1.5817	0.908	0.75
GO:0036379	myofilament	-1.6482	0.826	0.75
GO:0005769	early endosome	-1.7716	0.873	0.754
GO:0000777	condensed chromosome kinetochore	-2.9318	0.655	0.755
GO:0005865	striated muscle thin filament	-1.8941	0.802	0.755
GO:0030478	actin cap	-1.5849	0.812	0.757
GO:0032039	integrator complex	-1.9598	0.696	0.76
GO:0098562	cytoplasmic side of membrane	-1.8857	0.941	0.762
GO:0005913	cell-cell adherens junction	-3.6198	0.974	0.764
GO:0044666	MLL3/4 complex	-1.5913	0.735	0.765
GO:0031010	ISWI-type complex	-1.5226	0.772	0.765
GO:0034366	spherical high-density lipoprotein particle	-1.7438	0.856	0.777
GO:0031011	Ino80 complex	-3.2441	0.636	0.778
GO:0000812	Swr1 complex	-2.762	0.693	0.912
GO:0043197	dendritic spine	-2.8125	0.908	0.78
GO:0005952	cAMP-dependent protein kinase complex	-3.1675	0.768	0.784
GO:0019907	cyclin-dependent protein kinase activating kinase holoenzyme complex	-1.5913	0.71	0.784
GO:0048188	Set1C/COMPASS complex	-2.5361	0.728	0.785
GO:0000778	condensed nuclear chromosome kinetochore	-2.214	0.691	0.788
GO:0000781	chromosome, telomeric region	-2.2924	0.785	0.789
GO:0044440	endosomal part	-1.8542	0.836	0.792
GO:0016580	Sin3 complex	-2.3925	0.66	0.797
GO:0005663	DNA replication factor C complex	-1.3799	0.727	0.797
GO:0044448	cell cortex part	-2.251	0.902	0.797
GO:0032777	Piccolo NuA4 histone acetyltransferase complex	-1.5849	0.719	0.797
GO:0033180	proton-transporting V-type ATPase, V1 domain	-1.5913	0.786	0.804
GO:0099513	polymeric cytoskeletal fiber	-1.659	0.772	0.806
GO:0000940	condensed chromosome outer kinetochore	-2.3925	0.702	0.806
GO:0001740	Barr body	-1.5849	0.8	0.807
GO:0016600	flotillin complex	-1.7438	0.75	0.812
GO:0071256	translocon complex	-1.5849	0.732	0.813
GO:0032389	MutLalpha complex	-1.5849	0.779	0.814
GO:0031672	A band	-1.7286	0.816	0.817
GO:0008385	IkappaB kinase complex	-1.7042	0.74	0.817
GO:0031464	Cul4A-RING E3 ubiquitin ligase complex	-1.8038	0.767	0.833
GO:0019908	nuclear cyclin-dependent protein kinase holoenzyme complex	-2.224	0.695	0.836
GO:0000125	PCAF complex	-2.3778	0.717	0.839
GO:0000794	condensed nuclear chromosome	-2.2668	0.752	0.839
GO:0000159	protein phosphatase type 2A complex	-3.0555	0.779	0.84
GO:0000123	histone acetyltransferase complex	-1.6743	0.693	0.841
GO:0005720	nuclear heterochromatin	-3.3665	0.698	0.841
GO:0000109	nucleotide-excision repair complex	-2.0146	0.776	0.843
GO:0000314	organellar small ribosomal subunit	-1.5039	0.735	0.844
GO:0071556	integral component of lumenal side of endoplasmic reticulum membrane	-1.7655	0.841	0.847
GO:0000502	proteasome complex	-1.6256	0.717	0.847
GO:1905369	endopeptidase complex	-1.7662	0.757	0.947
GO:0031429	box H/ACA snoRNP complex	-1.3799	0.699	0.853
GO:0072588	box H/ACA RNP complex	-1.3799	0.785	0.853
GO:0000942	condensed nuclear chromosome outer kinetochore	-1.5849	0.706	0.856
GO:0043025	neuronal cell body	-1.8187	0.948	0.863
GO:0032806	carboxy-terminal domain protein kinase complex	-1.4904	0.687	0.865
GO:0005677	chromatin silencing complex	-2.4078	0.793	0.873
GO:0032839	dendrite cytoplasm	-1.6482	0.872	0.878
GO:0005764	lysosome	-1.4121	0.902	0.878
GO:0000323	lytic vacuole	-1.4121	0.903	0.919
GO:0005686	U2 snRNP	-1.4396	0.77	0.883
GO:0005862	muscle thin filament tropomyosin	-1.5849	0.82	0.884
GO:0030863	cortical cytoskeleton	-1.4556	0.799	0.887
GO:0000776	kinetochore	-2.3107	0.653	0.895
	uniqueness: The value representing how different a GO term is in relation to other terms
	dispensability: The value representing the degree of GO term redundancy and enrichment

## Sheet: KEGG pathways for Gains
Supplementary Table vIe: Enriched KEGG pathways for proteins involved in egdetic gains
KEGG pathway	Genes	Fold Enrichment	Bonferroni	FDR
hsa04110:Cell cycle	8881, 8317, 8318, 10926, 64682, 1387, 4193, 25, 27127, 545, 472, 51434, 5934, 5933, 4609, 8243, 6500, 7040, 10274, 5347, 9978, 7043, 10735, 595, 4173, 23594, 8379, 4175, 4174, 7529, 890, 4176, 699, 1111, 4171, 9232, 996, 994, 995, 993, 990, 9184, 991, 7534, 894, 7533, 891, 7532, 7531, 898, 23595, 896, 1869, 2810, 7027, 7709, 9700, 983, 701, 5885, 51529, 5925, 6502, 8454, 4088, 4089, 29882, 7029, …	1.8236817782443489	1.819635191845611E-15	8.293007635424135E-15
hsa05169:Epstein-Barr virus infection	5436, 3725, 5437, 5434, 6774, 7297, 9861, 3683, 9451, 51082, 8737, 1387, 1386, 2959, 8021, 930, 6688, 4193, 6885, 3716, 207, 208, 3718, 10621, 4791, 4790, 4793, 4792, 4609, 4794, 1457, 1459, 1432, 7514, 5970, 2268, 3312, 5610, 3315, 3316, 7189, 10014, 7188, 7187, 7186, 3516, 23118, 1460, 7185, 23586, 596, 7529, 890, 5566, 10213, 9759, 7431, 5335, 5336, 27102, 7534, 11128, 5430, 7533, 5433, 7532, …	1.6395131741476858	9.725553695716371E-14	4.440892098500626E-13
hsa05203:Viral carcinogenesis	3725, 6774, 128312, 23513, 1108, 2648, 79885, 1388, 1387, 10488, 1386, 2959, 51564, 4193, 1385, 3716, 3718, 7337, 4893, 6777, 8294, 5934, 6776, 5933, 4791, 4790, 4792, 5970, 3845, 5610, 55869, 10014, 7188, 11036, 7187, 7186, 3516, 10013, 245972, 7185, 5829, 1642, 5966, 595, 8379, 7529, 5423, 890, 8850, 5566, 1111, 9759, 3017, 2966, 2965, 718, 991, 6672, 7534, 894, 7533, 7532, 7531, 898, 998, 88, …	1.6081424655111425	1.1994849558050191E-12	5.46229728115577E-12
hsa04120:Ubiquitin mediated proteolysis	8881, 55236, 10401, 330, 9246, 331, 5371, 8925, 8924, 64682, 27339, 27338, 63893, 9040, 4214, 9354, 672, 4193, 51619, 3093, 51366, 7337, 64326, 54926, 26259, 4591, 10477, 51434, 8554, 57154, 10273, 7327, 7326, 8945, 7329, 7328, 8651, 6500, 7189, 23291, 7332, 10277, 7334, 23327, 1643, 9978, 9021, 6477, 1642, 9616, 329, 65264, 7318, 7428, 7317, 23624, 7319, 7320, 10075, 996, 7321, 7324, 7325, 7322,…	1.7234052588138191	1.588507103633674E-12	7.238654120556021E-12
hsa05200:Pathways in cancer	3725, 6774, 10342, 6772, 5733, 2335, 59345, 3479, 330, 331, 5371, 3728, 3480, 51176, 8326, 2956, 6093, 1488, 1487, 5747, 3091, 25, 3716, 207, 7481, 7480, 208, 4893, 7175, 25780, 3914, 3915, 8313, 6777, 6776, 4791, 4790, 3912, 4792, 1495, 7170, 4609, 8031, 3845, 1438, 7189, 7188, 7187, 7040, 7186, 9978, 7048, 7185, 7046, 4233, 7043, 5899, 5898, 2308, 329, 51684, 324, 10319, 23624, 51384, 5335, 533…	1.37448475195698	9.715828142020655E-10	4.428002409184728E-9
hsa05206:MicroRNAs in cancer	2146, 6774, 63923, 10298, 7168, 10297, 1387, 3925, 6768, 5159, 6093, 9252, 4194, 4318, 672, 4193, 25, 1591, 4893, 472, 7078, 4790, 4609, 113130, 3845, 7329, 8651, 1786, 1788, 1789, 10018, 4233, 595, 596, 5154, 599, 5155, 5156, 324, 4170, 1398, 7431, 7430, 994, 1399, 995, 5335, 5336, 993, 894, 898, 7057, 1869, 4854, 4853, 5894, 5579, 648, 5578, 6464, 4851, 2475, 387, 23405, 9493, 3236, 3190, 578, …	1.6112384941710587	8.994289313335457E-9	4.0991576799598306E-8
hsa05161:Hepatitis B	3725, 6774, 2002, 6772, 6773, 3339, 10542, 1388, 1387, 10488, 1386, 537, 4318, 4214, 1385, 3716, 207, 208, 4893, 6777, 6776, 4790, 6778, 4792, 4609, 64135, 4776, 5970, 3845, 7040, 1643, 7046, 23586, 1642, 7043, 595, 596, 7529, 890, 7534, 2185, 4773, 4772, 898, 843, 841, 1869, 1147, 5894, 5579, 5578, 7124, 148327, 8772, 5582, 5601, 5602, 581, 5604, 5925, 836, 2885, 9586, 1654, 5595, 4089, 5594, 10…	1.6266427605127223	1.1622133810895718E-8	5.2968007757669966E-8
hsa05166:HTLV-I infection	3725, 8881, 2005, 2002, 54107, 331, 3683, 5534, 2648, 1390, 64682, 10297, 1387, 8326, 1386, 4488, 5159, 4214, 6688, 1385, 3716, 7481, 207, 208, 7480, 3718, 8498, 4602, 7412, 4605, 4893, 3689, 472, 545, 51434, 6777, 6776, 4791, 4790, 8295, 4792, 83660, 4609, 1437, 10524, 115650, 4776, 7514, 5970, 3845, 7416, 7417, 821, 7040, 4801, 7048, 7046, 7043, 3113, 811, 5427, 595, 3115, 5154, 5155, 5423, 885…	1.438042664855259	2.8546347508040526E-8	1.3010029720206262E-7
hsa03010:Ribosome	11224, 9349, 6122, 6160, 6124, 11222, 6125, 6161, 6204, 6164, 6206, 6166, 6207, 6165, 6208, 51081, 6168, 6167, 6169, 9045, 6210, 2197, 124995, 3921, 6150, 6217, 6155, 6218, 6154, 6152, 63931, 6159, 6158, 6157, 7311, 6156, 64928, 65005, 25873, 6224, 6223, 65003, 10573, 6222, 79590, 6191, 51121, 6193, 6194, 9801, 6182, 6146, 6181, 6147, 6183, 6141, 6142, 6143, 6189, 4736, 51065, 6188, 6187, 55168, …	1.5934459694818506	1.285599788847236E-7	5.859135732144694E-7
hsa05220:Chronic myeloid leukemia	1869, 1147, 5781, 5894, 6464, 1488, 1487, 2122, 5604, 4193, 5925, 25, 207, 208, 4893, 2885, 6777, 5595, 6776, 4089, 4790, 4792, 4609, 6654, 5594, 861, 8517, 3265, 5970, 3845, 1029, 868, 867, 1027, 1026, 7040, 369, 7048, 7046, 7043, 595, 8503, 598, 1019, 23624, 7157, 1871, 1870, 1398, 5290, 5291, 1021, 1399, 3065, 613, 5294, 5295, 5296	1.7515917934205874	2.014887002910193E-6	9.182878768498881E-6
hsa03040:Spliceosome	988, 83443, 10291, 144983, 9410, 26121, 10992, 22938, 27339, 1665, 220988, 56259, 3192, 3190, 10713, 29896, 11325, 23020, 3305, 55696, 3306, 4686, 153527, 23451, 4116, 23450, 10907, 22985, 24148, 8449, 11338, 3183, 84991, 1655, 1659, 3310, 9785, 56949, 6637, 6636, 9984, 6633, 6634, 55110, 3312, 9092, 10523, 51691, 10084, 27316, 51340, 25804, 23350, 9775, 10946, 9879, 3178, 9129, 9716, 9128, 27258…	1.5507276182328213	3.005192337424134E-6	1.3696217160408253E-5
hsa04660:T cell receptor signaling pathway	3725, 5063, 1147, 5894, 940, 7124, 5062, 5534, 10298, 387, 29851, 5777, 5133, 5600, 5588, 5604, 5609, 5170, 6885, 207, 208, 9402, 7410, 4893, 2885, 5595, 4790, 3586, 4793, 4792, 5788, 6654, 1493, 5594, 4794, 4690, 1437, 920, 8517, 3265, 7006, 1432, 5970, 2932, 3845, 868, 867, 27040, 3702, 3458, 919, 8440, 959, 8503, 915, 5058, 916, 1019, 917, 5532, 23624, 1739, 5290, 5291, 5335, 2534, 4773, 4772,…	1.614645900387704	5.429249954835846E-6	2.474393119289431E-5
hsa05202:Transcriptional misregulation in cancer	4208, 942, 2005, 3479, 5371, 3728, 3684, 7490, 8013, 3480, 4613, 2209, 4211, 6495, 604, 4314, 5747, 4318, 4291, 6688, 4193, 4298, 4297, 7403, 9915, 4299, 3695, 929, 472, 4221, 4790, 4609, 1437, 7102, 8861, 5970, 171558, 2313, 51804, 1649, 7048, 4804, 7185, 4094, 4233, 5966, 597, 5154, 64083, 598, 2308, 6760, 7113, 51384, 3020, 894, 4005, 6757, 7849, 7704, 4353, 648, 7709, 55589, 5914, 1050, 1051,…	1.4813030597806862	6.363623988092648E-6	2.900237521252791E-5
hsa03460:Fanconi anemia pathway	55215, 3280, 2072, 2189, 79728, 57697, 641, 378708, 146956, 6117, 79008, 2175, 5888, 29089, 6119, 2176, 6118, 2177, 116028, 7398, 5889, 51426, 2067, 5429, 84464, 675, 4292, 672, 80198, 2178, 7156, 5980, 22909, 9894, 80233, 5395, 80010, 545, 2187, 2188, 55120, 83990, 91442, 201254	1.8398683029033223	1.3861296120909472E-5	6.31734291989261E-5
hsa04390:Hippo signaling pathway	55233, 10207, 154796, 23513, 55844, 10297, 51176, 8326, 7161, 7481, 7480, 3689, 8313, 166824, 1495, 4609, 3996, 3993, 1453, 1454, 8945, 84612, 7040, 23291, 27113, 7048, 7046, 7043, 10413, 595, 7529, 324, 5054, 51384, 23286, 7534, 4771, 7533, 894, 7532, 7531, 896, 999, 6657, 50855, 8463, 2246, 122786, 60485, 1857, 89780, 1856, 3397, 3398, 25937, 11186, 1855, 5590, 9113, 5501, 5499, 5500, 80326, 54…	1.4739152420451875	3.317536294156209E-5	1.511994795366789E-4
hsa05205:Proteoglycans in cancer	7291, 6774, 2002, 3339, 2335, 3479, 2099, 288, 3480, 3481, 1975, 8326, 6093, 4313, 5747, 4318, 6548, 3091, 5170, 4193, 7481, 3693, 207, 208, 7480, 1514, 3685, 3688, 4893, 7074, 7078, 4609, 1432, 2318, 2316, 3845, 2317, 3316, 7040, 5829, 4233, 595, 816, 818, 5566, 5058, 23624, 51384, 7430, 5335, 6383, 5336, 1839, 998, 7057, 7023, 5781, 5894, 5579, 5578, 7124, 2475, 7448, 387, 3236, 5777, 5582, 532…	1.4089158479097332	3.577568118784402E-5	1.6305084883372345E-4
hsa04932:Non-alcoholic fatty liver disease (NAFLD)	3725, 1351, 29796, 841, 1350, 840, 7124, 9451, 1050, 374291, 1347, 10062, 1345, 5601, 4217, 5602, 637, 1329, 581, 4296, 6256, 3552, 51094, 207, 208, 836, 7132, 7381, 4695, 3643, 1337, 4790, 5879, 7386, 7385, 7384, 54539, 4709, 5599, 4707, 4705, 5970, 4706, 2932, 4704, 4701, 2931, 4702, 4700, 10975, 27089, 4731, 5465, 125965, 7040, 7186, 5565, 5564, 5563, 5562, 1649, 9167, 9021, 126328, 10018, 937…	1.4646931376016978	9.690869590039952E-5	4.41682886376249E-4
hsa04668:TNF signaling pathway	843, 3725, 841, 840, 1147, 7124, 6347, 330, 148327, 192111, 3383, 6352, 1051, 8772, 8837, 1388, 10488, 8737, 1386, 5601, 4217, 4314, 5602, 5600, 4318, 9252, 5606, 10059, 5604, 5609, 6885, 5608, 1385, 7133, 207, 836, 208, 7132, 7412, 6364, 9586, 7128, 5595, 4790, 4792, 5594, 1437, 9530, 4049, 8517, 5599, 1432, 5970, 7188, 7187, 11035, 7186, 197259, 23118, 9021, 7185, 8717, 8503, 329, 5290, 5291, 3…	1.538483357916586	1.4185981434944317E-4	6.465714546877166E-4
hsa04068:FoxO signaling pathway	6774, 1147, 9456, 5894, 3479, 26260, 23710, 3480, 1387, 604, 5601, 5602, 5600, 5604, 5170, 1901, 4193, 207, 6502, 208, 10769, 4893, 2885, 472, 5934, 4088, 5595, 4089, 6446, 3643, 3586, 11337, 23411, 6654, 4087, 5594, 3265, 5599, 1432, 1956, 2033, 1454, 5105, 114907, 3845, 1027, 6794, 1026, 664, 1032, 1030, 7040, 5565, 6789, 369, 5564, 5563, 5562, 5347, 11345, 10110, 7048, 7046, 10018, 7874, 10733…	1.471894642322658	2.6900775777427555E-4	0.001226163264211877
hsa03008:Ribosome biogenesis in eukaryotes	2091, 54552, 10482, 9790, 10199, 55813, 55272, 55505, 55131, 22803, 84135, 51367, 29889, 55127, 55226, 166378, 23160, 3692, 54464, 51096, 81691, 138716, 55651, 10813, 4931, 26354, 1457, 65083, 1459, 7514, 10528, 10171, 29102, 51068, 54433, 23195, 5822, 1460, 6949, 10940, 4809, 83732, 27341, 10885, 134430, 1736, 5901, 23560, 51602, 10607, 9724, 10556, 10557, 55341, 84916	1.6382388998454243	2.811608738862992E-4	0.0012815657719933427
hsa04550:Signaling pathways regulating pluripotency of stem cells	6657, 84108, 7703, 6774, 3720, 5894, 648, 3479, 55183, 3625, 3624, 3480, 10297, 6929, 7994, 8326, 56916, 4211, 6498, 89780, 1857, 5600, 10336, 1856, 5604, 2263, 3397, 3398, 2264, 3716, 1855, 7481, 207, 3718, 208, 7480, 2261, 3717, 1852, 2260, 9869, 4893, 2885, 54361, 80326, 8313, 4088, 5595, 4089, 4086, 4609, 4087, 5594, 3265, 1432, 2932, 3845, 7477, 1749, 7472, 5080, 7473, 7475, 84759, 1499, 501…	1.4604110681118638	3.34010020824671E-4	0.0015224970773441981
hsa05212:Pancreatic cancer	1869, 1147, 6774, 5894, 6772, 5888, 5601, 5602, 5880, 675, 5604, 5925, 3716, 207, 208, 5595, 4088, 4089, 4790, 5879, 5594, 4087, 8517, 5599, 1956, 5970, 1029, 3845, 7040, 369, 7048, 7046, 7043, 595, 8503, 5899, 5898, 598, 1019, 10928, 7157, 1871, 1870, 5290, 5291, 1021, 5294, 5295, 5296, 998	1.6726075480939293	3.4923677051945656E-4	0.0015919157929311645
hsa04066:HIF-1 signaling pathway	2056, 6774, 5579, 5578, 5162, 5160, 3479, 6513, 2475, 3480, 1387, 1977, 7018, 6921, 5582, 6923, 27035, 3099, 3098, 3101, 4846, 4843, 7037, 5604, 3091, 207, 208, 6198, 6199, 8453, 5595, 7076, 2023, 3643, 4790, 6194, 5594, 1956, 2033, 5970, 1027, 3460, 1026, 9470, 3458, 3459, 5209, 2597, 9978, 2027, 2026, 4055, 596, 8503, 816, 818, 54583, 7428, 80201, 5054, 5290, 5291, 5335, 5336, 5294, 5295, 5296	1.549831036584907	4.267845152534644E-4	0.001945471435027546
hsa04520:Adherens junction	4301, 10580, 3480, 387, 1387, 51176, 81, 5777, 6615, 87, 5880, 5795, 8976, 8936, 6885, 2260, 8826, 5595, 4088, 4089, 71, 3643, 5879, 1495, 5594, 4087, 1457, 25945, 1459, 2033, 1956, 7414, 1496, 1499, 9855, 1460, 7048, 81607, 7046, 60, 7082, 4233, 117178, 6714, 51701, 7525, 5770, 2534, 5819, 88, 998, 5818, 999	1.6231360572348132	7.45278397829785E-4	0.0033978232050868584
hsa05168:Herpes simplex infection	3725, 6772, 29997, 6773, 6874, 6347, 7297, 5371, 10482, 9451, 8740, 6352, 1387, 29992, 83860, 6885, 3716, 3717, 1616, 54926, 4790, 4793, 4792, 1457, 64135, 1459, 5970, 6890, 8764, 5610, 6500, 7189, 7188, 7187, 7186, 23118, 1460, 9021, 7185, 23586, 3113, 3115, 27097, 9569, 718, 27102, 6672, 5430, 10189, 2969, 5819, 3123, 5818, 3122, 841, 1147, 5781, 7124, 983, 3434, 8772, 3106, 3190, 10445, 708, 3…	1.396880728044506	8.248910643755547E-4	0.003760930902030335
hsa03013:RNA transport	23511, 55746, 2332, 8672, 10482, 23279, 4927, 4928, 8668, 10921, 1974, 1975, 6612, 1977, 53371, 6613, 8021, 51367, 4686, 4116, 22985, 1982, 1981, 7175, 7341, 6606, 26986, 23636, 9984, 7514, 22794, 8761, 7329, 1915, 55110, 9883, 84220, 51808, 9775, 23191, 10940, 9631, 3837, 8663, 8662, 10419, 8661, 8667, 8666, 8665, 8664, 22916, 10605, 129401, 10189, 7919, 9513, 60528, 84305, 25929, 6396, 9972, 23…	1.3997634418111073	0.0010156021245790736	0.004630862766186183
hsa05215:Prostate cancer	1869, 1147, 5894, 3479, 148327, 2475, 4824, 3480, 1387, 51176, 10488, 5159, 5604, 2263, 5170, 4193, 5925, 1385, 207, 208, 2260, 4893, 2885, 9586, 5595, 4790, 4792, 6654, 5594, 8517, 3265, 2033, 1956, 5970, 56034, 2932, 3845, 1027, 1026, 1499, 369, 3320, 595, 5728, 596, 8503, 5154, 5155, 2308, 5156, 1017, 3326, 7157, 1871, 1870, 5290, 5291, 468, 5294, 898, 5295, 5296	1.5495651537513875	0.0011489930360173428	0.005239421970237856
hsa05219:Bladder cancer	3265, 1869, 5894, 1956, 1029, 3845, 1026, 369, 595, 4313, 6714, 4312, 4318, 9252, 5604, 4193, 1019, 5925, 11186, 7157, 1871, 2261, 1870, 4893, 7380, 5595, 1839, 23604, 1613, 1612, 4609, 7057, 5594, 999	1.8031525274573583	0.0017146610081846259	0.007820988121842731
hsa04919:Thyroid hormone signaling pathway	5330, 9968, 4854, 5333, 4853, 5894, 5579, 6772, 5578, 4851, 7249, 9862, 9282, 2099, 8841, 2648, 6513, 2475, 1387, 7068, 5582, 10231, 9611, 6548, 5604, 6257, 3091, 5170, 6258, 113026, 476, 4193, 6256, 478, 207, 208, 3685, 4893, 29079, 54361, 5595, 71, 4609, 5594, 117247, 25942, 3265, 2033, 2932, 3845, 2626, 8202, 5350, 1499, 8648, 5208, 60, 595, 6714, 8503, 1734, 8850, 2308, 5566, 7157, 5469, 1049…	1.449593208348072	0.0039037751648483	0.017824727609505597
hsa05214:Glioma	3265, 1869, 5579, 5894, 5578, 6464, 1956, 801, 3845, 1029, 3479, 1026, 2475, 3480, 369, 5582, 5159, 595, 5728, 8503, 5154, 5155, 816, 5156, 818, 5604, 4193, 1019, 5925, 207, 7157, 1871, 208, 1870, 810, 5290, 5291, 1021, 4893, 5335, 5336, 2885, 5595, 5294, 5295, 6654, 5296, 5594	1.6057032461701723	0.004030722925447261	0.018405492673678747
hsa05160:Hepatitis C	6774, 1147, 5894, 6772, 6773, 7124, 9071, 55844, 7297, 9075, 949, 9074, 9451, 9076, 3434, 8737, 10197, 10062, 5601, 5602, 5600, 5170, 6256, 10379, 3716, 207, 975, 208, 7132, 4893, 2885, 5595, 4790, 4792, 3646, 6654, 5594, 3661, 8554, 8517, 3265, 5599, 1432, 1956, 5970, 2932, 3845, 1026, 5610, 5521, 7189, 5465, 7187, 7186, 5516, 5515, 369, 5518, 3455, 1366, 5519, 3659, 9021, 8717, 23586, 57506, 85…	1.4373085201417326	0.004691309621976059	0.02142870866789215
hsa04141:Protein processing in endoplasmic reticulum	1410, 22872, 3337, 10294, 9451, 10299, 10484, 10483, 1388, 64215, 10134, 4217, 10808, 51619, 5034, 258010, 10477, 85479, 824, 10525, 6184, 823, 3998, 29979, 10273, 7327, 7415, 7326, 3312, 56886, 5611, 821, 6185, 5610, 10427, 6500, 7186, 10277, 3320, 23193, 1649, 81567, 9632, 9978, 6748, 6747, 4780, 6745, 10802, 811, 26270, 596, 3326, 7321, 79139, 7324, 7325, 7322, 27102, 7323, 9601, 10952, 10956,…	1.365622870059617	0.0049406505710475335	0.022570330856730436
hsa05210:Colorectal cancer	3725, 5599, 5894, 26060, 2932, 3845, 1499, 7040, 10297, 369, 387, 51176, 2956, 7048, 7046, 7043, 595, 5601, 5602, 5880, 596, 8503, 4292, 581, 5604, 4436, 324, 207, 7157, 836, 208, 4437, 5290, 5291, 8313, 5595, 4088, 4089, 2353, 5294, 5879, 5295, 4609, 5296, 5594, 4087	1.6132569576776934	0.005238850663390249	0.023936016080949862
hsa05142:Chagas disease (American trypanosomiasis)	3725, 5330, 841, 1147, 6349, 7124, 55844, 6347, 6352, 8772, 8837, 5601, 5602, 5600, 4843, 207, 208, 7132, 5595, 4088, 4790, 3586, 4792, 5594, 4087, 8517, 5599, 1432, 5970, 2767, 3460, 5521, 7189, 2770, 2771, 7040, 3458, 3459, 5516, 5515, 5518, 919, 5519, 7048, 7046, 3654, 7043, 811, 8503, 915, 2776, 916, 917, 2778, 2773, 2775, 5054, 2774, 5290, 5291, 355, 718, 5522, 713, 356, 712, 2353, 5294, 529…	1.4635316045821882	0.005626053622602156	0.02570989637212806
hsa05010:Alzheimer's disease	29796, 801, 487, 9451, 5534, 488, 374291, 539, 4311, 1329, 4035, 348, 10476, 4695, 824, 54539, 823, 3028, 51107, 27089, 2597, 3416, 9167, 102, 516, 515, 514, 9377, 2776, 23621, 498, 322, 810, 522, 6389, 23385, 1351, 5330, 1350, 841, 840, 7124, 8772, 1347, 1345, 506, 2902, 2903, 2904, 637, 776, 509, 775, 778, 836, 7132, 7381, 5595, 1337, 7386, 7385, 7384, 5594, 4709, 4707, 4705, 3708, 4706, 3709, …	1.3675407625925207	0.006135236973984215	0.028043605222505263
hsa03018:RNA degradation	10950, 23517, 9924, 54512, 87178, 23404, 22803, 56915, 6499, 9652, 51010, 7832, 51013, 23644, 4849, 4848, 54464, 5073, 1656, 84186, 2023, 5214, 29883, 26986, 11044, 11340, 170506, 3313, 246175, 8761, 118460, 51691, 5211, 80336, 9125, 25804, 23019, 25904, 27258, 23016, 2027, 22894, 2026, 694, 57472, 57819, 167227, 3329, 5394, 80153, 28960, 196513, 80349, 9337	1.544961182581498	0.006308811654017421	0.02883940022434528
hsa04380:Osteoclast differentiation	3725, 10859, 1147, 6772, 6773, 7124, 7297, 5534, 2209, 8878, 8600, 27035, 5601, 5602, 5600, 4688, 5604, 5609, 6688, 6885, 10379, 3552, 5608, 1385, 3716, 207, 4982, 208, 55423, 7132, 1513, 2885, 5595, 2215, 4791, 4790, 2212, 5879, 4792, 2214, 5594, 8517, 7006, 5599, 1432, 5970, 10326, 8651, 3460, 7189, 7040, 3458, 7186, 3459, 6850, 2274, 3455, 1540, 23118, 9021, 7048, 7046, 695, 29760, 8503, 14088…	1.4049903403989008	0.007541459835556319	0.034494592732736695
hsa04012:ErbB signaling pathway	3725, 5063, 5579, 5894, 6464, 2002, 685, 5578, 5062, 2475, 10298, 5582, 5601, 5602, 5747, 2065, 5604, 5609, 25, 27, 207, 208, 6198, 6199, 4893, 2885, 6777, 5595, 6776, 4609, 6654, 5594, 4690, 3265, 5599, 1956, 2932, 3845, 868, 867, 1027, 1026, 369, 8440, 6714, 8503, 816, 818, 5058, 23624, 1398, 5290, 5291, 1399, 5335, 5336, 1839, 5294, 5295, 5296	1.4995791810497296	0.008340435774514932	0.03816374836587144
hsa05223:Non-small cell lung cancer	3265, 1869, 5579, 5894, 5578, 5915, 1956, 3845, 1029, 6789, 369, 5582, 595, 8503, 2309, 5604, 6257, 6258, 5170, 1019, 5925, 6256, 11186, 207, 7157, 1871, 208, 1870, 5290, 5291, 1021, 4893, 5335, 5336, 2885, 5595, 5294, 5295, 238, 6654, 5296, 5594	1.6307923593915812	0.00879321292137536	0.04024430001793311
hsa05230:Central carbon metabolism in cancer	3265, 5894, 5162, 1956, 5160, 3845, 5211, 2475, 6513, 8140, 4233, 5159, 3099, 3101, 3098, 5728, 8503, 5223, 5156, 51548, 5604, 3091, 2263, 3815, 80201, 207, 7157, 208, 2261, 2260, 5290, 5291, 5979, 6510, 4893, 5595, 5315, 5214, 5294, 4914, 5295, 5296, 4609, 23410, 5594, 4916	1.5876497043812219	0.010184853373749636	0.046644696045150535
hsa00190:Oxidative phosphorylation	1351, 1350, 29796, 9550, 374291, 535, 533, 539, 537, 1347, 1345, 10063, 506, 1329, 509, 9296, 23545, 479, 7381, 9114, 10476, 4695, 1337, 7386, 7385, 7384, 54539, 4709, 4707, 4705, 4706, 4704, 4701, 4702, 10975, 4700, 4731, 51606, 27089, 90423, 125965, 10632, 245972, 9167, 126328, 245973, 516, 515, 514, 9377, 4728, 10312, 4729, 4719, 4724, 4712, 4723, 4726, 4714, 4725, 4715, 4720, 51382, 4722, 498…	1.4188814878322233	0.010520368773055622	0.04818907451653587
hsa05222:Small cell lung cancer	1869, 1147, 284217, 5915, 2335, 330, 331, 3674, 5747, 1284, 4843, 6257, 6258, 5925, 6256, 207, 6502, 208, 9063, 3685, 3688, 3914, 3915, 4790, 3912, 4792, 4609, 8517, 5970, 7189, 7188, 7187, 1030, 7186, 7185, 595, 5728, 3673, 596, 9618, 8503, 598, 329, 1017, 1019, 10319, 7157, 1871, 1870, 5290, 5291, 1021, 79444, 5294, 898, 5295, 1164, 5296	1.5013643943605033	0.011052309482326717	0.05063862399539154
hsa04064:NF-kappa B signaling pathway	1147, 7706, 7124, 330, 331, 3383, 8740, 3929, 8837, 8737, 5328, 8600, 5588, 6885, 7132, 55367, 7412, 929, 472, 7128, 4791, 4790, 4792, 1457, 115650, 4049, 8517, 1459, 5970, 10673, 7329, 27040, 7189, 7188, 7187, 7186, 6850, 4050, 23118, 1460, 3654, 7185, 8717, 4055, 23586, 959, 958, 695, 597, 596, 29760, 598, 329, 5335, 5336, 10454, 3932, 4067, 23085	1.4917325458000512	0.01248484676084849	0.05724161590464627
hsa05145:Toxoplasmosis	841, 240, 6774, 1147, 284217, 6772, 7124, 330, 7297, 331, 5601, 3305, 5602, 5600, 3306, 5606, 4843, 5170, 6885, 5608, 3716, 207, 836, 208, 3717, 7132, 1234, 3688, 3914, 3915, 5595, 3912, 3310, 4790, 3586, 4793, 3587, 4792, 5594, 8517, 5599, 1432, 5970, 3312, 8651, 3460, 7189, 2770, 2771, 7040, 3458, 3459, 23118, 3654, 7043, 3113, 959, 958, 3115, 596, 8503, 598, 329, 2773, 10319, 2775, 5290, 5291,…	1.4180803125144184	0.013890159261767843	0.06372800979681514
hsa05120:Epithelial cell signaling in Helicobacter pylori infection	3725, 9550, 8517, 5599, 1147, 5781, 1432, 1956, 5970, 51606, 90423, 6352, 535, 533, 245972, 537, 245973, 102, 4233, 7082, 5601, 1445, 5602, 6714, 5600, 10312, 150084, 5058, 28964, 9296, 51382, 836, 23545, 523, 5335, 9114, 5336, 529, 1839, 4790, 526, 4792, 5879, 525, 4067, 528, 998, 527	1.5577718059859882	0.014453786231648724	0.06633197898514576
hsa05162:Measles	6774, 1147, 6772, 6773, 940, 4599, 7297, 9451, 25898, 7161, 3305, 3306, 5588, 6885, 3552, 10379, 3716, 207, 3718, 208, 3717, 6504, 7128, 6777, 6776, 4790, 3310, 4793, 4792, 1457, 3661, 64135, 1459, 5970, 2932, 3312, 1027, 3460, 5610, 7189, 3458, 3459, 27113, 8795, 3455, 23118, 1460, 103, 3654, 23586, 595, 57506, 8503, 1017, 915, 1965, 916, 1019, 917, 8667, 7157, 29110, 5290, 5291, 4478, 355, 1021…	1.4069581139848935	0.0160915424862631	0.0739065227549962
hsa04662:B cell receptor signaling pathway	3725, 3265, 8517, 1147, 5894, 5970, 2932, 3845, 5534, 6850, 5777, 3636, 3635, 695, 5880, 29760, 8503, 930, 5604, 933, 973, 5532, 207, 975, 208, 974, 5290, 5291, 4893, 7410, 2885, 5336, 25780, 5595, 4773, 4772, 2353, 4790, 5294, 4793, 5295, 10451, 4067, 5879, 4792, 6654, 5296, 5594, 4794	1.544131895849033	0.016924420094983184	0.07776315864822525
hsa04914:Progesterone-mediated oocyte maturation	8881, 115, 112, 5894, 245711, 3479, 983, 3480, 64682, 51529, 5601, 5602, 5600, 5604, 207, 208, 6197, 51434, 5595, 29882, 4085, 29945, 5594, 6195, 5140, 5599, 8697, 1432, 3845, 2770, 8900, 2771, 51343, 3320, 369, 5347, 8379, 5241, 8503, 890, 699, 9088, 1017, 5566, 2773, 3326, 5290, 996, 5291, 994, 9133, 995, 10459, 993, 891, 5294, 5295, 5296	1.4837012838386152	0.018571377653456955	0.085398576951079
hsa04664:Fc epsilon RI signaling pathway	1437, 3265, 5599, 5579, 5894, 1432, 5578, 7124, 3845, 27040, 6850, 2207, 2206, 3635, 5601, 695, 283748, 5602, 5880, 8503, 5600, 5321, 5606, 5604, 5609, 5170, 5608, 207, 208, 5290, 5291, 4893, 7410, 5335, 5336, 2885, 5595, 2534, 5294, 5879, 4067, 10451, 5295, 6654, 5296, 5594	1.5628426777502653	0.019026664778538205	0.08751147970968987
hsa04210:Apoptosis	843, 824, 841, 8517, 840, 823, 1147, 3563, 5970, 7124, 330, 331, 7186, 8772, 8837, 8795, 8737, 8717, 596, 8503, 637, 598, 329, 581, 207, 7157, 836, 208, 7132, 5290, 5291, 355, 1676, 356, 472, 2021, 4790, 5294, 4792, 4914, 5295, 9131, 5296	1.5583126989741776	0.038720695702058605	0.1798154965619192
hsa03420:Nucleotide excision repair	4331, 56655, 2072, 54107, 2071, 2074, 404672, 5984, 1069, 5985, 5887, 6117, 1643, 9978, 6119, 5886, 5111, 6118, 1642, 5427, 2067, 5424, 5426, 5981, 5983, 5982, 7508, 2966, 2965, 1022, 8451, 8450, 902, 2967	1.6428723027944818	0.04936360438241516	0.23045180157009737
hsa04722:Neurotrophin signaling pathway	3725, 5781, 5894, 6464, 801, 387, 7161, 5580, 4217, 5601, 5602, 9500, 5600, 4214, 9252, 581, 5604, 5609, 5170, 25, 207, 208, 6197, 4893, 2885, 25970, 5595, 5598, 4790, 4793, 5879, 4792, 6654, 6195, 5594, 4794, 3265, 5599, 11108, 27018, 1432, 5970, 5664, 2932, 3845, 5663, 7189, 4804, 3654, 596, 8503, 5908, 816, 2309, 818, 6272, 7157, 810, 1398, 5290, 5291, 1399, 5335, 356, 5336, 468, 396, 3667, 41…	1.3771135479306684	0.04963338166030329	0.23174235353317085
hsa04071:Sphingolipid signaling pathway	5330, 5579, 5894, 5578, 7124, 55844, 253782, 387, 2207, 2206, 5582, 10715, 29956, 5581, 4217, 53637, 6093, 5601, 5602, 5880, 4846, 5600, 637, 581, 5604, 1901, 5170, 207, 208, 7132, 6609, 5590, 4893, 5595, 4790, 5879, 5594, 3265, 5599, 1432, 5970, 2768, 10672, 3845, 56848, 5521, 2770, 2771, 7186, 5516, 5515, 5518, 5519, 1509, 8717, 9475, 5728, 596, 8503, 2776, 2773, 7157, 5525, 427, 5290, 5291, 55…	1.3704137473878832	0.06810613243116626	0.3209540232164798
hsa05164:Influenza A	3725, 5894, 5579, 6772, 5578, 6773, 7706, 7124, 4599, 6347, 3337, 7297, 5371, 10482, 9451, 3383, 6352, 4928, 1387, 1386, 5601, 3305, 5602, 5600, 3306, 5606, 5604, 5609, 5646, 5644, 10379, 3552, 5608, 3716, 834, 207, 208, 3717, 7132, 56649, 10625, 5595, 71, 3310, 4790, 4793, 4792, 5594, 64135, 3661, 5599, 1432, 7514, 2033, 5970, 2932, 7416, 3312, 3460, 5611, 5610, 11100, 3458, 3459, 8795, 29108, 3…	1.3186622088843756	0.07477887119942705	0.35359458951916833
hsa05221:Acute myeloid leukemia	861, 8517, 3265, 1147, 6774, 7704, 5894, 862, 5970, 3845, 5914, 5371, 3728, 2475, 1050, 369, 51176, 595, 8503, 5604, 6688, 3815, 207, 208, 5290, 5291, 6198, 4893, 6199, 2885, 5595, 6777, 6776, 4790, 5294, 5295, 4609, 6654, 5296, 5594	1.5531355803729345	0.07786938276217781	0.36878842573592197
hsa04510:Focal adhesion	1292, 3725, 1291, 284217, 2002, 63923, 2335, 330, 3479, 331, 1311, 10298, 3480, 3676, 3674, 3679, 1289, 5159, 6093, 1280, 5747, 1284, 5170, 7408, 3691, 2324, 207, 3693, 208, 3695, 3685, 3688, 10627, 7410, 6696, 3914, 3915, 3912, 1278, 83660, 824, 2318, 56034, 7414, 2316, 2317, 4638, 7423, 5829, 4233, 595, 5154, 596, 5155, 5156, 329, 9564, 5058, 1301, 10319, 1398, 1399, 7059, 894, 998, 88, 7057, 8…	1.272813548793429	0.07804460827772275	0.36965133958503094
hsa04062:Chemokine signaling pathway	10344, 6774, 6772, 6773, 6349, 59345, 6347, 157, 156, 6352, 6356, 6354, 6093, 5747, 9547, 207, 208, 3718, 3717, 1794, 6362, 409, 6361, 408, 6364, 4893, 7410, 6367, 7074, 6777, 4790, 4793, 4792, 5970, 2788, 3845, 2787, 2268, 2783, 2770, 2790, 2771, 6374, 6373, 6372, 6370, 5829, 2833, 2309, 5566, 9564, 10681, 5058, 2773, 1398, 2782, 1399, 2185, 998, 5330, 115, 1147, 112, 5894, 6464, 387, 7852, 5647…	1.2902972513867457	0.08082077188493852	0.3833437333605971
hsa05211:Renal cell carcinoma	3725, 3265, 5063, 5781, 5894, 2033, 3845, 5062, 6513, 10298, 2271, 7040, 369, 1387, 9978, 6921, 4233, 6923, 7043, 8503, 5908, 5155, 54583, 5604, 3091, 7428, 5058, 207, 9915, 208, 1398, 5290, 5291, 1399, 4893, 2885, 8453, 5595, 5294, 5879, 5295, 998, 6654, 5296, 5594	1.5053467932845366	0.08794042794354417	0.41864001554895447
hsa04350:TGF-beta signaling pathway	7027, 7124, 3625, 3624, 387, 1387, 6093, 3397, 3398, 6198, 6199, 8454, 4088, 5595, 5933, 4089, 4086, 4609, 4087, 5594, 57154, 2033, 6500, 8646, 25805, 7040, 3458, 1030, 5516, 5515, 5518, 4090, 3399, 5519, 10468, 9978, 5308, 7048, 268, 4052, 7046, 4093, 4091, 7043, 657, 658, 93, 92, 91, 90, 650, 655, 7050, 83729, 7057	1.4408607191411562	0.09151323077860518	0.4364516926390949
hsa04114:Oocyte meiosis	8881, 115, 112, 801, 245711, 3479, 9700, 5534, 983, 9748, 3480, 64682, 51529, 5604, 27127, 6197, 8454, 5501, 5499, 5500, 51434, 5595, 29882, 4085, 29945, 6195, 5594, 8243, 10971, 8697, 9985, 3708, 3709, 8945, 6790, 6500, 23291, 5516, 5515, 9126, 5518, 5347, 5519, 9978, 5241, 7529, 699, 816, 818, 9088, 1017, 5566, 5532, 151648, 9232, 810, 5525, 996, 995, 5529, 5528, 10459, 991, 7534, 7533, 7532, 7…	1.3818552079579753	0.09795429784820253	0.46873224976465844
hsa05110:Vibrio cholerae infection	9550, 115, 9601, 5579, 6558, 5578, 10952, 51606, 9414, 90423, 11015, 535, 533, 245972, 537, 245973, 60, 5582, 7082, 1080, 10312, 5566, 2778, 51382, 9296, 30001, 23545, 523, 3784, 9114, 5335, 5336, 529, 71, 526, 525, 528, 527	1.5589964693554739	0.10192733869889381	0.4887537334730574
hsa05012:Parkinson's disease	1351, 1350, 29796, 9246, 374291, 539, 1347, 1345, 51465, 506, 1329, 509, 5071, 7314, 836, 7381, 7345, 10476, 4695, 1337, 7386, 7385, 7384, 54539, 4709, 4707, 4705, 4706, 7327, 7326, 4704, 7416, 4701, 7417, 4702, 10975, 27429, 4700, 4731, 27089, 2770, 2771, 125965, 7332, 9167, 126328, 516, 515, 514, 9377, 4728, 6622, 4729, 4719, 4724, 4712, 7318, 5566, 4723, 293, 7317, 4726, 4714, 4725, 4715, 4720…	1.3460508363232098	0.11030752234529562	0.5312629767254995
hsa04144:Endocytosis	10890, 2149, 55040, 5371, 157, 156, 154, 10617, 22905, 3480, 3482, 58533, 9146, 89853, 4218, 112936, 4193, 8027, 25978, 51160, 7879, 8394, 27128, 80223, 273, 93343, 409, 8729, 408, 163, 8724, 160, 8723, 57154, 829, 51699, 27183, 3312, 1785, 51028, 11031, 84612, 8766, 7189, 10015, 7040, 58513, 3798, 23327, 7048, 51510, 23325, 7046, 4233, 3799, 7043, 55737, 9230, 26056, 116987, 5156, 26052, 55738, …	1.2315879797488503	0.13158831015835615	0.6409534915090664
hsa05213:Endometrial cancer	3265, 5894, 1956, 2002, 2932, 3845, 1496, 1499, 10297, 369, 51176, 595, 5728, 8503, 4292, 2309, 5604, 324, 5170, 3611, 207, 7157, 208, 5290, 5291, 4893, 2885, 8313, 5595, 5294, 5295, 1495, 4609, 6654, 5296, 5594, 999	1.5471619819868845	0.1530874920581321	0.754406376567951
hsa03050:Proteasome	5717, 5718, 5719, 5682, 5710, 9861, 5686, 5713, 5685, 5714, 5684, 5683, 9491, 3458, 10197, 5708, 5709, 5707, 5704, 5705, 10213, 5720, 5702, 5693, 5721, 5692, 5700, 5695, 5701, 5687, 5688, 5689	1.581374409106988	0.22193265416270758	1.1371567838418306
hsa05216:Thyroid cancer	7849, 595, 3265, 10342, 8031, 5604, 6257, 6258, 3845, 6256, 5468, 7157, 1499, 5979, 4893, 7175, 51176, 5595, 4914, 7170, 4609, 999, 5594	1.7245160582071892	0.2576476345174229	1.3486481818587248
hsa05130:Pathogenic Escherichia coli infection	7846, 347733, 5578, 1499, 10382, 10383, 347688, 10381, 387, 7277, 8440, 84790, 60, 9475, 6093, 81027, 7280, 8976, 3059, 25, 10376, 7430, 929, 9181, 3688, 10552, 84617, 203068, 2534, 71, 4691, 998, 4690, 999, 112714	1.5220728687654759	0.3214608002042346	1.7519341923511789
hsa05140:Leishmaniasis	3725, 1432, 2002, 6772, 5970, 7124, 3460, 3684, 7189, 3676, 7040, 3458, 3459, 2209, 23118, 3654, 5777, 7043, 3113, 3115, 5600, 4688, 4843, 6885, 3552, 3716, 3717, 3688, 718, 653361, 3689, 5595, 10454, 2215, 4790, 2353, 2212, 3586, 4793, 1535, 4792, 2214, 3123, 5594, 3122	1.4389344347572777	0.3280377774762011	1.7955375648991412
hsa04530:Tight junction	10207, 4301, 50855, 8531, 5579, 5578, 9071, 8573, 55844, 57530, 9075, 9863, 9074, 10398, 9414, 9076, 27134, 8735, 387, 8777, 79784, 81, 5582, 87, 5580, 5581, 22989, 5588, 207, 208, 10627, 5590, 4893, 71, 11336, 1495, 1457, 3996, 3993, 1459, 3265, 3845, 1496, 84612, 5521, 9223, 1499, 2770, 2771, 6237, 5516, 9218, 5515, 5518, 1366, 5519, 1460, 60412, 5865, 60, 7082, 8189, 5728, 6714, 3059, 150084, …	1.2981431716549903	0.3646059826344077	2.0456632535038266
hsa03440:Homologous recombination	8438, 7517, 5890, 4361, 675, 5424, 5893, 4683, 5892, 80198, 7516, 7156, 25788, 641, 146956, 6117, 5888, 6119, 10111, 6118, 6742, 5889	1.708449138410228	0.3934948672379952	2.2531755202830794
hsa04930:Type II diabetes mellitus	5599, 7124, 389692, 8651, 2475, 9021, 5580, 5581, 5601, 3099, 773, 3101, 3098, 5602, 8503, 776, 777, 3651, 774, 775, 80201, 122809, 5290, 5291, 5590, 3667, 5595, 3643, 5315, 5294, 5295, 5296, 5594	1.5266992300687143	0.4045496065699782	2.335088120083495
hsa04115:p53 signaling pathway	841, 11200, 2810, 7249, 1029, 3479, 1026, 983, 25898, 27113, 50484, 51512, 1643, 7161, 5268, 6477, 56475, 595, 5728, 3732, 637, 4194, 581, 1017, 1111, 4193, 1019, 7157, 836, 5054, 55367, 355, 64326, 1021, 55240, 9133, 545, 472, 894, 891, 900, 898, 7057, 896	1.4279574888204891	0.43521939338183935	2.570181579099884
hsa04310:Wnt signaling pathway	3725, 5330, 4041, 4040, 5579, 5578, 6422, 11197, 5534, 10297, 387, 51176, 1387, 8326, 5582, 1488, 5601, 1487, 5602, 89780, 5880, 1857, 1856, 23500, 4316, 79718, 22943, 6885, 1855, 50964, 7481, 7480, 8454, 54361, 80326, 8313, 4089, 5879, 4609, 1457, 1459, 5599, 4776, 1452, 2033, 1454, 2932, 7477, 5663, 8945, 7472, 7473, 7475, 1499, 6500, 25805, 23291, 6907, 1460, 9978, 6477, 9475, 595, 51701, 816,…	1.2885272963093974	0.4552358266623522	2.730277971376871
hsa04650:Natural killer cell mediated cytotoxicity	5781, 3824, 5579, 5894, 6464, 5578, 3384, 7124, 3683, 3383, 5534, 2207, 5582, 5777, 5880, 637, 5604, 836, 5551, 7410, 4893, 2885, 3689, 5595, 2215, 5879, 2214, 6654, 5594, 1437, 3265, 3845, 962, 27040, 3460, 80329, 80328, 3458, 3459, 6850, 369, 8795, 919, 3455, 8503, 5058, 5532, 5290, 5291, 355, 5335, 356, 5336, 2534, 4773, 2185, 4772, 5294, 3932, 10451, 5295, 5296	1.334773944320502	0.49423380621764745	3.059003647592895
hsa04931:Insulin resistance	6774, 5781, 10891, 7124, 148327, 6513, 2475, 10488, 2673, 10062, 5580, 57761, 5581, 5601, 5602, 4846, 5588, 5170, 1385, 207, 208, 7132, 133522, 6197, 6198, 5590, 6199, 5834, 9586, 11001, 5501, 5500, 5499, 5836, 10724, 3643, 4790, 4792, 6195, 5599, 9945, 5105, 5970, 2932, 5465, 5565, 5564, 5563, 5562, 7376, 9021, 5728, 8503, 2308, 5290, 5524, 5291, 5571, 8473, 3667, 6720, 5770, 5294, 5295, 5296	1.320891007606888	0.5295069149075565	3.3778765457695092
hsa04622:RIG-I-like receptor signaling pathway	843, 3661, 64135, 841, 8517, 5599, 1147, 1432, 5970, 7706, 7124, 338376, 7189, 7187, 7186, 8772, 10010, 8737, 1540, 8717, 23586, 5601, 5602, 5300, 9636, 5600, 57506, 4214, 6885, 26007, 29110, 1654, 4790, 4793, 4792, 3665, 54941	1.4627713284239636	0.5483674659368761	3.5578690190968265
hsa04915:Estrogen signaling pathway	3725, 5330, 115, 112, 5894, 6464, 801, 148327, 2099, 2289, 2288, 1388, 10488, 1386, 5580, 3305, 4313, 3306, 4846, 4318, 5604, 1385, 207, 208, 4893, 2885, 9586, 5595, 3310, 6654, 5594, 3265, 3708, 1956, 3709, 3845, 3312, 2770, 2771, 3320, 6714, 2550, 8503, 5566, 2776, 2100, 2778, 2773, 3326, 9568, 2775, 810, 5290, 5291, 468, 1839, 2353, 5294, 5295, 5296	1.3312590688910864	0.5874722764365217	3.955116503761935
hsa04917:Prolactin signaling pathway	3265, 5599, 6774, 1432, 5894, 6464, 6772, 5970, 2932, 3845, 8651, 2099, 3659, 9021, 9655, 8600, 595, 5601, 5602, 6714, 8503, 5600, 2309, 5604, 2100, 122809, 207, 208, 3717, 5290, 5291, 4893, 2885, 5595, 6777, 6776, 894, 4790, 2353, 5294, 5295, 2001, 6654, 5296, 5594	1.3978220223356412	0.6037252017501775	4.1309014756224505
hsa04540:Gap junction	5330, 2915, 115, 112, 5579, 5894, 7846, 5578, 983, 10382, 10383, 10381, 5582, 5159, 7280, 5604, 1902, 10376, 4893, 2885, 5595, 5598, 5592, 6654, 5594, 3265, 1453, 347733, 3708, 1956, 3709, 56034, 2767, 3845, 2697, 2770, 2771, 3358, 347688, 7277, 84790, 7082, 6714, 81027, 5154, 5155, 5156, 5566, 2776, 2778, 2773, 84617, 203068, 112714	1.3496212629447568	0.6295326315146836	4.424686451333104
hsa04670:Leukocyte transendothelial migration	4301, 5781, 5579, 5578, 9071, 3683, 9075, 3684, 9074, 10398, 3383, 9076, 3676, 387, 7852, 81, 5582, 87, 27035, 6093, 4313, 5747, 5880, 5600, 4318, 4688, 7408, 7412, 3688, 7070, 7410, 10627, 3689, 2909, 71, 1495, 5879, 1432, 7414, 1496, 3702, 1499, 2770, 2771, 1366, 60, 5829, 9475, 8503, 5908, 9564, 2773, 5290, 7430, 5291, 4478, 653361, 5335, 5336, 11069, 2185, 1535, 5294, 10451, 5295, 998, 88, 52…	1.297004449574591	0.6710268707282793	4.940717339563639
hsa04145:Phagosome	9550, 7846, 11151, 4353, 10952, 949, 1311, 3684, 10382, 10383, 10381, 535, 2209, 533, 1520, 3106, 537, 3920, 3105, 9146, 4074, 27035, 7280, 4688, 7037, 9296, 8685, 3693, 23545, 10376, 7879, 1514, 4973, 3685, 929, 3688, 9114, 3689, 3916, 2215, 71, 2212, 5878, 5879, 2214, 23673, 6441, 81035, 347733, 6890, 821, 51606, 90423, 347688, 7277, 53407, 245972, 84790, 245973, 60, 3113, 811, 3115, 81027, 367…	1.2550169387711498	0.6831849774917502	5.10372455774487
hsa05016:Huntington's disease	5436, 5437, 5434, 29796, 10891, 6874, 4899, 374291, 1387, 10488, 539, 1329, 1385, 163, 10476, 160, 4695, 54539, 7416, 7417, 27089, 27113, 9167, 516, 515, 514, 9377, 2776, 293, 146754, 292, 498, 522, 6389, 1639, 5430, 5433, 5432, 1351, 5330, 2915, 1350, 841, 148327, 9001, 1347, 1345, 2902, 506, 2904, 6647, 509, 581, 836, 7381, 9586, 1337, 7386, 7385, 7384, 4709, 25942, 4707, 1742, 4705, 2033, 3708…	1.2253467451782045	0.7314527968193153	5.81590873515585
hsa05152:Tuberculosis	843, 841, 11151, 5894, 4046, 6772, 801, 7124, 5993, 3684, 5534, 1051, 8772, 3929, 1054, 535, 387, 533, 1387, 2209, 1520, 2207, 3920, 537, 5601, 5602, 51561, 5600, 637, 4843, 581, 23365, 8625, 3552, 1385, 3716, 207, 836, 23545, 208, 7879, 3717, 7132, 929, 9114, 3689, 3916, 5595, 2215, 4790, 3586, 5878, 2212, 3587, 2214, 5594, 64170, 5599, 1432, 2033, 5970, 3313, 56848, 3460, 51606, 7189, 3458, 704…	1.2348386589631726	0.788176447404399	6.828904628750632
hsa04151:PI3K-Akt signaling pathway	1292, 1291, 2149, 284217, 63923, 2335, 55844, 3479, 59345, 1311, 3676, 3480, 3674, 1388, 1975, 3679, 10488, 1386, 1977, 1289, 5159, 1280, 5747, 1284, 930, 672, 11140, 5170, 4193, 1902, 1385, 3691, 2324, 3716, 207, 3693, 208, 3718, 8115, 3717, 3695, 4602, 3685, 64223, 3688, 4893, 6696, 3914, 3915, 5934, 4790, 1278, 3912, 4609, 5970, 56034, 2788, 3845, 2787, 2783, 2790, 3320, 5563, 5562, 7423, 1011…	1.158765730811155	0.8240930979375736	7.614527721836561
hsa04910:Insulin signaling pathway	10891, 5894, 6464, 2002, 801, 5577, 7249, 10580, 2475, 2194, 1977, 2203, 3636, 5601, 3099, 5602, 3098, 3101, 5604, 5170, 23265, 207, 208, 6198, 5590, 6199, 4893, 2885, 5834, 5501, 31, 5500, 5499, 5836, 5595, 3643, 6654, 6194, 5594, 5140, 3265, 5599, 5257, 5105, 2319, 2932, 3845, 868, 867, 8651, 9470, 5565, 369, 5564, 5563, 5562, 9021, 8503, 2308, 5566, 80201, 122809, 23624, 10211, 810, 1398, 5290…	1.247076510122974	0.8921111279595395	9.650073554344363
hsa00310:Lysine degradation	79723, 79823, 219, 217, 5352, 39, 5351, 10919, 38, 387893, 6419, 3030, 51111, 6839, 55870, 23067, 84444, 7468, 1962, 55753, 2639, 9739, 80854, 84787, 54904, 4297, 79813, 8085, 9869, 58508, 29072, 8985, 64324, 23127	1.4217164158798399	0.908466042589537	10.324461146499587
hsa04010:MAPK signaling pathway	4208, 3725, 2005, 2002, 5534, 3925, 1386, 5159, 4217, 9252, 4214, 4216, 4296, 3552, 6885, 207, 208, 409, 1616, 408, 929, 4893, 25780, 4791, 4790, 4609, 1432, 2318, 5970, 2768, 2316, 3845, 2317, 3312, 3315, 7189, 7040, 7186, 8649, 1649, 51295, 23118, 1849, 7048, 7046, 1848, 7043, 57551, 5154, 51701, 5155, 4763, 5156, 5566, 5058, 1398, 994, 1399, 4772, 998, 6722, 784, 1147, 785, 5579, 5894, 5578, 7…	1.1755847360383755	0.9101832405892509	10.40182861647625
hsa05323:Rheumatoid arthritis	3725, 9550, 941, 942, 940, 7124, 6349, 6347, 3683, 3383, 6352, 535, 533, 537, 8600, 4314, 51561, 4312, 3552, 9296, 23545, 1514, 1513, 6364, 9114, 3689, 1493, 1437, 10673, 51606, 90423, 7040, 3458, 4050, 6374, 6372, 245972, 245973, 7043, 3113, 3115, 10312, 51382, 523, 529, 2353, 526, 525, 528, 3123, 527, 3122	1.31474732850174	0.9177274299807345	10.759369737321311
hsa04150:mTOR signaling pathway	5579, 10325, 5578, 7249, 25989, 7124, 3479, 6794, 2475, 9470, 5563, 1975, 5562, 1977, 5582, 64121, 5728, 8503, 5170, 207, 208, 5290, 5291, 6197, 64223, 6198, 6199, 51719, 5595, 3667, 5294, 5295, 6194, 5296, 5594, 6195	1.397822022335641	0.9325847290871334	11.565743587444599
hsa05100:Bacterial invasion of epithelial cells	6464, 7414, 868, 2335, 4735, 867, 1785, 1496, 1499, 387, 79767, 60, 4233, 5829, 5747, 6714, 8503, 8976, 3059, 26052, 8936, 9564, 857, 55752, 3611, 1759, 23624, 1398, 5290, 5291, 3688, 10552, 1399, 1211, 9844, 10459, 1212, 1213, 23607, 71, 5294, 5879, 5295, 1495, 998, 5296, 999	1.3272249505005078	0.9487634463724954	12.664872061439624
hsa04621:NOD-like receptor signaling pathway	7205, 841, 64170, 8517, 5599, 1147, 1432, 5970, 7124, 6347, 330, 7189, 6352, 3320, 22900, 29108, 23118, 58484, 5601, 5602, 5600, 55914, 4671, 329, 6885, 3326, 834, 7128, 10454, 5595, 4790, 4793, 4792, 5594	1.3690602523287347	0.9945989499536163	21.176186594250236
hsa04152:AMPK signaling pathway	10890, 10891, 1938, 7249, 55844, 3479, 148327, 2475, 3480, 2194, 10488, 3156, 2203, 4218, 1080, 5170, 6885, 1385, 51094, 207, 208, 29904, 6198, 6199, 9586, 31, 51719, 3643, 5214, 23411, 5105, 6794, 51552, 5211, 5521, 8900, 5516, 5565, 5515, 5209, 5564, 5518, 5208, 5563, 1994, 5562, 5519, 595, 9230, 5862, 8503, 890, 2308, 2309, 5468, 5525, 5290, 5291, 5571, 5522, 5529, 5528, 3667, 6720, 5294, 5295…	1.2321542270958614	0.9952901974054038	21.666624863185312
hsa03430:Mismatch repair	5424, 4292, 4436, 5981, 5983, 5982, 4437, 5395, 5984, 5985, 6117, 2956, 6119, 6118, 5111, 6742, 9156	1.607157687516341	0.9965033910733362	22.722788666223437
hsa00051:Fructose and mannose metabolism	3099, 4351, 3098, 3101, 226, 230, 5373, 5372, 80201, 2762, 5211, 7167, 5209, 5208, 231, 57016, 3795, 5214, 6652, 2203, 29926, 29925	1.4948929961089492	0.9969840767379073	23.241885325260537
hsa04370:VEGF signaling pathway	3265, 5579, 1432, 5894, 5578, 3845, 56848, 3315, 5534, 9047, 5582, 5829, 283748, 5880, 5747, 6714, 5600, 8503, 4846, 5321, 5604, 5532, 207, 208, 5290, 5291, 4893, 5335, 5336, 5595, 4773, 5294, 5879, 5295, 5296, 998, 5594	1.3408737177219667	0.9970619984037505	23.333402515913825
hsa04721:Synaptic vesicle cycle	9550, 22999, 6804, 6809, 6844, 1785, 51606, 90423, 535, 8775, 533, 245972, 245973, 1175, 4905, 1173, 5864, 773, 10312, 26052, 774, 51382, 9296, 1759, 23545, 6857, 163, 523, 9114, 1211, 1212, 1213, 160, 529, 526, 525, 528, 527	1.3326905302554857	0.9975546327809252	23.97201311952195
hsa05218:Melanoma	3265, 1869, 5894, 1956, 56034, 3845, 1029, 3479, 1026, 3480, 2246, 369, 4233, 5159, 595, 5728, 8503, 5154, 5155, 5156, 5604, 4193, 1019, 5925, 207, 7157, 1871, 208, 1870, 2260, 5290, 5291, 1021, 4893, 5595, 5294, 9965, 5295, 5296, 5594, 999	1.3110291516677417	0.9985103228620584	25.6701322170341
hsa04920:Adipocytokine signaling pathway	23205, 8517, 5599, 1147, 6774, 5781, 10891, 5105, 5970, 7124, 6794, 6513, 2475, 5465, 7186, 5565, 5564, 5563, 5562, 9021, 8717, 5601, 5602, 5588, 6257, 6258, 6256, 51094, 7133, 207, 208, 3717, 7132, 2180, 5571, 3667, 4790, 4793, 4792, 2181, 4794, 2182	1.304633887513265	0.998714992171758	26.169117613233674
hsa03030:DNA replication	5427, 4173, 4175, 4174, 4176, 5424, 56655, 5426, 54107, 5981, 5983, 5982, 4171, 2237, 5984, 5985, 5422, 6117, 6119, 6118, 5111, 246243, 6742, 84153	1.4495932083480723	0.9988731037886414	26.609595472080017
hsa04966:Collecting duct acid secretion	9550, 10312, 760, 9296, 51382, 23545, 90423, 6521, 523, 9114, 535, 245972, 529, 10723, 245973, 526, 525, 528, 527	1.5301261643674096	0.9992523865032465	27.96932452255192
hsa04666:Fc gamma R-mediated phagocytosis	5894, 5579, 5578, 2209, 3636, 5582, 5580, 3635, 3055, 5581, 5880, 8976, 5604, 8936, 7408, 207, 8394, 208, 273, 1794, 6198, 7410, 6199, 5595, 2212, 5879, 5788, 5594, 2934, 56848, 27040, 3984, 6850, 8503, 5058, 5290, 1398, 5291, 1399, 10552, 653361, 5335, 5336, 5294, 5295, 10451, 4067, 5296, 998	1.268394057304563	0.999434017957724	28.87723706270967
hsa04620:Toll-like receptor signaling pathway	3725, 841, 1147, 941, 942, 6772, 6349, 7124, 6352, 3929, 8772, 8737, 5601, 5602, 5600, 5606, 5604, 5609, 6885, 5608, 207, 208, 929, 1513, 6696, 5595, 4790, 5879, 4792, 5594, 3661, 8517, 5599, 1432, 5970, 7189, 7187, 54472, 6373, 3455, 23118, 3654, 958, 8503, 29110, 5290, 5291, 10454, 2353, 5294, 5295, 3665, 5296	1.2526376093877363	0.9995906726125992	29.919894030182213
hsa04730:Long-term depression	5330, 3265, 5579, 5894, 5578, 3708, 3709, 2768, 10672, 2767, 3845, 3479, 1394, 2770, 3480, 2771, 5516, 5515, 369, 5518, 5519, 5582, 773, 283748, 5321, 5604, 2776, 2778, 2773, 2775, 2781, 4893, 5595, 5592, 4067, 5594	1.3267463262846761	0.9996149024085185	30.1145108349541
hsa05132:Salmonella infection	3725, 1437, 5599, 1432, 2318, 5970, 6349, 2316, 2317, 147700, 3460, 3458, 3929, 3459, 29108, 58484, 5585, 60, 7082, 9475, 6093, 5601, 5602, 5600, 8976, 4843, 8936, 3552, 834, 1778, 3831, 7879, 929, 10552, 1781, 1780, 5595, 71, 4790, 2353, 64837, 5879, 998, 5216, 89953, 5594, 5217	1.261682977636285	0.9999260525027694	35.17750723900506
hsa05416:Viral myocarditis	841, 941, 942, 940, 8672, 3683, 1605, 3383, 1525, 3106, 60, 3105, 1756, 959, 595, 3113, 958, 5880, 3115, 637, 25, 857, 27, 836, 1982, 5551, 1981, 3689, 2534, 71, 5879, 3123, 3122	1.3046338875132648	0.9999988678431846	46.419577856916916
hsa04015:Rap1 signaling pathway	4301, 2149, 801, 3479, 3683, 3684, 9863, 3480, 3674, 5159, 57568, 1902, 7408, 2324, 207, 208, 3688, 4893, 25780, 3689, 7074, 5216, 83660, 5217, 1432, 56034, 3845, 84612, 9223, 2770, 2771, 7423, 4804, 4233, 5154, 5899, 5155, 5898, 5156, 2776, 260425, 9564, 2778, 2773, 2775, 810, 1398, 1399, 5335, 7057, 998, 999, 5330, 50855, 115, 112, 5894, 5579, 5578, 2246, 387, 5582, 9693, 2902, 1944, 2903, 5880…	1.1399713580212996	0.999999203626268	47.27182679252081
hsa05131:Shigellosis	8517, 5599, 1147, 1432, 5970, 7414, 8945, 960, 23291, 79767, 60, 9475, 5601, 6093, 5602, 6714, 5600, 3059, 8976, 8936, 25, 1398, 3688, 10552, 1399, 10459, 9844, 5595, 71, 4790, 4793, 4792, 5879, 5216, 998, 5594, 5217	1.2770225883066348	0.9999995148660226	48.44955198487546
hsa04960:Aldosterone-regulated sodium reabsorption	2810, 8503, 5579, 5578, 5170, 9351, 3845, 3479, 476, 478, 5290, 6338, 5291, 6337, 3667, 5595, 23327, 6446, 3643, 5582, 5294, 5295, 5296, 5594	1.3732988289613317	0.9999997234578443	49.75330010014356
hsa04912:GnRH signaling pathway	3725, 5330, 3265, 115, 5599, 112, 5894, 1432, 5579, 1956, 5578, 3708, 2002, 801, 3709, 2767, 3845, 5580, 5601, 283748, 5602, 4313, 6714, 5600, 776, 4214, 5606, 816, 5321, 4216, 5604, 818, 775, 5566, 5609, 2776, 778, 2778, 5608, 810, 4893, 2885, 468, 5595, 1839, 2185, 5598, 998, 6654, 5594	1.2215673104056788	0.9999998477371541	51.10145233869142
hsa05133:Pertussis	3725, 3661, 840, 5599, 1432, 801, 5970, 7124, 3684, 7189, 2770, 2771, 387, 6374, 6372, 29108, 722, 3659, 720, 3654, 5601, 5602, 5600, 51561, 4843, 3552, 834, 2773, 836, 810, 929, 3688, 718, 713, 3689, 712, 5595, 4790, 2353, 710, 3586, 5594	1.2341131368368723	0.9999999964044088	58.7756998020097
hsa04330:Notch signaling pathway	151636, 4854, 4853, 3280, 2033, 4851, 5664, 5663, 171558, 22938, 51107, 2648, 3516, 1840, 1387, 113878, 9794, 1488, 9612, 1487, 3714, 1857, 1856, 9253, 8850, 1855, 3065, 23385	1.295381164906788	0.9999999998895728	64.82678368499815
hsa04810:Regulation of actin cytoskeleton	10152, 2147, 2149, 55845, 2335, 3683, 3684, 55740, 3681, 10298, 3676, 3674, 10297, 3679, 5159, 6093, 5747, 6548, 81624, 8874, 8936, 3691, 3693, 8394, 3695, 929, 3685, 3688, 10627, 4893, 7410, 3689, 7074, 5216, 5217, 56034, 2768, 7414, 3845, 10672, 4638, 23191, 5829, 5154, 5155, 5156, 324, 9564, 5058, 1398, 7430, 1399, 88, 998, 5063, 5894, 5062, 10398, 2246, 387, 81, 87, 5880, 8976, 5604, 2263, 23…	1.1191712270334382	0.9999999999889335	68.32771306020615
hsa04611:Platelet activation	5330, 115, 112, 2149, 7450, 5739, 8673, 3674, 387, 2207, 1289, 6093, 1280, 4846, 5600, 10235, 5321, 23365, 7408, 207, 208, 3688, 5590, 10627, 5501, 5500, 5499, 5595, 2909, 71, 1278, 2212, 5592, 83660, 5594, 51206, 1432, 3708, 3709, 10672, 2770, 2771, 6850, 4638, 60, 9475, 695, 283748, 6714, 3673, 8503, 5908, 5566, 2776, 1301, 2778, 2773, 2243, 5290, 5291, 5336, 6915, 7094, 2534, 5294, 4067, 5295,…	1.1551445879023698	0.9999999999950099	69.4567419523977
hsa04710:Circadian rhythm	4862, 6095, 1453, 8553, 79365, 1407, 1454, 8945, 1385, 6097, 6500, 23291, 5571, 5565, 8454, 5564, 5563, 5562, 9978	1.3771135479306684	0.9999999999969617	70.13965515853285
hsa05340:Primary immunodeficiency	959, 695, 958, 115650, 920, 57379, 8517, 29760, 930, 5896, 915, 5993, 916, 8625, 6890, 973, 29851, 7374, 3932, 5788, 100	1.3430054724401257	0.9999999999992323	71.95433282933226

## Sheet: KEGG pathways Losses
Supplementary Table vIf: Enriched KEGG pathways for proteins involved in egdetic losses
KEGG pathway	Genes	Fold Enrichment	Bonferroni	FDR
hsa05200:Pathways in cancer	3725, 6774, 10342, 5731, 6772, 5733, 332, 3082, 2335, 330, 3479, 59345, 5371, 331, 3728, 64399, 3480, 8321, 8322, 8323, 51176, 8326, 2956, 1488, 6093, 1487, 7484, 5747, 5743, 3091, 2322, 25, 3716, 7482, 207, 7480, 208, 3918, 6608, 405, 7175, 3914, 8312, 2846, 8313, 6777, 6776, 3910, 3911, 4790, 3912, 4792, 1495, 7170, 4609, 1436, 22798, 6469, 8030, 8031, 3845, 1438, 7189, 7042, 7188, 7187, 7040, …	1.2237351909958623	1.396057058844491E-8	6.271699826143617E-8
hsa04120:Ubiquitin mediated proteolysis	90293, 55236, 10401, 330, 9246, 331, 5371, 8925, 8924, 64682, 27339, 27338, 63893, 4214, 9354, 672, 3093, 4193, 51619, 51366, 7337, 64326, 54926, 4591, 26259, 10477, 51434, 51433, 134111, 8554, 57154, 10273, 7327, 8945, 7329, 7328, 8651, 6500, 7189, 23291, 7332, 378884, 10277, 7334, 23295, 9978, 23327, 1643, 9021, 6477, 1642, 55070, 9616, 329, 65264, 7318, 7428, 7317, 51588, 389898, 23624, 7319, …	1.3468746493098418	4.539689456573015E-7	2.039427637878788E-6
hsa03040:Spliceosome	9343, 10291, 10992, 27339, 220988, 10713, 11325, 4686, 4116, 23451, 51362, 23450, 22985, 10907, 8683, 10915, 11338, 84991, 55119, 9984, 5356, 55110, 3312, 51690, 10523, 51691, 10084, 27316, 25804, 9775, 10946, 9879, 58517, 55660, 4809, 25766, 57819, 8175, 10285, 10286, 22916, 10594, 10189, 7919, 9416, 988, 83443, 9410, 26121, 22938, 1665, 51729, 3192, 56259, 3190, 29896, 3305, 23020, 3306, 153527…	1.3042586936090226	1.1454742022865005E-4	5.146252973764476E-4
hsa04068:FoxO signaling pathway	9455, 9454, 6774, 9456, 3479, 26260, 23710, 3480, 1387, 51422, 604, 673, 5170, 1901, 4193, 207, 208, 10000, 10912, 472, 5934, 11337, 1432, 1454, 3845, 7042, 7040, 5565, 1647, 5564, 5563, 5347, 5562, 11345, 10110, 7048, 7046, 10018, 10733, 7043, 595, 1263, 51701, 2308, 5897, 5896, 8660, 80854, 5571, 894, 891, 6655, 1147, 5894, 6517, 847, 2911, 3575, 5601, 5602, 5600, 6648, 5605, 5603, 5604, 6502, …	1.3042586936090226	1.1454742022865005E-4	5.146252973764476E-4
hsa05205:Proteoglycans in cancer	10818, 7291, 6774, 2002, 3082, 3339, 2335, 3479, 2099, 288, 3480, 8321, 286, 3481, 8322, 287, 8323, 1975, 8326, 22800, 6093, 2017, 4313, 7484, 5747, 4318, 673, 6548, 3091, 5170, 4193, 3690, 7482, 207, 3693, 208, 7480, 1514, 3685, 3688, 10000, 6608, 7074, 7078, 4609, 1432, 2318, 2316, 3845, 2317, 3316, 7042, 7040, 5962, 4233, 5829, 595, 815, 816, 817, 818, 5566, 5567, 5058, 23624, 51384, 7430, 533…	1.2468476891711142	1.268558646388973E-4	5.699265918979179E-4
hsa04910:Insulin signaling pathway	2645, 10891, 2002, 801, 1977, 1978, 51422, 2203, 3099, 3098, 6009, 673, 5170, 23265, 207, 399694, 208, 10000, 5834, 5837, 32, 5836, 31, 5140, 5257, 5256, 5255, 2319, 3845, 8651, 5565, 51806, 5564, 5563, 5562, 9021, 2308, 5566, 5567, 8660, 23624, 810, 10211, 1398, 1399, 5571, 5573, 5576, 5575, 5770, 6655, 5894, 6464, 5577, 7249, 10580, 6517, 2475, 8569, 8835, 2194, 5260, 5261, 5584, 3636, 2997, 29…	1.2795309168443496	6.333653322985189E-4	0.0028462152317110245
hsa04722:Neurotrophin signaling pathway	3725, 10818, 801, 27330, 7161, 4217, 4214, 9252, 673, 4215, 5170, 25, 207, 399694, 208, 10000, 25970, 4790, 4793, 4792, 4794, 27018, 1432, 5970, 3845, 7189, 51806, 4803, 627, 4804, 596, 814, 815, 816, 817, 818, 6272, 810, 1398, 1399, 5335, 5336, 396, 398, 7531, 998, 6655, 5781, 5894, 6464, 8767, 387, 51135, 5580, 5601, 5602, 9500, 5600, 5605, 5603, 581, 5604, 5609, 2889, 6197, 2885, 5595, 57498, …	1.2909419381787803	9.347683523545092E-4	0.004201264261605164
hsa04141:Protein processing in endoplasmic reticulum	1410, 10130, 22872, 55741, 3337, 55432, 10294, 51009, 10484, 10483, 1388, 7353, 64215, 10134, 4217, 10808, 23645, 51619, 23471, 9871, 5034, 258010, 23640, 10477, 85479, 10525, 824, 29978, 6184, 823, 3998, 29979, 10273, 7327, 80267, 7415, 6400, 23480, 3312, 56886, 5611, 821, 6185, 5610, 6500, 10427, 7186, 10277, 3320, 23193, 1649, 81567, 22926, 9632, 9978, 6748, 55666, 6747, 201595, 4780, 7184, 67…	1.2472278256617153	0.0010527789902519125	0.004731923373368918
hsa05169:Epstein-Barr virus infection	5436, 3725, 5437, 5434, 6774, 5439, 9861, 7297, 51082, 6416, 1387, 8737, 2208, 1386, 2959, 5441, 8021, 3135, 930, 6688, 4193, 6885, 3716, 207, 208, 1380, 3718, 10000, 10623, 10621, 4790, 4793, 4792, 4609, 4794, 1457, 1459, 1432, 7514, 5757, 26993, 5970, 2268, 3312, 5610, 3315, 3316, 7189, 10014, 7188, 7187, 7186, 3516, 23118, 1460, 7185, 23586, 596, 7529, 890, 5566, 10213, 5567, 9759, 7431, 5335,…	1.229083461341526	0.001390416164437136	0.006250509159444473
hsa05220:Chronic myeloid leukemia	6655, 1869, 1147, 5781, 5894, 6464, 1488, 1487, 5605, 673, 2122, 5604, 4193, 5925, 25, 207, 208, 399694, 10000, 2885, 6777, 5595, 6776, 4089, 4790, 4792, 4609, 6654, 5594, 861, 3265, 8517, 5970, 9846, 3845, 868, 1029, 867, 1027, 1026, 7042, 7040, 369, 7048, 7046, 7043, 595, 8503, 598, 1019, 23624, 7157, 1871, 1870, 1398, 5290, 5291, 1021, 1399, 25759, 3065, 613, 5294, 5295, 5296	1.3577868281815648	0.0029901817877391323	0.01345242439392269
hsa04066:HIF-1 signaling pathway	2056, 51378, 6774, 5579, 5578, 5162, 5163, 5160, 3479, 2475, 3480, 8569, 1387, 1977, 7018, 1978, 6921, 6923, 27035, 3099, 3101, 3098, 4846, 5605, 4843, 7037, 5604, 3091, 2321, 207, 208, 6198, 6199, 10000, 405, 8453, 5595, 7076, 3643, 2023, 4790, 112399, 6194, 5594, 1956, 2033, 5970, 1027, 1950, 1026, 3460, 2872, 9470, 3458, 3459, 5209, 2597, 9978, 2027, 2026, 4055, 3570, 596, 8503, 815, 816, 7010…	1.3099442153771528	0.004284162783592893	0.01928581969389276
hsa04144:Endocytosis	10890, 5371, 157, 156, 155, 154, 22905, 10617, 153, 3480, 8218, 89853, 4218, 2321, 8027, 51160, 7879, 80223, 161, 10093, 409, 8729, 10092, 408, 163, 8724, 10095, 160, 8723, 10094, 8411, 1436, 829, 27183, 8766, 7042, 7189, 7040, 23396, 7048, 7046, 4233, 7043, 8853, 55737, 55738, 128866, 9897, 23624, 5337, 5338, 56904, 51534, 7454, 7456, 138429, 3106, 3105, 7251, 830, 832, 84440, 2263, 3815, 2264, …	1.17833856294279	0.008694993878573531	0.03922483470887306
hsa04110:Cell cycle	8317, 8318, 64682, 1387, 4193, 25, 10912, 545, 472, 51434, 5934, 51433, 5933, 4609, 8555, 8243, 8556, 6500, 7042, 7040, 1647, 10274, 5347, 9978, 7043, 10735, 23594, 4173, 595, 8379, 4175, 4174, 7529, 890, 4176, 1111, 4171, 9232, 996, 994, 993, 990, 9184, 991, 7534, 894, 7533, 891, 7532, 7531, 23595, 10744, 896, 2810, 1869, 9700, 983, 10393, 5885, 51529, 5925, 6502, 8454, 4088, 4089, 29882, 4085, …	1.2594555494427124	0.008976877501822744	0.04050195910809684
hsa04390:Hippo signaling pathway	154796, 10207, 55233, 23513, 332, 55844, 64398, 8321, 10297, 8322, 8323, 51176, 8326, 7161, 7484, 7482, 7480, 3689, 8312, 8313, 166824, 1495, 4609, 3996, 3993, 1453, 1454, 8945, 84612, 7042, 23291, 7040, 174, 92597, 7048, 7046, 7043, 10413, 595, 392255, 7529, 324, 5054, 51384, 7534, 4771, 894, 7533, 7532, 7531, 999, 896, 6657, 84962, 8463, 2246, 5584, 122786, 89780, 60485, 1857, 1856, 26524, 3397…	1.2296298177877125	0.014841005361915682	0.06714942836382187
hsa04520:Adherens junction	4301, 10580, 7454, 3480, 387, 51176, 1387, 81, 5777, 6615, 87, 10163, 5880, 5795, 8976, 5792, 8936, 6885, 2260, 8826, 5595, 4088, 4089, 71, 3643, 1495, 5879, 5787, 5594, 4087, 1457, 25945, 1459, 2033, 1956, 7414, 1496, 1499, 1500, 1460, 7048, 81607, 7046, 60, 7082, 4233, 117178, 6714, 51701, 83439, 7525, 10458, 29119, 4008, 2534, 5770, 56288, 5819, 88, 998, 5818, 999	1.3321231650554959	0.01979553775003251	0.08978189370504319
hsa04012:ErbB signaling pathway	3725, 6655, 5063, 5894, 5579, 6464, 3084, 2002, 685, 5578, 5062, 2475, 10298, 6416, 1978, 5601, 2066, 5602, 5747, 2065, 5605, 7039, 673, 5604, 5609, 25, 27, 207, 208, 399694, 6198, 6199, 10000, 2885, 6777, 5595, 6776, 6654, 4609, 4690, 5594, 3265, 5599, 1956, 2932, 3845, 868, 867, 1027, 1950, 1026, 2069, 369, 8440, 57144, 6714, 8503, 815, 816, 817, 818, 5058, 23624, 1398, 5290, 5291, 1399, 2549, …	1.2965603664333245	0.02061717266840357	0.09354570709247945
hsa05211:Renal cell carcinoma	3725, 6655, 5063, 5781, 5894, 3082, 5062, 10298, 1387, 6921, 6923, 5605, 7039, 673, 201163, 5604, 3091, 207, 9915, 208, 2889, 10000, 405, 2885, 8453, 5595, 5879, 112399, 6654, 5594, 3265, 2033, 2034, 3845, 7042, 2271, 7040, 369, 9978, 4233, 7043, 57144, 5906, 8503, 5155, 5908, 54583, 7428, 5058, 1398, 5290, 5291, 1399, 2549, 5294, 5295, 5296, 998	1.3420397146712937	0.023153050999962344	0.10518131564525302
hsa05206:MicroRNAs in cancer	2146, 6774, 63923, 2744, 10298, 7168, 10297, 1387, 3925, 5159, 6093, 4318, 4194, 9252, 5743, 672, 4193, 3690, 25, 399694, 1591, 472, 7078, 4790, 4609, 113130, 3845, 7329, 8651, 1786, 1788, 1789, 7042, 5962, 10018, 4233, 595, 5154, 596, 5155, 5156, 5243, 324, 8660, 4170, 7431, 1398, 7430, 994, 1399, 5335, 5336, 993, 894, 7057, 8434, 6655, 1869, 4854, 4853, 5894, 5579, 6464, 648, 5578, 4851, 2475, …	1.2315444408121754	0.024282264355656058	0.11037187737876764
hsa05161:Hepatitis B	3725, 6774, 6775, 6772, 2002, 332, 3339, 10542, 6416, 1388, 1387, 10488, 1386, 537, 4318, 4214, 1385, 3716, 207, 208, 10000, 6777, 9641, 6776, 6778, 4790, 4792, 4609, 4776, 5970, 3845, 7042, 7040, 1643, 7046, 23586, 1642, 7043, 595, 596, 7529, 890, 54205, 7534, 2185, 4773, 4772, 843, 841, 1869, 1147, 5894, 5579, 5578, 7124, 148327, 8772, 5601, 5602, 5605, 581, 5604, 5925, 836, 2885, 9586, 1654, 5…	1.2379159437054175	0.025940717663960333	0.11800556289449649
hsa05210:Colorectal cancer	3725, 5894, 332, 10297, 387, 51176, 2956, 5601, 5602, 5880, 673, 4292, 5604, 581, 207, 836, 208, 10000, 8312, 8313, 5595, 4088, 4089, 5879, 4609, 5594, 4087, 5599, 2932, 26060, 3845, 1499, 7042, 7040, 369, 7048, 7046, 7043, 595, 596, 8503, 83439, 4436, 324, 5900, 7157, 4437, 5290, 5291, 54205, 2353, 5294, 1630, 5295, 5296	1.3342024415878406	0.05347282883109017	0.2465801064539086
hsa04024:cAMP signaling pathway	3725, 4301, 2149, 5733, 801, 2740, 64399, 154, 153, 482, 480, 1387, 10488, 481, 22800, 6093, 1080, 673, 6548, 476, 1385, 478, 477, 207, 208, 4886, 3352, 10000, 7410, 7074, 1812, 1813, 4790, 4792, 6752, 5142, 5140, 6751, 5970, 1128, 1129, 5350, 2770, 2771, 5348, 51806, 108, 627, 5139, 64411, 1261, 814, 815, 816, 817, 27198, 818, 5566, 5567, 5058, 2778, 2773, 9568, 810, 491, 493, 610, 7434, 5337, 1…	1.184007892070602	0.06939095669917761	0.32255691023296285
hsa04151:PI3K-Akt signaling pathway	51378, 3082, 63923, 55844, 2335, 59345, 3479, 3480, 1975, 10488, 1977, 1978, 5747, 930, 2321, 2324, 3716, 207, 5649, 8115, 3718, 208, 3717, 4602, 3918, 3914, 2846, 3910, 3911, 4790, 3912, 4609, 1436, 22798, 5618, 3845, 7184, 4233, 10319, 1302, 7059, 7057, 7249, 2254, 7450, 148327, 2250, 2475, 7448, 2246, 2247, 2997, 2998, 29941, 4846, 5605, 5604, 2263, 3815, 2264, 2261, 2260, 6198, 6199, 2255, 72…	1.1401366319023365	0.07507315135265191	0.349978795251904
hsa05212:Pancreatic cancer	1869, 1147, 6774, 5894, 9459, 6772, 5888, 5601, 5602, 5880, 675, 7039, 673, 5604, 5925, 3716, 207, 208, 10000, 5595, 4088, 4089, 4790, 5879, 5594, 4087, 8517, 5599, 1956, 5970, 3845, 1029, 1950, 7042, 7040, 369, 7048, 7046, 7043, 595, 8503, 5899, 598, 5898, 1019, 10928, 5900, 7157, 1871, 1870, 5290, 5291, 1021, 5294, 5295, 5296, 998	1.318901098901099	0.07643494247228111	0.35657460471970603
hsa05214:Glioma	6655, 1869, 5579, 5894, 6464, 5578, 801, 3479, 2475, 3480, 5159, 5605, 7039, 673, 5604, 4193, 5925, 207, 399694, 208, 10000, 2885, 5595, 6654, 5594, 3265, 1956, 3845, 1029, 1950, 1026, 369, 51806, 595, 5728, 5154, 8503, 815, 5155, 816, 5156, 817, 818, 1019, 7157, 1871, 1870, 810, 5290, 5291, 1021, 5335, 5336, 25759, 5294, 5295, 5296	1.318901098901099	0.07643494247228111	0.35657460471970603
hsa05100:Bacterial invasion of epithelial cells	26084, 6464, 2335, 7454, 23176, 387, 8218, 2017, 79658, 10163, 5747, 8976, 8936, 55752, 3611, 1759, 1793, 399694, 10093, 10092, 3688, 10095, 10094, 23607, 71, 10109, 5879, 1495, 7414, 868, 4735, 867, 1785, 1496, 1499, 23157, 60, 4233, 5829, 10801, 6714, 391, 8503, 3059, 26052, 9564, 857, 859, 23624, 1398, 5290, 5291, 1399, 2549, 1211, 25759, 10459, 29119, 9844, 1212, 1213, 5294, 5295, 998, 5296, …	1.2891514500537056	0.08826006141426646	0.4142430551744014
hsa04728:Dopaminergic synapse	801, 55844, 59345, 5533, 1388, 10488, 1386, 1385, 207, 208, 10000, 406, 1812, 1813, 1432, 2788, 2787, 9575, 2784, 2783, 2786, 2785, 2770, 2790, 2771, 2791, 2793, 51806, 54331, 1644, 3798, 3799, 815, 816, 817, 818, 5566, 2776, 10681, 5567, 2778, 2773, 2775, 810, 2774, 2782, 6570, 6571, 7054, 55012, 5330, 5579, 5578, 111, 6323, 148327, 2893, 5601, 773, 5602, 2903, 2904, 5600, 776, 774, 5603, 775, 2…	1.2227723780997208	0.10856624856232566	0.5149591233515771
hsa05222:Small cell lung cancer	1869, 1147, 284217, 5915, 2335, 330, 331, 3674, 1288, 1287, 5747, 1282, 1284, 4843, 1285, 5743, 6257, 6258, 5925, 6256, 207, 6502, 208, 9063, 3918, 3685, 3688, 10000, 3914, 3910, 3911, 3912, 4790, 4792, 4609, 8517, 22798, 5970, 3909, 7189, 7188, 7187, 1030, 2272, 7186, 7185, 3655, 595, 5728, 3673, 596, 8503, 9618, 598, 329, 1017, 1019, 10319, 7157, 1871, 1870, 5290, 5291, 54205, 1021, 9134, 79444…	1.2712465688029597	0.11428465758799033	0.54371720496319
hsa04530:Tight junction	10207, 83700, 4301, 8531, 55844, 9863, 64398, 27134, 51776, 23136, 22800, 79784, 4619, 2017, 22989, 49861, 207, 208, 10627, 10000, 11336, 1495, 58494, 1457, 3996, 3993, 1459, 3845, 84612, 9223, 2770, 2771, 4633, 9218, 1460, 8189, 150084, 7525, 260425, 2773, 10686, 4621, 4620, 4625, 4624, 4627, 4626, 4629, 4628, 88, 998, 5579, 5578, 9071, 8573, 9073, 9075, 10398, 9074, 9414, 9076, 387, 8777, 5584,…	1.2147773279352225	0.11951002467932481	0.570151238938188
hsa04660:T cell receptor signaling pathway	3725, 7535, 6655, 5063, 1147, 5894, 940, 7124, 5062, 5533, 5534, 10298, 387, 29851, 5777, 5600, 5605, 5588, 5603, 5604, 5609, 5170, 6885, 1326, 207, 208, 9402, 7410, 10000, 2885, 5595, 4790, 3586, 4793, 4792, 5788, 6654, 4690, 5594, 4794, 1437, 920, 8517, 3265, 7006, 1432, 5970, 2932, 3845, 868, 867, 925, 926, 3702, 3458, 919, 8440, 57144, 959, 8503, 915, 5058, 916, 1019, 917, 23624, 5530, 1739, …	1.2457456773246247	0.1343784025122261	0.6461952126620041
hsa04931:Insulin resistance	10999, 6774, 5781, 10891, 7124, 148327, 6517, 6514, 27330, 948, 2475, 51085, 10488, 2673, 51422, 10062, 2997, 2998, 5580, 57761, 5581, 5601, 5602, 4846, 5588, 5792, 5170, 1385, 207, 208, 7132, 5507, 133522, 6197, 6198, 5590, 6199, 10000, 5834, 9586, 32, 5837, 11001, 5501, 5836, 5500, 5499, 10724, 3643, 4790, 4792, 6195, 5599, 9945, 5106, 1374, 5105, 5970, 2932, 9882, 6945, 5465, 5565, 5564, 5563,…	1.234423322457086	0.15450901350940616	0.7511652727145046
hsa04668:TNF signaling pathway	843, 3725, 841, 840, 1147, 2919, 7124, 6347, 330, 148327, 192111, 3383, 3726, 6352, 6416, 1051, 8772, 8837, 1388, 10488, 8737, 1386, 602, 4217, 5601, 4314, 5602, 5600, 4318, 9252, 5606, 10059, 5743, 5603, 5604, 5609, 64127, 6885, 1326, 5608, 1385, 7133, 207, 836, 208, 7132, 7412, 6364, 10000, 9586, 7128, 5595, 4790, 4792, 5594, 1437, 9530, 8517, 4049, 5599, 1432, 5970, 6401, 7188, 7187, 11035, 71…	1.234423322457086	0.15450901350940616	0.7511652727145046
hsa04917:Prolactin signaling pathway	6655, 2645, 6774, 5894, 6464, 6772, 2099, 6514, 8835, 9655, 8600, 5601, 5602, 5600, 5605, 5603, 5604, 1081, 207, 1586, 399694, 208, 3717, 10000, 2885, 6777, 5595, 6776, 4790, 6654, 5594, 3265, 5599, 5618, 1432, 5970, 2932, 3845, 8651, 3659, 9021, 595, 6714, 8503, 2100, 122809, 5290, 5291, 3973, 25759, 894, 2353, 30837, 5294, 7054, 5295, 2001, 5296	1.2828320802005013	0.2691747292117125	1.3988661937955893
hsa05142:Chagas disease (American trypanosomiasis)	3725, 5330, 841, 1147, 6349, 7124, 55844, 54106, 6347, 6352, 6416, 8772, 8837, 51135, 5601, 5602, 5600, 4843, 5603, 207, 208, 7132, 10000, 5595, 4088, 4790, 3586, 4792, 4087, 5594, 8517, 5599, 1432, 5970, 2767, 3460, 5520, 5521, 7189, 2770, 7042, 2771, 7040, 3458, 3459, 5516, 5515, 5518, 919, 5519, 3553, 7048, 624, 7046, 3654, 7043, 811, 8503, 2776, 915, 916, 2778, 917, 2773, 2775, 5054, 2774, 52…	1.2238512949039264	0.32055263332010253	1.7212317322617077
hsa05230:Central carbon metabolism in cancer	2645, 5894, 5162, 5163, 5160, 6514, 2744, 2475, 5159, 3099, 3098, 3101, 5224, 5223, 5605, 5604, 3091, 2263, 2322, 3815, 207, 2261, 208, 2260, 5979, 10000, 6510, 5595, 5315, 5214, 4609, 23410, 5594, 3265, 1956, 3845, 5213, 5211, 441531, 8140, 4233, 5728, 8503, 5156, 51548, 7157, 5290, 5291, 2539, 5294, 4914, 5295, 5296, 4916	1.2891514500537058	0.3270617486411681	1.7637232882958043
hsa05120:Epithelial cell signaling in Helicobacter pylori infection	3725, 83700, 9550, 1147, 5781, 6352, 6416, 10392, 535, 534, 533, 537, 3577, 50848, 5601, 5602, 5600, 5603, 9296, 50617, 836, 23545, 9114, 4790, 5879, 4792, 58494, 8517, 5599, 1432, 1956, 5970, 51606, 90423, 5803, 245972, 245973, 7082, 4233, 1445, 6714, 10312, 150084, 5058, 28964, 51382, 523, 5335, 5336, 529, 1839, 526, 525, 4067, 528, 998, 527	1.2795309168443496	0.32982263089161457	1.7818650284448734
hsa05166:HTLV-I infection	3725, 2005, 2002, 331, 5533, 5534, 2648, 1390, 6416, 8321, 64682, 10297, 8322, 8323, 1387, 8326, 1386, 22800, 4488, 5159, 7484, 3135, 4214, 4215, 6688, 1385, 7482, 3716, 207, 208, 7480, 3718, 8498, 4602, 7412, 4605, 10000, 3689, 472, 545, 51434, 6777, 51433, 6776, 4790, 8295, 4792, 4609, 1437, 10524, 115650, 4776, 7514, 5970, 3845, 7416, 7417, 821, 7042, 7040, 108, 7048, 7046, 7043, 3113, 811, 54…	1.1386634602701085	0.33239720509467674	1.798846971867929
hsa05203:Viral carcinogenesis	3725, 6774, 23513, 1108, 2648, 79885, 1388, 1387, 10488, 1386, 2957, 2959, 51564, 3135, 4193, 1385, 3716, 3718, 7337, 5366, 6777, 8294, 5934, 6776, 5933, 85477, 4790, 4792, 5970, 3845, 5610, 55869, 10014, 7188, 11036, 7187, 7186, 3516, 10013, 245972, 7185, 5829, 1642, 5966, 595, 8379, 7529, 890, 8850, 5566, 1111, 5567, 9759, 3017, 2966, 2965, 718, 2960, 991, 6672, 7534, 894, 7533, 7532, 7531, 998…	1.1607033889070502	0.36663482680404846	2.030827988765449
hsa05219:Bladder cancer	3265, 1869, 5894, 1956, 1029, 3845, 1026, 1950, 1890, 369, 595, 4313, 6714, 4312, 5605, 4318, 9252, 673, 5604, 4193, 1019, 5925, 11186, 7157, 1871, 2261, 1870, 7380, 5595, 1839, 23604, 1613, 1612, 4609, 7057, 5594, 999	1.35727733969069	0.3958606056258539	2.2385300292333543
hsa04932:Non-alcoholic fatty liver disease (NAFLD)	3725, 29796, 4698, 4697, 374291, 51085, 51422, 4217, 1329, 4296, 3552, 51094, 207, 208, 10000, 4695, 4694, 4790, 54539, 5970, 27089, 6945, 7040, 7186, 5565, 5564, 5563, 1649, 5562, 9021, 10018, 2081, 9370, 8660, 54205, 6389, 5571, 56901, 83737, 998, 1351, 841, 1571, 840, 7124, 1050, 1347, 1345, 10062, 5601, 5602, 637, 581, 6256, 836, 7132, 3953, 7381, 1339, 3952, 5313, 3643, 7386, 5879, 7385, 738…	1.180230089111668	0.42264993120056316	2.43752576338363
hsa04920:Adipocytokine signaling pathway	23205, 6774, 1147, 5781, 10891, 4852, 7124, 6517, 2475, 948, 51422, 5443, 5601, 5602, 5588, 6257, 6258, 6256, 51094, 7133, 207, 208, 3717, 7132, 3953, 10000, 32, 3952, 4790, 81616, 4793, 4792, 4794, 8517, 5599, 5106, 1374, 5105, 5970, 6794, 5465, 7186, 5565, 5564, 5563, 5562, 9021, 8717, 9370, 8660, 2180, 5571, 2538, 3667, 84254, 10645, 2181, 2182	1.2642403109222333	0.4722540606962474	2.8304678636226654
hsa05164:Influenza A	3725, 6772, 4599, 6347, 3337, 7297, 5371, 10898, 10482, 4928, 6352, 6416, 1387, 1386, 5646, 5644, 3552, 3716, 207, 208, 3717, 10000, 56649, 10625, 9641, 4790, 4793, 4792, 1432, 7514, 5970, 7416, 8106, 5045, 3312, 5611, 5610, 9021, 103, 23586, 114548, 4940, 3113, 3115, 3117, 3836, 7113, 3838, 5340, 54205, 27102, 7919, 3123, 3122, 56000, 5894, 5579, 5578, 7706, 7124, 3383, 3109, 3108, 51135, 3305, …	1.169785575048733	0.5157202164184774	3.204949818030567
hsa05132:Salmonella infection	3725, 2919, 6349, 147700, 7454, 6351, 3929, 5586, 5585, 29941, 6093, 5601, 5602, 10163, 5600, 8976, 4843, 5603, 8936, 3552, 834, 7879, 10093, 10092, 929, 10095, 10094, 5595, 71, 64837, 4790, 10109, 5879, 5216, 5217, 5594, 89953, 1437, 5599, 1432, 2318, 3606, 5970, 2316, 2317, 1783, 3460, 3458, 3459, 29108, 58484, 3553, 60, 7082, 9475, 391, 2920, 1778, 3831, 1781, 1780, 7099, 51143, 2353, 3569, 998	1.2408082706766916	0.5198783340251749	3.2424404440407284
hsa05168:Herpes simplex infection	3725, 6772, 29997, 54106, 6347, 7297, 5371, 10482, 8740, 6352, 1387, 29992, 3150, 3135, 83860, 6884, 6885, 3716, 8683, 3717, 10629, 1616, 54926, 6878, 406, 9641, 4790, 4793, 4792, 1457, 1459, 5970, 6891, 6890, 9575, 8764, 5610, 6500, 7189, 51616, 7188, 7187, 727, 7186, 23118, 1460, 9021, 7185, 23586, 4940, 3113, 3115, 3117, 112950, 27097, 54205, 718, 27102, 6672, 5430, 10189, 2969, 5819, 3123, 58…	1.1626089764288021	0.5470470615898155	3.495314656254689
hsa03010:Ribosome	9349, 6160, 6161, 6164, 6204, 6166, 6206, 6165, 6207, 6208, 51081, 6168, 6167, 6169, 9045, 124995, 3921, 55052, 6150, 6217, 6155, 6218, 6154, 6152, 6159, 6158, 6157, 6156, 6224, 6223, 6222, 79590, 6182, 9801, 6181, 6183, 6189, 6188, 6187, 29088, 63875, 6170, 23521, 51116, 55173, 6176, 6175, 51187, 6203, 6202, 29093, 6201, 54948, 11224, 6122, 6123, 6124, 11222, 6125, 2197, 7311, 25873, 65005, 1057…	1.182542233446211	0.5564246600163949	3.5859713476651067
hsa05223:Non-small cell lung cancer	6655, 3265, 1869, 5579, 5894, 5578, 5915, 1956, 3845, 1029, 1950, 83593, 2272, 6789, 369, 595, 8503, 5605, 7039, 673, 5604, 6257, 6258, 5170, 1019, 5925, 6256, 27436, 11186, 207, 7157, 1871, 208, 1870, 5290, 5291, 1021, 10000, 5335, 5336, 2885, 5595, 5294, 5295, 238, 6654, 5296, 5594	1.2891514500537058	0.5612003398275676	3.632845447534905
hsa04721:Synaptic vesicle cycle	2054, 9550, 535, 8775, 534, 533, 6616, 8218, 773, 774, 9296, 1759, 50617, 23545, 161, 163, 9114, 160, 10814, 10815, 22999, 6804, 6809, 6844, 1785, 51606, 90423, 245972, 245973, 1175, 4905, 1173, 5864, 6812, 10312, 26052, 51382, 6857, 523, 1211, 1212, 10497, 1213, 6570, 6571, 529, 112755, 526, 525, 528, 527	1.2784085213032583	0.5622082003782303	3.6428000074077094
hsa04152:AMPK signaling pathway	10890, 10891, 1938, 7249, 55844, 3479, 148327, 6517, 2475, 948, 3480, 2194, 10488, 3156, 1978, 51422, 2203, 2997, 2998, 4218, 1080, 6009, 5170, 6885, 1385, 57521, 51094, 207, 208, 3953, 6198, 6199, 10000, 7248, 9586, 3952, 31, 51719, 3643, 5214, 23411, 5106, 1374, 5105, 6794, 3991, 8789, 5213, 51552, 5520, 5521, 5211, 8900, 3172, 5516, 5565, 5515, 5564, 5209, 5518, 5208, 5563, 5562, 1994, 5207, 5…	1.1880415324024347	0.6357163870031819	4.435201386009258
hsa04930:Type II diabetes mellitus	2645, 5599, 7124, 6517, 8651, 6514, 2475, 8835, 9021, 5580, 5581, 3099, 5601, 773, 3101, 3098, 5602, 8503, 776, 777, 3651, 774, 775, 9370, 8660, 6833, 122809, 5290, 8913, 5291, 5590, 3767, 5595, 3667, 5313, 3643, 5315, 5294, 5295, 5296, 5594	1.312008745267424	0.6385216443994299	4.4683843569661486
hsa04621:NOD-like receptor signaling pathway	7205, 841, 64170, 8517, 5599, 1147, 1432, 3606, 5970, 8767, 7124, 6347, 330, 7189, 6352, 10392, 84674, 3320, 29108, 23118, 58484, 4210, 3553, 7184, 114548, 5601, 5602, 22861, 5600, 55914, 4671, 5603, 329, 838, 64127, 6885, 834, 3326, 7128, 5595, 10454, 9051, 4790, 4793, 4792, 3569, 5594	1.2852449305080882	0.6513966040567852	4.623905900072756
hsa04550:Signaling pathways regulating pluripotency of stem cells	6774, 3720, 3479, 55183, 3480, 8321, 10297, 8322, 8323, 8326, 56916, 4211, 6498, 7484, 10336, 3716, 7482, 207, 3718, 7480, 208, 3717, 9869, 10000, 8312, 8313, 4609, 1432, 3845, 3399, 4090, 4093, 93, 9421, 92, 91, 90, 324, 51384, 83729, 6657, 84108, 5894, 648, 3625, 3624, 6929, 2247, 7994, 2103, 6926, 89780, 1857, 1856, 5600, 5605, 5603, 5604, 2263, 3397, 7976, 3398, 2264, 1855, 2261, 1852, 2260, …	1.1760679895226789	0.6542367081965126	4.658950378388083
hsa04922:Glucagon signaling pathway	5330, 2645, 10891, 2642, 2641, 5162, 801, 5160, 148327, 6514, 5533, 5534, 5260, 10488, 1387, 1386, 5261, 51422, 2997, 2998, 5224, 5223, 1385, 207, 208, 10000, 5834, 9586, 32, 5837, 31, 5836, 5315, 23411, 5140, 5106, 5257, 1374, 5256, 5255, 2033, 3708, 5105, 3709, 57223, 3948, 5465, 5565, 51806, 5564, 108, 5563, 5207, 5562, 441531, 3945, 3276, 815, 816, 2308, 817, 818, 5566, 2776, 5567, 2778, 5531…	1.2129113105344005	0.670360532212489	4.86327182407682
hsa04510:Focal adhesion	1292, 3725, 1291, 284217, 2002, 3082, 63923, 2335, 3479, 330, 331, 1101, 10298, 3676, 3480, 3674, 3679, 1289, 1288, 255631, 1287, 5159, 64098, 6093, 1280, 5747, 1281, 1282, 1284, 673, 1285, 2321, 5170, 3690, 7408, 3691, 2324, 207, 3693, 5649, 208, 1793, 399694, 3694, 3695, 3918, 3685, 3688, 10627, 10000, 7410, 6696, 3914, 1277, 3910, 3911, 1278, 3912, 824, 22798, 2318, 7414, 2316, 2317, 4633, 463…	1.1391759100722103	0.6802085502823936	4.992814716656202
hsa04310:Wnt signaling pathway	3725, 4041, 4040, 6423, 6422, 5533, 81839, 5534, 8321, 8322, 10297, 8323, 59343, 51176, 1387, 8326, 1488, 1487, 7484, 56998, 23500, 79718, 4316, 6885, 57216, 7482, 7480, 8312, 8313, 4609, 1457, 1459, 4776, 1452, 1454, 8945, 6500, 25805, 23291, 9978, 1460, 6477, 90665, 595, 51701, 815, 816, 817, 818, 5566, 324, 5567, 51384, 23002, 57680, 10023, 27101, 894, 4773, 4772, 896, 5330, 122011, 5579, 5578…	1.1735835801625274	0.715075678184498	5.484276383790809
hsa03050:Proteasome	5717, 5718, 5719, 5682, 5710, 9861, 5686, 5713, 5685, 5714, 5684, 5683, 9491, 3458, 23198, 10197, 5698, 5708, 5709, 5707, 5691, 5704, 5690, 5705, 10213, 5693, 5702, 5720, 5692, 5721, 5695, 5700, 7979, 5701, 5687, 5688, 5689	1.3249612125551975	0.7194466259292238	5.54989606278582
hsa05145:Toxoplasmosis	841, 240, 6774, 1147, 284217, 6772, 7124, 330, 7297, 331, 3109, 3108, 51135, 5601, 3305, 5602, 5600, 3306, 5606, 4843, 5603, 5170, 6885, 5608, 3716, 207, 836, 208, 3717, 7132, 10105, 3918, 1234, 3688, 10000, 3914, 5595, 3910, 3911, 3912, 4790, 3310, 3586, 4793, 3587, 4792, 5594, 8517, 22798, 5599, 1432, 5970, 3312, 8651, 3460, 3909, 7189, 2770, 7042, 2771, 7040, 3458, 3459, 23118, 3654, 3655, 704…	1.1873763355757814	0.7262270676245308	5.6536465191308505
hsa04010:MAPK signaling pathway	4208, 3725, 2005, 2002, 27330, 5536, 5533, 5534, 6416, 51776, 3925, 1386, 22800, 5159, 8491, 4217, 673, 9252, 4214, 4215, 4216, 4296, 6885, 9254, 3552, 1326, 207, 208, 409, 929, 408, 1616, 10000, 10912, 4790, 4609, 1432, 8550, 2318, 5970, 2316, 2768, 3845, 2317, 3312, 3315, 7189, 7042, 5801, 7040, 7186, 8649, 4803, 1647, 1649, 51295, 627, 23118, 7048, 1849, 7046, 1845, 7043, 57551, 5154, 51701, 2…	1.1248478338703902	0.7396273706495118	5.866114666878985
hsa04666:Fc gamma R-mediated phagocytosis	5894, 5579, 5578, 382, 7454, 2209, 8877, 3636, 5580, 5581, 3055, 3635, 10163, 5880, 8976, 5604, 8936, 7408, 207, 208, 274, 8394, 1794, 273, 8395, 10093, 10092, 4082, 6198, 10000, 6199, 7410, 10095, 10094, 5595, 85477, 2212, 10109, 5879, 5788, 5594, 65108, 2934, 9846, 1073, 1072, 3984, 6850, 23396, 8853, 8503, 5058, 1398, 5290, 5291, 1399, 5335, 653361, 5336, 5337, 5338, 5294, 50807, 4067, 10451, …	1.2175319250507222	0.781705271795044	6.608590535702275
hsa04810:Regulation of actin cytoskeleton	10152, 2149, 9459, 55845, 2335, 3681, 55740, 10298, 3676, 10297, 3674, 3679, 22800, 5159, 6093, 8396, 5747, 10163, 673, 6548, 8874, 81624, 8936, 3690, 200576, 3691, 3693, 3694, 1793, 8394, 3695, 8395, 10093, 3685, 929, 10092, 3688, 10627, 7410, 3689, 10095, 7074, 10094, 85477, 5216, 5217, 7414, 128239, 2768, 3845, 10672, 1128, 1129, 1073, 1072, 4633, 4638, 23191, 1131, 23396, 5962, 624, 5829, 571…	1.1356810393330266	0.8042963445304198	7.065808774569771
hsa05215:Prostate cancer	6655, 1869, 1147, 5894, 3479, 148327, 2475, 4824, 3480, 51176, 10488, 1387, 5159, 5605, 7039, 673, 5604, 2263, 5170, 4193, 5925, 1385, 207, 208, 2260, 10000, 2885, 9586, 5595, 4790, 3645, 4792, 6654, 5594, 8517, 3265, 2033, 1956, 5970, 2932, 3845, 1027, 1950, 1026, 1499, 369, 3320, 7184, 595, 5728, 596, 8503, 5154, 5155, 83439, 2308, 5156, 1017, 3326, 7157, 1871, 1870, 5290, 5291, 9134, 354, 468,…	1.210123008671103	0.8247713458118656	7.526045130073067
hsa05221:Acute myeloid leukemia	861, 8517, 6655, 3265, 1147, 6774, 5894, 7704, 862, 5970, 3845, 5914, 5371, 3728, 2475, 1050, 369, 51176, 1978, 595, 8503, 5605, 83439, 673, 5604, 6688, 2322, 3815, 5467, 207, 208, 5290, 5291, 6198, 10000, 6199, 2885, 5595, 6777, 6776, 4790, 5294, 5295, 4609, 6654, 5296, 5594	1.2622941281775868	0.8793208498278213	9.062522988372546
hsa04022:cGMP-PKG signaling pathway	4208, 4209, 4205, 801, 487, 489, 5533, 155, 488, 5534, 154, 152, 153, 150, 482, 1388, 480, 10488, 481, 1386, 6093, 6546, 6547, 476, 1385, 7408, 478, 477, 207, 208, 10000, 1910, 5140, 4776, 2768, 2767, 10672, 7416, 7417, 5350, 2770, 2771, 2977, 4638, 51806, 108, 5139, 5138, 624, 2776, 293, 8660, 2773, 292, 810, 291, 491, 493, 185, 490, 7225, 1259, 23439, 1258, 4773, 4772, 2969, 6722, 5330, 10242, …	1.1468076441102757	0.8793741380167934	9.064327315480657
hsa05110:Vibrio cholerae infection	9550, 9601, 5579, 6558, 5578, 10952, 23480, 51606, 9414, 90423, 11015, 535, 534, 533, 11014, 245972, 537, 245973, 60, 7082, 1080, 10312, 5566, 5567, 2778, 9296, 30001, 51382, 50617, 23545, 55176, 523, 3784, 5335, 375, 9114, 5336, 529, 71, 526, 29927, 525, 528, 527	1.2726238673607095	0.8854890590686371	9.276606357847895
hsa04261:Adrenergic signaling in cardiomyocytes	801, 55844, 1390, 154, 153, 7169, 7168, 482, 1388, 480, 10488, 481, 1386, 9252, 6548, 476, 1385, 9254, 478, 207, 477, 208, 10000, 7171, 7170, 1432, 5350, 2770, 4634, 2771, 4633, 51806, 108, 596, 815, 27092, 816, 817, 818, 5566, 2776, 5567, 2778, 2773, 810, 491, 493, 4625, 4624, 185, 186, 490, 23439, 55012, 781, 5330, 114, 784, 785, 112, 5578, 111, 6324, 148327, 6262, 5600, 776, 5603, 775, 7137, 7…	1.1577631128180161	0.8898067172055435	9.433118103832506
hsa04062:Chemokine signaling pathway	10344, 6774, 6772, 6349, 59345, 6347, 157, 156, 6352, 6351, 6356, 6355, 6354, 6093, 5747, 673, 9547, 207, 208, 3718, 399694, 3717, 1794, 409, 6361, 408, 6364, 7410, 10000, 6363, 6366, 6368, 6367, 7074, 6777, 4790, 4793, 4792, 5970, 2788, 3845, 2787, 2268, 2784, 2783, 2786, 2785, 2790, 2770, 2791, 2771, 2793, 6374, 54331, 6373, 108, 6372, 5829, 2833, 5566, 5567, 9564, 10681, 5058, 2773, 1398, 6387…	1.1363631300473405	0.896501936486064	9.687795363889117
hsa05160:Hepatitis C	6655, 6774, 1147, 5894, 6772, 7124, 9071, 55844, 9073, 7297, 9075, 949, 9074, 9076, 3434, 8737, 10197, 10062, 5601, 149461, 5602, 5600, 673, 49861, 5603, 5170, 10379, 6256, 3716, 207, 975, 208, 7132, 10000, 2885, 5595, 9641, 4790, 4792, 3646, 6654, 5594, 3661, 8554, 8517, 3265, 5599, 1432, 1956, 5970, 2932, 3845, 1950, 1026, 5610, 5520, 5521, 7189, 5465, 7187, 7186, 5516, 5515, 369, 5518, 3454, 3…	1.174183265180495	0.9082345994984268	10.174633272102385
hsa05031:Amphetamine addiction	3725, 23237, 5579, 5578, 801, 111, 148327, 5533, 5534, 2893, 1388, 10488, 1386, 2902, 2903, 2904, 2905, 776, 775, 2892, 2891, 2890, 1385, 5501, 9586, 5500, 5499, 1812, 23411, 2354, 6804, 51806, 1644, 84152, 814, 815, 816, 817, 818, 5566, 5567, 2778, 810, 5530, 6531, 468, 6570, 6571, 2353, 116443, 7054, 116444	1.2414051000517166	0.9132115850645278	10.399371502701904
hsa05030:Cocaine addiction	3725, 26086, 2913, 1742, 2354, 5970, 111, 148327, 2770, 2771, 1388, 10488, 1386, 627, 1644, 84152, 2902, 8851, 2903, 2904, 2905, 5566, 5567, 2891, 1385, 2778, 2773, 1020, 6531, 8787, 468, 9586, 6570, 1812, 6571, 1813, 4790, 7054, 116443, 116444	1.2800085319682184	0.9391276350149119	11.815788918809655
hsa05131:Shigellosis	1147, 8767, 7454, 10392, 6093, 2017, 5601, 5602, 10163, 5600, 8976, 5603, 8936, 64127, 25, 1793, 10093, 7307, 10092, 3688, 10095, 10094, 5595, 71, 4790, 4793, 10109, 5879, 4792, 5216, 5217, 5594, 8517, 5599, 1432, 5970, 7414, 8945, 960, 23291, 60, 9474, 9475, 391, 6714, 3059, 1398, 1399, 10459, 9844, 998	1.2371695367450886	0.9514804105621933	12.709768460708815
hsa05162:Measles	6774, 1147, 6772, 940, 4599, 54106, 7297, 6869, 25898, 7161, 51135, 3305, 3306, 5588, 10332, 6885, 10379, 3552, 3716, 1796, 207, 3718, 208, 3717, 6504, 10000, 7128, 6777, 9641, 6776, 4790, 3310, 4793, 4792, 1457, 51209, 3661, 1459, 9367, 3561, 5970, 2932, 1027, 3312, 3460, 5610, 7189, 3458, 3459, 3454, 8795, 3455, 8794, 23118, 1460, 3553, 103, 3654, 23586, 4940, 595, 8503, 1017, 915, 1965, 916, 1…	1.1669043297899921	0.9532388049602514	12.854404968656407
hsa05202:Transcriptional misregulation in cancer	4208, 942, 2005, 3479, 5371, 3728, 7490, 8013, 3480, 2209, 3486, 4211, 6495, 604, 4314, 5747, 4318, 4291, 2321, 2322, 6688, 4193, 8938, 4298, 4297, 9915, 4299, 3695, 929, 6692, 472, 4221, 4790, 4609, 1437, 1436, 7102, 8861, 5970, 171558, 2313, 1991, 51804, 1649, 51513, 7048, 4804, 7185, 4233, 5966, 5154, 64083, 598, 2308, 6760, 7113, 51384, 3020, 26471, 4300, 894, 4005, 7849, 7704, 4353, 648, 555…	1.139982120907364	0.9611298006562029	13.574995208927099
hsa04919:Thyroid hormone signaling pathway	5330, 9969, 9968, 4854, 5333, 4853, 5894, 5579, 6772, 5578, 4851, 7249, 9862, 9282, 2099, 8841, 2648, 2475, 482, 480, 1387, 481, 7068, 7067, 10231, 9442, 9611, 6009, 5605, 6548, 5604, 3091, 6257, 5170, 6258, 113026, 4193, 3690, 476, 6256, 9440, 478, 207, 477, 208, 3685, 10000, 29079, 54361, 5595, 71, 4609, 5594, 117247, 25942, 3265, 2033, 2932, 3845, 8202, 9882, 5350, 1499, 8648, 5208, 60, 595, 6…	1.1682935016111708	0.9638450191673172	13.855688938174481
hsa03013:RNA transport	55746, 23511, 2332, 8672, 23279, 10482, 79902, 4927, 4928, 8668, 10921, 59343, 8669, 1974, 1975, 6612, 1977, 53371, 1978, 6613, 8021, 51367, 4686, 100101267, 4116, 22985, 1982, 1983, 1981, 7175, 7341, 6606, 26986, 23636, 79760, 79023, 9984, 7514, 22794, 1917, 8761, 7329, 1915, 55110, 727851, 5042, 9883, 84220, 51808, 9775, 23191, 10940, 9631, 3837, 140886, 8663, 8662, 10419, 8661, 8667, 8666, 866…	1.1374075814536342	0.9677555286217944	14.297541160199644
hsa05152:Tuberculosis	4046, 11151, 6772, 801, 54106, 5533, 5534, 3929, 535, 2209, 1387, 533, 1520, 2207, 8877, 537, 3920, 51561, 10332, 64127, 1385, 3552, 3716, 50617, 207, 208, 7879, 3717, 929, 10000, 3689, 3916, 2215, 8411, 4790, 2212, 2214, 1432, 5970, 3313, 9902, 51606, 7189, 7042, 7040, 4802, 7421, 51806, 4800, 245972, 1509, 7043, 3113, 3115, 1263, 596, 3117, 815, 816, 10312, 817, 818, 3329, 810, 54205, 718, 3123…	1.1374075814536342	0.9677555286217944	14.297541160199644
hsa05130:Pathogenic Escherichia coli infection	7846, 347733, 5578, 79861, 7454, 1499, 10382, 10383, 347688, 10381, 387, 7277, 8440, 84790, 60, 9475, 6093, 2017, 81027, 7280, 8976, 3059, 25, 10376, 10093, 7430, 10092, 929, 9181, 3688, 7099, 84617, 10095, 10094, 203068, 2534, 71, 4691, 10109, 998, 999, 4690	1.2633684210526315	0.9682281578336156	14.354373965054956
hsa00010:Glycolysis / Gluconeogenesis	2645, 5230, 5162, 5160, 83440, 55276, 7167, 2203, 3099, 3098, 3101, 127, 5224, 5223, 128, 124, 230, 5313, 2023, 5315, 5214, 669, 5106, 5105, 219, 217, 10327, 218, 8789, 5213, 5211, 3948, 2597, 2027, 2026, 441531, 3945, 130, 221, 222, 224, 226, 1738, 1737, 229, 9562, 3939, 2538, 5236, 2821	1.2327951025103743	0.976107965173459	15.44407731159103
hsa04350:TGF-beta signaling pathway	9241, 7124, 3625, 3624, 60436, 387, 1387, 6093, 3397, 3398, 6198, 6199, 8454, 4088, 5595, 5933, 4089, 4086, 4609, 4087, 5594, 57154, 2033, 8200, 6500, 8646, 7042, 25805, 7040, 3458, 1030, 5516, 5515, 5518, 4090, 3399, 5519, 5308, 9978, 10468, 7048, 4052, 7046, 4093, 7044, 4092, 7043, 4091, 392255, 659, 657, 658, 93, 92, 91, 90, 652, 1875, 650, 1874, 655, 9372, 83729, 1634, 7057	1.1922030686472278	0.9881445282482928	18.064519620321317
hsa05216:Thyroid cancer	7849, 3265, 8030, 10342, 8031, 3845, 1499, 51176, 595, 5605, 673, 83439, 5604, 6257, 6258, 6256, 5468, 7157, 5979, 7175, 5595, 4914, 4609, 7170, 999, 5594	1.3484227810906577	0.9890569137576112	18.358762588250677
hsa00020:Citrate cycle (TCA cycle)	3420, 5106, 1743, 1431, 5162, 5105, 5160, 2271, 4967, 3419, 3418, 3417, 48, 47, 4191, 1738, 1737, 4190, 55753, 5091, 6389, 8802, 8803, 8801, 3421, 50	1.3484227810906577	0.9890569137576112	18.358762588250677
hsa05340:Primary immunodeficiency	7535, 115650, 920, 8517, 3561, 6891, 925, 926, 6890, 29851, 7374, 3575, 100, 959, 695, 958, 57379, 29760, 930, 5897, 5896, 915, 916, 8625, 973, 23495, 3932, 5788, 64421	1.3217057796005165	0.990528920916782	18.88689862679752
hsa05213:Endometrial cancer	6655, 3265, 5894, 2002, 1956, 2932, 3845, 1950, 1496, 1499, 10297, 369, 51176, 595, 5728, 8503, 5605, 83439, 673, 4292, 5604, 324, 5170, 3611, 207, 7157, 208, 5290, 5291, 10000, 2885, 29119, 8312, 8313, 5595, 5294, 5295, 1495, 4609, 6654, 5296, 5594, 999	1.2437005976479663	0.9942027976532654	20.65601966414584
hsa04664:Fc epsilon RI signaling pathway	6655, 5579, 5894, 5578, 7124, 6416, 2207, 2205, 3635, 5601, 5602, 5880, 5600, 5605, 5321, 5606, 5603, 5604, 5609, 5170, 5608, 207, 208, 10000, 7410, 2885, 5595, 5879, 6654, 5594, 1437, 3265, 5599, 1432, 9846, 3845, 6850, 695, 283748, 8503, 5290, 5291, 3937, 5335, 5336, 2534, 5294, 4067, 10451, 5295, 5296	1.2175319250507222	0.9948718928360964	21.09196117515353
hsa04914:Progesterone-mediated oocyte maturation	114, 112, 5894, 111, 245711, 3479, 27330, 983, 10393, 3480, 64682, 51529, 5601, 5602, 5600, 673, 5603, 5604, 196883, 207, 208, 6197, 10000, 51434, 5595, 51433, 29882, 4085, 29945, 5594, 6195, 5140, 5599, 8697, 1432, 3845, 2770, 2771, 8900, 51343, 369, 3320, 108, 5347, 8379, 8503, 5241, 890, 1017, 5566, 5567, 246184, 2773, 3326, 996, 5290, 5291, 994, 9133, 10459, 993, 891, 5294, 5295, 85417, 5296	1.1817221625492302	0.9970852586276937	23.069467904005947
hsa04064:NF-kappa B signaling pathway	7535, 1147, 7706, 7124, 330, 331, 3383, 8740, 6351, 3929, 8837, 8737, 51135, 5328, 8600, 5588, 5743, 6885, 7132, 55367, 7412, 929, 6363, 6366, 472, 7128, 4790, 4792, 1457, 115650, 4049, 8517, 1459, 5970, 10673, 7329, 7189, 7188, 7187, 7186, 6850, 4050, 353376, 23118, 1460, 3553, 7185, 3654, 8717, 4055, 23586, 959, 958, 695, 596, 29760, 598, 329, 51588, 6387, 5335, 7099, 5336, 10454, 3932, 4067, 2…	1.1717287404557908	0.9994703138242419	28.742828556125755
hsa05020:Prion diseases	6647, 10963, 4685, 5605, 1958, 2002, 581, 5604, 5566, 5567, 3552, 3309, 5621, 735, 729, 6352, 727, 713, 712, 714, 5595, 2534, 3553, 3569, 730, 732, 5594	1.3099442153771526	0.9996064810396722	29.687756660640797
hsa04611:Platelet activation	5330, 114, 64805, 112, 54518, 2149, 111, 7450, 5739, 8673, 8773, 3674, 387, 2244, 2207, 4659, 1289, 255631, 5584, 6093, 1280, 1281, 4846, 5600, 10235, 5321, 5603, 6786, 23365, 85366, 3690, 7408, 196883, 207, 208, 5028, 3688, 10627, 5590, 10000, 5501, 5500, 5499, 1277, 2983, 5595, 2909, 71, 1278, 2212, 5592, 5593, 5594, 51206, 1432, 3708, 3709, 10672, 2266, 2770, 2771, 2977, 6850, 4638, 108, 60, 9…	1.133975812547241	0.9998630066854169	32.94307611382396
hsa04923:Regulation of lipolysis in adipocytes	134, 5140, 114, 112, 2167, 4852, 5733, 111, 3991, 155, 154, 2770, 7253, 2771, 153, 108, 5346, 11343, 4881, 8503, 5743, 5566, 5567, 1081, 8660, 2778, 196883, 2773, 207, 4886, 208, 5290, 5291, 10000, 57104, 51099, 3667, 3643, 5294, 5592, 5295, 5593, 5296	1.2202345486357402	0.9998800221494	33.34141974074115
hsa04210:Apoptosis	843, 824, 841, 8517, 840, 823, 1147, 3563, 5970, 7124, 330, 331, 1439, 7186, 8772, 8837, 4803, 8795, 8737, 8794, 8717, 596, 8503, 637, 598, 329, 581, 207, 7157, 836, 208, 7132, 5290, 5291, 355, 54205, 1676, 10000, 356, 472, 2021, 4790, 5294, 4792, 4914, 5295, 9131, 5296	1.2032080200501254	0.999919374193268	34.52117176876395
hsa05133:Pertussis	3725, 840, 801, 7124, 10392, 387, 51135, 5601, 5602, 5600, 51561, 5603, 4843, 3552, 834, 3394, 836, 929, 3688, 3689, 5595, 4790, 3586, 5594, 3661, 5599, 1432, 5970, 1073, 1072, 2770, 7189, 729238, 2771, 727, 725, 6374, 51806, 29108, 6372, 722, 353376, 3659, 720, 3553, 3654, 114548, 2773, 653509, 810, 718, 713, 7099, 712, 714, 2353, 710, 3569	1.1788186682923525	0.9999396917393942	35.36971699003898
hsa05012:Parkinson's disease	1351, 29796, 4698, 4697, 111, 9246, 374291, 539, 65018, 1347, 1345, 51465, 506, 1329, 509, 7314, 5071, 836, 10105, 7381, 7345, 1339, 10476, 1812, 4695, 1813, 4694, 7386, 7385, 7384, 54539, 135, 4709, 4705, 4706, 9627, 7327, 4704, 7416, 4702, 7417, 4700, 10975, 27429, 4731, 27089, 2770, 513, 2771, 125965, 7332, 84701, 126328, 516, 515, 514, 4728, 6622, 4729, 4719, 4724, 4712, 7318, 5566, 4723, 471…	1.1310155388471177	0.9999624374941152	36.72988753506071
hsa04912:GnRH signaling pathway	3725, 5330, 114, 6655, 112, 5894, 5579, 2002, 5578, 111, 801, 6416, 5580, 5601, 5602, 4313, 5600, 5605, 776, 5606, 5321, 4214, 5603, 4215, 4216, 5604, 775, 5609, 778, 1081, 5608, 779, 196883, 2885, 5595, 5598, 6654, 5594, 3265, 5599, 1432, 3708, 1956, 3709, 2767, 3845, 51806, 108, 4323, 283748, 6714, 815, 816, 817, 818, 5566, 2776, 5567, 2778, 2798, 810, 5337, 468, 5338, 1839, 2185, 998	1.1582605940137702	0.9999866117941738	39.59525711008695
hsa05410:Hypertrophic cardiomyopathy (HCM)	781, 784, 785, 7124, 3479, 6262, 4000, 3676, 7169, 7168, 3674, 3679, 2010, 51422, 1756, 776, 775, 7137, 3690, 778, 3691, 9254, 779, 7134, 3693, 3694, 3695, 3685, 3688, 7171, 70, 71, 7170, 6445, 6442, 6443, 8516, 1605, 4634, 7042, 7139, 4633, 7040, 5565, 5564, 5563, 5562, 7273, 60, 3655, 7043, 3673, 27092, 5571, 1674, 1636, 3569	1.1743639921722113	0.9999900408807432	40.39287260677551
hsa00970:Aminoacyl-tRNA biosynthesis	79587, 55157, 5917, 6301, 51067, 7453, 16, 5188, 3035, 2193, 54938, 57038, 4677, 23395, 10056, 57505, 8565, 79731, 2617, 3735, 123283, 51520, 7407, 25973, 3376, 833, 80222, 123263, 6897, 1615, 23438, 5859, 124454, 4141, 2058, 10667	1.2305536568694464	0.9999972443686341	43.73602663546736
hsa04340:Hedgehog signaling pathway	2619, 1456, 6469, 2735, 1453, 122011, 1452, 1455, 4036, 1454, 53944, 5566, 2932, 8945, 51684, 5567, 5727, 64399, 3549, 23291, 6608, 8643	1.3235288220551378	0.9999984275229702	45.136290654180044
hsa04915:Estrogen signaling pathway	3725, 5330, 114, 6655, 112, 5894, 6464, 111, 801, 148327, 2099, 2289, 2911, 2288, 1388, 10488, 1386, 5580, 3305, 4313, 4846, 3306, 5605, 4318, 5604, 1385, 196883, 207, 399694, 208, 10000, 2885, 9586, 5595, 3310, 6654, 5594, 3265, 3708, 1956, 3709, 3845, 3312, 3760, 2770, 2771, 51806, 3320, 108, 7184, 6714, 2550, 8503, 5566, 5567, 2776, 2100, 2778, 2773, 3326, 9568, 2775, 810, 3762, 5290, 5291, 25…	1.1436742898913952	0.9999986603060432	45.52974771918641
hsa04015:Rap1 signaling pathway	4301, 51378, 54518, 2149, 801, 3082, 3479, 9863, 3480, 3674, 889, 5159, 57568, 673, 2321, 1902, 3690, 7408, 2324, 207, 208, 5028, 3688, 10000, 3689, 2846, 7074, 1813, 5216, 5217, 1436, 1432, 3845, 84612, 9223, 9771, 2770, 2771, 4803, 51806, 1500, 108, 7423, 4804, 1268, 4233, 64411, 5154, 5899, 5155, 5898, 5156, 9564, 260425, 2776, 2778, 2277, 2773, 2775, 810, 1398, 3937, 1399, 5335, 998, 7057, 99…	1.0924649933290937	0.999999455928821	47.690780817929024
hsa01200:Carbon metabolism	6120, 2645, 5230, 5162, 5160, 2098, 83440, 22934, 25796, 34, 847, 2746, 39, 38, 9104, 4967, 7167, 26227, 2203, 3099, 3101, 3098, 1892, 5224, 5223, 128, 230, 4191, 2806, 54363, 4190, 55753, 26007, 2805, 4594, 5313, 2023, 5315, 5214, 3420, 1743, 1373, 1431, 8789, 5213, 5211, 6888, 2271, 2875, 3030, 3419, 2597, 3418, 4329, 3417, 7086, 6472, 2027, 441531, 2026, 48, 4200, 29968, 226, 2731, 26275, 1738…	1.1314570830746593	0.999999473400387	47.767426264563085
hsa04071:Sphingolipid signaling pathway	5330, 5894, 5579, 5578, 7124, 55844, 253782, 387, 2207, 8877, 2205, 8879, 10715, 29956, 5581, 4217, 6093, 5601, 53637, 5602, 5880, 4846, 5600, 637, 5605, 4363, 5603, 581, 5604, 5170, 1901, 207, 208, 7132, 5590, 10000, 5595, 4790, 5879, 5594, 134, 3265, 5599, 1432, 5970, 2768, 9846, 10672, 3845, 91012, 5520, 5521, 2770, 2771, 7186, 5516, 5515, 5518, 5519, 624, 1509, 8717, 9475, 5728, 596, 8503, 85…	1.1248478338703902	0.9999994954568574	47.86773058063976
hsa04720:Long-term potentiation	5330, 2915, 114, 5579, 5894, 5578, 801, 27330, 2911, 5533, 5534, 1387, 2902, 2903, 2904, 5605, 2905, 673, 775, 5604, 2891, 2890, 6197, 5502, 5501, 5500, 5499, 5595, 5594, 6195, 3265, 2033, 3708, 3709, 3845, 51806, 369, 5906, 814, 815, 5908, 816, 817, 818, 5566, 5567, 2776, 810, 5530, 468	1.1750078320802004	0.9999999154307306	51.8873328325273
hsa05218:Melanoma	1869, 5894, 3082, 2254, 3479, 2250, 3480, 2246, 2247, 5159, 5605, 673, 5604, 4193, 5925, 207, 208, 2260, 10000, 2255, 2257, 5595, 5594, 3265, 1956, 1029, 3845, 1026, 1950, 8817, 369, 4233, 595, 5728, 5154, 8503, 5155, 5156, 1019, 7157, 1871, 1870, 5290, 5291, 1021, 4286, 5294, 5295, 5296, 999	1.1750078320802004	0.9999999154307306	51.8873328325273
hsa04380:Osteoclast differentiation	3725, 10859, 1147, 6772, 7124, 10990, 7297, 5533, 3726, 5534, 2209, 8878, 8600, 27035, 5601, 5602, 5600, 5603, 5604, 5609, 6688, 3690, 6885, 10379, 5608, 3552, 1385, 3716, 207, 8061, 4982, 208, 55423, 7132, 10000, 2885, 5595, 2215, 4790, 2212, 5879, 4792, 2214, 5594, 1436, 8517, 7006, 5599, 1432, 2355, 5970, 2354, 9846, 10326, 8651, 3460, 7189, 7042, 3458, 7040, 7186, 3459, 6850, 2274, 3454, 3455…	1.1162574404761902	0.9999999224277852	52.073635990279165
hsa04650:Natural killer cell mediated cytotoxicity	7535, 6655, 5781, 5894, 3824, 5579, 6464, 5578, 3384, 7124, 5533, 3383, 5534, 2207, 5777, 117157, 5880, 6452, 637, 5605, 673, 5604, 836, 399694, 5551, 7410, 2885, 3689, 5595, 2215, 79465, 5879, 2214, 6654, 5594, 1437, 9437, 3265, 3845, 962, 3460, 3804, 3458, 3459, 6850, 369, 919, 3454, 8795, 3455, 8794, 8503, 259197, 5058, 51744, 5530, 5290, 5291, 355, 3937, 5335, 356, 25759, 5336, 2534, 4773, 21…	1.1356810393330266	0.9999999287285108	52.25568156088174
hsa04620:Toll-like receptor signaling pathway	3725, 841, 941, 1147, 942, 6772, 6349, 7124, 54106, 6352, 6416, 6351, 8772, 3929, 8737, 51135, 5601, 5602, 5600, 5605, 5606, 5603, 5604, 5609, 6885, 1326, 5608, 207, 208, 929, 10000, 6696, 5595, 9641, 4790, 5879, 4792, 5594, 3661, 8517, 5599, 1432, 5970, 7189, 7187, 54472, 6373, 3454, 3455, 23118, 353376, 3553, 3654, 958, 8503, 29110, 5290, 5291, 4283, 7098, 7099, 10454, 2353, 5294, 3663, 5295, 3…	1.1404032058167397	0.9999999627666605	53.628221822750554
hsa04115:p53 signaling pathway	841, 2810, 7249, 3479, 983, 25898, 64393, 3486, 50484, 575, 7161, 5268, 8493, 637, 4194, 581, 4193, 836, 5366, 55367, 64326, 10912, 472, 545, 11200, 1029, 1026, 1647, 1643, 51512, 6477, 595, 3732, 5728, 1111, 1017, 1019, 5054, 7157, 55240, 9134, 1021, 54205, 355, 9133, 894, 891, 900, 85417, 7057, 896, 901	1.1672913627351962	0.9999999767625277	54.60000623137411
hsa01130:Biosynthesis of antibiotics	2645, 4047, 5230, 5162, 5160, 4598, 25796, 34, 158, 39, 38, 7167, 1629, 3156, 2203, 3099, 203, 3098, 204, 5224, 1892, 5223, 2653, 4191, 4190, 55753, 7941, 271, 4833, 5831, 4830, 4597, 4831, 471, 4832, 875, 1491, 2023, 5214, 1610, 3420, 1431, 219, 26289, 1595, 217, 8382, 10327, 3028, 3948, 6888, 2271, 3032, 3030, 2597, 3419, 3418, 3417, 6472, 4942, 3945, 95, 224, 29968, 65263, 226, 229, 2639, 189,…	1.0870567507878608	0.9999999859408832	55.61339703839664
hsa04540:Gap junction	5330, 2915, 114, 6655, 112, 7846, 5579, 5894, 5578, 111, 2911, 983, 10382, 153, 10383, 10381, 5159, 7280, 5605, 5604, 1902, 196883, 10376, 2885, 1812, 5595, 2983, 1813, 5598, 5592, 5593, 6654, 5594, 3265, 1453, 347733, 3708, 1956, 3709, 79861, 2767, 3845, 1950, 2770, 2697, 3356, 2771, 2977, 347688, 3357, 108, 7277, 84790, 7082, 6714, 81027, 5154, 5155, 5156, 5566, 5567, 2776, 2778, 2773, 84617, 2…	1.1409731224613255	0.9999999927418838	56.912371934158855
hsa01230:Biosynthesis of amino acids	6120, 5230, 383, 22934, 435, 7167, 26227, 5224, 5223, 230, 2806, 2805, 5831, 445, 5832, 4548, 875, 1491, 5313, 2023, 5315, 5214, 3420, 1373, 1431, 5213, 5009, 5211, 6888, 2875, 3419, 2597, 3418, 3417, 7086, 6472, 2027, 2026, 441531, 48, 95, 29968, 65263, 226, 229, 5053, 5091, 6898, 5631, 27430, 4143, 4144, 3421, 50	1.160236305048335	0.9999999935066863	57.12736713243931
hsa04150:mTOR signaling pathway	5579, 10325, 5578, 7249, 7124, 25989, 3479, 10670, 6794, 27330, 2475, 9470, 5563, 1975, 5562, 1977, 1978, 64121, 5728, 8503, 8408, 6009, 673, 5170, 57521, 207, 208, 5290, 5291, 6197, 64223, 6198, 10000, 6199, 7248, 51719, 5595, 3667, 5294, 5295, 6194, 5296, 5594, 6195	1.1817221625492302	0.9999999967571798	58.44402268502367
hsa04145:Phagosome	9550, 11151, 9341, 949, 948, 535, 534, 2209, 533, 1520, 537, 3920, 2204, 9146, 7280, 3135, 10332, 3690, 200576, 8685, 50617, 3693, 7879, 1514, 929, 3685, 3688, 3689, 3916, 2215, 8411, 2212, 2214, 78989, 81035, 347733, 6891, 1783, 23480, 6890, 821, 9902, 51606, 729238, 347688, 53407, 245972, 84790, 245973, 3113, 811, 3115, 81027, 3117, 10312, 51382, 653509, 1778, 55176, 523, 718, 1781, 1780, 84617…	1.1002489445089234	0.9999999988539678	60.341161778135856
hsa03015:mRNA surveillance pathway	11052, 11051, 1477, 56000, 1479, 55844, 10898, 10482, 10921, 55339, 2107, 29894, 53981, 26528, 124540, 5411, 55916, 4686, 8732, 4116, 8731, 22985, 10767, 10914, 5501, 5500, 5976, 5499, 26986, 79869, 26019, 22794, 2935, 8106, 55110, 8761, 51692, 5520, 5042, 5521, 80335, 5516, 9775, 29107, 5515, 5518, 5519, 81608, 8189, 9939, 51585, 140886, 5525, 5523, 5522, 5529, 23283, 5528, 4440, 22916, 5526, 10…	1.136751763128752	0.9999999996002495	62.1739298170311
hsa04921:Oxytocin signaling pathway	4208, 3725, 57172, 2002, 801, 5020, 5533, 5534, 51422, 6093, 5743, 9254, 8536, 4776, 3845, 2770, 2771, 2977, 4638, 5565, 4637, 51806, 5564, 108, 5563, 5562, 595, 814, 815, 27092, 816, 817, 818, 5566, 5567, 2776, 2778, 2773, 2775, 810, 5571, 4773, 4772, 781, 5330, 114, 784, 6261, 785, 112, 5894, 5579, 1938, 5578, 111, 6262, 10398, 6263, 387, 4659, 4846, 776, 5605, 5321, 775, 5604, 85366, 778, 779,…	1.0975208290997764	0.999999999897707	64.42060661508494
hsa05140:Leishmaniasis	3725, 2002, 6772, 7124, 3676, 2209, 3109, 3108, 51135, 5777, 5600, 5603, 5743, 4843, 6885, 3552, 3716, 3717, 3688, 3689, 5595, 2215, 4790, 3586, 4793, 2212, 4792, 2214, 5594, 65108, 1432, 5970, 3460, 7042, 7189, 7040, 3458, 3459, 23118, 3553, 3654, 7043, 3113, 3115, 3117, 718, 653361, 7099, 10454, 2353, 3123, 3122	1.1501253132832079	0.9999999999938118	68.63335934768944
hsa04662:B cell receptor signaling pathway	3725, 6655, 1147, 5894, 5533, 5534, 3636, 5777, 3635, 5880, 5605, 930, 5604, 933, 973, 207, 975, 1380, 208, 974, 10000, 7410, 2885, 5595, 4790, 4793, 4792, 5879, 6654, 4794, 5594, 8517, 3265, 5970, 2932, 3845, 6850, 695, 8503, 29760, 5530, 5290, 5291, 5336, 4773, 2353, 4772, 5294, 4067, 10451, 5295, 5296	1.1501253132832079	0.9999999999938118	68.63335934768944
hsa05414:Dilated cardiomyopathy	781, 114, 784, 112, 785, 111, 7124, 3479, 6262, 4000, 3676, 153, 7169, 7168, 3674, 3679, 2010, 1756, 776, 775, 7137, 3690, 778, 3691, 9254, 779, 196883, 3693, 7134, 3694, 3695, 3685, 3688, 7171, 70, 71, 7170, 6445, 6442, 6443, 8516, 1605, 5350, 4634, 7042, 7139, 4633, 7040, 108, 7273, 60, 3655, 7043, 3673, 27092, 5566, 5567, 2778, 1674	1.1376486087012403	0.9999999999953892	69.04526113335419
hsa04713:Circadian entrainment	117, 5330, 114, 6261, 112, 5579, 5578, 111, 801, 59345, 6262, 6263, 2893, 2902, 2903, 2904, 2905, 776, 9252, 775, 2892, 2891, 2890, 1385, 196883, 4543, 2983, 5595, 5592, 5593, 5594, 3708, 5187, 2788, 2787, 9722, 2784, 3760, 2783, 2786, 2785, 2770, 2790, 2771, 2791, 2977, 2793, 51806, 108, 54331, 55970, 815, 816, 817, 818, 5566, 10681, 5567, 2776, 2778, 2773, 2775, 810, 8912, 3762, 8913, 2782, 2353	1.1238756231237435	0.9999999999984607	70.53382265283552
hsa04725:Cholinergic synapse	5330, 114, 112, 5579, 5578, 111, 59345, 148327, 10488, 773, 1137, 60482, 1139, 776, 774, 775, 5604, 778, 1385, 779, 196883, 207, 208, 3717, 10000, 3784, 3785, 9586, 3786, 5595, 5594, 3265, 3708, 3709, 2788, 2767, 3845, 2787, 2784, 1128, 3761, 2783, 1129, 3760, 2786, 2785, 2770, 2790, 2771, 2791, 2793, 1131, 108, 54331, 55970, 596, 8503, 814, 815, 816, 817, 818, 5566, 10681, 2776, 5567, 2773, 2775…	1.1104373082238306	0.9999999999996797	72.54053985252928
hsa04670:Leukocyte transendothelial migration	1003, 4301, 83700, 5781, 7294, 5579, 5578, 9071, 9073, 9075, 9074, 10398, 3383, 9076, 3676, 387, 81, 87, 29895, 50848, 27035, 149461, 6093, 4313, 5747, 5880, 5600, 4318, 49861, 5603, 7408, 7412, 3688, 7070, 7410, 10627, 3689, 2909, 71, 1495, 5879, 58494, 1432, 7414, 1496, 3702, 83593, 1499, 2770, 2771, 4633, 1500, 1366, 1364, 60, 5829, 9475, 5906, 8503, 5908, 9564, 10686, 2773, 5290, 7430, 6387, …	1.1074982911825018	0.9999999999998759	73.68486799805014
hsa04961:Endocrine and other factor-regulated calcium reabsorption	5330, 112, 5579, 5578, 1785, 2099, 8766, 482, 7421, 480, 481, 624, 1175, 8218, 1173, 5745, 26052, 5566, 5567, 2776, 476, 3817, 2778, 478, 1759, 477, 793, 161, 163, 1211, 1212, 1213, 160, 23439	1.18921722911931	0.9999999999999712	75.35980444824517
hsa05010:Alzheimer's disease	29796, 8883, 4698, 4697, 801, 487, 489, 5533, 488, 5534, 374291, 539, 4311, 1329, 4035, 348, 10476, 4695, 4694, 824, 54539, 4023, 823, 3028, 51107, 27089, 513, 51806, 2597, 22926, 3416, 516, 515, 514, 8851, 2081, 2776, 498, 23621, 322, 810, 54205, 6389, 23385, 56901, 1351, 5330, 841, 840, 7124, 6263, 8772, 1347, 1345, 2902, 506, 2903, 2904, 2905, 509, 637, 776, 775, 778, 779, 836, 7132, 7381, 133…	1.0851717902350813	0.9999999999999725	75.40668894170113

## Sheet: Unique KEGG pathways
Supplementary Table vIg: The unique KEGG pathways affected by the proteins involved in multi-cancer edgetic gains and losses.
Enriched KEGG pathway	Perturbation
hsa03460:Fanconi anemia pathway	Edgetic Gains
hsa03008:Ribosome biogenesis in eukaryotes	Edgetic Gains
hsa03018:RNA degradation	Edgetic Gains
hsa00190:Oxidative phosphorylation	Edgetic Gains
hsa03420:Nucleotide excision repair	Edgetic Gains
hsa04114:Oocyte meiosis	Edgetic Gains
hsa03440:Homologous recombination	Edgetic Gains
hsa04622:RIG-I-like receptor signaling pathway	Edgetic Gains
hsa05016:Huntington's disease	Edgetic Gains
hsa00310:Lysine degradation	Edgetic Gains
hsa05323:Rheumatoid arthritis	Edgetic Gains
hsa03430:Mismatch repair	Edgetic Gains
hsa00051:Fructose and mannose metabolism	Edgetic Gains
hsa04370:VEGF signaling pathway	Edgetic Gains
hsa03030:DNA replication	Edgetic Gains
hsa04966:Collecting duct acid secretion	Edgetic Gains
hsa04730:Long-term depression	Edgetic Gains
hsa05416:Viral myocarditis	Edgetic Gains
hsa04960:Aldosterone-regulated sodium reabsorption	Edgetic Gains
hsa04330:Notch signaling pathway	Edgetic Gains
hsa04710:Circadian rhythm	Edgetic Gains
hsa04024:cAMP signaling pathway	Edgetic Losses
hsa04728:Dopaminergic synapse	Edgetic Losses
hsa04922:Glucagon signaling pathway	Edgetic Losses
hsa04022:cGMP-PKG signaling pathway	Edgetic Losses
hsa04261:Adrenergic signaling in cardiomyocytes	Edgetic Losses
hsa05031:Amphetamine addiction	Edgetic Losses
hsa05030:Cocaine addiction	Edgetic Losses
hsa00010:Glycolysis / Gluconeogenesis	Edgetic Losses
hsa00020:Citrate cycle (TCA cycle)	Edgetic Losses
hsa05020:Prion diseases	Edgetic Losses
hsa04923:Regulation of lipolysis in adipocytes	Edgetic Losses
hsa05410:Hypertrophic cardiomyopathy (HCM)	Edgetic Losses
hsa00970:Aminoacyl-tRNA biosynthesis	Edgetic Losses
hsa04340:Hedgehog signaling pathway	Edgetic Losses
hsa01200:Carbon metabolism	Edgetic Losses
hsa04720:Long-term potentiation	Edgetic Losses
hsa01130:Biosynthesis of antibiotics	Edgetic Losses
hsa01230:Biosynthesis of amino acids	Edgetic Losses
hsa03015:mRNA surveillance pathway	Edgetic Losses
hsa04921:Oxytocin signaling pathway	Edgetic Losses
hsa05414:Dilated cardiomyopathy	Edgetic Losses
hsa04713:Circadian entrainment	Edgetic Losses
hsa04725:Cholinergic synapse	Edgetic Losses
hsa04961:Endocrine and other factor-regulated calcium reabsorption	Edgetic Losses

## Sheet: Supplementary Table 2h
Supplementary Table vIh: Top 10 most rewired nodes per cancer type across 13 cancer types studied.
Cancer type	Top rewired nodes
THCA	Q9BVV2**, Q99666, Q8N8A2, P61371, P50549, P50222, Q9Y2A9, Q92608, Q8NCP5, Q5T2W1
BRCA	Q9NQL9, Q9HBJ0**, Q86YZ3, Q76N89, P78337, P48740, P19544, Q96FW1, P04629, P12882
BLCA	Q9HBJ0**, Q96RI1, Q96FV0, Q5VYV7, P61371, P09017, P02675, Q9BVV2**, Q8NEC5
KIRC	P09651, Q12906, P35222, O60341, P46379, P12931, Q13501, Q9BXN2, Q9BVV2**, Q8TBC3
KIRP	Q92905, Q96Q40, Q96AY2, Q86SE5, P35548, O95156, P00533, Q12933, Q9NQA5, Q8WXK1
LUSC	Q13547, P78362, Q9HBJ0**, Q96Q40, Q81YR6, Q5T7N2**, P19544, P12882, Q7Z3S9, Q96FW1
LIHC	Q96FW1, Q9HBJ0**, Q96AY2, Q86SE5, P54289, P18509, P49736, Q9Y577, Q8TAK6, Q8NEC5
PRAD	Q96Q40, Q5T7N2**, Q9NZM1, Q9ULJ8, Q9BXA6, P62913, P04637, Q69YH5, Q12988, P48668
STES	Q13616, Q96PN8, Q86YZ3, Q86W54, Q5VU13, Q16769, P50222, Q9NRD1, Q9NZM1, Q9H4K1
COAD	P38398, Q9HAT0, Q96PN8, Q86SE5, Q13224, O95661, A6NK59, Q93034, P22681, Q6UXL0
HNSC	Q9UQB9, Q9HBJ0**, Q8WXK1, Q81YR6, Q5T7N2**, Q5T2W1, P19544, P05814, Q13618, Q9ULJ8
LUAD	Q99666, Q76N89, Q5T7N2**, P16520, P04629, Q93034, Q9Y2A9, Q9BVV2**, Q8NB78, Q9BX46
KICH	P02751, Q9Y2A9, Q9BVV2**, Q99666, Q86SE5, Q76N89, Q5T7N2**, P50549, P11245, P06732
	** proteins involved in edgetic rewiring in at least 5 cancer types

## Sheet: Supplementary Table 2i
Supplementary Table vIi: Proteins involved in edgetic rewiring are associated with disease
Disease ID	Disease Description	GeneRatio	BgRatio	pvalue	p.adjust	geneID	Gene Count
umls:C0346163	Endometrioid carcinoma ovary	4/96	16/17381	1.51155350494143e-06	0.00315461216481276	1956/7157/1499/4488	4
umls:C1623038	Cirrhosis	12/96	389/17381	1.53269357944388e-06	0.00319873150029938	1788/10401/1956/2335/7157/2784/1499/4488/4171/8988/2904/10987	12
umls:C1112356	Bronchial dysplasia	3/96	6/17381	3.22674497401297e-06	0.00673421676076506	1956/7157/4171	3
umls:C1334708	Metaplastic breast carcinoma	3/96	6/17381	3.22674497401297e-06	0.00673421676076506	1956/7157/672	3
umls:C1336084	Squamous Lung Dysplasia	3/96	6/17381	3.22674497401297e-06	0.00673421676076506	1956/7157/4171	3
umls:C0684337	Ewings sarcoma-primitive neuroectodermal tumor (PNET)	6/96	76/17381	3.88135201787133e-06	0.00810038166129746	1956/4914/7157/7490/867/1499	6
umls:C1176475	Ductal Carcinoma	9/96	223/17381	3.95118161598546e-06	0.00824611603256165	8202/1956/2335/7157/6714/672/388697/9971/6795	9
umls:C0153579	Malignant neoplasm of fallopian tube	3/96	7/17381	5.62415431523111e-06	0.0117376100558873	1956/7157/672	3
umls:C0007133	Carcinoma, Papillary	9/96	233/17381	5.64475021310482e-06	0.0117805936947498	1956/2335/4914/7157/10/2784/672/3065/10987	9
umls:C0206629	Pulmonary Blastoma	3/96	8/17381	8.96256131165259e-06	0.018704865457419	1956/7157/1499	3
umls:C0035335	Retinoblastoma	12/96	472/17381	1.10600107878745e-05	0.023082242514294	1788/1956/4914/7157/6714/116/7490/1499/672/4171/3065/10987	12
umls:C0851135	In situ cancer	3/96	10/17381	1.90518165896038e-05	0.0397611412225031	1956/7157/8988	3
	The GeneRatio represents the number of genes from the input (query) gene list that match the GO term / Total number of the input (query) genes. The BgRatio represents the number of genes in the DisGeNET database associated with a disease-gene ID/ number of genes in the DisGeNET database.
