# Supplementary material for: Edgetic perturbation signatures represent known and novel cancer biomarkers
Source: Sci Rep. 2020 Mar 9;10:4350. doi: 10.1038/s41598-020-61422-3 (PMC7062722; doi:10.1038/s41598-020-61422-3)
Supplement: Supplementary file 8 — Table S7. [file 41598_2020_61422_MOESM8_ESM.xlsx]

## Sheet: pan-cancer gains
Supplementary Table VIIa: Edgetic gains observed in multiple cancer types
Protein1	Protein2	BLCA	BRCA	COAD	HNSC	KICH	KIRC	KIP	LIHC	LUAD	LUSC	PRAD	STES	THCS	MultiCanGained edges
Q9BZD4	Q9Y5B0	1	1	0	1	0	0	1	1	1	0	1	1	1	9
Q9BZD4	Q9Y496	1	1	0	1	0	0	1	1	1	0	1	1	1	9
Q9BZD4	Q9UNZ2	1	1	0	1	0	0	1	1	1	0	1	1	1	9
Q9BZD4	Q9UBW8	1	1	0	1	0	0	1	1	1	0	1	1	1	9
Q9BZD4	Q9NV70	1	1	0	1	0	0	1	1	1	0	1	1	1	9
Q9BZD4	Q9HBM1	1	1	0	1	0	0	1	1	1	0	1	1	1	9
Q9BZD4	Q9H410	1	1	0	1	0	0	1	1	1	0	1	1	1	9
Q9BZD4	Q9H3R5	1	1	0	1	0	0	1	1	1	0	1	1	1	9
Q9BZD4	Q9H190	1	1	0	1	0	0	1	1	1	0	1	1	1	9
Q9BZD4	Q9H081	1	1	0	1	0	0	1	1	1	0	1	1	1	9
Q99598	Q9BZD4	1	1	0	1	0	0	1	1	1	0	1	1	1	9
Q99459	Q9BZD4	1	1	0	1	0	0	1	1	1	0	1	1	1	9
Q96IY1	Q9BZD4	1	1	0	1	0	0	1	1	1	0	1	1	1	9
Q96EV8	Q9BZD4	1	1	0	1	0	0	1	1	1	0	1	1	1	9
Q8TAT5	Q9UJS0	1	1	0	0	1	1	1	1	1	1	0	1	0	9
Q8TAT5	Q9NZM4	1	1	0	0	1	1	1	1	1	1	0	1	0	9
Q8TAT5	Q9NXV6	1	1	0	1	1	1	1	0	1	1	0	1	0	9
Q8TAT5	Q9NPA8	1	1	0	0	1	1	1	1	1	1	0	1	0	9
Q8TAT5	Q96FZ2	1	1	0	0	1	1	1	1	1	1	0	1	0	9
Q8TAT5	Q8WUZ0	1	1	0	0	1	1	1	1	1	1	0	1	0	9
Q7Z2Z1	Q92547	0	1	0	0	1	1	1	1	1	1	1	0	1	9
Q6PCB5	Q8TAT5	1	1	0	0	1	1	1	1	1	1	0	1	0	9
Q6P1K2	Q9BZD4	1	1	0	1	0	0	1	1	1	0	1	1	1	9
Q5GLZ8	Q9BZD4	1	1	0	1	0	0	1	1	1	0	1	1	1	9
Q15154	Q9BZD4	1	1	0	1	0	0	1	1	1	0	1	1	1	9
Q14683	Q9BZD4	1	1	0	1	0	0	1	1	1	0	1	1	1	9
Q13464	Q8TAT5	1	1	0	0	1	1	1	1	1	1	0	1	0	9
Q13435	Q8TAT5	1	1	0	0	1	1	1	1	1	1	0	1	0	9
Q13427	Q9BZD4	1	1	0	1	0	0	1	1	1	0	1	1	1	9
Q13423	Q8TAT5	1	1	0	0	1	1	1	1	1	1	0	1	0	9
Q12872	Q8TAT5	1	1	0	0	1	1	1	1	1	1	0	1	0	9
Q02224	Q9BZD4	1	1	0	1	0	0	1	1	1	0	1	1	1	9
P52429	Q9BZD4	1	1	0	1	0	0	1	1	1	0	1	1	1	9
P51532	Q8TAT5	1	1	0	0	1	1	1	1	1	1	0	1	0	9
P49756	Q8TAT5	1	1	0	0	1	1	1	1	1	1	0	1	0	9
P49450	Q9NSP4	1	1	0	0	1	1	1	1	0	0	1	1	1	9
P49450	Q9BU64	1	1	0	0	1	1	1	1	0	0	1	1	1	9
P36873	Q9BZD4	1	1	0	1	0	0	1	1	1	0	1	1	1	9
P32019	Q9BZD4	1	1	0	1	0	0	1	1	1	0	1	1	1	9
P30307	Q92903	1	1	0	0	1	1	1	0	1	1	1	1	0	9
P23497	Q9BZD4	1	1	0	1	0	0	1	1	1	0	1	1	1	9
P20248	Q7Z2Z1	0	1	0	0	1	1	1	1	1	1	1	0	1	9
P11166	Q8TAT5	1	1	0	0	1	1	1	1	1	1	0	1	0	9
P10244	Q9BZD4	1	1	0	1	0	0	1	1	1	0	1	1	1	9
P05067	Q7Z2Z1	0	1	0	0	1	1	1	1	1	1	1	0	1	9
P04908	P49450	1	0	0	0	1	1	1	0	1	1	1	1	1	9
P04637	Q8TAT5	1	1	0	0	1	1	1	1	1	1	0	1	0	9
O95409	Q9UKB1	1	1	1	1	0	0	1	0	1	1	1	1	0	9
O95409	Q86T96	1	1	1	1	0	0	1	0	1	1	1	1	0	9
O95409	Q15717	1	1	1	1	0	0	1	0	1	1	1	1	0	9
O95409	Q15562	1	1	1	1	0	0	1	0	1	1	1	1	0	9
O95409	P10071	1	1	1	1	0	0	1	0	1	1	1	1	0	9
O95409	P10070	1	1	1	1	0	0	1	0	1	1	1	1	0	9
O95229	Q9BZD4	1	1	0	1	0	0	1	1	1	0	1	1	1	9
O75419	Q9Y5N6	1	1	0	0	0	1	1	1	1	1	0	1	1	9
O75419	Q9UBS0	1	1	0	0	0	1	1	1	1	1	0	1	1	9
O75419	Q9UBD5	1	1	0	0	0	1	1	1	1	1	0	1	1	9
O75419	Q9NTI5	1	1	0	0	0	1	1	1	1	1	0	1	1	9
O75419	Q9NRD1	1	1	0	0	0	1	1	1	1	1	0	1	1	9
O75419	Q92547	1	1	0	0	0	1	1	1	1	1	0	1	1	9
O75419	Q8TEA8	1	1	0	0	0	1	1	1	1	1	0	1	1	9
O75419	Q53EZ4	1	1	0	0	0	1	1	1	1	1	0	1	1	9
O75419	Q14566	1	1	0	0	0	1	1	1	1	1	0	1	1	9
O75419	Q13618	1	1	0	0	0	1	1	1	1	1	0	1	1	9
O75419	Q13416	1	1	0	0	0	1	1	1	1	1	0	1	1	9
O75419	P61163	1	1	0	0	0	1	1	1	1	1	0	1	1	9
O75419	P49959	1	1	0	0	0	1	1	1	1	1	0	1	1	9
O75419	P38936	1	1	0	0	0	1	1	1	1	1	0	1	1	9
O75419	P35251	1	1	0	0	0	1	1	1	1	1	0	1	1	9
O75419	P33993	1	1	0	0	0	1	1	1	1	1	0	1	1	9
O75419	P33991	1	1	0	0	0	1	1	1	1	1	0	1	1	9
O75419	P24941	1	1	0	0	0	1	1	1	1	1	0	1	1	9
O75419	P13500	1	1	0	0	0	1	1	1	1	1	0	1	1	9
O75419	P12004	1	1	0	0	0	1	1	1	1	1	0	1	1	9
O75419	P09884	1	1	0	0	0	1	1	1	1	1	0	1	1	9
O75400	Q8TAT5	1	1	0	0	1	1	1	1	1	1	0	1	0	9
O60566	Q9BZD4	1	1	0	1	0	0	1	1	1	0	1	1	1	9
O43913	O75419	1	1	0	0	0	1	1	1	1	1	0	1	1	9
O43683	Q9BZD4	1	1	0	1	0	0	1	1	1	0	1	1	1	9
O43617	O75419	1	1	0	0	0	1	1	1	1	1	0	1	1	9
O14965	Q9BZD4	1	1	0	1	0	0	1	1	1	0	1	1	1	9
O14777	Q9BZD4	1	1	0	1	0	0	1	1	1	0	1	1	1	9
Q9BR01	Q9NUX5	1	1	0	0	0	1	1	0	1	1	1	0	1	8
Q9BR01	Q9BZG8	1	1	0	0	0	1	1	0	1	1	1	0	1	8
Q9BQC3	Q9BR01	1	1	0	0	0	1	1	0	1	1	1	0	1	8
Q92826	Q9ULM2	0	1	1	0	1	1	1	1	1	1	0	0	0	8
Q92826	Q99496	0	1	1	0	1	1	1	1	1	1	0	0	0	8
Q8NG31	Q9BZD4	1	1	0	1	0	0	1	1	1	0	1	1	0	8
Q8N6S4	Q9BR01	1	1	0	0	0	1	1	0	1	1	1	0	1	8
Q8N143	Q9BR01	1	1	0	0	0	1	1	0	1	1	1	0	1	8
Q86Y91	Q9UKX7	1	1	0	0	0	1	1	1	0	0	1	1	1	8
Q86Y91	Q9UBU9	1	1	0	0	0	1	1	1	0	0	1	1	1	8
Q86Y91	Q9HCE1	1	1	0	0	0	1	1	1	0	0	1	1	1	8
Q15691	Q86Y91	1	1	0	0	0	1	1	1	0	0	1	1	1	8
Q15672	Q8TAT5	1	1	0	0	1	1	1	0	1	1	0	1	0	8
Q15562	Q92826	0	1	1	0	1	1	1	1	1	1	0	0	0	8
Q15306	Q92826	0	1	1	0	1	1	1	1	1	1	0	0	0	8
Q12815	Q9Y463	1	1	0	1	0	1	1	1	0	1	0	1	0	8
Q12815	Q9Y2I6	1	1	0	1	0	1	1	1	0	1	0	1	0	8
Q12815	Q9UPY8	1	1	0	1	0	1	1	1	0	1	0	1	0	8
Q12815	Q8N9N5	1	1	0	1	0	1	1	1	0	1	0	1	0	8
Q12815	Q8N0Z3	1	1	0	1	0	1	1	1	0	1	0	1	0	8
Q12815	Q8IV13	1	1	0	1	0	1	1	1	0	1	0	1	0	8
Q12815	Q15717	1	1	0	1	0	1	1	1	0	1	0	1	0	8
Q12815	Q15691	1	1	0	1	0	1	1	1	0	1	0	1	0	8
Q12815	Q13895	1	1	0	1	0	1	1	1	0	1	0	1	0	8
Q12815	Q13627	1	1	0	1	0	1	1	1	0	1	0	1	0	8
Q12815	Q13114	1	1	0	1	0	1	1	1	0	1	0	1	0	8
Q12815	Q12933	1	1	0	1	0	1	1	1	0	1	0	1	0	8
Q12815	Q12816	1	1	0	1	0	1	1	1	0	1	0	1	0	8
Q08379	Q8NCX0	1	1	1	1	0	0	0	0	1	1	0	1	1	8
Q00610	Q12815	1	1	0	1	0	1	1	1	0	1	0	1	0	8
P68431	Q86Y91	1	1	0	0	0	1	1	1	1	0	1	1	0	8
P62807	Q86Y91	1	1	0	0	0	1	1	1	0	0	1	1	1	8
P62140	Q86Y91	1	1	0	0	0	1	1	1	0	0	1	1	1	8
P49450	Q8NCD3	1	0	0	0	1	1	1	1	0	0	1	1	1	8
P49450	P68431	1	1	0	0	0	1	1	1	1	0	1	1	0	8
P49356	Q12815	1	1	0	1	0	1	1	1	0	1	0	1	0	8
P48645	Q9NU53	1	1	0	1	0	1	1	0	1	1	0	1	0	8
P48645	Q7Z3S9	1	1	0	1	0	1	1	0	1	1	0	1	0	8
P48645	Q63HR2	1	1	0	1	0	1	1	0	1	1	0	1	0	8
P48645	Q13424	1	1	0	1	0	1	1	0	1	1	0	1	0	8
P37198	Q8NCX0	1	1	1	1	0	0	0	0	1	1	0	1	1	8
P36406	Q12815	1	1	0	1	0	1	1	1	0	1	0	1	0	8
P32242	Q9UKJ5	1	0	1	0	1	0	1	0	1	1	1	1	0	8
P32242	Q9C005	1	0	1	0	1	0	1	0	1	1	1	1	0	8
P32242	Q99750	1	0	1	0	1	0	1	0	1	1	1	1	0	8
P32242	Q93062	1	0	1	0	1	0	1	0	1	1	1	1	0	8
P32242	Q92922	1	0	1	0	1	0	1	0	1	1	1	1	0	8
P32242	Q6UY14	1	0	1	0	1	0	1	0	1	1	1	1	0	8
P32242	Q01844	1	0	1	0	1	0	1	0	1	1	1	1	0	8
P31749	Q9BR01	1	1	0	0	0	1	1	0	1	1	1	0	1	8
P31273	P56178	1	1	0	1	0	1	1	1	1	1	0	0	0	8
P30307	Q8IWQ3	1	1	1	1	1	0	1	0	1	0	1	0	0	8
P28799	P32242	1	0	1	0	1	0	1	0	1	1	1	1	0	8
P23677	Q9NZM3	1	1	0	0	1	1	1	0	1	1	0	0	1	8
P23677	Q16643	1	1	0	0	1	1	1	0	1	1	0	0	1	8
P20036	P48645	1	1	0	1	0	1	1	0	1	1	0	1	0	8
P19429	Q9UKA8	1	1	1	0	1	0	1	0	1	0	0	1	1	8
P19429	Q99698	1	1	1	0	1	0	1	0	1	0	0	1	1	8
P19429	Q92667	1	1	1	0	1	0	1	0	1	0	0	1	1	8
P19429	Q16082	1	1	1	0	1	0	1	0	1	0	0	1	1	8
P19429	Q13563	1	1	1	0	1	0	1	0	1	0	0	1	1	8
P19429	Q06945	1	1	1	0	1	0	1	0	1	0	0	1	1	8
P19429	P62195	1	1	1	0	1	0	1	0	1	0	0	1	1	8
P19419	Q92826	0	1	1	0	1	1	1	1	1	1	0	0	0	8
P12107	Q6PCT2	1	0	1	1	0	0	1	0	0	1	1	1	1	8
P06493	Q99640	1	1	0	0	1	0	1	1	1	1	0	1	0	8
P05787	Q12815	1	1	0	1	0	1	1	1	0	1	0	1	0	8
O95409	P08151	1	1	1	0	0	0	1	0	1	1	1	1	0	8
O94822	Q86Y91	1	1	0	0	0	1	1	1	0	0	1	1	1	8
O75752	P48645	1	1	0	1	0	1	1	0	1	1	0	1	0	8
O75530	Q92826	0	1	1	0	1	1	1	1	1	1	0	0	0	8
O75419	Q9Y468	1	0	0	0	0	1	1	1	1	1	0	1	1	8
O75419	Q8N726	1	1	0	0	0	1	1	1	1	1	0	1	0	8
O43638	Q92826	0	1	1	0	1	1	1	1	1	1	0	0	0	8
O43609	P32242	1	0	1	0	1	0	1	0	1	1	1	1	0	8
O43597	P32242	1	0	1	0	1	0	1	0	1	1	1	1	0	8
O15350	Q9NZI8	1	0	0	1	1	1	1	0	1	1	0	1	0	8
O14829	P62158	0	1	0	1	0	1	1	0	1	1	1	0	1	8
Q9HBM1	Q9UBC2	0	1	0	0	0	1	1	1	0	0	1	1	1	7
Q9H492	Q9ULW8	1	1	1	0	0	1	0	1	1	1	0	0	0	7
Q9H410	Q9HBM1	0	1	0	0	0	1	1	1	0	0	1	1	1	7
Q9H081	Q9HBM1	0	1	0	0	0	1	1	1	0	0	1	1	1	7
Q9C0C2	Q9HBM1	0	1	0	0	0	1	1	1	0	0	1	1	1	7
Q99640	Q9P0N5	0	1	0	0	1	0	1	1	1	1	0	1	0	7
Q99417	Q9P2K9	1	1	0	1	0	1	1	0	1	0	1	0	0	7
Q96T76	Q9HBM1	0	1	0	0	0	1	1	1	0	0	1	1	1	7
Q96IY1	Q9HBM1	0	1	0	0	0	1	1	1	0	0	1	1	1	7
Q96H22	Q9NSP4	1	1	0	0	0	1	0	1	0	0	1	1	1	7
Q96GM5	Q9ULW8	1	1	1	0	0	1	0	1	1	1	0	0	0	7
Q96C57	Q9HBM1	0	1	0	0	0	1	1	1	0	0	1	1	1	7
Q92674	Q9NSP4	1	0	1	0	0	1	1	0	1	1	0	0	1	7
Q92674	Q9H3R5	1	0	1	0	0	1	1	0	1	1	0	0	1	7
Q92674	Q9BU64	1	0	1	0	0	1	1	0	1	1	0	0	1	7
Q92674	Q96H22	1	0	1	0	0	1	1	0	1	1	0	0	1	7
Q92614	Q9HBM1	0	1	0	0	0	1	1	1	0	0	1	1	1	7
Q8WYN0	Q9BZD4	1	1	0	1	0	0	1	0	1	0	0	1	1	7
Q8WXH2	Q9Y6E0	1	1	0	1	1	0	1	0	1	0	0	0	1	7
Q8TE85	Q9NZI5	1	1	1	0	0	0	0	0	1	1	0	1	1	7
Q8TE85	Q99873	1	1	1	0	0	0	0	0	1	1	0	1	1	7
Q8TE85	Q96LA8	1	1	1	0	0	0	0	0	1	1	0	1	1	7
Q8TBB1	Q96S95	1	1	0	0	0	1	1	0	1	1	0	0	1	7
Q8TB24	Q96DZ7	1	0	1	0	1	1	1	0	1	0	1	0	0	7
Q8TAI1	Q99750	0	1	1	1	0	0	0	0	0	1	1	1	1	7
Q8NI27	Q99640	0	1	0	0	1	0	1	1	1	1	0	1	0	7
Q8NG31	Q9HBM1	1	1	0	0	0	1	1	1	0	0	1	1	0	7
Q8NDV3	Q9UQE7	1	1	0	1	1	0	0	0	1	1	0	0	1	7
Q8NDV3	Q96FF9	1	1	0	1	1	0	0	0	1	1	0	0	1	7
Q8NDV3	Q8WVM7	1	1	0	1	1	0	0	0	1	1	0	0	1	7
Q8NCD3	Q96FV0	1	1	0	0	1	1	1	1	0	0	0	0	1	7
Q8N3U4	Q8NDV3	1	1	0	1	1	0	0	0	1	1	0	0	1	7
Q8IWJ2	Q9HBM1	0	1	0	0	0	1	1	1	0	0	1	1	1	7
Q86UP2	Q9HBM1	0	1	0	0	0	1	1	1	0	0	1	1	1	7
Q7Z4V5	Q9HBM1	0	1	0	0	0	1	1	1	0	0	1	1	1	7
Q7LDG7	Q9P2K9	1	1	0	1	0	1	1	0	1	0	1	0	0	7
Q7L590	Q9Y6K9	1	1	0	0	1	1	1	0	0	1	0	1	0	7
Q7L590	Q9Y6I9	1	1	0	0	1	1	1	0	0	1	0	1	0	7
Q7L590	Q9Y4B6	1	1	0	0	1	1	1	0	0	1	0	1	0	7
Q7L590	Q9Y2I6	1	1	0	0	1	1	1	0	0	1	0	1	0	7
Q7L590	Q9UBD5	1	1	0	0	1	1	1	0	0	1	0	1	0	7
Q7L590	Q9P209	1	1	0	0	1	1	1	0	0	1	0	1	0	7
Q7L590	Q9BWH6	1	1	0	0	1	1	1	0	0	1	0	1	0	7
Q7L590	Q9BTE3	1	1	0	0	1	1	1	0	0	1	0	1	0	7
Q7L590	Q99741	1	1	0	0	1	1	1	0	0	1	0	1	0	7
Q7L590	Q99459	1	1	0	0	1	1	1	0	0	1	0	1	0	7
Q7L590	Q96ED9	1	1	0	0	1	1	1	0	0	1	0	1	0	7
Q7L590	Q96EB6	1	1	0	0	1	1	1	0	0	1	0	1	0	7
Q7L590	Q96BR9	1	1	0	0	1	1	1	0	0	1	0	1	0	7
Q7L590	Q8WVE6	1	0	0	0	1	1	1	0	1	1	0	1	0	7
Q7L590	Q8NHQ1	1	1	0	0	1	1	1	0	0	1	0	1	0	7
Q7L590	Q86T82	1	1	0	0	1	1	1	0	0	1	0	1	0	7
Q7L2Z9	Q9NSP4	1	1	0	0	0	1	0	1	0	0	1	1	1	7
Q7L2Z9	Q92674	1	0	1	0	0	1	1	0	1	1	0	0	1	7
Q71F23	Q9NSP4	1	1	0	0	0	1	0	1	0	0	1	1	1	7
Q71F23	Q92674	1	0	1	0	0	1	1	0	1	1	0	0	1	7
Q6P1K2	Q9HBM1	0	1	0	0	0	1	1	1	0	0	1	1	1	7
Q6ISB3	Q8TE85	1	1	1	0	0	0	0	0	1	1	0	1	1	7
Q69YQ0	Q9HBM1	0	1	0	0	0	1	1	1	0	0	1	1	1	7
Q676U5	Q9HBM1	0	1	0	0	0	1	1	1	0	0	1	1	1	7
Q658P3	Q99640	0	1	0	0	1	0	1	1	1	1	0	1	0	7
Q63HR2	Q96DZ7	1	0	1	0	1	1	1	0	1	0	1	0	0	7
Q5JRA6	Q96PQ1	1	0	0	1	1	1	1	0	0	0	1	1	0	7
Q5FBB7	Q9UQN3	1	0	0	0	0	1	1	0	1	1	1	1	0	7
Q5FBB7	Q9UPZ3	1	0	0	0	0	1	1	0	1	1	1	1	0	7
Q5FBB7	Q9UHV9	1	0	0	0	0	1	1	0	1	1	1	1	0	7
Q5FBB7	Q9UBC3	1	0	0	0	0	1	1	0	1	1	1	1	0	7
Q5FBB7	Q9P2X3	1	0	0	0	0	1	1	0	1	1	1	1	0	7
Q5FBB7	Q9NRR4	1	0	0	0	0	1	1	0	1	1	1	1	0	7
Q5FBB7	Q9NQS7	1	0	0	0	0	1	1	0	1	1	1	1	0	7
Q5FBB7	Q9H6R7	1	0	0	0	0	1	1	0	1	1	1	1	0	7
Q5FBB7	Q9H5H4	1	0	0	0	0	1	1	0	1	1	1	1	0	7
Q5FBB7	Q99729	1	0	0	0	0	1	1	0	1	1	1	1	0	7
Q5FBB7	Q99661	1	0	0	0	0	1	1	0	1	1	1	1	0	7
Q5FBB7	Q96IY1	1	0	0	0	0	1	1	0	1	1	1	1	0	7
Q5FBB7	Q8WYB5	1	0	0	0	0	1	1	0	1	1	1	1	0	7
Q5FBB7	Q8TDY2	1	0	0	0	0	1	1	0	1	1	1	1	0	7
Q5FBB7	Q8N4N3	1	0	0	0	0	1	1	0	1	1	1	1	0	7
Q5FBB7	Q8IWV8	1	0	0	0	0	1	1	0	1	1	1	1	0	7
Q5FBB7	Q86WJ1	1	0	0	0	0	1	1	0	1	1	1	1	0	7
Q5FBB7	Q7KZ85	1	0	0	0	0	1	1	0	1	1	1	1	0	7
Q562F6	Q9ULW8	1	1	1	0	0	1	0	1	1	1	0	0	0	7
Q53HL2	Q5FBB7	1	0	0	0	0	1	1	0	1	1	1	1	0	7
Q49A88	Q7L590	1	1	0	0	1	1	1	0	0	1	0	1	0	7
Q16667	Q9Y6Q9	1	1	0	0	0	1	1	1	1	1	0	0	0	7
Q16531	Q7L590	1	1	0	0	1	1	1	0	0	1	0	1	0	7
Q15907	Q9ULW8	1	1	1	0	0	1	0	1	1	1	0	0	0	7
Q15834	Q7L590	1	1	0	0	1	1	1	0	0	1	0	1	0	7
Q15717	Q9UJQ4	1	1	1	0	0	0	1	0	1	1	0	1	0	7
Q15717	Q5FBB7	1	0	0	0	0	1	1	0	1	1	1	1	0	7
Q15369	Q5FBB7	1	0	0	0	0	1	1	0	1	1	1	1	0	7
Q15154	Q7L590	1	1	0	0	1	1	1	0	0	1	0	1	0	7
Q15058	Q9HC77	0	1	0	0	1	1	1	0	0	0	1	1	1	7
Q15025	Q7L590	1	1	0	0	1	1	1	0	0	1	0	1	0	7
Q14566	Q7L590	1	1	0	0	1	1	1	0	0	1	0	1	0	7
Q13619	Q7L590	1	1	0	0	1	1	1	0	0	1	0	1	0	7
Q13526	Q99640	0	1	0	0	1	0	1	1	1	1	0	1	0	7
Q13416	Q7L590	1	1	0	0	1	1	1	0	0	1	0	1	0	7
Q13137	Q7L590	1	1	0	0	1	1	1	0	0	1	0	1	0	7
Q13123	Q9BWT6	0	0	0	0	1	0	1	1	1	1	1	0	1	7
Q13011	Q5FBB7	1	0	0	0	0	1	1	0	1	1	1	1	0	7
Q12946	Q92826	0	0	1	0	1	1	1	1	1	1	0	0	0	7
Q12926	Q99729	1	1	0	0	0	0	1	0	1	1	1	0	1	7
Q12926	Q8NAP3	1	1	0	0	0	0	1	0	1	1	1	0	1	7
Q12926	Q8IXZ2	1	1	0	0	0	0	1	0	1	1	1	0	1	7
Q12926	Q86VP6	1	1	0	0	0	0	1	0	1	1	1	0	1	7
Q12926	Q13618	1	1	0	0	0	0	1	0	1	1	1	0	1	7
Q12926	Q13595	1	1	0	0	0	0	1	0	1	1	1	0	1	7
Q12926	Q13148	1	1	0	0	0	0	1	0	1	1	1	0	1	7
Q12905	Q12926	1	1	0	0	0	0	1	0	1	1	1	0	1	7
Q0VG99	Q99081	1	0	0	0	0	0	1	1	1	0	1	1	1	7
Q0JRZ9	Q9HBM1	0	1	0	0	0	1	1	1	0	0	1	1	1	7
Q08379	Q7L590	1	1	0	0	1	1	1	0	0	1	0	1	0	7
Q06609	Q5FBB7	1	0	0	0	0	1	1	0	1	1	1	1	0	7
Q04724	Q05925	1	0	0	0	1	1	1	1	0	1	0	0	1	7
Q03188	Q9NSP4	1	1	0	0	0	1	0	1	0	0	1	1	1	7
Q01860	Q96T25	1	0	1	0	0	0	1	1	1	0	1	1	0	7
Q01105	Q5FBB7	1	0	0	0	0	1	1	0	1	1	1	1	0	7
Q00534	Q7L590	1	1	0	0	1	1	1	0	0	1	0	1	0	7
P68431	Q96AV8	1	1	0	1	0	0	1	1	1	0	0	1	0	7
P68431	Q8TF76	1	1	0	0	0	1	1	0	1	0	1	1	0	7
P68431	Q69YH5	1	1	0	0	0	0	1	1	1	0	1	1	0	7
P67775	Q5FBB7	1	0	0	0	0	1	1	0	1	1	1	1	0	7
P62877	Q7L590	1	1	0	0	1	1	1	0	0	1	0	1	0	7
P62807	Q7L590	1	1	0	0	1	1	1	0	0	1	0	1	0	7
P62807	Q5FBB7	1	0	0	0	0	1	1	0	1	1	1	1	0	7
P62805	P78395	0	0	0	0	0	1	1	0	1	1	1	1	1	7
P62714	Q5FBB7	1	0	0	0	0	1	1	0	1	1	1	1	0	7
P62487	Q7L590	1	1	0	0	1	1	1	0	0	1	0	1	0	7
P62310	Q92988	1	1	0	0	1	1	1	0	0	0	0	1	1	7
P62258	Q7L590	1	1	0	0	1	1	1	0	0	1	0	1	0	7
P62136	Q8WXH2	1	1	0	1	1	0	1	0	1	0	0	0	1	7
P60484	Q99640	0	1	0	0	1	0	1	1	1	1	0	1	0	7
P60468	Q9HBM1	0	1	0	0	0	1	1	1	0	0	1	1	1	7
P56282	Q96FV0	1	1	0	0	0	0	1	1	1	1	0	0	1	7
P56178	Q9P0K8	1	1	0	0	0	1	1	1	1	1	0	0	0	7
P56178	Q15562	1	1	0	0	0	1	1	1	1	1	0	0	0	7
P56178	Q12948	1	1	0	0	0	1	1	1	1	1	0	0	0	7
P56178	Q12778	1	1	0	0	0	1	1	1	1	1	0	0	0	7
P56178	Q06330	1	1	0	0	0	1	1	1	1	1	0	0	0	7
P55317	P56178	1	1	0	0	0	0	1	1	1	1	0	0	1	7
P53634	Q5FBB7	1	0	0	0	0	1	1	0	1	1	1	1	0	7
P53350	Q5FBB7	1	0	0	0	0	1	1	0	1	1	1	1	0	7
P50222	Q8IW36	1	1	0	0	0	0	1	0	1	1	0	1	1	7
P49736	Q7L590	1	1	0	0	1	1	1	0	0	1	0	1	0	7
P49450	Q9Y5B9	0	0	0	0	1	1	1	1	0	0	1	1	1	7
P49450	Q9Y265	0	0	0	0	1	1	1	1	0	0	1	1	1	7
P49450	Q9Y230	0	0	0	0	1	1	1	1	0	0	1	1	1	7
P49450	Q9P2M4	0	0	0	0	1	1	1	1	0	0	1	1	1	7
P49450	Q9HC52	0	0	0	0	1	1	1	1	0	0	1	1	1	7
P49450	Q9HBH1	0	0	0	0	1	1	1	1	0	0	1	1	1	7
P49450	Q9H3R5	0	0	0	0	1	1	1	1	0	0	1	1	1	7
P49450	Q9BXP5	0	0	0	0	1	1	1	1	0	0	1	1	1	7
P49450	Q9BS16	1	1	0	0	0	1	1	0	0	1	1	1	0	7
P49450	Q99627	0	0	0	0	1	1	1	1	0	0	1	1	1	7
P49450	Q99496	0	0	0	0	1	1	1	1	0	0	1	1	1	7
P49450	Q96T23	0	0	0	0	1	1	1	1	0	0	1	1	1	7
P49450	Q96JP5	0	0	0	0	1	1	1	1	0	0	1	1	1	7
P49450	Q96H22	0	0	0	0	1	1	1	1	0	0	1	1	1	7
P49450	Q96EU6	0	0	0	0	1	1	1	1	0	0	1	1	1	7
P49450	Q96BT3	0	0	0	0	1	1	1	1	0	0	1	1	1	7
P49450	Q92674	1	0	1	0	0	1	1	0	1	1	0	0	1	7
P49450	Q92552	0	0	0	0	1	1	1	1	0	0	1	1	1	7
P49450	Q8WWQ0	0	0	0	0	1	1	1	1	0	0	1	1	1	7
P49450	Q8NEM2	0	0	0	0	1	1	1	1	0	0	1	1	1	7
P49450	Q71F23	0	0	0	0	1	1	1	1	0	0	1	1	1	7
P49450	Q6P161	0	0	0	0	1	1	1	1	0	0	1	1	1	7
P49450	Q69YN4	0	0	0	0	1	1	1	1	0	0	1	1	1	7
P49450	Q5T200	0	0	0	0	1	1	1	1	0	0	1	1	1	7
P49450	Q16778	0	0	0	0	1	1	1	1	0	0	1	1	1	7
P49450	Q16531	0	0	0	0	1	1	1	1	0	0	1	1	1	7
P49450	Q15007	0	0	0	0	1	1	1	1	0	0	1	1	1	7
P49450	Q13619	0	0	0	0	1	1	1	1	0	0	1	1	1	7
P49450	Q13185	0	0	0	0	1	1	1	1	0	0	1	1	1	7
P49450	Q08945	0	0	0	0	1	1	1	1	0	0	1	1	1	7
P49450	Q06587	0	0	0	0	1	1	1	1	0	0	1	1	1	7
P49450	Q03188	0	0	0	0	1	1	1	1	0	0	1	1	1	7
P49450	Q02241	0	0	0	0	1	1	1	1	0	0	1	1	1	7
P49450	Q00839	0	0	0	0	1	1	1	1	0	0	1	1	1	7
P49450	P84243	0	0	0	0	1	1	1	1	0	0	1	1	1	7
P49450	P60709	0	0	0	0	1	1	1	1	0	0	1	1	1	7
P49450	P50750	0	0	0	0	1	1	1	1	0	0	1	1	1	7
P49406	P49450	0	0	0	0	1	1	1	1	0	0	1	1	1	7
P46736	P49450	0	0	0	0	1	1	1	1	0	0	1	1	1	7
P46108	Q96DZ7	1	0	1	0	1	1	1	0	1	0	1	0	0	7
P45973	Q5FBB7	1	0	0	0	0	1	1	0	1	1	1	1	0	7
P45452	Q96GW7	1	0	1	1	1	0	0	0	1	1	0	1	0	7
P42704	Q9HBM1	0	1	0	0	0	1	1	1	0	0	1	1	1	7
P42566	Q9HBM1	0	1	0	0	0	1	1	1	0	0	1	1	1	7
P40763	Q96DZ7	1	0	1	0	1	1	1	0	1	0	1	0	0	7
P38936	Q7L590	1	1	0	0	1	1	1	0	0	1	0	1	0	7
P38159	Q12926	1	1	0	0	0	0	1	0	1	1	1	0	1	7
P36941	Q9HBM1	0	1	0	0	0	1	1	1	0	0	1	1	1	7
P35548	P56178	1	1	0	0	0	1	1	1	1	1	0	0	0	7
P35226	Q12926	1	1	0	0	0	0	1	0	1	1	1	0	1	7
P35226	P49450	0	0	0	0	1	1	1	1	0	0	1	1	1	7
P33993	Q7L590	1	1	0	0	1	1	1	0	0	1	0	1	0	7
P33991	Q7L590	1	1	0	0	1	1	1	0	0	1	0	1	0	7
P32121	Q9NSP4	1	1	0	0	0	1	0	1	0	0	1	1	1	7
P31276	Q9P0K8	1	0	0	1	1	0	1	0	1	1	0	1	0	7
P31276	Q9BZS1	1	0	0	1	1	0	1	0	1	1	0	1	0	7
P31276	Q99729	1	0	0	1	1	0	1	0	1	1	0	1	0	7
P31276	Q12948	1	0	0	1	1	0	1	0	1	1	0	1	0	7
P31276	Q06330	1	0	0	1	1	0	1	0	1	1	0	1	0	7
P31276	P32519	1	0	0	1	1	0	1	0	1	1	0	1	0	7
P31274	Q12926	1	1	0	1	0	0	1	0	1	1	0	0	1	7
P31274	P31276	1	0	0	1	1	0	1	0	1	1	0	1	0	7
P30837	Q5FBB7	1	0	0	0	0	1	1	0	1	1	1	1	0	7
P30281	Q7L590	1	1	0	0	1	1	1	0	0	1	0	1	0	7
P30153	Q5FBB7	1	0	0	0	0	1	1	0	1	1	1	1	0	7
P28360	P56178	1	1	0	0	0	1	1	1	1	1	0	0	0	7
P27695	P31276	1	0	0	1	1	0	1	0	1	1	0	1	0	7
P27694	P49450	0	0	0	0	1	1	1	1	0	0	1	1	1	7
P26367	Q05925	1	0	0	0	1	1	1	1	0	1	0	0	1	7
P24941	Q16667	1	1	0	0	0	1	1	1	1	1	0	0	0	7
P24941	Q12926	1	1	0	0	0	0	1	0	1	1	1	0	1	7
P24385	Q7L590	1	1	0	0	1	1	1	0	0	1	0	1	0	7
P22087	P49450	0	0	0	0	1	1	1	1	0	0	1	1	1	7
P21810	Q8WXH2	1	1	0	1	1	0	1	0	1	0	0	0	1	7
P20248	Q99640	0	1	0	0	1	0	1	1	1	1	0	1	0	7
P19429	P63316	1	0	1	0	1	0	1	0	1	0	0	1	1	7
P17844	P49450	0	0	0	0	1	1	1	1	0	0	1	1	1	7
P16403	P49450	0	0	0	0	1	1	1	1	0	0	1	1	1	7
P16104	P49450	0	0	0	0	1	1	1	1	0	0	1	1	1	7
P15923	Q0VG99	1	0	0	0	0	0	1	1	1	0	1	1	1	7
P14635	Q99640	0	1	0	0	1	0	1	1	1	1	0	1	0	7
P13010	P49450	0	0	0	0	1	1	1	1	0	0	1	1	1	7
P11142	P49450	0	0	0	0	1	1	1	1	0	0	1	1	1	7
P10242	Q9Y4K3	1	1	0	0	1	1	1	0	0	0	1	1	0	7
P10242	Q9UJU2	1	1	0	0	1	1	1	0	0	0	1	1	0	7
P10242	Q9UBL3	1	1	0	0	1	1	1	0	0	0	1	1	0	7
P10242	Q9UBE8	1	1	0	0	1	1	1	0	0	0	1	1	0	7
P10242	Q9HAU5	1	1	0	0	1	1	1	0	0	0	1	1	0	7
P10242	Q9H2X6	1	1	0	0	1	1	1	0	0	0	1	1	0	7
P10242	Q96ST3	1	1	0	0	1	1	1	0	0	0	1	1	0	7
P10242	Q969H0	1	1	0	0	1	1	1	0	0	0	1	1	0	7
P10242	Q92993	1	1	0	0	1	1	1	0	0	0	1	1	0	7
P10242	Q92831	1	1	0	0	1	1	1	0	0	0	1	1	0	7
P10242	Q92830	1	1	0	0	1	1	1	0	0	0	1	1	0	7
P10242	Q92793	1	1	0	0	1	1	1	0	0	0	1	1	0	7
P10242	Q7KZF4	1	1	0	0	1	1	1	0	0	0	1	1	0	7
P10242	Q16534	1	1	0	0	1	1	1	0	0	0	1	1	0	7
P10242	Q16531	1	1	0	0	1	1	1	0	0	0	1	1	0	7
P10242	Q15326	1	1	0	0	1	1	1	0	0	0	1	1	0	7
P10242	Q15291	1	1	0	0	1	1	1	0	0	0	1	1	0	7
P10242	Q13619	1	1	0	0	1	1	1	0	0	0	1	1	0	7
P10242	Q13263	1	1	0	0	1	1	1	0	0	0	1	1	0	7
P10242	Q12873	1	1	0	0	1	1	1	0	0	0	1	1	0	7
P10242	Q09472	1	1	0	0	1	1	1	0	0	0	1	1	0	7
P10242	Q03164	1	1	0	0	1	1	1	0	0	0	1	1	0	7
P10242	P63279	1	1	0	0	1	1	1	0	0	0	1	1	0	7
P10242	P63165	1	1	0	0	1	1	1	0	0	0	1	1	0	7
P10242	P62877	1	1	0	0	1	1	1	0	0	0	1	1	0	7
P10242	P61964	1	1	0	0	1	1	1	0	0	0	1	1	0	7
P10242	P61956	1	1	0	0	1	1	1	0	0	0	1	1	0	7
P10242	P51531	1	1	0	0	1	1	1	0	0	0	1	1	0	7
P10242	P42229	1	1	0	0	1	1	1	0	0	0	1	1	0	7
P10242	P36578	1	1	0	0	1	1	1	0	0	0	1	1	0	7
P10242	P30281	1	1	0	0	1	1	1	0	0	0	1	1	0	7
P10242	P29590	1	1	0	0	1	1	1	0	0	0	1	1	0	7
P10242	P23771	1	1	0	0	1	1	1	0	0	0	1	1	0	7
P10242	P19338	1	1	0	0	1	1	1	0	0	0	1	1	0	7
P10242	P17676	1	1	0	0	1	1	1	0	0	0	1	1	0	7
P10242	P12755	1	1	0	0	1	1	1	0	0	0	1	1	0	7
P09874	P49450	0	0	0	0	1	1	1	1	0	0	1	1	1	7
P09874	P10242	1	1	0	0	1	1	1	0	0	0	1	1	0	7
P09630	Q12913	1	0	0	1	0	0	0	1	0	1	1	1	1	7
P09630	P25054	1	0	0	1	0	0	0	1	0	1	1	1	1	7
P09630	P21802	1	0	0	1	0	0	0	1	0	1	1	1	1	7
P09429	P09630	1	0	0	1	0	0	0	1	0	1	1	1	1	7
P09228	Q96D96	1	1	1	0	0	0	1	0	0	0	1	1	1	7
P09228	Q7Z3S9	1	1	1	0	0	0	1	0	0	0	1	1	1	7
P09228	Q6UY14	1	1	1	0	0	0	1	0	0	0	1	1	1	7
P09228	Q14206	1	1	1	0	0	0	1	0	0	0	1	1	1	7
P09228	Q00403	1	1	1	0	0	0	1	0	0	0	1	1	1	7
P09228	P55851	1	1	1	0	0	0	1	0	0	0	1	1	1	7
P09228	P25788	1	1	1	0	0	0	1	0	0	0	1	1	1	7
P09001	P49450	0	0	0	0	1	1	1	1	0	0	1	1	1	7
P08069	P09630	1	0	0	1	0	0	0	1	0	1	1	1	1	7
P07199	P49450	0	0	0	0	1	1	1	1	0	0	1	1	1	7
P06748	P49450	0	0	0	0	1	1	1	1	0	0	1	1	1	7
P06493	Q16667	1	1	0	0	0	1	1	1	1	1	0	0	0	7
P06493	Q15398	1	1	0	0	0	1	1	1	0	0	1	0	1	7
P05067	Q9BWT6	0	0	0	0	1	0	1	1	1	1	1	0	1	7
P05067	Q92674	1	0	1	0	0	1	1	0	1	1	0	0	1	7
P05067	Q7L590	1	1	0	0	1	1	1	0	0	1	0	1	0	7
P05067	P09630	1	0	0	1	0	0	0	1	0	1	1	1	1	7
P05067	P09228	1	1	1	0	0	0	1	0	0	0	1	1	1	7
P04637	P49450	0	0	0	0	1	1	1	1	0	0	1	1	1	7
P03971	Q9NVJ2	1	1	1	0	0	0	1	0	0	0	1	1	1	7
P03971	Q96NC0	1	1	1	0	0	0	1	0	0	0	1	1	1	7
P03971	Q92905	1	1	1	0	0	0	1	0	0	0	1	1	1	7
P03971	P41161	1	1	1	0	0	0	1	0	0	0	1	1	1	7
P01137	P09630	1	0	0	1	0	0	0	1	0	1	1	1	1	7
P01037	Q96D96	1	1	1	0	0	0	1	0	1	0	0	1	1	7
P01037	Q8WUN7	1	1	1	0	0	0	1	0	1	0	0	1	1	7
P01037	Q00403	1	1	1	0	0	0	1	0	1	0	0	1	1	7
P00558	P49450	0	0	0	0	1	1	1	1	0	0	1	1	1	7
O96017	P09630	1	0	0	1	0	0	0	1	0	1	1	1	1	7
O95817	Q8TDF5	1	1	0	1	1	1	0	0	1	1	0	0	0	7
O95782	Q9HBM1	0	1	0	0	0	1	1	1	0	0	1	1	1	7
O95721	Q9HBM1	0	1	0	0	0	1	1	1	0	0	1	1	1	7
O95229	Q9HBM1	0	1	0	0	0	1	1	1	0	0	1	1	1	7
O95158	Q7L0Q8	1	0	1	0	0	0	0	0	1	1	1	1	1	7
O95158	Q02083	1	0	1	0	0	0	0	0	1	1	1	1	1	7
O95072	Q8NDV3	1	1	0	1	1	0	0	0	1	1	0	0	1	7
O95067	Q99640	0	1	0	0	1	0	1	1	1	1	0	1	0	7
O94986	Q15058	0	1	0	0	1	1	1	1	0	0	1	0	1	7
O94972	Q7L590	1	1	0	0	1	1	1	0	0	1	0	1	0	7
O76081	Q9Y3E2	1	0	0	1	1	1	1	0	1	1	0	0	0	7
O76081	Q9Y230	1	0	0	1	1	1	1	0	1	1	0	0	0	7
O76081	Q9UI30	1	0	0	1	1	1	1	0	1	1	0	0	0	7
O76081	Q9NQS3	1	0	0	1	1	1	1	0	1	1	0	0	0	7
O76081	Q96GS6	1	0	0	1	1	1	1	0	1	1	0	0	0	7
O76081	Q96CS3	1	0	0	1	1	1	1	0	1	1	0	0	0	7
O76081	Q92504	1	0	0	1	1	1	1	0	1	1	0	0	0	7
O76081	Q8TBP0	1	0	0	1	1	1	1	0	1	1	0	0	0	7
O76081	Q86WC4	1	0	0	1	1	1	1	0	1	1	0	0	0	7
O76081	Q15773	1	0	0	1	1	1	1	0	1	1	0	0	0	7
O76081	Q15126	1	0	0	1	1	1	1	0	1	1	0	0	0	7
O76081	Q02930	1	0	0	1	1	1	1	0	1	1	0	0	0	7
O76081	Q01105	1	0	0	1	1	1	1	0	1	1	0	0	0	7
O76081	P49639	1	0	0	1	1	1	1	0	1	1	0	0	0	7
O76081	P46459	1	0	0	1	1	1	1	0	1	1	0	0	0	7
O76081	P43115	1	0	0	1	1	1	1	0	1	1	0	0	0	7
O76081	P40222	1	0	0	1	1	1	1	0	1	1	0	0	0	7
O76081	P29972	1	0	0	1	1	1	1	0	1	1	0	0	0	7
O76081	P19086	1	0	0	1	1	1	1	0	1	1	0	0	0	7
O76081	P10809	1	0	0	1	1	1	1	0	1	1	0	0	0	7
O76081	P09471	1	0	0	1	1	1	1	0	1	1	0	0	0	7
O76081	P07550	1	0	0	1	1	1	1	0	1	1	0	0	0	7
O76081	P04899	1	0	0	1	1	1	1	0	1	1	0	0	0	7
O76003	O76081	1	0	0	1	1	1	1	0	1	1	0	0	0	7
O75947	P49450	0	0	0	0	1	1	1	1	0	0	1	1	1	7
O75925	P10242	1	1	0	0	1	1	1	0	0	0	1	1	0	7
O75752	P09228	1	1	1	0	0	0	1	0	0	0	1	1	1	7
O75752	P01037	1	1	1	0	0	0	1	0	1	0	0	1	1	7
O75665	Q9HBM1	0	1	0	0	0	1	1	1	0	0	1	1	1	7
O75665	Q7L590	1	1	0	0	1	1	1	0	0	1	0	1	0	7
O75444	P10242	1	1	0	0	1	1	1	0	0	0	1	1	0	7
O75419	P68431	1	1	0	0	0	1	1	1	1	0	0	1	0	7
O75419	P51587	1	1	0	0	0	1	1	0	1	1	0	1	0	7
O75376	Q5FBB7	1	0	0	0	0	1	1	0	1	1	1	1	0	7
O75376	P10242	1	1	0	0	1	1	1	0	0	0	1	1	0	7
O75367	P49450	0	0	0	0	1	1	1	1	0	0	1	1	1	7
O60664	Q99640	0	1	0	0	1	0	1	1	1	1	0	1	0	7
O60566	Q5FBB7	1	0	0	0	0	1	1	0	1	1	1	1	0	7
O60496	Q9NSP4	1	1	0	0	0	1	0	1	0	0	1	1	1	7
O60336	O76081	1	0	0	1	1	1	1	0	1	1	0	0	0	7
O60264	P49450	0	0	0	0	1	1	1	1	0	0	1	1	1	7
O60216	Q8NDV3	1	1	0	1	1	0	0	0	1	1	0	0	1	7
O43929	Q7L590	1	1	0	0	1	1	1	0	0	1	0	1	0	7
O43765	P01037	1	1	1	0	0	0	1	0	1	0	0	1	1	7
O43683	Q9HBM1	0	1	0	0	0	1	1	1	0	0	1	1	1	7
O43638	P31276	1	0	0	1	1	0	1	0	1	1	0	1	0	7
O43298	Q7L590	1	1	0	0	1	1	1	0	0	1	0	1	0	7
O43291	Q99640	0	1	0	0	1	0	1	1	1	1	0	1	0	7
O43251	Q12926	1	1	0	0	0	0	1	0	1	1	1	0	1	7
O43248	Q9UL17	1	0	1	1	0	1	0	0	1	1	0	1	0	7
O15269	O76081	1	0	0	1	1	1	1	0	1	1	0	0	0	7
O15078	Q15058	0	1	0	0	1	1	1	1	0	0	1	0	1	7
O14777	Q9HBM1	0	1	0	0	0	1	1	1	0	0	1	1	1	7
O14744	Q8TE85	1	1	1	0	0	0	0	0	1	1	0	1	1	7
O00571	P49450	0	0	0	0	1	1	1	1	0	0	1	1	1	7
O00311	Q7L590	1	1	0	0	1	1	1	0	0	1	0	1	0	7
O00267	Q7L590	1	1	0	0	1	1	1	0	0	1	0	1	0	7
O00255	P10242	1	1	0	0	1	1	1	0	0	0	1	1	0	7
Q9Y2H9	Q9Y6Q5	1	1	0	0	0	0	1	0	1	1	0	0	1	6
Q9Y2H9	Q9Y3B2	1	1	0	0	0	0	1	0	1	1	0	0	1	6
Q9NXK8	Q9Y2H9	1	1	0	0	0	0	1	0	1	1	0	0	1	6
Q9NRD1	Q9UP52	1	1	1	0	0	1	1	0	1	0	0	0	0	6
Q9H0A6	Q9Y2H9	1	1	0	0	0	0	1	0	1	1	0	0	1	6
Q9BWT6	Q9P2W1	0	0	0	0	1	0	1	0	1	1	1	0	1	6
Q9BU64	Q9NSP4	1	1	0	0	0	1	0	1	0	0	0	1	1	6
Q9BQ95	Q9Y2H9	1	1	0	0	0	0	1	0	1	1	0	0	1	6
Q99941	Q9BXT5	0	0	0	1	1	1	1	0	1	1	0	0	0	6
Q96QH2	Q9Y2H9	1	1	0	0	0	0	1	0	1	1	0	0	1	6
Q96JB6	Q9Y2H9	1	1	0	0	0	0	1	0	1	1	0	0	1	6
Q96FJ0	Q9Y2H9	1	1	0	0	0	0	1	0	1	1	0	0	1	6
Q96BT3	Q9NSP4	1	0	0	0	0	1	0	1	0	0	1	1	1	6
Q96AV8	Q9Y265	0	1	0	0	1	1	1	1	0	0	0	1	0	6
Q96AV8	Q9HCE7	0	1	0	0	1	1	1	1	0	0	0	1	0	6
Q92947	Q9Y2H9	1	1	0	0	0	0	1	0	1	1	0	0	1	6
Q92826	Q9Y261	0	0	1	0	0	1	1	1	1	1	0	0	0	6
Q92826	Q99958	0	1	0	0	1	1	1	1	0	1	0	0	0	6
Q8TAG9	Q9Y2H9	1	1	0	0	0	0	1	0	1	1	0	0	1	6
Q8NG50	Q9Y230	1	0	1	0	1	1	1	0	0	0	0	0	1	6
Q8NG50	Q9UBF8	1	0	1	0	1	1	1	0	0	0	0	0	1	6
Q8NG50	Q96HT8	1	0	1	0	1	1	1	0	0	0	0	0	1	6
Q8NCD3	Q9Y265	0	0	0	0	1	1	1	1	0	0	0	1	1	6
Q8NCD3	Q9UKB1	0	0	0	0	1	1	1	1	0	0	0	1	1	6
Q8NCD3	Q9UBU9	0	0	0	0	1	1	1	1	0	0	0	1	1	6
Q8NCD3	Q9NYP9	0	0	0	0	1	1	1	1	0	0	0	1	1	6
Q8NCD3	Q9HCE1	0	0	0	0	1	1	1	1	0	0	0	1	1	6
Q8NCD3	Q96RG2	0	0	0	0	1	1	1	1	0	0	0	1	1	6
Q8NCD3	Q96DB2	0	0	0	0	1	1	1	1	0	0	0	1	1	6
Q8N726	Q9Y463	0	1	0	0	0	1	1	1	0	0	1	1	0	6
Q8N726	Q9Y2A7	0	1	0	0	0	1	1	1	0	0	1	1	0	6
Q8N726	Q9Y230	0	1	0	0	0	1	1	1	0	0	1	1	0	6
Q8N726	Q9UQ80	0	1	0	0	0	1	1	1	0	0	1	1	0	6
Q8N726	Q9UNL4	0	1	0	0	0	1	1	1	0	0	1	1	0	6
Q8N726	Q9UK53	0	1	0	0	0	1	1	1	0	0	1	1	0	6
Q8N726	Q9UJY5	0	1	0	0	0	1	1	1	0	0	1	1	0	6
Q8N726	Q9UHV2	0	1	0	0	0	1	1	1	0	0	1	1	0	6
Q8N726	Q9UHA4	0	1	0	0	0	1	1	1	0	0	1	1	0	6
Q8N726	Q9UER7	0	1	0	0	0	1	1	1	0	0	1	1	0	6
Q8N726	Q9UBU9	0	1	0	0	0	1	1	1	0	0	1	1	0	6
Q8N726	Q9P2B7	0	1	0	0	0	1	1	1	0	0	1	1	0	6
Q8N726	Q9NZ52	0	1	0	0	0	1	1	1	0	0	1	1	0	6
Q8N726	Q9HCE1	0	1	0	0	0	1	1	1	0	0	1	1	0	6
Q8N726	Q9H081	0	1	0	0	0	1	1	1	0	0	1	1	0	6
Q8N726	Q9BZ95	0	1	0	0	0	1	1	1	0	0	1	1	0	6
Q8N726	Q9BY76	0	1	0	0	0	1	1	1	0	0	1	1	0	6
Q8N726	Q9BVP2	0	1	0	0	0	1	1	1	0	0	1	1	0	6
Q8N726	Q9BQE3	0	1	0	0	0	1	1	1	0	0	1	1	0	6
Q8N726	Q99741	0	1	0	0	0	1	1	1	0	0	1	1	0	6
Q8N726	Q99707	0	1	0	0	0	1	1	1	0	0	1	1	0	6
Q8N726	Q99496	0	1	0	0	0	1	1	1	0	0	1	1	0	6
Q8N726	Q99459	0	1	0	0	0	1	1	1	0	0	1	1	0	6
Q8N726	Q96SB3	0	1	0	0	0	1	1	1	0	0	1	1	0	6
Q8N726	Q96JB5	0	1	0	0	0	1	1	1	0	0	1	1	0	6
Q8N726	Q92993	0	1	0	0	0	1	1	1	0	0	1	1	0	6
Q8N726	Q92905	0	1	0	0	0	1	1	1	0	0	1	1	0	6
Q8N726	Q8WYQ5	0	1	0	0	0	1	1	1	0	0	1	1	0	6
Q8N726	Q8WYP3	0	1	0	0	0	1	1	1	0	0	1	1	0	6
Q8N726	Q8WUW1	0	1	0	0	0	1	1	1	0	0	1	1	0	6
Q8N726	Q8TAQ5	0	1	0	0	0	1	1	1	0	0	1	1	0	6
Q8N726	Q8NHU6	0	1	0	0	0	1	1	1	0	0	1	1	0	6
Q8N668	Q8N726	0	1	0	0	0	1	1	1	0	0	1	1	0	6
Q8N2Z9	Q8NB91	1	0	0	1	0	0	1	0	1	1	0	1	0	6
Q8IZD4	Q96AV8	0	1	0	0	1	1	1	1	0	0	0	1	0	6
Q8IWQ3	Q9UM11	1	1	1	1	0	0	0	0	1	0	1	0	0	6
Q8IWQ3	Q92905	1	1	1	1	0	0	0	0	1	0	1	0	0	6
Q8IWQ3	Q8WVZ9	1	1	1	1	0	0	0	0	1	0	1	0	0	6
Q86YJ5	Q9BZM6	1	1	1	0	0	0	1	0	0	0	1	1	0	6
Q7Z6Z7	Q8N726	0	1	0	0	0	1	1	1	0	0	1	1	0	6
Q7L590	Q8N726	1	1	0	0	0	1	1	0	0	1	0	1	0	6
Q71U36	Q8N726	0	1	0	0	0	1	1	1	0	0	1	1	0	6
Q6UXH1	Q8N726	0	1	0	0	0	1	1	1	0	0	1	1	0	6
Q6RW13	Q99259	1	1	1	0	0	0	0	0	1	1	0	1	0	6
Q6P1R4	Q8NCD3	0	0	0	0	1	1	1	1	0	0	0	1	1	6
Q6K0P9	Q9ULW8	0	1	1	0	0	1	0	1	1	1	0	0	0	6
Q6IPU0	Q92674	0	0	1	0	0	1	1	0	1	1	0	0	1	6
Q66K89	Q8N726	0	1	0	0	0	1	1	1	0	0	1	1	0	6
Q5VYX0	Q9Y2H9	1	1	0	0	0	0	1	0	1	1	0	0	1	6
Q5TC82	Q96AV8	0	1	0	0	1	1	1	1	0	0	0	1	0	6
Q16891	Q8NCD3	0	0	0	0	1	1	1	1	0	0	0	1	1	6
Q16665	Q8N726	0	1	0	0	0	1	1	1	0	0	1	1	0	6
Q16576	Q8NCD3	0	0	0	0	1	1	1	1	0	0	0	1	1	6
Q15777	Q5TYM5	0	1	0	0	1	0	1	0	1	1	0	1	0	6
Q15726	Q969F8	1	0	0	0	1	1	1	0	1	0	0	0	1	6
Q15714	Q9UQ10	1	1	0	1	0	0	0	0	0	0	1	1	1	6
Q15628	Q8N726	0	1	0	0	0	1	1	1	0	0	1	1	0	6
Q15398	Q9Y3I1	0	1	0	0	0	1	1	1	0	0	1	0	1	6
Q15398	Q96IZ7	0	1	0	0	0	1	1	1	0	0	1	0	1	6
Q15361	Q8N726	0	1	0	0	0	1	1	1	0	0	1	1	0	6
Q15257	Q969F8	1	0	0	0	1	1	1	0	1	0	0	0	1	6
Q15058	Q9Y2K1	0	1	0	0	1	1	1	0	0	0	1	0	1	6
Q15058	Q9Y2I6	0	1	0	0	1	1	1	0	0	0	1	0	1	6
Q15058	Q9UDY2	0	1	0	0	1	1	1	0	0	0	1	0	1	6
Q15058	Q9NSK0	0	1	0	0	1	1	1	0	0	0	1	0	1	6
Q15058	Q9NRC8	0	1	0	0	1	1	1	1	0	0	1	0	0	6
Q15058	Q9NPJ6	0	1	0	0	1	1	1	0	0	0	1	0	1	6
Q15058	Q9BQE3	0	1	0	0	1	1	1	0	0	0	1	0	1	6
Q15058	Q99598	0	1	0	0	1	1	1	0	0	0	1	0	1	6
Q15058	Q96ST8	0	1	0	0	1	1	1	0	0	0	1	0	1	6
Q15058	Q96MT8	0	1	0	0	1	1	1	0	0	0	1	0	1	6
Q15058	Q96EK5	0	1	0	0	1	1	1	0	0	0	1	0	1	6
Q15058	Q8N960	0	1	0	0	1	1	1	0	0	0	1	0	1	6
Q15058	Q8N4C6	0	1	0	0	1	1	1	0	0	0	1	0	1	6
Q15058	Q8N490	0	1	0	0	1	1	1	0	0	0	1	0	1	6
Q15058	Q8N137	0	1	0	0	1	1	1	0	0	0	1	0	1	6
Q15058	Q8N0Z3	0	1	0	0	1	1	1	0	0	0	1	0	1	6
Q15058	Q86VQ0	0	1	0	0	1	1	1	0	0	0	1	0	1	6
Q15058	Q7Z7A1	0	1	0	0	1	1	1	0	0	0	1	0	1	6
Q15058	Q6ZU80	0	1	0	0	1	1	1	0	0	0	1	0	1	6
Q15058	Q68CZ1	0	1	0	0	1	1	1	0	0	0	1	0	1	6
Q15058	Q5TB80	0	1	0	0	1	1	1	0	0	0	1	0	1	6
Q15058	Q5BJF6	0	1	0	0	1	1	1	0	0	0	1	0	1	6
Q15058	Q49A88	0	1	0	0	1	1	1	0	0	0	1	0	1	6
Q15058	Q32P51	0	1	0	0	1	1	1	0	0	0	1	0	1	6
Q15058	Q15154	0	1	0	0	1	1	1	0	0	0	1	0	1	6
Q15003	Q9ULT8	1	1	0	1	0	1	0	0	1	0	0	1	0	6
Q15003	Q9HBR0	1	1	0	1	0	1	0	0	1	0	0	1	0	6
Q15003	Q9H6Y5	1	1	0	1	0	1	0	0	1	0	0	1	0	6
Q15003	Q9H0B6	1	1	0	1	0	1	0	0	1	0	0	1	0	6
Q15003	Q9BPX3	1	1	0	1	0	1	0	0	1	0	0	1	0	6
Q15003	Q99496	1	1	0	1	0	1	0	0	1	0	0	1	0	6
Q15003	Q99459	1	1	0	1	0	1	0	0	1	0	0	1	0	6
Q15003	Q96LK0	1	1	0	1	0	1	0	0	1	0	0	1	0	6
Q15003	Q92747	1	1	0	1	0	1	0	0	1	0	0	1	0	6
Q15003	Q92538	1	1	0	1	0	1	0	0	1	0	0	1	0	6
Q15003	Q8NDT2	1	1	0	1	0	1	0	0	1	0	0	1	0	6
Q15003	Q8NBT0	1	1	0	1	0	1	0	0	1	0	0	1	0	6
Q15003	Q7Z4Q2	1	1	0	1	0	1	0	0	1	0	0	1	0	6
Q15003	Q6VMQ6	1	1	0	1	0	1	0	0	1	0	0	1	0	6
Q15003	Q6P2H3	1	1	0	1	0	1	0	0	1	0	0	1	0	6
Q15003	Q5TC82	1	1	0	1	0	1	0	0	1	0	0	1	0	6
Q15003	Q5T447	1	1	0	1	0	1	0	0	1	0	0	1	0	6
Q15003	Q15149	1	1	0	1	0	1	0	0	1	0	0	1	0	6
Q15003	Q15021	1	1	0	1	0	1	0	0	1	0	0	1	0	6
Q14974	Q15398	0	1	0	0	0	1	1	1	0	0	1	0	1	6
Q14680	Q9NWV8	0	1	0	0	1	1	1	1	0	0	1	0	0	6
Q14680	Q9BVC4	0	1	0	0	1	1	1	1	0	0	1	0	0	6
Q14680	Q9BRT8	0	1	0	0	1	1	1	1	0	0	1	0	0	6
Q14680	Q99459	0	1	0	0	1	1	1	1	0	0	1	0	0	6
Q14680	Q969S3	0	1	0	0	1	1	1	1	0	0	1	0	0	6
Q14669	Q8N726	0	1	0	0	0	1	1	1	0	0	1	1	0	6
Q14566	Q8N726	0	1	0	0	0	1	1	1	0	0	1	1	0	6
Q14457	Q8N726	0	1	0	0	0	1	1	1	0	0	1	1	0	6
Q14203	Q15398	0	1	0	0	0	1	1	1	0	0	1	0	1	6
Q14203	Q15058	0	1	0	0	1	1	1	0	0	0	1	0	1	6
Q13867	Q9Y2H9	1	1	0	0	0	0	1	0	1	1	0	0	1	6
Q13617	Q8N726	0	1	0	0	0	1	1	1	0	0	1	1	0	6
Q13573	Q9BZD4	0	1	0	0	0	0	1	0	1	0	1	1	1	6
Q13547	Q8N726	0	1	0	0	0	1	1	1	0	0	1	1	0	6
Q13535	Q8N726	0	1	0	0	0	1	1	1	0	0	1	1	0	6
Q13425	Q9Y2H9	1	1	0	0	0	0	1	0	1	1	0	0	1	6
Q13363	Q96AV8	0	1	0	0	1	1	1	1	0	0	0	1	0	6
Q13325	Q9Y2H9	1	1	0	0	0	0	1	0	1	1	0	0	1	6
Q13287	Q8N726	0	1	0	0	0	1	1	1	0	0	1	1	0	6
Q13263	Q8N726	0	1	0	0	0	1	1	1	0	0	1	1	0	6
Q13201	Q8N726	0	1	0	0	0	1	1	1	0	0	1	1	0	6
Q13188	Q99259	1	1	1	0	0	0	0	0	1	1	0	1	0	6
Q13131	Q8IWQ3	1	1	1	1	0	0	0	0	1	0	1	0	0	6
Q13105	Q8N726	0	1	0	0	0	1	1	1	0	0	1	1	0	6
Q12952	Q15003	1	1	0	1	0	1	0	0	1	0	0	1	0	6
Q12933	Q15398	0	1	0	0	0	1	1	1	0	0	1	0	1	6
Q12926	Q96HE9	1	1	0	0	0	0	1	0	1	1	0	0	1	6
Q09028	Q8NCD3	0	0	0	0	1	1	1	1	0	0	0	1	1	6
Q08379	Q15398	0	1	0	0	0	1	1	1	0	0	1	0	1	6
Q07817	Q8N726	0	1	0	0	0	1	1	1	0	0	1	1	0	6
Q07021	Q8N726	0	1	0	0	0	1	1	1	0	0	1	1	0	6
Q07011	Q9BUZ4	1	1	0	1	0	1	1	0	0	0	0	1	0	6
Q07011	Q96L50	1	1	0	1	0	1	1	0	0	0	0	1	0	6
Q07011	Q8TCT0	1	1	0	1	0	1	1	0	0	0	0	1	0	6
Q07011	Q13433	1	1	0	1	0	1	1	0	0	0	0	1	0	6
Q07011	Q13114	1	1	0	1	0	1	1	0	0	0	0	1	0	6
Q07011	Q13077	1	1	0	1	0	1	1	0	0	0	0	1	0	6
Q07011	Q12933	1	1	0	1	0	1	1	0	0	0	0	1	0	6
Q04917	Q9Y2H9	1	1	0	0	0	0	1	0	1	1	0	0	1	6
Q04206	Q8N726	0	1	0	0	0	1	1	1	0	0	1	1	0	6
Q03405	Q14680	0	1	0	0	1	1	1	1	0	0	1	0	0	6
Q02156	Q99259	1	1	1	0	0	0	0	0	1	1	0	1	0	6
Q01094	Q8N726	0	1	0	0	0	1	1	1	0	0	1	1	0	6
Q00987	Q8N726	0	1	0	0	0	1	1	1	0	0	1	1	0	6
Q00839	Q8N726	0	1	0	0	0	1	1	1	0	0	1	1	0	6
Q00535	Q9Y2H9	1	1	0	0	0	0	1	0	1	1	0	0	1	6
Q00534	Q8N726	0	1	0	0	0	1	1	1	0	0	1	1	0	6
P78346	Q9Y2H9	1	1	0	0	0	0	1	0	1	1	0	0	1	6
P78345	Q8N726	0	1	0	0	0	1	1	1	0	0	1	1	0	6
P68431	Q9NRC8	1	1	0	0	0	0	0	1	1	0	1	1	0	6
P68371	Q8N726	0	1	0	0	0	1	1	1	0	0	1	1	0	6
P67775	Q969F8	1	0	0	0	1	1	1	0	1	0	0	0	1	6
P63279	Q8N726	0	1	0	0	0	1	1	1	0	0	1	1	0	6
P63261	Q8N726	0	1	0	0	0	1	1	1	0	0	1	1	0	6
P63172	Q15003	1	1	0	1	0	1	0	0	1	0	0	1	0	6
P63104	Q9Y2H9	1	1	0	0	0	0	1	0	1	1	0	0	1	6
P62807	Q15398	0	1	0	0	0	1	1	1	0	0	1	0	1	6
P62805	Q86Y97	0	0	0	0	0	1	1	0	1	1	1	0	1	6
P62258	Q9Y2H9	1	1	0	0	0	0	1	0	1	1	0	0	1	6
P62140	Q8N726	0	1	0	0	0	1	1	1	0	0	1	1	0	6
P61289	Q8N726	0	1	0	0	0	1	1	1	0	0	1	1	0	6
P60709	Q8N726	0	1	0	0	0	1	1	1	0	0	1	1	0	6
P60033	Q9UP52	1	1	1	0	0	1	1	0	1	0	0	0	0	6
P57775	Q9Y2H9	1	1	0	0	0	0	1	0	1	1	0	0	1	6
P56545	Q8N726	0	1	0	0	0	1	1	1	0	0	1	1	0	6
P56385	Q15058	0	1	0	0	1	1	1	0	0	0	1	0	1	6
P56282	Q9UKR5	0	1	0	0	0	0	1	1	1	1	0	0	1	6
P56282	Q9UBU9	0	1	0	0	0	0	1	1	1	1	0	0	1	6
P56282	Q9NRF9	0	1	0	0	0	0	1	1	1	1	0	0	1	6
P56282	Q9NR33	0	1	0	0	0	0	1	1	1	1	0	0	1	6
P56282	Q9BSM1	0	1	0	0	0	0	1	1	1	1	0	0	1	6
P56282	Q92993	0	1	0	0	0	0	1	1	1	1	0	0	1	6
P56282	Q15691	0	1	0	0	0	0	1	1	1	1	0	0	1	6
P56282	Q07864	0	1	0	0	0	0	1	1	1	1	0	0	1	6
P56282	Q04864	0	1	0	0	0	0	1	1	1	1	0	0	1	6
P56282	Q04724	0	1	0	0	0	0	1	1	1	1	0	0	1	6
P56282	Q01664	0	1	0	0	0	0	1	1	1	1	0	0	1	6
P56282	P68104	0	1	0	0	0	0	1	1	1	1	0	0	1	6
P55072	Q8IWQ3	1	1	1	1	0	0	0	0	1	0	1	0	0	6
P55072	Q15003	1	1	0	1	0	1	0	0	1	0	0	1	0	6
P54725	Q9Y2H9	1	1	0	0	0	0	1	0	1	1	0	0	1	6
P53779	Q99640	0	0	0	0	1	0	1	1	1	1	0	1	0	6
P53396	Q8N726	0	1	0	0	0	1	1	1	0	0	1	1	0	6
P52799	Q15058	0	1	0	0	1	1	1	0	0	0	1	0	1	6
P52594	P56282	0	1	0	0	0	0	1	1	1	1	0	0	1	6
P51959	Q8N726	0	1	0	0	0	1	1	1	0	0	1	1	0	6
P51955	Q9Y2X7	1	1	0	0	0	0	1	0	1	1	0	1	0	6
P51955	Q9UM11	1	1	0	0	0	0	1	0	1	1	0	1	0	6
P51955	Q9UJX5	1	1	0	0	0	0	1	0	1	1	0	1	0	6
P51955	Q9UJX2	1	1	0	0	0	0	1	0	1	1	0	1	0	6
P51955	Q9P2B7	1	1	0	0	0	0	1	0	1	1	0	1	0	6
P51955	Q9HCE7	1	1	0	0	0	0	1	0	1	1	0	1	0	6
P51955	Q9BV73	1	1	0	0	0	0	1	0	1	1	0	1	0	6
P51955	Q9BQ70	1	1	0	0	0	0	1	0	1	1	0	1	0	6
P51955	Q96RY7	1	1	0	0	0	0	1	0	1	1	0	1	0	6
P51955	Q96PX6	1	1	0	0	0	0	1	0	1	1	0	1	0	6
P51955	Q5VU43	1	1	0	0	0	0	1	0	1	1	0	1	0	6
P51955	Q5BJF6	1	1	0	0	0	0	1	0	1	1	0	1	0	6
P51955	Q3B7T1	1	1	0	0	0	0	1	0	1	1	0	1	0	6
P51955	Q16891	1	1	0	0	0	0	1	0	1	1	0	1	0	6
P51955	Q14240	1	1	0	0	0	0	1	0	1	1	0	1	0	6
P51955	Q14203	1	1	0	0	0	0	1	0	1	1	0	1	0	6
P51955	Q13257	1	1	0	0	0	0	1	0	1	1	0	1	0	6
P51955	Q13042	1	1	0	0	0	0	1	0	1	1	0	1	0	6
P51955	Q12834	1	1	0	0	0	0	1	0	1	1	0	1	0	6
P51955	P62136	1	1	0	0	0	0	1	0	1	1	0	1	0	6
P51955	P60006	1	1	0	0	0	0	1	0	1	1	0	1	0	6
P51955	P55072	1	1	0	0	0	0	1	0	1	1	0	1	0	6
P51532	Q8N726	0	1	0	0	0	1	1	1	0	0	1	1	0	6
P50219	Q92905	1	1	0	0	0	1	1	0	1	0	0	1	0	6
P49810	Q9Y2H9	1	1	0	0	0	0	1	0	1	1	0	0	1	6
P49760	Q8N726	0	1	0	0	0	1	1	1	0	0	1	1	0	6
P49759	Q15058	0	1	0	0	1	1	1	0	0	0	1	0	1	6
P49736	Q8N726	0	1	0	0	0	1	1	1	0	0	1	1	0	6
P49736	Q15058	0	1	0	0	1	1	1	0	0	0	1	0	1	6
P49459	Q8N726	0	1	0	0	0	1	1	1	0	0	1	1	0	6
P49450	Q9NSV4	0	0	0	0	1	1	1	1	0	0	1	1	0	6
P49450	P62805	0	0	0	0	0	1	1	0	1	1	1	0	1	6
P48059	Q5FBB7	0	0	0	0	0	1	1	0	1	1	1	1	0	6
P46952	Q99259	1	1	1	0	0	0	0	0	1	1	0	1	0	6
P46940	Q8N726	0	1	0	0	0	1	1	1	0	0	1	1	0	6
P46379	Q8N726	0	1	0	0	0	1	1	1	0	0	1	1	0	6
P46108	Q99645	1	1	1	1	0	0	0	0	1	0	0	0	1	6
P45983	Q99640	0	1	0	0	1	0	1	1	1	1	0	0	0	6
P43489	Q07011	1	1	0	1	0	1	1	0	0	0	0	1	0	6
P43365	Q7Z3B3	1	0	0	1	0	0	0	1	1	1	0	1	0	6
P43360	Q9Y333	1	1	1	0	0	0	0	0	1	1	0	1	0	6
P43360	Q9P2K3	1	1	1	0	0	0	0	0	1	1	0	1	0	6
P43360	Q9NXC2	1	1	1	0	0	0	0	0	1	1	0	1	0	6
P43360	Q9HAV4	1	1	1	0	0	0	0	0	1	1	0	1	0	6
P43360	Q9H788	1	1	1	0	0	0	0	0	1	1	0	1	0	6
P43360	Q9H2L5	1	1	1	0	0	0	0	0	1	1	0	1	0	6
P43360	Q9BQE9	1	1	1	0	0	0	0	0	1	1	0	1	0	6
P43360	Q96FJ0	1	1	1	0	0	0	0	0	1	1	0	1	0	6
P43360	Q96DI7	1	1	1	0	0	0	0	0	1	1	0	1	0	6
P43360	Q96CS2	1	1	1	0	0	0	0	0	1	1	0	1	0	6
P43360	Q92616	1	1	1	0	0	0	0	0	1	1	0	1	0	6
P43360	Q8TD10	1	1	1	0	0	0	0	0	1	1	0	1	0	6
P43360	Q8N5M1	1	1	1	0	0	0	0	0	1	1	0	1	0	6
P43360	Q8N3X6	1	1	1	0	0	0	0	0	1	1	0	1	0	6
P43360	Q8N163	1	1	1	0	0	0	0	0	1	1	0	1	0	6
P43360	Q8IYE0	1	1	1	0	0	0	0	0	1	1	0	1	0	6
P43360	Q86Y56	1	1	1	0	0	0	0	0	1	1	0	1	0	6
P43360	Q5SQN1	1	1	1	0	0	0	0	0	1	1	0	1	0	6
P43360	Q32MH5	1	1	1	0	0	0	0	0	1	1	0	1	0	6
P43360	Q16619	1	1	1	0	0	0	0	0	1	1	0	1	0	6
P43360	Q13263	1	1	1	0	0	0	0	0	1	1	0	1	0	6
P43360	Q13190	1	1	1	0	0	0	0	0	1	1	0	1	0	6
P43360	Q12899	1	1	1	0	0	0	0	0	1	1	0	1	0	6
P43360	Q08499	1	1	1	0	0	0	0	0	1	1	0	1	0	6
P43360	Q04637	1	1	1	0	0	0	0	0	1	1	0	1	0	6
P43360	Q00341	1	1	1	0	0	0	0	0	1	1	0	1	0	6
P43360	P78344	1	1	1	0	0	0	0	0	1	1	0	1	0	6
P43360	P61513	1	1	1	0	0	0	0	0	1	1	0	1	0	6
P43356	Q8NEY4	1	0	1	1	0	0	0	0	1	1	0	1	0	6
P43356	Q8N720	1	0	1	1	0	0	0	0	1	1	0	1	0	6
P43356	Q8IYX8	1	0	1	1	0	0	0	0	1	1	0	1	0	6
P43356	Q86XR8	1	0	1	1	0	0	0	0	1	1	0	1	0	6
P43356	Q7Z4N8	1	0	1	1	0	0	0	0	1	1	0	1	0	6
P43356	Q13263	1	0	1	1	0	0	0	0	1	1	0	1	0	6
P43356	Q00987	1	0	1	1	0	0	0	0	1	1	0	1	0	6
P43355	Q9Y6B2	1	1	0	1	0	0	0	1	1	1	0	0	0	6
P43355	Q9Y2R9	1	1	0	1	0	0	0	1	1	1	0	0	0	6
P43355	Q9UBW7	1	1	0	1	0	0	0	1	1	1	0	0	0	6
P43355	Q9P2K3	1	1	0	1	0	0	0	1	1	1	0	0	0	6
P43355	Q9NYY8	1	1	0	1	0	0	0	1	1	1	0	0	0	6
P43355	Q9NXX6	1	1	0	1	0	0	0	1	1	1	0	0	0	6
P43355	Q9NW64	1	1	0	1	0	0	0	1	1	1	0	0	0	6
P43355	Q9NUL5	1	1	0	1	0	0	0	1	1	1	0	0	0	6
P43355	Q9NRD5	1	1	0	1	0	0	0	1	1	1	0	0	0	6
P43355	Q9NR46	1	1	0	1	0	0	0	1	1	1	0	0	0	6
P43355	Q9NQG6	1	1	0	1	0	0	0	1	1	1	0	0	0	6
P43355	Q9HAF1	1	1	0	1	0	0	0	1	1	1	0	0	0	6
P43355	Q9H930	1	1	0	1	0	0	0	1	1	1	0	0	0	6
P43355	Q9H7D7	1	1	0	1	0	0	0	1	1	1	0	0	0	6
P43355	Q9H0T7	1	1	0	1	0	0	0	1	1	1	0	0	0	6
P43355	Q9BZR9	1	1	0	1	0	0	0	1	1	1	0	0	0	6
P43355	Q9BYE7	1	1	0	1	0	0	0	1	1	1	0	0	0	6
P43355	Q9BXP5	1	1	0	1	0	0	0	1	1	1	0	0	0	6
P43355	Q99457	1	1	0	1	0	0	0	1	1	1	0	0	0	6
P43355	Q96ME1	1	1	0	1	0	0	0	1	1	1	0	0	0	6
P43355	Q96EW2	1	1	0	1	0	0	0	1	1	1	0	0	0	6
P43355	Q96DA6	1	1	0	1	0	0	0	1	1	1	0	0	0	6
P43355	Q96A37	1	1	0	1	0	0	0	1	1	1	0	0	0	6
P43355	Q96A19	1	1	0	1	0	0	0	1	1	1	0	0	0	6
P43355	Q969P6	1	1	0	1	0	0	0	1	1	1	0	0	0	6
P43355	Q8WV44	1	1	0	1	0	0	0	1	1	1	0	0	0	6
P43355	Q8TBZ8	1	1	0	1	0	0	0	1	1	1	0	0	0	6
P43355	Q8N6I1	1	1	0	1	0	0	0	1	1	1	0	0	0	6
P43355	Q8N140	1	1	0	1	0	0	0	1	1	1	0	0	0	6
P43355	Q8IYX8	1	1	0	1	0	0	0	1	1	1	0	0	0	6
P43355	Q8IWZ3	1	1	0	1	0	0	0	1	1	1	0	0	0	6
P43355	Q7Z7A3	1	1	0	1	0	0	0	1	1	1	0	0	0	6
P43355	Q7Z6Z7	1	1	0	1	0	0	0	1	1	1	0	0	0	6
P43355	Q6UWE0	1	1	0	1	0	0	0	1	1	1	0	0	0	6
P43355	Q58WW2	1	1	0	1	0	0	0	1	1	1	0	0	0	6
P43355	Q49A88	1	1	0	1	0	0	0	1	1	1	0	0	0	6
P43355	Q49A26	1	1	0	1	0	0	0	1	1	1	0	0	0	6
P43355	Q3V6T2	1	1	0	1	0	0	0	1	1	1	0	0	0	6
P43355	Q15047	1	1	0	1	0	0	0	1	1	1	0	0	0	6
P43355	Q14242	1	1	0	1	0	0	0	1	1	1	0	0	0	6
P43355	Q13576	1	1	0	1	0	0	0	1	1	1	0	0	0	6
P43355	Q13573	1	1	0	1	0	0	0	1	1	1	0	0	0	6
P43355	Q13547	1	1	0	1	0	0	0	1	1	1	0	0	0	6
P43355	Q13098	1	1	0	1	0	0	0	1	1	1	0	0	0	6
P43355	Q13033	1	1	0	1	0	0	0	1	1	1	0	0	0	6
P43355	Q07617	1	1	0	1	0	0	0	1	1	1	0	0	0	6
P43355	Q05086	1	1	0	1	0	0	0	1	1	1	0	0	0	6
P43355	Q03001	1	1	0	1	0	0	0	1	1	1	0	0	0	6
P43355	Q02338	1	1	0	1	0	0	0	1	1	1	0	0	0	6
P43355	P78347	1	1	0	1	0	0	0	1	1	1	0	0	0	6
P43355	P78344	1	1	0	1	0	0	0	1	1	1	0	0	0	6
P43355	P68104	1	1	0	1	0	0	0	1	1	1	0	0	0	6
P43355	P51398	1	1	0	1	0	0	0	1	1	1	0	0	0	6
P42704	P43360	1	1	1	0	0	0	0	0	1	1	0	1	0	6
P41273	Q07011	1	1	0	1	0	1	1	0	0	0	0	1	0	6
P41236	P51955	1	1	0	0	0	0	1	0	1	1	0	1	0	6
P40855	P56282	0	1	0	0	0	0	1	1	1	1	0	0	1	6
P40426	P43355	1	1	0	1	0	0	0	1	1	1	0	0	0	6
P40425	P43355	1	1	0	1	0	0	0	1	1	1	0	0	0	6
P40424	P43355	1	1	0	1	0	0	0	1	1	1	0	0	0	6
P40337	Q8N726	0	1	0	0	0	1	1	1	0	0	1	1	0	6
P39656	P43360	1	1	1	0	0	0	0	0	1	1	0	1	0	6
P38646	Q8N726	0	1	0	0	0	1	1	1	0	0	1	1	0	6
P38398	Q8N726	0	1	0	0	0	1	1	1	0	0	1	1	0	6
P36873	Q8N726	0	1	0	0	0	1	1	1	0	0	1	1	0	6
P36873	P51955	1	1	0	0	0	0	1	0	1	1	0	1	0	6
P36776	Q9Y2H9	1	1	0	0	0	0	1	0	1	1	0	0	1	6
P35453	Q9Y2G2	0	0	0	1	1	1	0	0	1	1	0	1	0	6
P35453	Q9P0K8	0	0	0	1	1	1	0	0	1	1	0	1	0	6
P35453	Q9H334	0	0	0	1	1	1	0	0	1	1	0	1	0	6
P35453	Q9C009	0	0	0	1	1	1	0	0	1	1	0	1	0	6
P35453	Q9BZS1	0	0	0	1	1	1	0	0	1	1	0	1	0	6
P35453	Q92793	0	0	0	1	1	1	0	0	1	1	0	1	0	6
P35453	Q15562	0	0	0	1	1	1	0	0	1	1	0	1	0	6
P35453	Q12948	0	0	0	1	1	1	0	0	1	1	0	1	0	6
P35453	Q12946	0	0	0	1	1	1	0	0	1	1	0	1	0	6
P35453	Q12778	0	0	0	1	1	1	0	0	1	1	0	1	0	6
P35453	Q06330	0	0	0	1	1	1	0	0	1	1	0	1	0	6
P35453	Q03405	0	0	0	1	1	1	0	0	1	1	0	1	0	6
P35453	Q01167	0	0	0	1	1	1	0	0	1	1	0	1	0	6
P35222	P51955	1	1	0	0	0	0	1	0	1	1	0	1	0	6
P34932	Q8N726	0	1	0	0	0	1	1	1	0	0	1	1	0	6
P34897	Q8NCD3	0	0	0	0	1	1	1	1	0	0	0	1	1	6
P34810	Q15058	0	1	0	0	1	1	1	0	0	0	1	0	1	6
P33992	Q8N726	0	1	0	0	0	1	1	1	0	0	1	1	0	6
P33981	Q8NG31	1	1	0	0	0	0	1	1	0	0	1	1	0	6
P33981	Q14674	0	1	0	0	0	0	1	1	1	0	1	1	0	6
P32242	Q14533	1	0	1	0	1	0	1	0	1	1	0	0	0	6
P32242	P49747	1	0	1	0	1	0	1	0	1	0	1	0	0	6
P32119	Q9Y2H9	1	1	0	0	0	0	1	0	1	1	0	0	1	6
P31947	P43355	1	1	0	1	0	0	0	1	1	1	0	0	0	6
P31946	Q9Y2H9	1	1	0	0	0	0	1	0	1	1	0	0	1	6
P31274	Q96HN2	1	0	0	1	0	0	0	1	1	0	0	1	1	6
P31274	Q8TF68	1	0	0	1	0	0	0	1	1	0	0	1	1	6
P31274	Q16539	1	0	0	1	0	0	0	1	1	0	0	1	1	6
P31274	Q13287	1	0	0	1	0	0	0	1	1	0	0	1	1	6
P31274	Q00978	1	0	0	1	0	0	0	1	1	0	0	1	1	6
P31274	P35227	1	0	0	1	0	0	0	1	1	0	0	1	1	6
P30305	Q8IWQ3	1	1	1	1	0	0	0	0	1	0	1	0	0	6
P30305	Q14680	0	1	0	0	1	1	1	1	0	0	1	0	0	6
P30291	Q8IWQ3	1	1	1	1	0	0	0	0	1	0	1	0	0	6
P30279	Q8N726	0	1	0	0	0	1	1	1	0	0	1	1	0	6
P30260	P51955	1	1	0	0	0	0	1	0	1	1	0	1	0	6
P30044	P43355	1	1	0	1	0	0	0	1	1	1	0	0	0	6
P29590	Q8N726	0	1	0	0	0	1	1	1	0	0	1	1	0	6
P29590	P43356	1	0	1	1	0	0	0	0	1	1	0	1	0	6
P29474	Q9Y2H9	1	1	0	0	0	0	1	0	1	1	0	0	1	6
P28482	P51955	1	1	0	0	0	0	1	0	1	1	0	1	0	6
P27544	Q6NUS6	0	0	0	0	1	1	1	0	1	1	1	0	0	6
P27544	Q16659	0	0	0	0	1	1	1	0	1	1	1	0	0	6
P26885	Q8N726	0	1	0	0	0	1	1	1	0	0	1	1	0	6
P25685	Q9Y2H9	1	1	0	0	0	0	1	0	1	1	0	0	1	6
P25490	Q8N726	0	1	0	0	0	1	1	1	0	0	1	1	0	6
P24385	Q8N726	0	1	0	0	0	1	1	1	0	0	1	1	0	6
P22626	Q8N726	0	1	0	0	0	1	1	1	0	0	1	1	0	6
P22466	Q15717	1	1	0	0	0	0	1	0	1	1	1	0	0	6
P21453	P28221	0	1	1	1	0	0	1	0	0	0	0	1	1	6
P20700	Q14680	0	1	0	0	1	1	1	1	0	0	1	0	0	6
P20337	Q9ULV0	1	1	0	1	0	0	0	0	1	1	0	1	0	6
P20337	Q9UHK0	1	1	0	1	0	0	0	0	1	1	0	1	0	6
P20337	Q96C24	1	1	0	1	0	0	0	0	1	1	0	1	0	6
P20337	Q13291	1	1	0	1	0	0	0	0	1	1	0	1	0	6
P20337	Q13277	1	1	0	1	0	0	0	0	1	1	0	1	0	6
P20337	P62491	1	1	0	1	0	0	0	0	1	1	0	1	0	6
P20337	P61006	1	1	0	1	0	0	0	0	1	1	0	1	0	6
P20337	P31150	1	1	0	1	0	0	0	0	1	1	0	1	0	6
P20336	Q9Y2H9	1	1	0	0	0	0	1	0	1	1	0	0	1	6
P20336	P20337	1	1	0	1	0	0	0	0	1	1	0	1	0	6
P20061	P22681	0	0	1	0	0	1	1	0	1	0	0	1	1	6
P20036	P35453	0	0	0	1	1	1	0	0	1	1	0	1	0	6
P20036	P22466	1	1	0	0	0	0	1	0	1	1	1	0	0	6
P19622	Q01844	1	0	1	1	0	0	1	0	0	1	1	0	0	6
P19338	Q8N726	0	1	0	0	0	1	1	1	0	0	1	1	0	6
P19105	Q8N726	0	1	0	0	0	1	1	1	0	0	1	1	0	6
P19012	Q7L590	0	1	0	0	0	1	1	0	0	1	0	1	1	6
P18146	Q8N726	0	1	0	0	0	1	1	1	0	0	1	1	0	6
P17980	Q8N726	0	1	0	0	0	1	1	1	0	0	1	1	0	6
P17612	Q99259	1	1	1	0	0	0	0	0	1	1	0	1	0	6
P17482	P55317	1	1	0	1	0	0	1	0	1	1	0	0	0	6
P17252	Q8N726	0	1	0	0	0	1	1	1	0	0	1	1	0	6
P16885	Q99645	1	1	1	1	0	0	0	0	1	0	0	0	1	6
P16220	P35453	0	0	0	1	1	1	0	0	1	1	0	1	0	6
P16188	P43355	1	1	0	1	0	0	0	1	1	1	0	0	0	6
P15884	Q0VG99	1	0	0	0	0	0	1	0	1	0	1	1	1	6
P14927	P43355	1	1	0	1	0	0	0	1	1	1	0	0	0	6
P14859	Q92826	0	1	0	0	0	1	1	1	1	1	0	0	0	6
P14859	P31274	1	0	0	1	0	0	0	1	1	0	0	1	1	6
P14735	P31274	1	0	0	1	0	0	0	1	1	0	0	1	1	6
P14678	Q8N726	0	1	0	0	0	1	1	1	0	0	1	1	0	6
P14373	P56282	0	1	0	0	0	0	1	1	1	1	0	0	1	6
P13746	P43355	1	1	0	1	0	0	0	1	1	1	0	0	0	6
P13639	Q8N726	0	1	0	0	0	1	1	1	0	0	1	1	0	6
P13611	P78556	1	1	0	0	0	1	1	0	0	0	0	1	1	6
P12314	P46109	1	1	0	1	0	0	0	0	0	0	1	1	1	6
P12314	P43405	1	1	0	1	0	0	0	0	0	0	1	1	1	6
P12004	Q8N726	0	1	0	0	0	1	1	1	0	0	1	1	0	6
P11802	Q8N726	0	1	0	0	0	1	1	1	0	0	1	1	0	6
P11387	Q8N726	0	1	0	0	0	1	1	1	0	0	1	1	0	6
P11142	Q8N726	0	1	0	0	0	1	1	1	0	0	1	1	0	6
P10600	P78556	1	1	0	0	0	1	1	0	0	0	0	1	1	6
P09238	Q96GW7	1	0	1	0	1	0	0	0	1	1	0	1	0	6
P09016	Q92826	0	0	0	0	1	1	1	1	1	1	0	0	0	6
P09012	Q8N726	0	1	0	0	0	1	1	1	0	0	1	1	0	6
P08779	Q9UBS0	1	0	1	0	0	0	0	0	1	1	0	1	1	6
P08779	Q9H0W5	1	0	1	0	0	0	0	0	1	1	0	1	1	6
P08779	Q96CW1	1	0	1	0	0	0	0	0	1	1	0	1	1	6
P08779	Q92905	1	0	1	0	0	0	0	0	1	1	0	1	1	6
P08779	Q8TF42	1	0	1	0	0	0	0	0	1	1	0	1	1	6
P08779	Q86VP6	1	0	1	0	0	0	0	0	1	1	0	1	1	6
P08779	Q15843	1	0	1	0	0	0	0	0	1	1	0	1	1	6
P08779	Q15051	1	0	1	0	0	0	0	0	1	1	0	1	1	6
P08779	Q13620	1	0	1	0	0	0	0	0	1	1	0	1	1	6
P08779	Q13618	1	0	1	0	0	0	0	0	1	1	0	1	1	6
P08779	Q13617	1	0	1	0	0	0	0	0	1	1	0	1	1	6
P08779	Q13616	1	0	1	0	0	0	0	0	1	1	0	1	1	6
P08779	Q01844	1	0	1	0	0	0	0	0	1	1	0	1	1	6
P08779	P62993	1	0	1	0	0	0	0	0	1	1	0	1	1	6
P08779	P52272	1	0	1	0	0	0	0	0	1	1	0	1	1	6
P08779	P46108	1	0	1	0	0	0	0	0	1	1	0	1	1	6
P08779	P42566	1	0	1	0	0	0	0	0	1	1	0	1	1	6
P08779	P38919	1	0	1	0	0	0	0	0	1	1	0	1	1	6
P08779	P29353	1	0	1	0	0	0	0	0	1	1	0	1	1	6
P08779	P22681	1	0	1	0	0	0	0	0	1	1	0	1	1	6
P08779	P15924	1	0	1	0	0	0	0	0	1	1	0	1	1	6
P08779	P13612	1	0	1	0	0	0	0	0	1	1	0	1	1	6
P08779	P09651	1	0	1	0	0	0	0	0	1	1	0	1	1	6
P08637	P12314	1	1	0	1	0	0	0	0	0	0	1	1	1	6
P08631	P12314	1	1	0	1	0	0	0	0	0	0	1	1	1	6
P08238	Q8N726	0	1	0	0	0	1	1	1	0	0	1	1	0	6
P07910	Q8N726	0	1	0	0	0	1	1	1	0	0	1	1	0	6
P07900	Q8N726	0	1	0	0	0	1	1	1	0	0	1	1	0	6
P07477	Q9Y2H1	1	0	0	0	1	0	0	1	1	1	0	0	1	6
P07477	Q9P253	1	0	0	0	1	0	0	1	1	1	0	0	1	6
P07477	Q9BXB1	1	0	0	0	1	0	0	1	1	1	0	0	1	6
P07477	Q9BV73	1	0	0	0	1	0	0	1	1	1	0	0	1	6
P07477	Q7Z6Z7	1	0	0	0	1	0	0	1	1	1	0	0	1	6
P07477	P50452	1	0	0	0	1	0	0	1	1	1	0	0	1	6
P07477	P37840	1	0	0	0	1	0	0	1	1	1	0	0	1	6
P07477	P17844	1	0	0	0	1	0	0	1	1	1	0	0	1	6
P07477	P13645	1	0	0	0	1	0	0	1	1	1	0	0	1	6
P07477	P08697	1	0	0	0	1	0	0	1	1	1	0	0	1	6
P07437	Q8N726	0	1	0	0	0	1	1	1	0	0	1	1	0	6
P07437	P43356	1	0	1	1	0	0	0	0	1	1	0	1	0	6
P06753	P51955	1	1	0	0	0	0	1	0	1	1	0	1	0	6
P06748	Q9BXT5	0	0	0	1	1	1	1	0	1	1	0	0	0	6
P06748	Q8NCD3	0	0	0	0	1	1	1	1	0	0	0	1	1	6
P06748	Q8N726	0	1	0	0	0	1	1	1	0	0	1	1	0	6
P06493	Q15003	1	1	0	1	0	1	0	0	1	0	0	1	0	6
P05423	P31274	1	0	0	1	0	0	0	1	1	0	0	1	1	6
P05412	P35453	0	0	0	1	1	1	0	0	1	1	0	1	0	6
P05067	Q9Y2H9	1	1	0	0	0	0	1	0	1	1	0	0	1	6
P05067	Q15398	0	1	0	0	0	1	1	1	0	0	1	0	1	6
P04637	P43356	1	0	1	1	0	0	0	0	1	1	0	1	0	6
P04439	P43355	1	1	0	1	0	0	0	1	1	1	0	0	0	6
P04406	Q8N726	0	1	0	0	0	1	1	1	0	0	1	1	0	6
P04198	Q8N726	0	1	0	0	0	1	1	0	1	1	0	1	0	6
P04075	Q15003	1	1	0	1	0	1	0	0	1	0	0	1	0	6
P04070	Q9UNN8	1	0	0	0	0	0	0	0	1	1	1	1	1	6
P04070	P67870	1	0	0	0	0	0	0	0	1	1	1	1	1	6
P04070	P04183	1	0	0	0	0	0	0	0	1	1	1	1	1	6
P03372	Q15003	1	1	0	1	0	1	0	0	1	0	0	1	0	6
P02751	Q8N726	0	1	0	0	0	1	1	1	0	0	1	1	0	6
P02751	P08779	1	0	1	0	0	0	0	0	1	1	0	1	1	6
P02686	Q14680	0	1	0	0	1	1	1	1	0	0	1	0	0	6
P02649	Q9Y2H9	1	1	0	0	0	0	1	0	1	1	0	0	1	6
P01833	P20337	1	1	0	1	0	0	0	0	1	1	0	1	0	6
P01116	P12314	1	1	0	1	0	0	0	0	0	0	1	1	1	6
P01106	Q8N726	0	1	0	0	0	1	1	1	0	0	1	1	0	6
P01106	P51955	1	1	0	0	0	0	1	0	1	1	0	1	0	6
P01100	P35453	0	0	0	1	1	1	0	0	1	1	0	1	0	6
P01023	Q9Y2H9	1	1	0	0	0	0	1	0	1	1	0	0	1	6
P00533	Q9Y2H9	1	1	0	0	0	0	1	0	1	1	0	0	1	6
P00533	Q15003	1	1	0	1	0	1	0	0	1	0	0	1	0	6
O95997	Q969F8	1	0	0	0	1	1	1	0	1	0	0	0	1	6
O95948	Q9UGL1	1	1	0	1	0	0	0	0	1	1	1	0	0	6
O95777	Q8N726	0	1	0	0	0	1	1	1	0	0	1	1	0	6
O95750	P22455	1	0	1	1	1	0	0	0	0	1	0	1	0	6
O95716	Q9Y2H9	1	1	0	0	0	0	1	0	1	1	0	0	1	6
O95714	P35453	0	0	0	1	1	1	0	0	1	1	0	1	0	6
O95644	P35453	0	0	0	1	1	1	0	0	1	1	0	1	0	6
O95503	P31274	1	0	0	1	0	0	0	1	1	0	0	1	1	6
O95425	Q15058	0	1	0	0	1	1	1	0	0	0	1	0	1	6
O95409	Q01860	1	0	1	0	0	0	1	0	1	0	1	1	0	6
O95347	Q15003	1	1	0	1	0	1	0	0	1	0	0	1	0	6
O95219	P43360	1	1	1	0	0	0	0	0	1	1	0	1	0	6
O95155	Q8N726	0	1	0	0	0	1	1	1	0	0	1	1	0	6
O94992	Q15003	1	1	0	1	0	1	0	0	1	0	0	1	0	6
O94972	Q15398	0	1	0	0	0	1	1	1	0	0	1	0	1	6
O76081	P48023	1	0	0	0	1	1	1	0	1	1	0	0	0	6
O76081	P32242	1	0	0	1	1	0	1	0	1	1	0	0	0	6
O75928	Q8N726	0	1	0	0	0	1	1	1	0	0	1	1	0	6
O75923	Q5FBB7	0	0	0	0	0	1	1	0	1	1	1	1	0	6
O75695	Q15003	1	1	0	1	0	1	0	0	1	0	0	1	0	6
O75531	P08779	1	0	1	0	0	0	0	0	1	1	0	1	1	6
O75496	Q8N726	0	1	0	0	0	1	1	1	0	0	1	1	0	6
O75419	Q7L590	1	1	0	0	0	1	1	0	0	1	0	1	0	6
O75419	Q13415	1	0	0	1	0	1	1	0	0	1	0	1	0	6
O75398	Q8N726	0	1	0	0	0	1	1	1	0	0	1	1	0	6
O75386	P43360	1	1	1	0	0	0	0	0	1	1	0	1	0	6
O75348	P43360	1	1	1	0	0	0	0	0	1	1	0	1	0	6
O75340	Q8N726	0	1	0	0	0	1	1	1	0	0	1	1	0	6
O75340	P43355	1	1	0	1	0	0	0	1	1	1	0	0	0	6
O75179	P43355	1	1	0	1	0	0	0	1	1	1	0	0	0	6
O75147	Q15058	0	1	0	0	1	1	1	0	0	0	1	0	1	6
O60711	P31274	1	0	0	1	0	0	0	1	1	0	0	1	1	6
O60566	P51955	1	1	0	0	0	0	1	0	1	1	0	1	0	6
O60502	Q9Y2H9	1	1	0	0	0	0	1	0	1	1	0	0	1	6
O60478	Q15003	1	1	0	1	0	1	0	0	1	0	0	1	0	6
O60333	P43355	1	1	0	1	0	0	0	1	1	1	0	0	0	6
O60308	Q15058	0	1	0	0	1	1	1	0	0	0	1	0	1	6
O60287	Q15058	0	1	0	0	1	1	1	0	0	0	1	0	1	6
O60260	P51955	1	1	0	0	0	0	1	0	1	1	0	1	0	6
O43929	Q8N726	0	1	0	0	0	1	1	1	0	0	1	1	0	6
O43865	P31274	1	0	0	1	0	0	0	1	1	0	0	1	1	6
O43765	P22466	1	1	0	0	0	0	1	0	1	1	1	0	0	6
O43707	Q8N726	0	1	0	0	0	1	1	1	0	0	1	1	0	6
O43639	P43360	1	1	1	0	0	0	0	0	1	1	0	1	0	6
O43638	P35453	0	0	0	1	1	1	0	0	1	1	0	1	0	6
O43493	P20337	1	1	0	1	0	0	0	0	1	1	0	1	0	6
O43303	Q15003	1	1	0	1	0	1	0	0	1	0	0	1	0	6
O43291	Q15058	0	1	0	0	1	1	1	0	0	0	1	0	1	6
O43291	P56282	0	1	0	0	0	0	1	1	1	1	0	0	1	6
O43248	Q9Y5K6	1	0	1	1	0	0	0	0	1	1	0	1	0	6
O43248	Q9UQL6	1	0	1	1	0	0	0	0	1	1	0	1	0	6
O43248	Q15717	1	0	1	1	0	0	0	0	1	1	0	1	0	6
O43248	Q15306	1	0	1	1	0	0	0	0	1	1	0	1	0	6
O43248	P84022	1	0	1	1	0	0	0	0	1	1	0	1	0	6
O43248	P40763	1	0	1	1	0	0	0	0	1	1	0	1	0	6
O43248	P32780	1	0	1	1	0	0	0	0	1	1	0	1	0	6
O43149	Q15003	1	1	0	1	0	1	0	0	1	0	0	1	0	6
O15514	P31274	1	0	0	1	0	0	0	1	1	0	0	1	1	6
O15379	P43356	1	0	1	1	0	0	0	0	1	1	0	1	0	6
O15357	P08779	1	0	1	0	0	0	0	0	1	1	0	1	1	6
O15350	Q9Y3I0	1	1	0	0	1	1	1	0	0	0	0	1	0	6
O15350	Q9Y294	1	1	0	0	1	1	1	0	0	0	0	1	0	6
O15350	Q9UQ16	1	1	0	0	1	1	1	0	0	0	0	1	0	6
O15350	Q9UM63	1	1	0	0	1	1	1	0	0	0	0	1	0	6
O15350	Q9UL18	1	1	0	0	1	1	1	0	0	0	0	1	0	6
O15350	Q9UKV8	1	1	0	0	1	1	1	0	0	0	0	1	0	6
O15350	Q9UER7	1	1	0	0	1	1	1	0	0	0	0	1	0	6
O15350	Q9UBK7	1	1	0	0	1	1	1	0	0	0	0	1	0	6
O15350	Q9P2P5	1	1	0	0	1	1	1	0	0	0	0	1	0	6
O15350	Q9NZC7	1	1	0	0	1	1	1	0	0	0	0	1	0	6
O15350	Q9H422	1	1	0	0	1	1	1	0	0	0	0	1	0	6
O15350	Q9H410	1	1	0	0	1	1	1	0	0	0	0	1	0	6
O15350	Q9H2X6	1	1	0	0	1	1	1	0	0	0	0	1	0	6
O15350	Q9H211	1	1	0	0	1	1	1	0	0	0	0	1	0	6
O15350	Q9H0F5	1	1	0	0	1	1	1	0	0	0	0	1	0	6
O15350	Q9H0E9	1	1	0	0	1	1	1	0	0	0	0	1	0	6
O15350	Q9BZG8	1	1	0	0	1	1	1	0	0	0	0	1	0	6
O15350	Q9BUQ8	1	1	0	0	1	1	1	0	0	0	0	1	0	6
O15350	Q9BTL4	1	1	0	0	1	1	1	0	0	0	0	1	0	6
O15350	Q99471	1	1	0	0	1	1	1	0	0	0	0	1	0	6
O15350	Q96S59	1	1	0	0	1	1	1	0	0	0	0	1	0	6
O15350	Q96PM5	1	1	0	0	1	1	1	0	0	0	0	1	0	6
O15350	Q96LA8	1	1	0	0	1	1	1	0	0	0	0	1	0	6
O15350	Q96J02	1	1	0	0	1	1	1	0	0	0	0	1	0	6
O15350	Q96EB6	1	1	0	0	1	1	1	0	0	0	0	1	0	6
O15350	Q96BD6	1	1	0	0	1	1	1	0	0	0	0	1	0	6
O15350	Q969V5	1	1	0	0	1	1	1	0	0	0	0	1	0	6
O15350	Q92993	1	1	0	0	1	1	1	0	0	0	0	1	0	6
O15350	Q92925	1	1	0	0	1	1	1	0	0	0	0	1	0	6
O15350	Q92831	1	1	0	0	1	1	1	0	0	0	0	1	0	6
O15350	Q92793	1	1	0	0	1	1	1	0	0	0	0	1	0	6
O15350	Q8WVM7	1	1	0	0	1	1	1	0	0	0	0	1	0	6
O15350	Q8IZT6	1	1	0	0	1	1	1	0	0	0	0	1	0	6
O15350	Q7Z4G4	1	1	0	0	1	1	1	0	0	0	0	1	0	6
O15350	Q7Z392	1	1	0	0	1	1	1	0	0	0	0	1	0	6
O15350	Q6UVJ0	1	1	0	0	1	1	1	0	0	0	0	1	0	6
O15350	Q6EMB2	1	1	0	0	1	1	1	0	0	0	0	1	0	6
O15350	Q5VWQ8	1	1	0	0	1	1	1	0	0	0	0	1	0	6
O15350	Q2M296	1	1	0	0	1	1	1	0	0	0	0	1	0	6
O15350	Q16531	1	1	0	0	1	1	1	0	0	0	0	1	0	6
O15350	Q13952	1	1	0	0	1	1	1	0	0	0	0	1	0	6
O15350	Q13616	1	1	0	0	1	1	1	0	0	0	0	1	0	6
O15350	Q13569	1	1	0	0	1	1	1	0	0	0	0	1	0	6
O15350	Q13547	1	1	0	0	1	1	1	0	0	0	0	1	0	6
O15350	Q13526	1	1	0	0	1	1	1	0	0	0	0	1	0	6
O15350	Q13257	1	1	0	0	1	1	1	0	0	0	0	1	0	6
O15350	Q13049	1	1	0	0	1	1	1	0	0	0	0	1	0	6
O15350	Q12888	1	1	0	0	1	1	1	0	0	0	0	1	0	6
O15350	Q12873	1	1	0	0	1	1	1	0	0	0	0	1	0	6
O15350	Q12834	1	1	0	0	1	1	1	0	0	0	0	1	0	6
O15350	Q09472	1	1	0	0	1	1	1	0	0	0	0	1	0	6
O15350	Q07912	1	1	0	0	1	1	1	0	0	0	0	1	0	6
O15350	Q03701	1	1	0	0	1	1	1	0	0	0	0	1	0	6
O15350	Q00987	1	1	0	0	1	1	1	0	0	0	0	1	0	6
O15350	P63279	1	1	0	0	1	1	1	0	0	0	0	1	0	6
O15350	P63165	1	1	0	0	1	1	1	0	0	0	0	1	0	6
O15350	P62263	1	1	0	0	1	1	1	0	0	0	0	1	0	6
O15350	P58340	1	1	0	0	1	1	1	0	0	0	0	1	0	6
O15350	P51959	1	1	0	0	1	1	1	0	0	0	0	1	0	6
O15350	P46937	1	1	0	0	1	1	1	0	0	0	0	1	0	6
O15350	P46934	1	1	0	0	1	1	1	0	0	0	0	1	0	6
O15350	P46777	1	1	0	0	1	1	1	0	0	0	0	1	0	6
O15350	P42704	1	1	0	0	1	1	1	0	0	0	0	1	0	6
O15350	P38646	1	1	0	0	1	1	1	0	0	0	0	1	0	6
O15350	P38398	1	1	0	0	1	1	1	0	0	0	0	1	0	6
O15350	P37837	1	1	0	0	1	1	1	0	0	0	0	1	0	6
O15350	P35637	1	1	0	0	1	1	1	0	0	0	0	1	0	6
O15350	P26367	1	1	0	0	1	1	1	0	0	0	0	1	0	6
O15350	P25208	1	1	0	0	1	1	1	0	0	0	0	1	0	6
O15350	P24941	1	1	0	0	1	1	1	0	0	0	0	1	0	6
O15350	P24864	1	1	0	0	1	1	1	0	0	0	0	1	0	6
O15350	P24844	1	1	0	0	1	1	1	0	0	0	0	1	0	6
O15350	P24385	1	1	0	0	1	1	1	0	0	0	0	1	0	6
O15350	P23526	1	1	0	0	1	1	1	0	0	0	0	1	0	6
O15350	P20248	1	1	0	0	1	1	1	0	0	0	0	1	0	6
O15350	P17612	1	1	0	0	1	1	1	0	0	0	0	1	0	6
O15350	P14635	1	1	0	0	1	1	1	0	0	0	0	1	0	6
O15350	P11766	1	1	0	0	1	1	1	0	0	0	0	1	0	6
O15350	P0C2W1	1	1	0	0	1	1	1	0	0	0	0	1	0	6
O15350	P09429	1	1	0	0	1	1	1	0	0	0	0	1	0	6
O15350	P06753	1	1	0	0	1	1	1	0	0	0	0	1	0	6
O15350	P06400	1	1	0	0	1	1	1	0	0	0	0	1	0	6
O15350	P04637	1	1	0	0	1	1	1	0	0	0	0	1	0	6
O15350	P01106	1	1	0	0	1	1	1	0	0	0	0	1	0	6
O15350	P00519	1	1	0	0	1	1	1	0	0	0	0	1	0	6
O15350	O95995	1	1	0	0	1	1	1	0	0	0	0	1	0	6
O15350	O95155	1	1	0	0	1	1	1	0	0	0	0	1	0	6
O15350	O75190	1	1	0	0	1	1	1	0	0	0	0	1	0	6
O15350	O60566	1	1	0	0	1	1	1	0	0	0	0	1	0	6
O15350	O60563	1	1	0	0	1	1	1	0	0	0	0	1	0	6
O15350	O60341	1	1	0	0	1	1	1	0	0	0	0	1	0	6
O15304	Q8N726	0	1	0	0	0	1	1	1	0	0	1	1	0	6
O15234	Q8N726	0	1	0	0	0	1	1	1	0	0	1	1	0	6
O15155	P43360	1	1	1	0	0	0	0	0	1	1	0	1	0	6
O15151	Q8N726	0	1	0	0	0	1	1	1	0	0	1	1	0	6
O15151	P43355	1	1	0	1	0	0	0	1	1	1	0	0	0	6
O15151	O15350	1	1	0	0	1	1	1	0	0	0	0	1	0	6
O15127	Q15003	1	1	0	1	0	1	0	0	1	0	0	1	0	6
O15111	O15350	1	1	0	0	1	1	1	0	0	0	0	1	0	6
O15083	P10242	1	0	0	0	1	1	1	0	1	0	1	0	0	6
O14980	O15350	1	1	0	0	1	1	1	0	0	0	0	1	0	6
O14965	Q8N726	0	1	0	0	0	1	1	1	0	0	1	1	0	6
O14965	Q15398	0	1	0	0	0	1	1	1	0	0	1	0	1	6
O14965	O15350	1	1	0	0	1	1	1	0	0	0	0	1	0	6
O14879	Q9Y2H9	1	1	0	0	0	0	1	0	1	1	0	0	1	6
O14777	P51955	1	1	0	0	0	0	1	0	1	1	0	1	0	6
O14757	P51955	1	1	0	0	0	0	1	0	1	1	0	1	0	6
O14730	P43360	1	1	1	0	0	0	0	0	1	1	0	1	0	6
O14543	Q9UP52	1	1	1	0	0	1	1	0	1	0	0	0	0	6
O14530	P43360	1	1	1	0	0	0	0	0	1	1	0	1	0	6
O00471	P43360	1	1	1	0	0	0	0	0	1	1	0	1	0	6
O00470	O43248	1	0	1	1	0	0	0	0	1	1	0	1	0	6
O00463	Q07011	1	1	0	1	0	1	1	0	0	0	0	1	0	6
O00459	P08779	1	0	1	0	0	0	0	0	1	1	0	1	1	6
O00445	Q8NEY4	1	0	0	1	0	0	1	0	1	1	0	0	1	6
O00445	P21579	1	0	0	1	0	0	1	0	1	1	0	0	1	6
O00445	P19388	1	0	0	1	0	0	1	0	1	1	0	0	1	6
O00429	P43355	1	1	0	1	0	0	0	1	1	1	0	0	0	6
O00425	Q9NZI8	1	0	0	1	0	0	1	0	1	1	0	1	0	6
O00358	P31276	1	0	0	1	0	0	1	0	1	1	0	1	0	6
O00311	Q8N726	0	1	0	0	0	1	1	1	0	0	1	1	0	6
O00159	Q8N726	0	1	0	0	0	1	1	1	0	0	1	1	0	6
O00154	P43360	1	1	1	0	0	0	0	0	1	1	0	1	0	6
O00141	P43355	1	1	0	1	0	0	0	1	1	1	0	0	0	6
A6NJU9	O15350	1	0	1	0	1	1	1	0	0	0	0	1	0	6
A5A3E0	O60663	1	0	0	0	0	0	1	0	1	1	1	1	0	6
Q9NZI8	Q9Y6Y0	1	0	0	1	0	0	0	0	1	1	0	1	0	5
Q9NZI8	Q9Y6M1	1	0	0	1	0	0	0	0	1	1	0	1	0	5
Q9NZI8	Q9Y297	1	0	0	1	0	0	0	0	1	1	0	1	0	5
Q9NZI8	Q9UQL6	1	0	0	1	0	0	0	0	1	1	0	1	0	5
Q9NZI8	Q9UHX1	1	0	0	1	0	0	0	0	1	1	0	1	0	5
Q9NZI8	Q9UHC7	1	0	0	1	0	0	0	0	1	1	0	1	0	5
Q9NZI8	Q9UGJ1	1	0	0	1	0	0	0	0	1	1	0	1	0	5
Q9NZI8	Q9UBU9	1	0	0	1	0	0	0	0	1	1	0	1	0	5
Q9NZI8	Q9UBS0	1	0	0	1	0	0	0	0	1	1	0	1	0	5
Q9NZC7	Q9NZI8	1	0	0	1	0	0	0	0	1	1	0	1	0	5
Q9NVX0	Q9NZI8	1	0	0	1	0	0	0	0	1	1	0	1	0	5
Q9NRJ3	Q9UNE7	0	0	0	0	1	0	1	0	1	0	1	0	1	5
Q9NRD1	Q9NZI8	1	0	0	1	0	0	0	0	1	1	0	1	0	5
Q9HCK5	Q9NZI8	1	0	0	1	0	0	0	0	1	1	0	1	0	5
Q9HCE1	Q9NZI8	1	0	0	1	0	0	0	0	1	1	0	1	0	5
Q9HC52	Q9NZI8	1	0	0	1	0	0	0	0	1	1	0	1	0	5
Q9H4K1	Q9Y620	1	1	0	0	0	0	1	0	1	0	0	1	0	5
Q9H4K1	Q9Y2I6	1	1	0	0	0	0	1	0	1	0	0	1	0	5
Q9H4K1	Q9UHY1	1	1	0	0	0	0	1	0	1	0	0	1	0	5
Q9H4K1	Q9NSU2	1	1	0	0	0	0	1	0	1	0	0	1	0	5
Q9H3D4	Q9NZI8	1	0	0	1	0	0	0	0	1	1	0	1	0	5
Q9H0W5	Q9NZI8	1	0	0	1	0	0	0	0	1	1	0	1	0	5
Q9BZY9	Q9Y6K9	1	0	0	0	0	0	1	1	1	0	0	0	1	5
Q9BZY9	Q9Y2X8	1	0	0	0	0	0	1	1	1	0	0	0	1	5
Q9BZY9	Q9NXX6	1	0	0	0	0	0	1	1	1	0	0	0	1	5
Q9BWH6	Q9NZI8	1	0	0	1	0	0	0	0	1	1	0	1	0	5
Q9BV73	Q9NZI8	1	0	0	1	0	0	0	0	1	1	0	1	0	5
Q9BSJ6	Q9Y2D8	1	0	0	1	0	0	1	0	1	1	0	0	0	5
Q9BSJ2	Q9NZI8	1	0	0	1	0	0	0	0	1	1	0	1	0	5
Q99626	Q9UGL1	1	0	0	1	0	0	0	0	1	1	0	1	0	5
Q96N16	Q9UBS5	0	1	0	0	1	1	1	0	0	0	0	1	0	5
Q96LR5	Q9BZY9	1	0	0	0	0	0	1	1	1	0	0	0	1	5
Q96KN7	Q9Y5S9	0	0	0	0	1	1	1	0	0	0	1	0	1	5
Q96KN7	Q9Y3M9	0	0	0	0	1	1	1	0	0	0	1	0	1	5
Q96KN7	Q9UPQ9	0	0	0	0	1	1	1	0	0	0	1	0	1	5
Q96KN7	Q9UPN4	0	0	0	0	1	1	1	0	0	0	1	0	1	5
Q96KN7	Q9P2D0	0	0	0	0	1	1	1	0	0	0	1	0	1	5
Q96KN7	Q9P0N9	0	0	0	0	1	1	1	0	0	0	1	0	1	5
Q96KN7	Q9NX63	0	0	0	0	1	1	1	0	0	0	1	0	1	5
Q96KN7	Q9NQ87	0	0	0	0	1	1	1	0	0	0	1	0	1	5
Q96KN7	Q9HC52	0	0	0	0	1	1	1	0	0	0	1	0	1	5
Q96KN7	Q9H3U1	0	0	0	0	1	1	1	0	0	0	1	0	1	5
Q96KN7	Q9BY89	0	0	0	0	1	1	1	0	0	0	1	0	1	5
Q96KN7	Q9BWG6	0	0	0	0	1	1	1	0	0	0	1	0	1	5
Q96KN7	Q9BT25	0	0	0	0	1	1	1	0	0	0	1	0	1	5
Q96KN7	Q9BRX9	0	0	0	0	1	1	1	0	0	0	1	0	1	5
Q96KN7	Q9BRR8	0	0	0	0	1	1	1	0	0	0	1	0	1	5
Q96KN7	Q99733	0	0	0	0	1	1	1	0	0	0	1	0	1	5
Q96KN7	Q96RU7	0	0	0	0	1	1	1	0	0	0	1	0	1	5
Q96KN7	Q96P70	0	0	0	0	1	1	1	0	0	0	1	0	1	5
Q96KN7	Q96LB3	0	0	0	0	1	1	1	0	0	0	1	0	1	5
Q96JP0	Q96KN7	0	0	0	0	1	1	1	0	0	0	1	0	1	5
Q96HE9	Q9Y3C1	0	0	0	1	0	0	1	0	1	1	0	1	0	5
Q96HE9	Q9Y221	0	0	0	1	0	0	1	0	1	1	0	1	0	5
Q96HE9	Q9UNX3	0	0	0	1	0	0	1	0	1	1	0	1	0	5
Q96HE9	Q9UHA3	0	0	0	1	0	0	1	0	1	1	0	1	0	5
Q96HE9	Q9NZM5	0	0	0	1	0	0	1	0	1	1	0	1	0	5
Q96HE9	Q9NX58	0	0	0	1	0	0	1	0	1	1	0	1	0	5
Q96HE9	Q9NWT1	0	0	0	1	0	0	1	0	1	1	0	1	0	5
Q96HE9	Q9NW13	0	0	0	1	0	0	1	0	1	1	0	1	0	5
Q96HE9	Q9NUL3	0	0	0	1	0	0	1	0	1	1	0	1	0	5
Q96HE9	Q9NUD5	0	0	0	1	0	0	1	0	1	1	0	1	0	5
Q96HE9	Q9HCE1	0	0	0	1	0	0	1	0	1	1	0	1	0	5
Q96HE9	Q9H8H2	0	0	0	1	0	0	1	0	1	1	0	1	0	5
Q96HE9	Q9H7B2	0	0	0	1	0	0	1	0	1	1	0	1	0	5
Q96HE9	Q9H6F5	0	0	0	1	0	0	1	0	1	1	0	1	0	5
Q96HE9	Q9GZR7	0	0	0	1	0	0	1	0	1	1	0	1	0	5
Q96HE9	Q9GZR2	0	0	0	1	0	0	1	0	1	1	0	1	0	5
Q96HE9	Q9BVI4	0	0	0	1	0	0	1	0	1	1	0	1	0	5
Q96HE9	Q9BRU9	0	0	0	1	0	0	1	0	1	1	0	1	0	5
Q96HE9	Q9BRT6	0	0	0	1	0	0	1	0	1	1	0	1	0	5
Q96HE9	Q9BRJ6	0	0	0	1	0	0	1	0	1	1	0	1	0	5
Q96HE9	Q9BQG0	0	0	0	1	0	0	1	0	1	1	0	1	0	5
Q96HE9	Q99848	0	0	0	1	0	0	1	0	1	1	0	1	0	5
Q96HE9	Q99575	0	0	0	1	0	0	1	0	1	1	0	1	0	5
Q96HE9	Q96ME7	0	0	0	1	0	0	1	0	1	1	0	1	0	5
Q96HE9	Q96K58	0	0	0	1	0	0	1	0	1	1	0	1	0	5
Q96GQ7	Q96HE9	0	0	0	1	0	0	1	0	1	1	0	1	0	5
Q96GM5	Q99626	1	0	0	1	0	0	0	0	1	1	0	1	0	5
Q96EZ4	Q9NRG1	0	0	0	0	0	1	1	0	1	1	0	0	1	5
Q96EP1	Q96KB5	0	1	0	0	0	0	1	1	0	0	0	1	1	5
Q96ED9	Q9H4K1	1	1	0	0	0	0	1	0	1	0	0	1	0	5
Q96DV4	Q96HE9	0	0	0	1	0	0	1	0	1	1	0	1	0	5
Q96D59	Q9HD26	1	0	0	0	0	1	0	0	1	1	0	0	1	5
Q96D59	Q9BQD3	1	0	0	0	0	1	0	0	1	1	0	0	1	5
Q96CW5	Q9NZI8	1	0	0	1	0	0	0	0	1	1	0	1	0	5
Q96CS4	Q96HE9	0	0	0	1	0	0	1	0	1	1	0	1	0	5
Q96C92	Q96KN7	0	0	0	0	1	1	1	0	0	0	1	0	1	5
Q96BJ8	Q9NS87	1	1	0	0	0	0	1	0	0	1	0	1	0	5
Q96B02	Q9BZY9	1	0	0	0	0	0	1	1	1	0	0	0	1	5
Q96AY2	Q9NYU2	1	0	0	0	0	1	1	1	1	0	0	0	0	5
Q96AY2	Q9BYG5	1	0	0	0	0	1	1	1	1	0	0	0	0	5
Q96AY2	Q9BQ83	1	0	0	0	0	1	1	1	1	0	0	0	0	5
Q96AY2	Q99523	1	0	0	0	0	1	1	1	1	0	0	0	0	5
Q96AY2	Q96SY0	1	0	0	0	0	1	1	1	1	0	0	0	0	5
Q96AY2	Q96NY9	1	0	0	0	0	1	1	1	1	0	0	0	0	5
Q96AY2	Q96EV2	1	0	0	0	0	1	1	1	1	0	0	0	0	5
Q969Y2	Q9H4K1	1	1	0	0	0	0	1	0	1	0	0	1	0	5
Q969V6	Q96KN7	0	0	0	0	1	1	1	0	0	0	1	0	1	5
Q93079	Q9H040	1	1	0	1	0	0	0	0	0	1	0	0	1	5
Q93079	Q969P0	1	1	0	1	0	0	0	0	0	1	0	0	1	5
Q93034	Q9NZI8	1	0	0	1	0	0	0	0	1	1	0	1	0	5
Q93009	Q9BZY9	1	0	0	0	0	0	1	1	1	0	0	0	1	5
Q92905	Q9NZI8	1	0	0	1	0	0	0	0	1	1	0	1	0	5
Q92900	Q96HE9	0	0	0	1	0	0	1	0	1	1	0	1	0	5
Q92834	Q96KN7	0	0	0	0	1	1	1	0	0	0	1	0	1	5
Q92698	Q9P2P5	1	1	0	0	0	0	0	0	1	1	0	1	0	5
Q92698	Q96HA8	1	1	0	0	0	0	0	0	1	1	0	1	0	5
Q92698	Q96EQ0	1	1	0	0	0	0	0	0	1	1	0	1	0	5
Q92643	Q9BZM5	1	1	1	0	0	0	0	0	0	0	1	1	0	5
Q8WZ79	Q9UBS9	0	0	0	0	1	1	1	0	0	0	1	0	1	5
Q8WZ79	Q9H497	0	0	0	0	1	1	1	0	0	0	1	0	1	5
Q8WZ79	Q9BYJ9	0	0	0	0	1	1	1	0	0	0	1	0	1	5
Q8WZ79	Q96RG2	0	0	0	0	1	1	1	0	0	0	1	0	1	5
Q8WXI9	Q96KN7	0	0	0	0	1	1	1	0	0	0	1	0	1	5
Q8WXG9	Q8WZ79	0	0	0	0	1	1	1	0	0	0	1	0	1	5
Q8WTT2	Q96HE9	0	0	0	1	0	0	1	0	1	1	0	1	0	5
Q8WTP8	Q96KN7	0	0	0	0	1	1	1	0	0	0	1	0	1	5
Q8TDN6	Q96HE9	0	0	0	1	0	0	1	0	1	1	0	1	0	5
Q8TDM6	Q96KN7	0	0	0	0	1	1	1	0	0	0	1	0	1	5
Q8TBZ8	Q96KN7	0	0	0	0	1	1	1	0	0	0	1	0	1	5
Q8TBF4	Q96HE9	0	0	0	1	0	0	1	0	1	1	0	1	0	5
Q8TAU3	Q96KN7	0	0	0	0	1	1	1	0	0	0	1	0	1	5
Q8TAI7	Q9UKG1	1	1	0	0	0	1	1	1	0	0	0	0	0	5
Q8NI77	Q96AY2	1	0	0	0	0	1	1	1	1	0	0	0	0	5
Q8NHU6	Q9BSJ6	1	0	0	1	0	0	1	0	1	1	0	0	0	5
Q8NHQ1	Q9BSJ6	1	0	0	1	0	0	1	0	1	1	0	0	0	5
Q8NG27	Q9H4K1	1	1	0	0	0	0	1	0	1	0	0	1	0	5
Q8NCG5	Q96C86	1	0	1	0	1	0	1	0	0	0	0	1	0	5
Q8NCD3	Q9Y230	0	0	0	0	1	0	1	1	0	0	0	1	1	5
Q8NB90	Q8WZ79	0	0	0	0	1	1	1	0	0	0	1	0	1	5
Q8N9T8	Q96HE9	0	0	0	1	0	0	1	0	1	1	0	1	0	5
Q8N726	Q9UQ88	0	0	0	0	0	1	1	0	1	0	1	1	0	5
Q8N726	Q9H3D4	0	1	0	0	0	1	1	0	0	0	1	1	0	5
Q8N5L8	Q96KN7	0	0	0	0	1	1	1	0	0	0	1	0	1	5
Q8N350	Q9UKB1	0	0	1	0	0	0	0	0	1	1	0	1	1	5
Q8N137	Q96AY2	1	0	0	0	0	1	1	1	1	0	0	0	0	5
Q8N0S6	Q9NSP4	1	1	0	0	0	1	0	0	0	0	1	1	0	5
Q8IYE0	Q96KN7	0	0	0	0	1	1	1	0	0	0	1	0	1	5
Q8IY92	Q96AY2	1	0	0	0	0	1	1	1	1	0	0	0	0	5
Q8IY81	Q96HE9	0	0	0	1	0	0	1	0	1	1	0	1	0	5
Q8IUH5	Q93079	1	1	0	1	0	0	0	0	0	1	0	0	1	5
Q86X83	Q96KN7	0	0	0	0	1	1	1	0	0	0	1	0	1	5
Q86X19	Q8N350	0	0	1	0	0	0	0	0	1	1	0	1	1	5
Q86VP6	Q9NZI8	1	0	0	1	0	0	0	0	1	1	0	1	0	5
Q86SF2	Q8WZ79	0	0	0	0	1	1	1	0	0	0	1	0	1	5
Q7Z4H7	Q96KN7	0	0	0	0	1	1	1	0	0	0	1	0	1	5
Q7L5N1	Q9H4K1	1	1	0	0	0	0	1	0	1	0	0	1	0	5
Q7L3S4	Q96HE9	0	0	0	1	0	0	1	0	1	1	0	1	0	5
Q7L2K0	Q9UHY8	1	1	0	0	0	0	0	1	1	1	0	0	0	5
Q7L2K0	Q99689	1	1	0	0	0	0	0	1	1	1	0	0	0	5
Q7L2K0	Q7Z3S9	1	1	0	0	0	0	0	1	1	1	0	0	0	5
Q7L2J0	Q9NZI8	1	0	0	1	0	0	0	0	1	1	0	1	0	5
Q7L2E3	Q96HE9	0	0	0	1	0	0	1	0	1	1	0	1	0	5
Q76KP1	Q9UKJ1	0	1	0	0	0	1	1	0	1	1	0	0	0	5
Q71U36	Q8WZ79	0	0	0	0	1	1	1	0	0	0	1	0	1	5
Q709F0	Q9BSJ6	1	0	0	1	0	0	1	0	1	1	0	0	0	5
Q6ZXV5	Q8WZ79	0	0	0	0	1	1	1	0	0	0	1	0	1	5
Q6YFQ2	Q96NE9	1	0	0	0	0	0	1	0	1	1	0	1	0	5
Q6UWE0	Q8IXR5	0	0	0	1	0	0	0	1	1	1	0	0	1	5
Q6UB98	Q9BZM5	1	1	1	0	0	0	0	0	0	0	1	1	0	5
Q6RW13	Q9BSJ6	1	0	0	1	0	0	1	0	1	1	0	0	0	5
Q6PKG0	Q96HE9	0	0	0	1	0	0	1	0	1	1	0	1	0	5
Q6PH85	Q9UBF6	0	0	0	0	1	1	1	0	0	0	1	1	0	5
Q6PH85	Q96GG9	0	0	0	0	1	1	1	0	0	0	1	1	0	5
Q6PH85	Q969M7	0	0	0	0	1	1	1	0	0	0	1	1	0	5
Q6PH85	Q93034	0	0	0	0	1	1	1	0	0	0	1	1	0	5
Q6PH85	Q86VP6	0	0	0	0	1	1	1	0	0	0	1	1	0	5
Q6PB30	Q96SB4	1	0	0	1	0	0	0	0	1	1	0	1	0	5
Q6P597	Q9UQ84	1	0	1	0	0	0	1	0	0	1	0	1	0	5
Q6P444	Q9Y2U9	0	1	0	0	0	0	1	1	0	0	0	1	1	5
Q6P444	Q9UPY3	0	1	0	0	0	0	1	1	0	0	0	1	1	5
Q6P444	Q9UBB9	0	1	0	0	0	0	1	1	0	0	0	1	1	5
Q6P2H3	Q96KN7	0	0	0	0	1	1	1	0	0	0	1	0	1	5
Q6MZM0	Q9UEU0	1	0	1	1	0	0	1	0	0	1	0	0	0	5
Q6MZM0	Q96GX9	1	0	1	1	0	0	1	0	0	1	0	0	0	5
Q6MZM0	Q92871	1	0	1	1	0	0	1	0	0	1	0	0	0	5
Q6MZM0	Q92734	1	0	1	1	0	0	1	0	0	1	0	0	0	5
Q6MZM0	Q8IV20	1	0	1	1	0	0	1	0	0	1	0	0	0	5
Q6MZM0	Q86YN1	1	0	1	1	0	0	1	0	0	1	0	0	0	5
Q6K0P9	Q6MZM0	1	0	1	1	0	0	1	0	0	1	0	0	0	5
Q6IPM2	Q96KN7	0	0	0	0	1	1	1	0	0	0	1	0	1	5
Q6DKK2	Q9BSJ6	1	0	0	1	0	0	1	0	1	1	0	0	0	5
Q6DKI1	Q96HE9	0	0	0	1	0	0	1	0	1	1	0	1	0	5
Q68DK7	Q86X24	0	1	0	1	0	0	0	0	1	1	0	0	1	5
Q63HR2	Q6YFQ2	1	0	0	0	0	0	1	0	1	1	0	1	0	5
Q5VWQ0	Q96HE9	0	0	0	1	0	0	1	0	1	1	0	1	0	5
Q5T4B2	Q8WZ79	0	0	0	0	1	1	1	0	0	0	1	0	1	5
Q5SZK8	Q8WZ79	0	0	0	0	1	1	1	0	0	0	1	0	1	5
Q5SSJ5	Q96HE9	0	0	0	1	0	0	1	0	1	1	0	1	0	5
Q5M775	Q9UHB6	0	0	0	1	1	0	0	0	0	1	1	0	1	5
Q5M775	Q9P2P5	0	0	0	1	1	0	0	0	0	1	1	0	1	5
Q5M775	Q9NQX4	0	0	0	1	1	0	0	0	0	1	1	0	1	5
Q5M775	Q9NQW6	0	0	0	1	1	0	0	0	0	1	1	0	1	5
Q5M775	Q92614	0	0	0	1	1	0	0	0	0	1	1	0	1	5
Q5JTH9	Q96HE9	0	0	0	1	0	0	1	0	1	1	0	1	0	5
Q562F6	Q6MZM0	1	0	1	1	0	0	1	0	0	1	0	0	0	5
Q504Q3	Q9NZI8	1	0	0	1	0	0	0	0	1	1	0	1	0	5
Q49A26	Q96HE9	0	0	0	1	0	0	1	0	1	1	0	1	0	5
Q495W5	Q8WZ79	0	0	0	0	1	1	1	0	0	0	1	0	1	5
Q3V6T2	Q96AY2	1	0	0	0	0	1	1	1	1	0	0	0	0	5
Q2TB10	Q96HE9	0	0	0	1	0	0	1	0	1	1	0	1	0	5
Q2NL82	Q96HE9	0	0	0	1	0	0	1	0	1	1	0	1	0	5
Q2MV58	Q8WZ79	0	0	0	0	1	1	1	0	0	0	1	0	1	5
Q24JP5	Q8WZ79	0	0	0	0	1	1	1	0	0	0	1	0	1	5
Q1MSJ5	Q96KN7	0	0	0	0	1	1	1	0	0	0	1	0	1	5
Q1ED39	Q96HE9	0	0	0	1	0	0	1	0	1	1	0	1	0	5
Q16849	Q9UBY8	1	1	0	0	0	1	0	0	1	1	0	0	0	5
Q16849	Q9NRR5	1	1	0	0	0	1	0	0	1	1	0	0	0	5
Q16643	Q5M775	0	0	0	1	1	0	0	0	0	1	1	0	1	5
Q16537	Q8WZ79	0	0	0	0	1	1	1	0	0	0	1	0	1	5
Q15907	Q6MZM0	1	0	1	1	0	0	1	0	0	1	0	0	0	5
Q15843	Q9NZI8	1	0	0	1	0	0	0	0	1	1	0	1	0	5
Q15834	Q9H4K1	1	1	0	0	0	0	1	0	1	0	0	1	0	5
Q15717	Q9NZI8	1	0	0	1	0	0	0	0	1	1	0	1	0	5
Q15691	Q5M775	0	0	0	1	1	0	0	0	0	1	1	0	1	5
Q15397	Q96HE9	0	1	0	1	0	0	1	0	0	1	0	1	0	5
Q15370	Q6PH85	0	0	0	0	1	1	1	0	0	0	1	1	0	5
Q15361	Q96HE9	0	0	0	1	0	0	1	0	1	1	0	1	0	5
Q15154	Q96KN7	0	0	0	0	1	1	1	0	0	0	1	0	1	5
Q15058	Q9NZQ7	0	1	0	0	1	1	1	0	0	0	1	0	0	5
Q15058	Q96KN7	0	0	0	0	1	1	1	0	0	0	1	0	1	5
Q15058	Q66GS9	0	1	0	0	1	1	1	0	0	0	1	0	0	5
Q15050	Q96HE9	0	0	0	1	0	0	1	0	1	1	0	1	0	5
Q15003	Q9NTJ3	0	1	0	1	0	1	0	0	1	0	0	1	0	5
Q15003	Q8N140	1	1	0	1	0	1	0	0	1	0	0	0	0	5
Q14999	Q9NZI8	1	0	0	1	0	0	0	0	1	1	0	1	0	5
Q14738	Q8WZ79	0	0	0	0	1	1	1	0	0	0	1	0	1	5
Q14674	Q9UK80	0	1	0	0	0	0	0	1	1	0	1	1	0	5
Q14517	Q8WZ79	0	0	0	0	1	1	1	0	0	0	1	0	1	5
Q14209	Q9Y5K5	0	0	0	0	1	1	1	1	0	0	1	0	0	5
Q14209	Q9HCE1	0	0	0	0	1	1	1	1	0	0	1	0	0	5
Q14209	Q99856	0	0	0	0	1	1	1	1	0	0	1	0	0	5
Q14209	Q8N488	0	0	0	0	1	1	1	1	0	0	1	0	0	5
Q14209	Q6PL18	0	0	0	0	1	1	1	1	0	0	1	0	0	5
Q14209	Q15717	0	0	0	0	1	1	1	1	0	0	1	0	0	5
Q14191	Q8N726	0	1	0	0	0	1	1	0	0	0	1	1	0	5
Q14188	Q14209	0	0	0	0	1	1	1	1	0	0	1	0	0	5
Q14186	Q14209	0	0	0	0	1	1	1	1	0	0	1	0	0	5
Q14161	Q14209	0	0	0	0	1	1	1	1	0	0	1	0	0	5
Q13823	Q96HE9	0	0	0	1	0	0	1	0	1	1	0	1	0	5
Q13625	Q96KN7	0	0	0	0	1	1	1	0	0	0	1	0	1	5
Q13620	Q9NZI8	1	0	0	1	0	0	0	0	1	1	0	1	0	5
Q13620	Q6PH85	0	0	0	0	1	1	1	0	0	0	1	1	0	5
Q13619	Q9NZI8	1	0	0	1	0	0	0	0	1	1	0	1	0	5
Q13619	Q6PH85	0	0	0	0	1	1	1	0	0	0	1	1	0	5
Q13618	Q9NZI8	1	0	0	1	0	0	0	0	1	1	0	1	0	5
Q13618	Q6PH85	0	0	0	0	1	1	1	0	0	0	1	1	0	5
Q13618	Q6P444	0	1	0	0	0	0	1	1	0	0	0	1	1	5
Q13617	Q9NZI8	1	0	0	1	0	0	0	0	1	1	0	1	0	5
Q13617	Q6PH85	0	0	0	0	1	1	1	0	0	0	1	1	0	5
Q13616	Q9NZI8	1	0	0	1	0	0	0	0	1	1	0	1	0	5
Q13616	Q6PH85	0	0	0	0	1	1	1	0	0	0	1	1	0	5
Q13610	Q96HE9	0	0	0	1	0	0	1	0	1	1	0	1	0	5
Q13601	Q96HE9	0	0	0	1	0	0	1	0	1	1	0	1	0	5
Q13509	Q9Y6N7	0	1	0	0	0	0	1	0	1	1	0	1	0	5
Q13509	Q9Y4B5	0	1	0	0	0	0	1	0	1	1	0	1	0	5
Q13509	Q9UKG1	0	1	0	0	0	0	1	0	1	1	0	1	0	5
Q13509	Q9UBS0	0	1	0	0	0	0	1	0	1	1	0	1	0	5
Q13509	Q9P289	0	1	0	0	0	0	1	0	1	1	0	1	0	5
Q13509	Q9NVX0	0	1	0	0	0	0	1	0	1	1	0	1	0	5
Q13509	Q9NU22	0	1	0	0	0	0	1	0	1	1	0	1	0	5
Q13509	Q9NRD1	0	1	0	0	0	0	1	0	1	1	0	1	0	5
Q13509	Q9H765	0	1	0	0	0	0	1	0	1	1	0	1	0	5
Q13509	Q9H6X2	0	1	0	0	0	0	1	0	1	1	0	1	0	5
Q13509	Q9H2C0	0	1	0	0	0	0	1	0	1	1	0	1	0	5
Q13509	Q9C0C7	0	1	0	0	0	0	1	0	1	1	0	1	0	5
Q13509	Q9BWD1	0	1	0	0	0	0	1	0	1	1	0	1	0	5
Q13509	Q9BV73	0	1	0	0	0	0	1	0	1	1	0	1	0	5
Q13509	Q9BUU2	0	1	0	0	0	0	1	0	1	1	0	1	0	5
Q13509	Q9BQE3	0	1	0	0	0	0	1	0	1	1	0	1	0	5
Q13509	Q96CS3	0	1	0	0	0	0	1	0	1	1	0	1	0	5
Q13509	Q96AZ1	0	1	0	0	0	0	1	0	1	1	0	1	0	5
Q13509	Q969X0	0	1	0	0	0	0	1	0	1	1	0	1	0	5
Q13509	Q969W0	0	1	0	0	0	0	1	0	1	1	0	1	0	5
Q13509	Q92973	0	1	0	0	0	0	1	0	1	1	0	1	0	5
Q13509	Q8WWQ0	0	1	0	0	0	0	1	0	1	1	0	1	0	5
Q13509	Q8WVB3	0	1	0	0	0	0	1	0	1	1	0	1	0	5
Q13509	Q8TCJ0	0	1	0	0	0	0	1	0	1	1	0	1	0	5
Q13509	Q8N163	0	1	0	0	0	0	1	0	1	1	0	1	0	5
Q13509	Q8IWC1	0	1	0	0	0	0	1	0	1	1	0	1	0	5
Q13509	Q7Z624	0	1	0	0	0	0	1	0	1	1	0	1	0	5
Q13509	Q71U36	0	1	0	0	0	0	1	0	1	1	0	1	0	5
Q13509	Q68CR1	0	1	0	0	0	0	1	0	1	1	0	1	0	5
Q13509	Q16637	0	1	0	0	0	0	1	0	1	1	0	1	0	5
Q13509	Q15717	0	1	0	0	0	0	1	0	1	1	0	1	0	5
Q13509	Q15051	0	1	0	0	0	0	1	0	1	1	0	1	0	5
Q13509	Q15012	0	1	0	0	0	0	1	0	1	1	0	1	0	5
Q13509	Q14103	0	1	0	0	0	0	1	0	1	1	0	1	0	5
Q13509	Q14004	0	1	0	0	0	0	1	0	1	1	0	1	0	5
Q13509	Q13838	0	1	0	0	0	0	1	0	1	1	0	1	0	5
Q13509	Q13618	0	1	0	0	0	0	1	0	1	1	0	1	0	5
Q13509	Q13573	0	1	0	0	0	0	1	0	1	1	0	1	0	5
Q13492	Q9BSJ6	1	0	0	1	0	0	1	0	1	1	0	0	0	5
Q13490	Q9NZI8	1	0	0	1	0	0	0	0	1	1	0	1	0	5
Q13490	Q8WZ79	0	0	0	0	1	1	1	0	0	0	1	0	1	5
Q13435	Q96HE9	0	0	0	1	0	0	1	0	1	1	0	1	0	5
Q13425	Q16849	1	1	0	0	0	1	0	0	1	1	0	0	0	5
Q13418	Q9NZI8	1	0	0	1	0	0	0	0	1	1	0	1	0	5
Q13310	Q96HE9	0	0	0	1	0	0	1	0	1	1	0	1	0	5
Q13286	Q9BX79	1	0	1	0	0	0	0	0	1	1	0	1	0	5
Q13233	Q6PH85	0	0	0	0	1	1	1	0	0	0	1	1	0	5
Q13093	Q16849	1	1	0	0	0	1	0	0	1	1	0	0	0	5
Q13087	Q7Z4N8	1	0	0	1	0	0	0	0	1	0	1	1	0	5
Q13084	Q13509	0	1	0	0	0	0	1	0	1	1	0	1	0	5
Q13057	Q6MZM0	1	0	1	1	0	0	1	0	0	1	0	0	0	5
Q12933	Q9H4K1	1	1	0	0	0	0	1	0	1	0	0	1	0	5
Q12933	Q9BZY9	1	0	0	0	0	0	1	1	1	0	0	0	1	5
Q12933	Q8WZ79	0	0	0	0	1	1	1	0	0	0	1	0	1	5
Q12841	Q8WZ79	0	0	0	0	1	1	1	0	0	0	1	0	1	5
Q12824	Q99626	1	0	0	1	0	0	0	0	1	1	0	1	0	5
Q12800	Q9BSJ6	1	0	0	1	0	0	1	0	1	1	0	0	0	5
Q12788	Q8WZ79	0	0	0	0	1	1	1	0	0	0	1	0	1	5
Q0D2I5	Q96D59	1	0	0	0	0	1	0	0	1	1	0	0	1	5
Q09472	Q99626	1	0	0	1	0	0	0	0	1	1	0	1	0	5
Q08380	Q9Y336	0	1	0	1	0	0	0	0	0	0	1	1	1	5
Q08379	Q6P444	0	1	0	0	0	0	1	1	0	0	0	1	1	5
Q07973	Q9BQ95	0	0	1	1	0	0	0	0	1	1	0	1	0	5
Q07666	Q13509	0	1	0	0	0	0	1	0	1	1	0	1	0	5
Q07157	Q9Y6H8	1	0	1	0	0	0	0	0	0	1	1	1	0	5
Q05586	Q8TCU5	1	0	0	0	1	0	1	0	1	0	0	0	1	5
Q05586	Q8TBB1	1	0	0	0	1	0	1	0	1	0	0	0	1	5
Q05586	Q13813	1	0	0	0	1	0	1	0	1	0	0	0	1	5
Q05586	Q13555	1	0	0	0	1	0	1	0	1	0	0	0	1	5
Q04206	Q99626	1	0	0	1	0	0	0	0	1	1	0	1	0	5
Q03405	Q13509	0	1	0	0	0	0	1	0	1	1	0	1	0	5
Q03164	Q14209	0	0	0	0	1	1	1	1	0	0	1	0	0	5
Q02543	Q9H4K1	1	1	0	0	0	0	1	0	1	0	0	1	0	5
Q01844	Q9ULC6	0	0	0	0	0	1	1	0	1	1	0	0	1	5
Q01844	Q96D59	1	0	0	0	0	1	0	0	1	1	0	0	1	5
Q01094	Q14209	0	0	0	0	1	1	1	1	0	0	1	0	0	5
Q00839	Q9NZI8	1	0	0	1	0	0	0	0	1	1	0	1	0	5
Q00839	Q96AY2	1	0	0	0	0	1	1	1	1	0	0	0	0	5
Q00796	Q96HE9	0	0	0	1	0	0	1	0	1	1	0	1	0	5
Q00577	Q96HE9	0	0	0	1	0	0	1	0	1	1	0	1	0	5
P83876	Q8TAI7	1	1	0	0	0	1	1	1	0	0	0	0	0	5
P78395	Q9Y3C4	1	0	0	0	0	0	0	0	1	0	1	1	1	5
P78395	Q9NXK8	1	0	0	0	0	0	0	0	1	0	1	1	1	5
P78395	Q9NPF4	1	0	0	0	0	0	0	0	1	0	1	1	1	5
P78395	Q9HCE1	1	0	0	0	0	0	0	0	1	0	1	1	1	5
P78395	Q9H9D4	1	0	0	0	0	0	0	0	1	0	1	1	1	5
P78395	Q9H8H0	1	0	0	0	0	0	0	0	1	0	1	1	1	5
P78395	Q9H0D6	1	0	0	0	0	0	0	0	1	0	1	1	1	5
P78395	Q9BXR0	1	0	0	0	0	0	0	0	1	0	1	1	1	5
P78395	Q9BVC4	1	0	0	0	0	0	0	0	1	0	1	1	1	5
P78395	Q96S44	1	0	0	0	0	0	0	0	1	0	1	1	1	5
P78395	Q8WYA0	1	0	0	0	0	0	0	0	1	0	1	1	1	5
P78395	Q6V9R5	1	0	0	0	0	0	0	0	1	0	1	1	1	5
P78395	Q16778	1	0	0	0	0	0	0	0	1	0	1	1	1	5
P78395	Q15370	1	0	0	0	0	0	0	0	1	0	1	1	1	5
P78395	Q15369	1	0	0	0	0	0	0	0	1	0	1	1	1	5
P78395	Q14657	1	0	0	0	0	0	0	0	1	0	1	1	1	5
P78395	Q13617	1	0	0	0	0	0	0	0	1	0	1	1	1	5
P78367	Q96ST3	1	1	0	0	0	0	1	0	0	1	1	0	0	5
P78367	Q16576	1	1	0	0	0	0	1	0	0	1	1	0	0	5
P78367	Q15797	1	1	0	0	0	0	1	0	0	1	1	0	0	5
P78367	Q13547	1	1	0	0	0	0	1	0	0	1	1	0	0	5
P78367	Q13485	1	1	0	0	0	0	1	0	0	1	1	0	0	5
P78367	Q09028	1	1	0	0	0	0	1	0	0	1	1	0	0	5
P78362	Q6PB30	1	0	0	1	0	0	0	0	1	1	0	1	0	5
P78337	Q3V5L5	1	0	0	0	0	1	0	1	0	0	1	0	1	5
P68431	Q9Y6K1	1	1	0	0	0	0	0	1	1	0	0	1	0	5
P68431	Q9Y6J0	1	1	0	0	0	0	0	1	1	0	0	1	0	5
P68431	Q9Y6B2	1	1	0	0	0	0	0	1	1	0	0	1	0	5
P68431	Q9Y657	1	1	0	0	0	0	0	1	1	0	0	1	0	5
P68431	Q9Y5B9	1	1	0	0	0	0	0	1	1	0	0	1	0	5
P68431	Q9Y4K0	1	1	0	0	0	0	0	1	1	0	0	1	0	5
P68431	Q9Y4B6	1	1	0	0	0	0	0	1	1	0	0	1	0	5
P68431	Q9Y3U8	1	1	0	0	0	0	0	1	1	0	0	1	0	5
P68431	Q9Y2X0	1	1	0	0	0	0	0	1	1	0	0	1	0	5
P68431	Q9Y2W1	1	1	0	0	0	0	0	1	1	0	0	1	0	5
P68431	Q9Y2Q9	1	1	0	0	0	0	0	1	1	0	0	1	0	5
P68431	Q9Y2P8	1	1	0	0	0	0	0	1	1	0	0	1	0	5
P68431	Q9Y2H1	1	1	0	0	0	0	0	1	1	0	0	1	0	5
P68431	Q9Y294	1	1	0	0	0	0	0	1	1	0	0	1	0	5
P68431	Q9UQL6	1	1	0	0	0	0	0	1	1	0	0	1	0	5
P68431	Q9UQE7	1	1	0	0	0	0	0	1	1	0	0	1	0	5
P68431	Q9UQ35	1	1	0	0	0	0	0	1	1	0	0	1	0	5
P68431	Q9UPS6	1	1	0	0	0	0	0	1	1	0	0	1	0	5
P68431	Q9UPP1	1	1	0	0	0	0	0	1	1	0	0	1	0	5
P68431	Q9UPN9	1	1	0	0	0	0	0	1	1	0	0	1	0	5
P68431	Q9UNL4	1	1	0	0	0	0	0	1	1	0	0	1	0	5
P68431	Q9UKV3	1	1	0	0	0	0	0	1	1	0	0	1	0	5
P68431	Q9UKM9	1	1	0	0	0	0	0	1	1	0	0	1	0	5
P68431	Q9UIS9	1	1	0	0	0	0	0	1	1	0	0	1	0	5
P68431	Q9UIG0	1	1	0	0	0	0	0	1	1	0	0	1	0	5
P68431	Q9UHJ3	1	1	0	0	0	0	0	1	1	0	0	1	0	5
P68431	Q9UHB6	1	1	0	0	0	0	0	1	1	0	0	1	0	5
P68431	Q9UGN5	1	1	0	0	0	0	0	1	1	0	0	1	0	5
P68431	Q9UER7	1	1	0	0	0	0	0	1	1	0	0	1	0	5
P68431	Q9UBN7	1	1	0	0	0	0	0	1	1	0	0	1	0	5
P68431	Q9UBL3	1	1	0	0	0	0	0	1	1	0	0	1	0	5
P68431	Q9P270	1	1	0	0	0	0	0	1	1	0	0	1	0	5
P68431	Q9P0M6	1	1	0	0	0	0	0	1	1	0	0	1	0	5
P68431	Q9NYL9	1	1	0	0	0	0	0	1	1	0	0	1	0	5
P68431	Q9NYF8	1	1	0	0	0	0	0	1	1	0	0	1	0	5
P68431	Q9NVP2	1	1	0	0	0	0	0	1	1	0	0	1	0	5
P68431	Q9NVM4	1	1	0	0	0	0	0	1	1	0	0	1	0	5
P68431	Q9NRP7	1	1	0	0	0	0	0	1	1	0	0	1	0	5
P68431	Q9NRL2	1	1	0	0	0	0	0	1	1	0	0	1	0	5
P68431	Q9NRA0	1	1	0	0	0	0	0	1	1	0	0	1	0	5
P68431	Q9NR48	1	1	0	0	0	0	0	1	1	0	0	1	0	5
P68431	Q9NR30	1	1	0	0	0	0	0	1	1	0	0	1	0	5
P68431	Q9NQ92	1	1	0	0	0	0	0	1	1	0	0	1	0	5
P68431	Q9NPI1	1	1	0	0	0	0	0	1	1	0	0	1	0	5
P68431	Q9NPG3	1	1	0	0	0	0	0	1	1	0	0	1	0	5
P68431	Q9HAV0	1	1	0	0	0	0	0	1	1	0	0	1	0	5
P68431	Q9H9B1	1	1	0	0	0	0	0	1	1	0	0	1	0	5
P68431	Q9H967	1	1	0	0	0	0	0	1	1	0	0	1	0	5
P68431	Q9H7Z6	1	1	0	0	0	0	0	1	1	0	0	1	0	5
P68431	Q9H6U6	1	1	0	0	0	0	0	1	1	0	0	1	0	5
P68431	Q9H6F5	1	1	0	0	0	0	0	1	1	0	0	1	0	5
P68431	Q9H3R0	1	1	0	0	0	0	0	1	1	0	0	1	0	5
P68431	Q9H3K6	1	1	0	0	0	0	0	1	1	0	0	1	0	5
P68431	Q9H3G5	1	1	0	0	0	0	0	1	1	0	0	1	0	5
P68431	Q9H147	1	1	0	0	0	0	0	1	1	0	0	1	0	5
P68431	Q9H0G5	1	1	0	0	0	0	0	1	1	0	0	1	0	5
P68431	Q9GZT9	1	1	0	0	0	0	0	1	1	0	0	1	0	5
P68431	Q9GZS3	1	1	0	0	0	0	0	1	1	0	0	1	0	5
P68431	Q9BYW2	1	1	0	0	0	0	0	1	1	0	0	1	0	5
P68431	Q9BY41	1	1	0	0	0	0	0	1	1	0	0	1	0	5
P68431	Q9BXS6	1	1	0	0	0	0	0	1	1	0	0	1	0	5
P68431	Q9BWJ5	1	1	0	0	0	0	0	1	1	0	0	1	0	5
P68431	Q9BW19	1	1	0	0	0	0	0	1	1	0	0	1	0	5
P68431	Q9BVI0	1	1	0	0	0	0	0	1	1	0	0	1	0	5
P68431	Q9BUA3	1	1	0	0	0	0	0	1	1	0	0	1	0	5
P68431	Q9BT49	1	1	0	0	0	0	0	1	1	0	0	1	0	5
P68431	Q9BSM1	1	1	0	0	0	0	0	1	1	0	0	1	0	5
P68431	Q9BQA1	1	1	0	0	0	0	0	1	1	0	0	1	0	5
P68431	Q99986	1	1	0	0	0	0	0	1	1	0	0	1	0	5
P68431	Q99873	1	1	0	0	0	0	0	1	1	0	0	1	0	5
P68431	Q99728	1	1	0	1	0	0	0	0	1	0	0	1	0	5
P68431	Q99549	1	1	0	0	0	0	0	1	1	0	0	1	0	5
P68431	Q99417	1	1	0	0	0	0	0	1	1	0	0	1	0	5
P68431	Q96T23	1	1	0	0	0	0	0	1	1	0	0	1	0	5
P68431	Q96SB8	1	1	0	0	0	0	0	1	1	0	0	1	0	5
P68431	Q96QE3	1	1	0	0	0	0	0	1	1	0	0	1	0	5
P68431	Q96NC0	1	1	0	0	0	0	0	1	1	0	0	1	0	5
P68431	Q96ME7	1	1	0	0	0	0	0	1	1	0	0	1	0	5
P68431	Q96L73	1	1	0	0	0	0	0	1	1	0	0	1	0	5
P68431	Q96KM6	1	1	0	0	0	0	0	1	1	0	0	1	0	5
P68431	Q96I25	1	1	0	0	0	0	0	1	1	0	0	1	0	5
P68431	Q96HA7	1	1	0	0	0	0	0	1	1	0	0	1	0	5
P68431	Q96GM5	1	1	0	0	0	0	0	1	1	0	0	1	0	5
P68431	Q96FF9	1	1	0	0	0	0	0	1	1	0	0	1	0	5
P68431	Q96DB2	1	1	0	0	0	0	0	1	1	0	0	1	0	5
P68431	Q96CP2	1	1	0	0	0	0	0	1	1	0	0	1	0	5
P68431	Q96BK5	1	1	0	0	0	0	0	1	1	0	0	1	0	5
P68431	Q969R5	1	1	0	0	0	0	0	1	1	0	0	1	0	5
P68431	Q969P0	1	1	0	0	0	0	0	1	1	0	0	1	0	5
P68431	Q969G3	1	1	0	0	0	0	0	1	1	0	0	1	0	5
P68431	Q92993	1	1	0	0	0	0	0	1	1	0	0	1	0	5
P68431	Q92922	1	1	0	0	0	0	0	1	1	0	0	1	0	5
P68431	Q92878	1	1	0	0	0	0	0	1	1	0	0	1	0	5
P68431	Q92831	1	1	0	0	0	0	0	1	1	0	0	1	0	5
P68431	Q92830	1	1	0	0	0	0	0	1	1	0	0	1	0	5
P68431	Q92804	1	1	0	0	0	0	0	1	1	0	0	1	0	5
P68431	Q92794	1	1	0	0	0	0	0	1	1	0	0	1	0	5
P68431	Q92793	1	1	0	0	0	0	0	1	1	0	0	1	0	5
P68431	Q92688	1	1	0	0	0	0	0	1	1	0	0	1	0	5
P68431	Q8WXX5	1	1	0	0	0	0	0	1	1	0	0	1	0	5
P68431	Q8WXI9	1	1	0	0	0	0	0	1	1	0	0	1	0	5
P68431	Q8WWY3	1	1	0	0	0	0	0	1	1	0	0	1	0	5
P68431	Q8WWQ0	1	1	0	0	0	0	0	1	1	0	0	1	0	5
P68431	Q8WW12	1	1	0	0	0	0	0	1	1	0	0	1	0	5
P68431	Q8WVC0	1	1	0	0	0	0	0	1	1	0	0	1	0	5
P68431	Q8WUP2	1	1	0	0	0	0	0	1	1	0	0	1	0	5
P68431	Q8WUB8	1	1	0	0	0	0	0	1	1	0	0	1	0	5
P68431	Q8WTS6	1	1	0	0	0	0	0	1	1	0	0	1	0	5
P68431	Q8TAQ2	1	1	0	0	0	0	0	1	1	0	0	1	0	5
P68431	Q8TAE8	1	1	0	0	0	0	0	1	1	0	0	1	0	5
P68431	Q8NHM5	1	1	0	0	0	0	0	1	1	0	0	1	0	5
P68431	Q8NFW8	1	1	0	0	0	0	0	1	1	0	0	1	0	5
P68431	Q8NEZ4	1	1	0	0	0	0	0	1	1	0	0	1	0	5
P68431	Q8NCN4	1	1	0	0	0	0	0	1	1	0	0	1	0	5
P68431	Q8NC51	1	1	0	0	0	0	0	1	1	0	0	1	0	5
P68431	Q8N806	1	1	0	0	0	0	0	1	1	0	0	1	0	5
P68431	Q8N7H5	1	1	0	0	0	0	0	1	1	0	0	1	0	5
P68431	Q8N655	1	1	0	0	0	0	0	1	1	0	0	1	0	5
P68431	Q8N5Y2	1	1	0	0	0	0	0	1	1	0	0	1	0	5
P68431	Q8N5C6	1	1	0	0	0	0	0	1	1	0	0	1	0	5
P68431	Q8IXJ6	1	1	0	0	0	0	0	1	1	0	0	1	0	5
P68431	Q8IX12	1	1	0	0	0	0	0	1	1	0	0	1	0	5
P68431	Q8IX03	1	1	0	0	0	0	0	1	1	0	0	1	0	5
P68431	Q8IWY9	1	1	0	0	0	0	0	1	1	0	0	1	0	5
P68431	Q8IWX8	1	1	0	0	0	0	0	1	1	0	0	1	0	5
P68431	Q8IWI9	1	1	0	0	0	0	0	1	1	0	0	1	0	5
P68431	Q8IUH5	1	1	0	0	0	0	0	1	1	0	0	1	0	5
P68431	Q86YP4	1	1	0	0	0	0	0	1	1	0	0	1	0	5
P68431	Q86YC2	1	1	0	0	0	0	0	1	1	0	0	1	0	5
P68431	Q86X55	1	1	0	0	0	0	0	1	1	0	0	1	0	5
P68431	Q86UV5	1	1	0	0	0	0	0	1	1	0	0	1	0	5
P68431	Q86U86	1	1	0	0	0	0	0	1	1	0	0	1	0	5
P68431	Q7RTV0	1	1	0	0	0	0	0	1	1	0	0	1	0	5
P68431	Q7KZ85	1	1	0	0	0	0	0	1	1	0	0	1	0	5
P68431	Q6ZU65	1	1	0	0	0	0	0	1	1	0	0	1	0	5
P68431	Q6ZRQ5	1	1	0	0	0	0	0	1	1	0	0	1	0	5
P68431	Q6PL18	1	1	0	0	0	0	0	1	1	0	0	1	0	5
P68431	Q6PD62	1	1	0	0	0	0	0	1	1	0	0	1	0	5
P68431	Q6P4F7	1	1	0	0	0	0	0	1	1	0	0	1	0	5
P68431	Q6P1J9	1	1	0	0	0	0	0	1	1	0	0	1	0	5
P68431	Q6FI13	1	1	0	0	0	0	0	1	1	0	0	1	0	5
P68431	Q68DK7	1	1	0	0	0	0	0	1	1	0	0	1	0	5
P68431	Q5T6S3	1	1	0	0	0	0	0	1	1	0	0	1	0	5
P68431	Q5T3J3	1	1	0	0	0	0	0	1	1	0	0	1	0	5
P68431	Q5FWF5	1	1	0	0	0	0	0	1	1	0	0	1	0	5
P68431	Q53T94	1	1	0	0	0	0	0	1	1	0	0	1	0	5
P68431	Q53HL2	1	1	0	0	0	0	0	1	1	0	0	1	0	5
P68431	Q53GL7	1	1	0	0	0	0	0	1	1	0	0	1	0	5
P68431	Q49A26	1	1	0	0	0	0	0	1	1	0	0	1	0	5
P68431	Q16875	1	1	0	0	0	0	0	1	1	0	0	1	0	5
P68431	Q16778	1	1	0	0	0	0	0	1	1	0	0	1	0	5
P68431	Q16643	1	1	0	0	0	0	0	1	1	0	0	1	0	5
P68431	Q16629	1	1	0	0	0	0	0	1	1	0	0	1	0	5
P68431	Q16576	1	1	0	0	0	0	0	1	1	0	0	1	0	5
P68431	Q16531	1	1	0	0	0	0	0	1	1	0	0	1	0	5
P68431	Q15723	1	1	0	0	0	0	0	1	1	0	0	1	0	5
P68431	Q15459	1	1	0	0	0	0	0	1	1	0	0	1	0	5
P68431	Q15428	1	1	0	0	0	0	0	1	1	0	0	1	0	5
P68431	Q15393	1	1	0	0	0	0	0	1	1	0	0	1	0	5
P68431	Q15208	1	1	0	0	0	0	0	1	1	0	0	1	0	5
P68431	Q15059	1	1	0	0	0	0	0	1	1	0	0	1	0	5
P68431	Q15047	1	1	0	0	0	0	0	1	1	0	0	1	0	5
P68431	Q15022	1	1	0	0	0	0	0	1	1	0	0	1	0	5
P68431	Q14839	1	1	0	0	0	0	0	1	1	0	0	1	0	5
P68431	Q14807	1	1	0	0	0	0	0	1	1	0	0	1	0	5
P68431	Q14781	1	1	0	0	0	0	0	1	1	0	0	1	0	5
P68431	Q14739	1	1	0	0	0	0	0	1	1	0	0	1	0	5
P68431	Q14692	1	1	0	0	0	0	0	1	1	0	0	1	0	5
P68431	Q14683	1	1	0	0	0	0	0	1	1	0	0	1	0	5
P68431	Q14566	1	1	0	0	0	0	0	1	1	0	0	1	0	5
P68431	Q14149	1	1	0	0	0	0	0	1	1	0	0	1	0	5
P68431	Q13813	1	1	0	0	0	0	0	1	1	0	0	1	0	5
P68431	Q13627	1	1	0	0	0	0	0	1	1	0	0	1	0	5
P68431	Q13619	1	1	0	0	0	0	0	1	1	0	0	1	0	5
P68431	Q13547	1	1	0	0	0	0	0	1	1	0	0	1	0	5
P68431	Q13435	1	1	0	0	0	0	0	1	1	0	0	1	0	5
P68431	Q13428	1	1	0	0	0	0	0	1	1	0	0	1	0	5
P68431	Q13263	1	1	0	0	0	0	0	1	1	0	0	1	0	5
P68431	Q13185	1	1	0	0	0	0	0	1	1	0	0	1	0	5
P68431	Q13153	1	1	0	0	0	0	0	1	1	0	0	1	0	5
P68431	Q13129	1	1	0	0	0	0	0	1	1	0	0	1	0	5
P68431	Q13112	1	1	0	0	0	0	0	1	1	0	0	1	0	5
P68431	Q13111	1	1	0	0	0	0	0	1	1	0	0	1	0	5
P68431	Q13029	1	1	0	0	0	0	0	1	1	0	0	1	0	5
P68431	Q12906	1	1	0	0	0	0	0	1	1	0	0	1	0	5
P68431	Q12888	1	1	0	0	0	0	0	1	1	0	0	1	0	5
P68431	Q12874	1	1	0	0	0	0	0	1	1	0	0	1	0	5
P68431	Q12873	1	1	0	0	0	0	0	1	1	0	0	1	0	5
P68431	Q12830	1	1	0	0	0	0	0	1	1	0	0	1	0	5
P68431	Q09472	1	1	0	0	0	0	0	1	1	0	0	1	0	5
P68431	Q09028	1	1	0	0	0	0	0	1	1	0	0	1	0	5
P68431	Q08945	1	1	0	0	0	0	0	1	1	0	0	1	0	5
P68431	Q07666	1	1	0	0	0	0	0	1	1	0	0	1	0	5
P68431	Q07065	1	1	0	0	0	0	0	1	1	0	0	1	0	5
P68431	Q04837	1	1	0	0	0	0	0	1	1	0	0	1	0	5
P68431	Q03468	1	1	0	0	0	0	0	1	1	0	0	1	0	5
P68431	Q03164	1	1	0	0	0	0	0	1	1	0	0	1	0	5
P68431	Q02241	1	1	0	0	0	0	0	1	1	0	0	1	0	5
P68431	Q01831	1	1	0	0	0	0	0	1	1	0	0	1	0	5
P68431	Q01105	1	1	0	0	0	0	0	1	1	0	0	1	0	5
P68431	Q01082	1	1	0	0	0	0	0	1	1	0	0	1	0	5
P68431	P98175	1	1	0	0	0	0	0	1	1	0	0	1	0	5
P68431	P84098	1	1	0	0	0	0	0	1	1	0	0	1	0	5
P68431	P84090	1	1	0	0	0	0	0	1	1	0	0	1	0	5
P68431	P83916	1	1	0	0	0	0	0	1	1	0	0	1	0	5
P68431	P83731	1	1	0	0	0	0	0	1	1	0	0	1	0	5
P68431	P78347	1	1	0	0	0	0	0	1	1	0	0	1	0	5
P68366	Q8WZ79	0	0	0	0	1	1	1	0	0	0	1	0	1	5
P68366	Q13509	0	1	0	0	0	0	1	0	1	1	0	1	0	5
P68363	Q13509	0	1	0	0	0	0	1	0	1	1	0	1	0	5
P68104	P68431	1	1	0	0	0	0	0	1	1	0	0	1	0	5
P63261	P68431	1	1	0	0	0	0	0	1	1	0	0	1	0	5
P63104	P68431	1	1	0	0	0	0	0	1	1	0	0	1	0	5
P63010	Q9H4K1	1	1	0	0	0	0	1	0	1	0	0	1	0	5
P63000	P68431	1	1	0	0	0	0	0	1	1	0	0	1	0	5
P62993	Q9NZI8	1	0	0	1	0	0	0	0	1	1	0	1	0	5
P62993	Q14209	0	0	0	0	1	1	1	1	0	0	1	0	0	5
P62993	P68431	1	1	0	0	0	0	0	1	1	0	0	1	0	5
P62979	P68431	1	1	0	0	0	0	0	1	1	0	0	1	0	5
P62910	P68431	1	1	0	0	0	0	0	1	1	0	0	1	0	5
P62906	Q96HE9	0	0	0	1	0	0	1	0	1	1	0	1	0	5
P62899	P68431	1	1	0	0	0	0	0	1	1	0	0	1	0	5
P62891	P68431	1	1	0	0	0	0	0	1	1	0	0	1	0	5
P62877	Q6PH85	0	0	0	0	1	1	1	0	0	0	1	1	0	5
P62877	P78395	1	0	0	0	0	0	0	0	1	0	1	1	1	5
P62854	P68431	1	1	0	0	0	0	0	1	1	0	0	1	0	5
P62837	Q9BZY9	1	0	0	0	0	0	1	1	1	0	0	0	1	5
P62807	Q96AY2	1	0	0	0	0	1	1	1	1	0	0	0	0	5
P62805	Q9Y6Q9	0	0	0	0	0	0	1	0	1	1	1	0	1	5
P62805	Q9Y6B2	0	0	0	0	0	0	1	0	1	1	1	0	1	5
P62805	Q9Y5T5	0	0	0	0	0	0	1	0	1	1	1	0	1	5
P62805	Q9Y5K5	0	0	0	0	0	0	1	0	1	1	1	0	1	5
P62805	Q9Y4G8	0	0	0	0	0	0	1	0	1	1	1	0	1	5
P62805	Q9Y468	0	0	0	0	0	0	1	0	1	1	1	0	1	5
P62805	Q9Y3T9	0	0	0	0	0	0	1	0	1	1	1	0	1	5
P62805	Q9Y294	0	0	0	0	0	0	1	0	1	1	1	0	1	5
P62805	Q9UQL6	0	0	0	0	0	0	1	0	1	1	1	0	1	5
P62805	Q9UPP1	0	0	0	0	0	0	1	0	1	1	1	0	1	5
P62805	Q9UNN5	0	0	0	0	0	0	1	0	1	1	1	0	1	5
P62805	Q9UKV0	0	0	0	0	0	0	1	0	1	1	1	0	1	5
P62805	Q9UHJ3	0	0	0	0	0	0	1	0	1	1	1	0	1	5
P62805	Q9UER7	0	0	0	0	0	0	1	0	1	1	1	0	1	5
P62805	Q9UBU9	0	0	0	0	0	0	1	0	1	1	1	0	1	5
P62805	Q9UBN7	0	0	0	0	0	0	1	0	1	1	1	0	1	5
P62805	Q9UBD5	0	0	0	0	0	0	1	0	1	1	1	0	1	5
P62805	Q9P0U4	0	0	0	0	0	0	1	0	1	1	1	0	1	5
P62805	Q9NYB0	0	0	0	0	0	0	1	0	1	1	1	0	1	5
P62805	Q9NY74	0	0	0	0	0	0	1	0	1	1	1	0	1	5
P62805	Q9NWM8	0	0	0	0	0	0	1	0	1	1	1	0	1	5
P62805	Q9NVP2	0	0	0	0	0	0	1	0	1	1	1	0	1	5
P62805	Q9NVM4	0	0	0	0	0	0	1	0	1	1	1	0	1	5
P62805	Q9NRL2	0	0	0	0	0	0	1	0	1	1	1	0	1	5
P62805	Q9NRD1	0	0	0	0	0	0	1	0	1	1	1	0	1	5
P62805	Q9NRC8	0	0	0	0	0	0	1	0	1	1	1	0	1	5
P62805	Q9NQR1	0	0	0	0	0	0	1	0	1	1	1	0	1	5
P62805	Q9NQ92	0	0	0	0	0	0	1	0	1	1	1	0	1	5
P62805	Q9HCI7	0	0	0	0	0	0	1	0	1	1	1	0	1	5
P62805	Q9HCE1	0	0	0	0	0	0	1	0	1	1	1	0	1	5
P62805	Q9HC52	0	0	0	0	0	0	1	0	1	1	1	0	1	5
P62805	Q9H9T3	0	0	0	0	0	0	1	0	1	1	1	0	1	5
P62805	Q9H7Z6	0	0	0	0	0	0	1	0	1	1	1	0	1	5
P62805	Q9H0W5	0	0	0	0	0	0	1	0	1	1	1	0	1	5
P62805	Q9BZK7	0	0	0	0	0	0	1	0	1	1	1	0	1	5
P62805	Q9BY41	0	0	0	0	0	0	1	0	1	1	1	0	1	5
P62805	Q9BW71	0	0	0	0	0	0	1	0	1	1	1	0	1	5
P62805	Q9BVI0	0	0	0	0	0	0	1	0	1	1	1	0	1	5
P62805	Q9BV73	0	0	0	0	0	0	1	0	1	1	1	0	1	5
P62805	Q9BT49	0	0	0	0	0	0	1	0	1	1	1	0	1	5
P62805	Q99873	0	0	0	0	0	0	1	0	1	1	1	0	1	5
P62805	Q99733	0	0	0	0	0	0	1	0	1	1	1	0	1	5
P62805	Q99614	0	0	0	0	0	0	1	0	1	1	1	0	1	5
P62805	Q99496	0	0	0	0	0	0	1	0	1	1	1	0	1	5
P62805	Q96LA8	0	0	0	0	0	0	1	0	1	1	1	0	1	5
P62805	Q96L73	0	0	0	0	0	0	1	0	1	1	1	0	1	5
P62805	Q96DX5	0	0	0	0	0	0	1	0	1	1	1	0	1	5
P62805	Q969R5	0	0	0	0	0	0	1	0	1	1	1	0	1	5
P62805	Q93034	0	0	0	0	0	0	1	0	1	1	1	0	1	5
P62805	Q92993	0	0	0	0	0	0	1	0	1	1	1	0	1	5
P62805	Q92905	0	0	0	0	0	0	1	0	1	1	1	0	1	5
P62805	Q92831	0	0	0	0	0	0	1	0	1	1	1	0	1	5
P62805	Q92830	0	0	0	0	0	0	1	0	1	1	1	0	1	5
P62805	Q92804	0	0	0	0	0	0	1	0	1	1	1	0	1	5
P62805	Q92794	0	0	0	0	0	0	1	0	1	1	1	0	1	5
P62805	Q92793	0	0	0	0	0	0	1	0	1	1	1	0	1	5
P62805	Q92688	0	0	0	0	0	0	1	0	1	1	1	0	1	5
P62805	Q92598	0	0	0	0	0	0	1	0	1	1	1	0	1	5
P62805	Q92547	0	0	0	0	0	0	1	0	1	1	1	0	1	5
P62805	Q8WYA6	0	0	0	0	0	0	1	0	1	1	1	0	1	5
P62805	Q8WXX5	0	0	0	0	0	0	1	0	1	1	1	0	1	5
P62805	Q8WXI9	0	0	0	0	0	0	1	0	1	1	1	0	1	5
P62805	Q8WTS6	0	0	0	0	0	0	1	0	1	1	1	0	1	5
P62805	Q8TDB6	0	0	0	0	0	0	1	0	1	1	1	0	1	5
P62805	Q8NCD3	0	0	0	0	0	0	1	0	1	1	1	0	1	5
P62805	Q8N5Y2	0	0	0	0	0	0	1	0	1	1	1	0	1	5
P62805	Q8IUQ4	0	0	0	0	0	0	1	0	1	1	1	0	1	5
P62805	Q86YP4	0	0	0	0	0	0	1	0	1	1	1	0	1	5
P62805	Q86XR8	0	0	0	0	0	0	1	0	1	1	1	0	1	5
P62805	Q86VP6	0	0	0	0	0	0	1	0	1	1	1	0	1	5
P62805	Q86U86	0	0	0	0	0	0	1	0	1	1	1	0	1	5
P62805	Q7L2Z9	0	0	0	0	0	0	1	0	1	1	1	0	1	5
P62805	Q6PL18	0	0	0	0	0	0	1	0	1	1	1	0	1	5
P62805	Q6NYC1	0	0	0	0	0	0	1	0	1	1	1	0	1	5
P62805	Q5VWG9	0	0	0	0	0	0	1	0	1	1	1	0	1	5
P62805	Q5VTR2	0	0	0	0	0	0	1	0	1	1	1	0	1	5
P62805	Q5QJE6	0	0	0	0	0	0	1	0	1	1	1	0	1	5
P62805	Q53T94	0	0	0	0	0	0	1	0	1	1	1	0	1	5
P62805	Q53GL7	0	0	0	0	0	0	1	0	1	1	1	0	1	5
P62805	Q504Q3	0	0	0	0	0	0	1	0	1	1	1	0	1	5
P62805	Q4FZB7	0	0	0	0	0	0	1	0	1	1	1	0	1	5
P62805	Q16778	0	0	0	0	0	0	1	0	1	1	1	0	1	5
P62805	Q16637	0	0	0	0	0	0	1	0	1	1	1	0	1	5
P62805	Q16576	0	0	0	0	0	0	1	0	1	1	1	0	1	5
P62805	Q15942	0	0	0	0	0	0	1	0	1	1	1	0	1	5
P62805	Q15910	0	0	0	0	0	1	1	0	1	1	0	0	1	5
P62805	Q15637	0	0	0	0	0	0	1	0	1	1	1	0	1	5
P62805	Q15596	0	0	0	0	0	0	1	0	1	1	1	0	1	5
P62805	Q15573	0	0	0	0	0	0	1	0	1	1	1	0	1	5
P62805	Q15436	0	0	0	0	0	0	1	0	1	1	1	0	1	5
P62805	Q15047	0	0	0	0	0	0	1	0	1	1	1	0	1	5
P62805	Q15022	0	0	0	0	0	0	1	0	1	1	1	0	1	5
P62805	Q14999	0	0	0	0	0	0	1	0	1	1	1	0	1	5
P62805	Q14781	0	0	0	0	0	0	1	0	1	1	1	0	1	5
P62805	Q14739	0	0	0	0	0	0	1	0	1	1	1	0	1	5
P62805	Q14566	0	0	0	0	0	0	1	0	1	1	1	0	1	5
P62805	Q13627	0	0	0	0	0	0	1	0	1	1	1	0	1	5
P62805	Q13618	0	0	0	0	0	0	1	0	1	1	1	0	1	5
P62805	Q13617	0	0	0	0	0	0	1	0	1	1	1	0	1	5
P62805	Q13616	0	0	0	0	0	0	1	0	1	1	1	0	1	5
P62805	Q13547	0	0	0	0	0	0	1	0	1	1	1	0	1	5
P62805	Q13416	0	0	0	0	0	0	1	0	1	1	1	0	1	5
P62805	Q13185	0	0	0	0	0	0	1	0	1	1	1	0	1	5
P62805	Q13177	0	0	0	0	0	0	1	0	1	1	1	0	1	5
P62805	Q13153	0	0	0	0	0	0	1	0	1	1	1	0	1	5
P62805	Q13112	0	0	0	0	0	0	1	0	1	1	1	0	1	5
P62805	Q13111	0	0	0	0	0	0	1	0	1	1	1	0	1	5
P62805	Q12986	0	0	0	0	0	0	1	0	1	1	1	0	1	5
P62805	Q12888	0	0	0	0	0	0	1	0	1	1	1	0	1	5
P62805	Q12830	0	0	0	0	0	0	1	0	1	1	1	0	1	5
P62805	Q09472	0	0	0	0	0	0	1	0	1	1	1	0	1	5
P62805	Q09028	0	0	0	0	0	0	1	0	1	1	1	0	1	5
P62805	Q08945	0	0	0	0	0	0	1	0	1	1	1	0	1	5
P62805	Q06210	0	0	0	0	0	0	1	0	1	1	1	0	1	5
P62805	Q03468	0	0	0	0	0	0	1	0	1	1	1	0	1	5
P62805	Q03164	0	0	0	0	0	0	1	0	1	1	1	0	1	5
P62805	Q03111	0	0	0	0	0	0	1	0	1	1	1	0	1	5
P62805	Q01105	0	0	0	0	0	0	1	0	1	1	1	0	1	5
P62805	P84243	0	0	0	0	0	0	1	0	1	1	1	0	1	5
P62805	P83916	0	0	0	0	0	0	1	0	1	1	1	0	1	5
P62805	P83731	0	0	0	0	0	0	1	0	1	1	1	0	1	5
P62805	P63279	0	0	0	0	0	0	1	0	1	1	1	0	1	5
P62805	P63104	0	0	0	0	0	0	1	0	1	1	1	0	1	5
P62805	P62993	0	0	0	0	0	0	1	0	1	1	1	0	1	5
P62805	P62877	0	0	0	0	0	0	1	0	1	1	1	0	1	5
P62750	Q96HE9	0	0	0	1	0	0	1	0	1	1	0	1	0	5
P62699	P68431	1	1	0	0	0	0	0	1	1	0	0	1	0	5
P62633	Q9NZI8	1	0	0	1	0	0	0	0	1	1	0	1	0	5
P62633	P68431	1	1	0	0	0	0	0	1	1	0	0	1	0	5
P62318	P68431	1	1	0	0	0	0	0	1	1	0	0	1	0	5
P62316	P68431	1	1	0	0	0	0	0	1	1	0	0	1	0	5
P62277	Q96HE9	0	0	0	1	0	0	1	0	1	1	0	1	0	5
P62277	P78395	1	0	0	0	0	0	0	0	1	0	1	1	1	5
P62263	P68431	1	1	0	0	0	0	0	1	1	0	0	1	0	5
P62258	Q9BSJ6	1	0	0	1	0	0	1	0	1	1	0	0	0	5
P62258	P68431	1	1	0	0	0	0	0	1	1	0	0	1	0	5
P62258	P62805	0	0	0	0	0	0	1	0	1	1	1	0	1	5
P62081	P68431	1	1	0	0	0	0	0	1	1	0	0	1	0	5
P61981	P68431	1	1	0	0	0	0	0	1	1	0	0	1	0	5
P61978	P68431	1	1	0	0	0	0	0	1	1	0	0	1	0	5
P61964	P68431	1	1	0	0	0	0	0	1	1	0	0	1	0	5
P61964	P62805	0	0	0	0	0	0	1	0	1	1	1	0	1	5
P61956	Q96AY2	1	0	0	0	0	1	1	1	1	0	0	0	0	5
P61513	Q9NZI8	1	0	0	1	0	0	0	0	1	1	0	1	0	5
P61513	P68431	1	1	0	0	0	0	0	1	1	0	0	1	0	5
P61353	P68431	1	1	0	0	0	0	0	1	1	0	0	1	0	5
P61326	P62805	0	0	0	0	0	0	1	0	1	1	1	0	1	5
P61313	Q96HE9	0	0	0	1	0	0	1	0	1	1	0	1	0	5
P61254	P68431	1	1	0	0	0	0	0	1	1	0	0	1	0	5
P61247	Q96HE9	0	0	0	1	0	0	1	0	1	1	0	1	0	5
P61201	P78395	1	0	0	0	0	0	0	0	1	0	1	1	1	5
P61201	P68431	1	1	0	0	0	0	0	1	1	0	0	1	0	5
P61201	P62805	0	0	0	0	0	0	1	0	1	1	1	0	1	5
P61160	Q5M775	0	0	0	1	1	0	0	0	0	1	1	0	1	5
P61086	Q9BZY9	1	0	0	0	0	0	1	1	1	0	0	0	1	5
P61081	Q6PH85	0	0	0	0	1	1	1	0	0	0	1	1	0	5
P61077	Q9BZY9	1	0	0	0	0	0	1	1	1	0	0	0	1	5
P61019	Q9NZI8	1	0	0	1	0	0	0	0	1	1	0	1	0	5
P60866	P68431	1	1	0	0	0	0	0	1	1	0	0	1	0	5
P60484	Q13509	0	1	0	0	0	0	1	0	1	1	0	1	0	5
P60033	Q93079	1	1	0	1	0	0	0	0	0	1	0	0	1	5
P60033	Q13509	0	1	0	0	0	0	1	0	1	1	0	1	0	5
P60033	P68431	1	1	0	0	0	0	0	1	1	0	0	1	0	5
P56945	Q14209	0	0	0	0	1	1	1	1	0	0	1	0	0	5
P56178	Q99958	0	1	0	0	0	1	1	1	0	1	0	0	0	5
P56177	Q13485	0	0	0	1	1	1	0	0	0	1	1	0	0	5
P55318	Q9NRZ9	1	1	0	0	0	0	0	1	0	0	0	1	1	5
[truncated: 11,096 more rows]

## Sheet: Prominent proteins within gains
Supplementary Table VIIb: Proteins frequently involved in the edgetic gain perturbations across the 9 cancer types indicated in File 4a
Cancer types	Prominent proteins in edgetic perturbations
	edgetic Gain Perturbations
LUAD, HNSC, BRCA, BLCA, KIRP, STES, HNSC, THCA, LIHC	NUF2 (30)
BLC, BRCA, KIRC, KIRP, LIHC, LUAD, LUSC, STES, THCA	CDC45 (23)
LUAD, BRCA, BLCA, STES, LUSC, KICH, KIRC, KIRP, LIHC	NEIL3 (16)
LUAD, BRCA, BLCA, STES, LUSC, KIRP, PRAD, COAD, HNSC	ZIC2 (6)
BRCA, KICH*, KIRC, LUAD, LUSC, KIRP, PRAD, THCA, LIHC, BLCA*,	TICRR (3)
BLCA, BRCA*, KICH, KIRC, LUAD*, LUSC*, KIRP, PRAD*, THCA, STES*, LIHC*	CENPA (3)
* Indicates cancer types having additional differential perturbations involving the protein on the right. The numbers in the brackets indiate the number of edges perturbed at that protein.

## Sheet: pan-cancer losses
Supplementary Table VIIc: Edgetic loss perturbations occuring in multiple cancer types
Protein1	Protein2	BLCA	BRCA	COAD	HNSC	KICH	KIRC	KIRP	LIHC	LUAD	LUSC	PRAD	STES	THCA	MultiCanLost edges
Q9UQM7	Q9Y3A4	10	0	10	0	10	10	10	0	10	10	10	10	0	9
Q9UQM7	Q9Y2X7	10	0	10	0	10	10	10	0	10	10	10	10	0	9
Q9UQL6	Q9UQM7	10	0	10	0	10	10	10	0	10	10	10	10	0	9
Q9ULX7	Q9Y263	10	0	10	10	10	10	10	10	0	10	0	10	0	9
Q9ULX7	Q9UPT5	10	0	10	10	10	10	10	10	0	10	0	10	0	9
Q9UHK0	Q9UQM7	10	0	10	0	10	10	10	0	10	10	10	10	0	9
Q9UHK0	Q9UM19	0	0	10	0	10	10	10	10	10	10	10	10	0	9
Q9P2G3	Q9UF56	10	10	10	10	10	10	0	10	0	10	10	0	0	9
Q9NZZ3	Q9UQM7	10	0	10	0	10	10	10	0	10	10	10	10	0	9
Q9NZI2	Q9UK17	0	10	10	10	10	0	10	10	10	10	0	0	10	9
Q9NZ56	Q9Y664	0	10	10	10	0	10	10	10	10	10	0	10	0	9
Q9NVT9	Q9UQM7	10	0	10	0	10	10	10	0	10	10	10	10	0	9
Q9NVR5	Q9UQM7	10	0	10	0	10	10	10	0	10	10	10	10	0	9
Q9NVR5	Q9UM19	0	0	10	0	10	10	10	10	10	10	10	10	0	9
Q9NV70	Q9ULX7	10	0	10	10	10	10	10	10	0	10	0	10	0	9
Q9NR50	Q9ULX7	10	0	10	10	10	10	10	10	0	10	0	10	0	9
Q9H892	Q9UM19	0	0	10	0	10	10	10	10	10	10	10	10	0	9
Q9H583	Q9ULX7	10	0	10	10	10	10	10	10	0	10	0	10	0	9
Q9H0E7	Q9NP81	0	10	10	10	10	10	10	10	0	0	10	10	0	9
Q9BXW9	Q9ULX7	10	0	10	10	10	10	10	10	0	10	0	10	0	9
Q9BXS5	Q9ULX7	10	0	10	10	10	10	10	10	0	10	0	10	0	9
Q9BW27	Q9ULX7	10	0	10	10	10	10	10	10	0	10	0	10	0	9
Q9BRX9	Q9H426	0	0	10	10	10	10	10	10	10	10	0	10	0	9
Q99972	Q9NRN5	10	10	10	10	10	0	10	10	10	10	0	0	0	9
Q99576	Q9UM19	0	0	10	0	10	10	10	10	10	10	10	10	0	9
Q96SB4	Q9H426	0	0	10	10	10	10	10	10	10	10	0	10	0	9
Q96QU8	Q9ULX7	10	0	10	10	10	10	10	10	0	10	0	10	0	9
Q96PU5	Q9H3H9	0	10	10	10	10	10	10	10	10	10	0	0	0	9
Q96PM5	Q9UQM7	10	0	10	0	10	10	10	0	10	10	10	10	0	9
Q96MW5	Q9ULX7	10	0	10	10	10	10	10	10	0	10	0	10	0	9
Q96M98	Q9UNE7	10	10	10	10	0	10	0	10	10	10	0	10	0	9
Q96M98	Q99832	10	10	10	10	0	10	0	10	10	10	0	10	0	9
Q96IZ0	Q9GZV3	10	0	10	10	0	10	10	10	10	10	0	10	0	9
Q96IK1	Q9NZ56	0	10	10	10	0	10	10	10	10	10	0	10	0	9
Q96ER3	Q9ULX7	10	0	10	10	10	10	10	10	0	10	0	10	0	9
Q96EF0	Q96QG7	10	10	0	10	10	10	0	0	10	10	10	10	0	9
Q96C86	Q9ULX7	10	0	10	10	10	10	10	10	0	10	0	10	0	9
Q96BI1	Q9ULX7	10	0	10	10	10	10	10	10	0	10	0	10	0	9
Q92870	Q9NZ56	0	10	10	10	0	10	10	10	10	10	0	10	0	9
Q92796	Q9UQM7	10	0	10	0	10	10	10	0	10	10	10	10	0	9
Q92685	Q9P2G3	10	10	10	10	10	10	0	10	0	10	10	0	0	9
Q8WY21	Q99523	10	10	10	10	10	0	0	10	0	10	0	10	10	9
Q8WWA0	Q9UKB3	0	0	0	10	10	10	10	10	10	10	10	0	10	9
Q8WWA0	Q96RE7	0	0	0	10	10	10	10	10	10	10	10	0	10	9
Q8TDI0	Q9UBB5	10	0	10	0	10	10	10	10	0	10	10	10	0	9
Q8TDI0	Q9P2Y4	10	0	10	0	10	10	10	10	0	10	10	10	0	9
Q8TDI0	Q9BTC8	10	0	10	0	10	10	10	10	0	10	10	10	0	9
Q8TDI0	Q8WXI9	10	0	10	0	10	10	10	10	0	10	10	10	0	9
Q8TBB1	Q9UQB3	0	10	10	10	10	10	10	10	0	0	0	10	10	9
Q8TB24	Q9Y6A2	10	10	10	10	0	0	0	0	10	10	10	10	10	9
Q8TAG9	Q9ULX7	10	0	10	10	10	10	10	10	0	10	0	10	0	9
Q8NFF5	Q9P2G3	10	10	10	10	10	10	0	10	0	10	10	0	0	9
Q8N8Y5	Q9NZR2	0	10	10	10	10	10	10	0	0	0	10	10	10	9
Q8N6Y1	Q9NY97	10	10	0	10	10	10	10	10	0	10	0	10	0	9
Q8N6Y1	Q9NU53	10	10	0	10	10	10	10	10	0	10	0	10	0	9
Q8N653	Q8N9V6	10	10	10	10	10	0	0	0	10	10	10	10	0	9
Q8N4N3	Q96M98	10	10	10	10	0	10	0	10	10	10	0	10	0	9
Q8N3Z0	Q96DP5	10	10	10	10	0	0	10	0	10	10	10	0	10	9
Q8N336	Q9Y446	0	0	10	10	10	10	10	0	10	10	10	0	10	9
Q8N336	Q9NWX6	0	0	10	10	10	10	10	0	10	10	10	0	10	9
Q8N2Q7	Q9ULB1	0	0	10	10	10	10	10	10	10	0	0	10	10	9
Q8IYI6	Q9ULX7	10	0	10	10	10	10	10	10	0	10	0	10	0	9
Q8IXB3	Q9NWS8	10	10	10	10	0	10	10	10	0	0	0	10	10	9
Q8IXB3	Q92973	10	10	10	10	0	10	10	10	0	0	0	10	10	9
Q8IXB3	Q8WY22	10	10	10	10	0	10	10	10	0	0	0	10	10	9
Q8IXB3	Q8IYI6	10	10	10	10	0	10	10	10	0	0	0	10	10	9
Q8IVD9	Q9P2G3	10	10	10	10	10	10	0	10	0	10	10	0	0	9
Q8IUX8	Q99962	10	0	10	0	10	0	10	10	10	10	10	10	0	9
Q86YP4	Q8TDI0	10	0	10	0	10	10	10	10	0	10	10	10	0	9
Q86UW9	Q9UM19	0	0	10	0	10	10	10	10	10	10	10	10	0	9
Q7Z3U7	Q9ULX7	10	0	10	10	10	10	10	10	0	10	0	10	0	9
Q7Z2K6	Q9ULX7	10	0	10	10	10	10	10	10	0	10	0	10	0	9
Q7L5Y9	Q99972	10	10	10	10	10	0	10	10	10	10	0	0	0	9
Q7L1Q6	Q8IXB3	10	10	10	10	0	10	10	10	0	0	0	10	10	9
Q7KYR7	Q9NZ56	0	10	10	10	0	10	10	10	10	10	0	10	0	9
Q71U36	Q96M98	10	10	10	10	0	10	0	10	10	10	0	10	0	9
Q6ZMJ2	Q86VP6	10	10	10	0	10	10	10	10	10	10	0	0	0	9
Q6YHU6	Q9ULX7	10	0	10	10	10	10	10	10	0	10	0	10	0	9
Q6UWR7	Q92990	10	10	10	10	10	10	0	0	10	0	0	10	10	9
Q6PIL6	Q9NZI2	0	10	10	10	10	0	10	10	10	10	0	0	10	9
Q6IBW4	Q9ULX7	10	0	10	10	10	10	10	10	0	10	0	10	0	9
Q6FHJ7	Q9NZR2	0	10	10	10	10	10	10	0	0	0	10	10	10	9
Q5SVZ6	Q9UQM7	10	0	10	0	10	10	10	0	10	10	10	10	0	9
Q53HL2	Q9UQM7	10	0	10	0	10	10	10	0	10	10	10	10	0	9
Q53HC5	Q9P2G3	10	10	10	10	10	10	0	10	0	10	10	0	0	9
Q4G0X4	Q9P2G3	10	10	10	10	10	10	0	10	0	10	10	0	0	9
Q2M3C7	Q9Y3B1	0	10	10	0	10	10	0	10	10	10	0	10	10	9
Q2M3C7	Q8TBB1	0	10	10	0	10	10	0	10	10	10	0	10	10	9
Q2M3C7	Q8NI37	0	10	10	0	10	10	0	10	10	10	0	10	10	9
Q1MX18	Q8TBB1	10	0	10	0	10	10	10	0	10	10	10	10	0	9
Q16854	Q9UQM7	10	0	10	0	10	10	10	0	10	10	10	10	0	9
Q16854	Q9UM19	0	0	10	0	10	10	10	10	10	10	10	10	0	9
Q16775	Q99972	10	10	10	10	10	0	10	10	10	10	0	0	0	9
Q16635	Q9NZR2	0	10	10	10	10	10	10	0	0	0	10	10	10	9
Q16576	Q8TDI0	10	0	10	0	10	10	10	10	0	10	10	10	0	9
Q15796	Q9UQM7	10	0	10	0	10	10	10	0	10	10	10	10	0	9
Q15717	Q495C1	10	10	10	10	10	0	10	10	0	10	0	10	0	9
Q15700	Q8N2Q7	10	10	10	10	10	10	0	0	10	10	0	10	0	9
Q15554	Q5QGS0	10	0	10	10	0	10	10	10	10	0	0	10	10	9
Q15078	Q9UQM7	10	0	10	0	10	10	10	0	10	10	10	10	0	9
Q15051	Q9ULX7	10	0	10	10	10	10	10	10	0	10	0	10	0	9
Q14839	Q8TDI0	10	0	10	0	10	10	10	10	0	10	10	10	0	9
Q14746	Q9ULX7	10	0	10	10	10	10	10	10	0	10	0	10	0	9
Q14721	Q96PU5	10	10	10	10	10	0	10	0	10	10	0	10	0	9
Q14318	Q9UQM7	10	0	10	0	10	10	10	0	10	10	10	10	0	9
Q14249	Q8WWA0	0	0	0	10	10	10	10	10	10	10	10	0	10	9
Q14232	Q9ULX7	10	0	10	10	10	10	10	10	0	10	0	10	0	9
Q14114	Q9NY46	10	10	10	10	0	10	10	0	10	10	10	0	0	9
Q13683	Q99972	10	10	10	10	10	0	10	10	10	10	0	0	0	9
Q13620	Q9NZR2	0	10	10	10	10	10	10	0	0	0	10	10	10	9
Q13617	Q5M9Q1	10	10	10	10	10	0	10	0	10	10	0	10	0	9
Q13557	Q9UQM7	10	0	10	0	10	10	10	0	10	10	10	10	0	9
Q13555	Q9UQM7	10	0	10	0	10	10	10	0	10	10	10	10	0	9
Q13547	Q8TDI0	10	0	10	0	10	10	10	10	0	10	10	10	0	9
Q13535	Q9ULX7	10	0	10	10	10	10	10	10	0	10	0	10	0	9
Q13522	Q96LA8	10	10	10	10	10	10	0	0	10	0	0	10	10	9
Q13522	Q96IQ9	10	10	10	10	10	10	0	0	10	0	0	10	10	9
Q13522	Q8N9B5	10	10	10	10	10	10	0	0	10	0	0	10	10	9
Q13522	Q7L523	10	10	10	10	10	10	0	0	10	0	0	10	10	9
Q13501	Q9UQM7	10	0	10	0	10	10	10	0	10	10	10	10	0	9
Q13492	Q8WWA0	0	0	0	10	10	10	10	10	10	10	10	0	10	9
Q13330	Q8TDI0	10	0	10	0	10	10	10	10	0	10	10	10	0	9
Q13326	Q14315	10	10	10	10	0	10	0	0	10	10	10	10	0	9
Q13228	Q8N336	0	0	10	10	10	10	10	0	10	10	10	0	10	9
Q13137	Q9BV47	10	0	10	10	0	10	10	0	10	10	0	10	10	9
Q13011	Q8N3Z0	10	10	10	10	0	0	10	0	10	10	10	0	10	9
Q12959	Q9UQM7	10	0	10	0	10	10	10	0	10	10	10	10	0	9
Q12860	Q9UHK0	10	10	10	10	10	0	10	0	10	10	10	0	0	9
Q12860	Q9NVT9	10	10	10	10	10	0	10	0	10	10	10	0	0	9
Q12860	Q9NVR5	10	10	10	10	10	0	10	0	10	10	10	0	0	9
Q12860	Q16854	10	10	10	10	10	0	10	0	10	10	10	0	0	9
Q12860	Q16659	10	10	10	10	10	0	10	0	10	10	10	0	0	9
Q12769	Q9ULX7	10	0	10	10	10	10	10	10	0	10	0	10	0	9
Q09470	Q9NQC3	10	10	10	10	10	0	0	10	10	10	0	10	0	9
Q09028	Q8TDI0	10	0	10	0	10	10	10	10	0	10	10	10	0	9
Q07954	Q9NY46	10	10	10	10	0	10	10	0	10	10	10	0	0	9
Q07699	Q12860	10	10	10	10	10	0	10	0	10	10	10	0	0	9
Q07021	Q8N3Z0	10	10	10	10	0	0	10	0	10	10	10	0	10	9
Q05086	Q9UM19	0	0	10	0	10	10	10	10	10	10	10	10	0	9
Q04721	Q99972	10	10	10	10	10	0	10	10	10	10	0	0	0	9
Q04671	Q9NQ11	0	10	0	10	10	10	10	0	10	10	10	0	10	9
Q02978	Q13522	10	10	10	10	10	10	0	0	10	0	0	10	10	9
Q02447	Q8WWA0	0	0	0	10	10	10	10	10	10	10	10	0	10	9
Q02297	Q15303	0	0	10	0	10	10	10	10	10	10	10	10	0	9
Q01844	Q9NZR2	0	10	10	10	10	10	10	0	0	0	10	10	10	9
Q01518	Q99972	10	10	10	10	10	0	10	10	10	10	0	0	0	9
P83436	Q9ULX7	10	0	10	10	10	10	10	10	0	10	0	10	0	9
P78509	P98155	10	0	10	10	10	10	10	0	0	0	10	10	10	9
P78371	Q96M98	10	10	10	10	0	10	0	10	10	10	0	10	0	9
P78357	Q09470	10	10	10	10	10	0	0	10	10	10	0	10	0	9
P78352	Q09470	10	10	10	10	10	0	0	10	10	10	0	10	0	9
P68104	Q99972	10	10	10	10	10	0	10	10	10	10	0	0	0	9
P68032	Q59H18	10	10	10	10	10	0	10	10	0	10	0	10	0	9
P63261	Q99972	10	10	10	10	10	0	10	10	10	10	0	0	0	9
P62736	Q99972	10	10	10	10	10	0	10	10	10	10	0	0	0	9
P62736	Q13522	10	10	10	10	10	10	0	0	10	0	0	10	10	9
P62508	Q92786	10	0	10	0	10	10	10	10	10	0	10	0	10	9
P62195	Q9UQM7	10	0	10	0	10	10	10	0	10	10	10	10	0	9
P62158	Q9UQM7	10	0	10	0	10	10	10	0	10	10	10	10	0	9
P62136	Q12860	10	10	10	10	10	0	10	0	10	10	10	0	0	9
P61978	Q9UQM7	10	0	10	0	10	10	10	0	10	10	10	10	0	9
P60709	Q99972	10	10	10	10	10	0	10	10	10	10	0	0	0	9
P60484	P61647	0	10	10	10	10	10	10	10	10	10	0	0	0	9
P60201	Q9UBY8	10	10	10	10	0	10	0	10	10	10	0	10	0	9
P60033	Q99972	10	10	10	10	10	0	10	10	10	10	0	0	0	9
P58400	Q9Y6X6	0	10	10	0	10	10	10	10	10	0	0	10	10	9
P58400	Q9NZ94	0	0	10	10	10	10	10	10	10	0	0	10	10	9
P56693	Q99814	10	10	10	10	10	10	10	10	0	0	0	0	10	9
P56693	Q969H0	10	10	10	10	10	10	10	10	0	0	0	0	10	9
P56693	Q13287	10	10	10	10	10	10	10	10	0	0	0	0	10	9
P56693	Q00534	10	10	10	10	10	10	10	10	0	0	0	0	10	9
P56182	Q9ULX7	10	0	10	10	10	10	10	10	0	10	0	10	0	9
P55809	Q8N3Z0	10	10	10	10	0	0	10	0	10	10	10	0	10	9
P55072	Q96M98	10	10	10	10	0	10	0	10	10	10	0	10	0	9
P55010	Q8TDI0	10	0	10	0	10	10	10	10	0	10	10	10	0	9
P54829	Q9UEU0	10	10	10	10	0	0	10	10	10	10	0	10	0	9
P54829	Q9NW97	10	10	10	10	0	0	10	10	10	10	0	10	0	9
P54829	Q93034	10	10	10	10	0	0	10	10	10	10	0	10	0	9
P54829	Q07325	10	10	10	10	0	0	10	10	10	10	0	10	0	9
P54725	Q9UQM7	10	0	10	0	10	10	10	0	10	10	10	10	0	9
P54274	Q5QGS0	10	0	10	10	0	10	10	10	10	0	0	10	10	9
P54274	P54829	10	10	10	10	0	0	10	10	10	10	0	10	0	9
P53999	Q8TDI0	10	0	10	0	10	10	10	10	0	10	10	10	0	9
P51449	Q92753	0	0	10	10	10	10	10	10	10	10	0	0	10	9
P50991	Q96M98	10	10	10	10	0	10	0	10	10	10	0	10	0	9
P50748	Q9ULX7	10	0	10	10	10	10	10	10	0	10	0	10	0	9
P50222	Q9HC56	10	10	10	10	10	0	10	0	10	10	0	10	0	9
P50222	Q8TF39	10	10	10	10	10	0	10	0	10	10	0	10	0	9
P49841	Q8WWA0	0	0	0	10	10	10	10	10	10	10	10	0	10	9
P49841	P56693	10	10	10	10	10	10	10	10	0	0	0	0	10	9
P49770	Q9ULX7	10	0	10	10	10	10	10	10	0	10	0	10	0	9
P49759	Q9Y6A2	10	10	10	10	0	0	0	0	10	10	10	10	10	9
P49593	Q9UQM7	10	0	10	0	10	10	10	0	10	10	10	10	0	9
P49407	Q9NZR2	0	10	10	10	10	10	10	0	0	0	10	10	10	9
P49368	Q96M98	10	10	10	10	0	10	0	10	10	10	0	10	0	9
P48643	Q96M98	10	10	10	10	0	10	0	10	10	10	0	10	0	9
P48546	Q8TBB1	10	10	10	10	10	10	0	0	0	10	10	10	0	9
P48443	Q13133	10	10	10	10	0	0	0	0	10	10	10	10	10	9
P47870	Q9UMX0	0	0	10	10	10	10	10	10	0	10	10	10	0	9
P46934	Q9GZV3	10	0	10	10	0	10	10	10	10	10	0	10	0	9
P43121	Q12860	10	10	10	10	10	0	10	0	10	10	10	0	0	9
P42892	Q99972	10	10	10	10	10	0	10	10	10	10	0	0	0	9
P42356	Q9ULX7	10	0	10	10	10	10	10	10	0	10	0	10	0	9
P42345	Q9ULX7	10	0	10	10	10	10	10	10	0	10	0	10	0	9
P40855	Q9ULX7	10	0	10	10	10	10	10	10	0	10	0	10	0	9
P40227	Q96M98	10	10	10	10	0	10	0	10	10	10	0	10	0	9
P38398	Q5M9Q1	10	10	10	10	10	0	10	0	10	10	0	10	0	9
P37173	Q9NZ56	0	10	10	10	0	10	10	10	10	10	0	10	0	9
P36955	Q99972	10	10	10	10	10	0	10	10	10	10	0	0	0	9
P36897	Q99972	10	10	10	10	10	0	10	10	10	10	0	0	0	9
P35749	Q99972	10	10	10	10	10	0	10	10	10	10	0	0	0	9
P35555	Q99972	10	10	10	10	10	0	10	10	10	10	0	0	0	9
P35251	Q99972	10	10	10	10	10	0	10	10	10	10	0	0	0	9
P34932	Q99972	10	10	10	10	10	0	10	10	10	10	0	0	0	9
P34932	Q96M98	10	10	10	10	0	10	0	10	10	10	0	10	0	9
P31948	Q96M98	10	10	10	10	0	10	0	10	10	10	0	10	0	9
P31946	Q9UQM7	10	0	10	0	10	10	10	0	10	10	10	10	0	9
P31749	Q9UQM7	10	0	10	0	10	10	10	0	10	10	10	10	0	9
P31749	P60201	10	10	10	10	0	10	0	10	10	10	0	10	0	9
P31689	Q96M98	10	10	10	10	0	10	0	10	10	10	0	10	0	9
P31645	Q16623	0	0	0	10	0	10	10	10	10	10	10	10	10	9
P31645	P37840	0	0	0	10	0	10	10	10	10	10	10	10	10	9
P31152	Q9NZ01	10	10	10	10	0	0	10	10	10	10	0	10	0	9
P31152	Q96NB2	10	10	10	10	0	0	10	10	10	10	0	10	0	9
P31152	Q8IW41	10	10	10	10	0	0	10	10	10	10	0	10	0	9
P31152	Q8IUD2	10	10	10	10	0	0	10	10	10	10	0	10	0	9
P31152	Q7L8L6	10	10	10	10	0	0	10	10	10	10	0	10	0	9
P31152	Q01813	10	10	10	10	0	0	10	10	10	10	0	10	0	9
P31152	P46108	10	10	10	10	0	0	10	10	10	10	0	10	0	9
P30518	Q9UNE7	10	10	10	10	0	10	10	0	10	10	0	10	0	9
P30518	Q9BXJ1	10	10	10	10	0	10	10	0	10	10	0	10	0	9
P30518	Q9BUN8	10	10	10	10	0	10	10	0	10	10	0	10	0	9
P30518	Q8NCT1	10	10	10	10	0	10	10	0	10	10	0	10	0	9
P30518	Q00610	10	10	10	10	0	10	10	0	10	10	0	10	0	9
P30518	P63092	10	10	10	10	0	10	10	0	10	10	0	10	0	9
P30518	P62873	10	10	10	10	0	10	10	0	10	10	0	10	0	9
P30518	P59768	10	10	10	10	0	10	10	0	10	10	0	10	0	9
P30518	P55072	10	10	10	10	0	10	10	0	10	10	0	10	0	9
P30518	P34947	10	10	10	10	0	10	10	0	10	10	0	10	0	9
P30518	P32121	10	10	10	10	0	10	10	0	10	10	0	10	0	9
P29474	Q9UQM7	10	0	10	0	10	10	10	0	10	10	10	10	0	9
P29466	Q9NZ56	0	10	10	10	0	10	10	10	10	10	0	10	0	9
P29401	Q99972	10	10	10	10	10	0	10	10	10	10	0	0	0	9
P28482	P54829	10	10	10	10	0	0	10	10	10	10	0	10	0	9
P27824	P31645	0	0	0	10	0	10	10	10	10	10	10	10	10	9
P27797	P60201	10	10	10	10	0	10	0	10	10	10	0	10	0	9
P27797	P31645	0	0	0	10	0	10	10	10	10	10	10	10	10	9
P27361	P54829	10	10	10	10	0	0	10	10	10	10	0	10	0	9
P27361	P30518	10	10	10	10	0	10	10	0	10	10	0	10	0	9
P27348	Q9UQM7	10	0	10	0	10	10	10	0	10	10	10	10	0	9
P25788	Q96MZ4	10	10	10	10	10	0	0	10	10	10	0	10	0	9
P24387	Q9UJM3	10	10	10	10	10	0	10	0	10	10	0	10	0	9
P24387	Q9H4B7	10	10	10	10	10	0	10	0	10	10	10	0	0	9
P24387	Q96BR5	10	10	10	10	10	0	10	0	10	10	0	10	0	9
P24387	Q6NSJ2	10	10	10	10	10	0	10	0	10	10	0	10	0	9
P24387	Q15025	10	10	10	10	10	0	10	0	10	10	0	10	0	9
P24387	Q13501	10	10	10	10	10	0	10	0	10	10	0	10	0	9
P24387	P47813	10	10	10	10	10	0	10	0	10	10	0	10	0	9
P24385	Q8WWA0	0	0	0	10	10	10	10	10	10	10	10	0	10	9
P23471	Q12860	10	10	10	10	10	10	0	0	10	10	10	0	0	9
P22001	Q09470	10	10	10	10	10	0	0	10	10	10	0	10	0	9
P21359	Q9ULX7	10	0	10	10	10	10	10	10	0	10	0	10	0	9
P20783	Q06033	10	10	10	10	0	0	10	10	10	10	0	10	0	9
P20366	P46379	10	10	10	10	10	10	0	10	0	0	0	10	10	9
P20366	P25103	10	10	10	10	10	10	0	10	0	0	0	10	10	9
P19438	Q99972	10	10	10	10	10	0	10	10	10	10	0	0	0	9
P19174	Q9UQM7	10	0	10	0	10	10	10	0	10	10	10	10	0	9
P18846	Q9UQM7	10	0	10	0	10	10	10	0	10	10	10	10	0	9
P18084	P60201	10	10	10	10	0	10	0	10	10	10	0	10	0	9
P17987	Q96M98	10	10	10	10	0	10	0	10	10	10	0	10	0	9
P17931	Q99972	10	10	10	10	10	0	10	10	10	10	0	0	0	9
P17931	Q8N336	0	0	10	10	10	10	10	0	10	10	10	0	10	9
P16520	P49758	10	10	10	10	10	0	10	10	0	0	10	10	0	9
P16220	Q9UQM7	10	0	10	0	10	10	10	0	10	10	10	10	0	9
P14618	Q99972	10	10	10	10	10	0	10	10	10	10	0	0	0	9
P13385	Q9Y285	0	10	0	10	10	0	10	10	10	10	10	0	10	9
P13385	Q9UL63	0	10	0	10	10	0	10	10	10	10	10	0	10	9
P13385	Q9UHQ7	0	10	0	10	10	0	10	10	10	10	10	0	10	9
P13385	Q9NWU2	0	10	0	10	10	0	10	10	10	10	10	0	10	9
P13385	Q9H871	0	10	0	10	10	0	10	10	10	10	10	0	10	9
P13385	Q9H7D7	0	10	0	10	10	0	10	10	10	10	10	0	10	9
P13385	Q96S59	0	10	0	10	10	0	10	10	10	10	10	0	10	9
P13385	Q96E35	0	10	0	10	10	0	10	10	10	10	10	0	10	9
P13385	Q8IVV7	0	10	0	10	10	0	10	10	10	10	10	0	10	9
P13385	Q8IUR7	0	10	0	10	10	0	10	10	10	10	10	0	10	9
P13385	Q7L5Y9	0	10	0	10	10	0	10	10	10	10	10	0	10	9
P13385	Q7L5N1	0	10	0	10	10	0	10	10	10	10	10	0	10	9
P13385	Q6VN20	0	10	0	10	10	0	10	10	10	10	10	0	10	9
P13385	Q5T3J3	0	10	0	10	10	0	10	10	10	10	10	0	10	9
P13385	P62699	0	10	0	10	10	0	10	10	10	10	10	0	10	9
P13385	P53680	0	10	0	10	10	0	10	10	10	10	10	0	10	9
P13385	P46379	0	10	0	10	10	0	10	10	10	10	10	0	10	9
P13385	P36896	0	10	0	10	10	0	10	10	10	10	10	0	10	9
P13385	P23142	0	10	0	10	10	0	10	10	10	10	10	0	10	9
P12956	P20366	10	10	10	10	10	10	0	10	0	0	0	10	10	9
P12814	Q9UQM7	10	0	10	0	10	10	10	0	10	10	10	10	0	9
P11362	P31371	10	10	10	10	0	0	10	10	0	10	10	10	0	9
P11021	Q8WWA0	0	0	0	10	10	10	10	10	10	10	10	0	10	9
P10636	Q9UQM7	10	0	10	0	10	10	10	0	10	10	10	10	0	9
P10451	Q9NZI2	0	10	10	10	10	0	10	10	10	10	0	0	10	9
P10451	Q9H426	0	0	10	10	10	10	10	10	10	10	0	10	0	9
P10415	Q8WWA0	0	0	0	10	10	10	10	10	10	10	10	0	10	9
P10301	Q8WWA0	0	0	0	10	10	10	10	10	10	10	10	0	10	9
P0CG48	P54829	10	10	10	10	0	0	10	10	10	10	0	10	0	9
P09972	P17540	10	10	10	0	0	0	10	10	10	10	0	10	10	9
P09493	Q99972	10	10	10	10	10	0	10	10	10	10	0	0	0	9
P09471	Q9UQM7	10	0	10	0	10	10	10	0	10	10	10	10	0	9
P08123	Q99972	10	10	10	10	10	0	10	10	10	10	0	0	0	9
P07948	Q6UW49	10	10	10	10	0	0	10	0	10	10	0	10	10	9
P07948	Q5M9Q1	10	10	10	10	10	0	10	0	10	10	0	10	0	9
P07900	Q9UQM7	10	0	10	0	10	10	10	0	10	10	10	10	0	9
P07900	Q9P2G3	10	10	10	10	10	10	0	10	0	10	10	0	0	9
P07900	Q96M98	10	10	10	10	0	10	0	10	10	10	0	10	0	9
P07900	P31152	10	10	10	10	0	0	10	10	10	10	0	10	0	9
P07437	Q96M98	10	10	10	10	0	10	0	10	10	10	0	10	0	9
P07355	Q99972	10	10	10	10	10	0	10	10	10	10	0	0	0	9
P07199	P20366	10	10	10	10	10	10	0	10	0	0	0	10	10	9
P06756	P60201	10	10	10	10	0	10	0	10	10	10	0	10	0	9
P06737	P20783	10	10	10	10	10	0	10	10	10	0	0	10	0	9
P06733	Q99972	10	10	10	10	10	0	10	10	10	10	0	0	0	9
P06241	P54829	10	10	10	10	0	0	10	10	10	10	0	10	0	9
P06241	P23946	10	10	10	10	0	10	0	0	10	10	10	10	0	9
P05231	Q99962	10	0	10	0	10	0	10	10	10	10	10	10	0	9
P05231	Q05516	10	10	10	10	10	10	10	0	0	10	10	0	0	9
P05067	Q9H426	0	0	10	10	10	10	10	10	10	10	0	10	0	9
P05067	Q96M98	10	10	10	10	0	10	0	10	10	10	0	10	0	9
P05067	Q13326	10	10	10	10	0	10	0	0	10	10	10	10	0	9
P05067	P60508	10	10	10	0	10	10	10	10	10	10	0	0	0	9
P05023	P31152	10	10	10	10	0	0	10	10	10	10	0	10	0	9
P04798	Q96DZ9	10	10	0	10	10	0	0	10	10	10	10	10	0	9
P04637	Q96M98	10	10	10	10	0	10	0	10	10	10	0	10	0	9
P04637	Q6UW49	10	10	10	10	0	0	10	0	10	10	0	10	10	9
P04629	Q9Y6Y8	0	10	10	10	10	10	10	10	10	10	0	0	0	9
P04629	Q9Y6X9	0	10	10	10	10	10	10	10	10	10	0	0	0	9
P04629	Q9Y6W5	0	10	10	10	10	10	10	10	10	10	0	0	0	9
P04629	Q9Y6W3	0	10	10	10	10	10	10	10	10	10	0	0	0	9
P04629	Q9Y6K5	0	10	10	10	10	10	10	10	10	10	0	0	0	9
P04629	Q9Y6J9	0	10	10	10	10	10	10	10	10	10	0	0	0	9
P04629	Q9Y6I3	0	10	10	10	10	10	10	10	10	10	0	0	0	9
P04629	Q9Y6G9	0	10	10	10	10	10	10	10	10	10	0	0	0	9
P04629	Q9Y6E2	0	10	10	10	10	10	10	10	10	10	0	0	0	9
P04629	Q9Y6D9	0	10	10	10	10	10	10	10	10	10	0	0	0	9
P04629	Q9Y6D6	0	10	10	10	10	10	10	10	10	10	0	0	0	9
P04629	Q9Y6C9	0	10	10	10	10	10	10	10	10	10	0	0	0	9
P04629	Q9Y6A5	0	10	10	10	10	10	10	10	10	10	0	0	0	9
P04629	Q9Y696	0	10	10	10	10	10	10	10	10	10	0	0	0	9
P04629	Q9Y679	0	10	10	10	10	10	10	10	10	10	0	0	0	9
P04629	Q9Y678	0	10	10	10	10	10	10	10	10	10	0	0	0	9
P04629	Q9Y617	0	10	10	10	10	10	10	10	10	10	0	0	0	9
P04629	Q9Y613	0	10	10	10	10	10	10	10	10	10	0	0	0	9
P04629	Q9Y5X1	0	10	10	10	10	10	10	10	10	10	0	0	0	9
P04629	Q9Y5V3	0	10	10	10	10	10	10	10	10	10	0	0	0	9
P04629	Q9Y5S2	0	10	10	10	10	10	10	10	10	10	0	0	0	9
P04629	Q9Y5Q9	0	10	10	10	10	10	10	10	10	10	0	0	0	9
P04629	Q9Y5Q8	0	10	10	10	10	10	10	10	10	10	0	0	0	9
P04629	Q9Y5M8	0	10	10	10	10	10	10	10	10	10	0	0	0	9
P04629	Q9Y5K5	0	10	10	10	10	10	10	10	10	10	0	0	0	9
P04629	Q9Y5E6	0	10	10	10	10	10	10	10	10	10	0	0	0	9
P04629	Q9Y5B9	0	10	10	10	10	10	10	10	10	10	0	0	0	9
P04629	Q9Y5A9	0	10	10	10	10	10	10	10	10	10	0	0	0	9
P04629	Q9Y570	0	10	10	10	10	10	10	10	10	10	0	0	0	9
P04629	Q9Y520	0	10	10	10	10	10	10	10	10	10	0	0	0	9
P04629	Q9Y4W6	0	10	10	10	10	10	10	10	10	10	0	0	0	9
P04629	Q9Y4W2	0	10	10	10	10	10	10	10	10	10	0	0	0	9
P04629	Q9Y4R8	0	10	10	10	10	10	10	10	10	10	0	0	0	9
P04629	Q9Y4P3	0	10	10	10	10	10	10	10	10	10	0	0	0	9
P04629	Q9Y4L1	0	10	10	10	10	10	10	10	10	10	0	0	0	9
P04629	Q9Y4K4	0	10	10	10	10	10	10	10	10	10	0	0	0	9
P04629	Q9Y4K3	0	10	10	10	10	10	10	10	10	10	0	0	0	9
P04629	Q9Y4I1	0	10	10	10	10	10	10	10	10	10	0	0	0	9
P04629	Q9Y4H2	0	10	10	10	10	10	10	10	10	10	0	0	0	9
P04629	Q9Y4E8	0	10	10	10	10	10	10	10	10	10	0	0	0	9
P04629	Q9Y4E6	0	10	10	10	10	10	10	10	10	10	0	0	0	9
P04629	Q9Y4C2	0	10	10	10	10	10	10	10	10	10	0	0	0	9
P04629	Q9Y4B6	0	10	10	10	10	10	10	10	10	10	0	0	0	9
P04629	Q9Y496	0	10	10	10	10	10	10	10	10	10	0	0	0	9
P04629	Q9Y490	0	10	10	10	10	10	10	10	10	10	0	0	0	9
P04629	Q9Y450	0	10	10	10	10	10	10	10	10	10	0	0	0	9
P04629	Q9Y3Z3	0	10	10	10	10	10	10	10	10	10	0	0	0	9
P04629	Q9Y3T9	0	10	10	10	10	10	10	10	10	10	0	0	0	9
P04629	Q9Y3P9	0	10	10	10	10	10	10	10	10	10	0	0	0	9
P04629	Q9Y3I0	0	10	10	10	10	10	10	10	10	10	0	0	0	9
P04629	Q9Y3F4	0	10	10	10	10	10	10	10	10	10	0	0	0	9
P04629	Q9Y399	0	10	10	10	10	10	10	10	10	10	0	0	0	9
P04629	Q9Y383	0	10	10	10	10	10	10	10	10	10	0	0	0	9
P04629	Q9Y2X7	0	10	10	10	10	10	10	10	10	10	0	0	0	9
P04629	Q9Y2X3	0	10	10	10	10	10	10	10	10	10	0	0	0	9
P04629	Q9Y2X0	0	10	10	10	10	10	10	10	10	10	0	0	0	9
P04629	Q9Y2W2	0	10	10	10	10	10	10	10	10	10	0	0	0	9
P04629	Q9Y2W1	0	10	10	10	10	10	10	10	10	10	0	0	0	9
P04629	Q9Y2U8	0	10	10	10	10	10	10	10	10	10	0	0	0	9
P04629	Q9Y2T2	0	10	10	10	10	10	10	10	10	10	0	0	0	9
P04629	Q9Y2R9	0	10	10	10	10	10	10	10	10	10	0	0	0	9
P04629	Q9Y2L9	0	10	10	10	10	10	10	10	10	10	0	0	0	9
P04629	Q9Y2L5	0	10	10	10	10	10	10	10	10	10	0	0	0	9
P04629	Q9Y2L1	0	10	10	10	10	10	10	10	10	10	0	0	0	9
P04629	Q9Y2I7	0	10	10	10	10	10	10	10	10	10	0	0	0	9
P04629	Q9Y2H5	0	10	10	10	10	10	10	10	10	10	0	0	0	9
P04629	Q9Y2D4	0	10	10	10	10	10	10	10	10	10	0	0	0	9
P04629	Q9Y2A7	0	10	10	10	10	10	10	10	10	10	0	0	0	9
P04629	Q9Y295	0	10	10	10	10	10	10	10	10	10	0	0	0	9
P04629	Q9Y285	0	10	10	10	10	10	10	10	10	10	0	0	0	9
P04629	Q9Y266	0	10	10	10	10	10	10	10	10	10	0	0	0	9
P04629	Q9Y265	0	10	10	10	10	10	10	10	10	10	0	0	0	9
P04629	Q9Y263	0	10	10	10	10	10	10	10	10	10	0	0	0	9
P04629	Q9Y262	0	10	10	10	10	10	10	10	10	10	0	0	0	9
P04629	Q9Y230	0	10	10	10	10	10	10	10	10	10	0	0	0	9
P04629	Q9Y224	0	10	10	10	10	10	10	10	10	10	0	0	0	9
P04629	Q9Y223	0	10	10	10	10	10	10	10	10	10	0	0	0	9
P04629	Q9UQE7	0	10	10	10	10	10	10	10	10	10	0	0	0	9
P04629	Q9UQC2	0	10	10	10	10	10	10	10	10	10	0	0	0	9
P04629	Q9UQ80	0	10	10	10	10	10	10	10	10	10	0	0	0	9
P04629	Q9UQ35	0	10	10	10	10	10	10	10	10	10	0	0	0	9
P04629	Q9UPY3	0	10	10	10	10	10	10	10	10	10	0	0	0	9
P04629	Q9UPT8	0	10	10	10	10	10	10	10	10	10	0	0	0	9
P04629	Q9UPT6	0	10	10	10	10	10	10	10	10	10	0	0	0	9
P04629	Q9UPT5	0	10	10	10	10	10	10	10	10	10	0	0	0	9
P04629	Q9UPN9	0	10	10	10	10	10	10	10	10	10	0	0	0	9
P04629	Q9UPN7	0	10	10	10	10	10	10	10	10	10	0	0	0	9
P04629	Q9UPN6	0	10	10	10	10	10	10	10	10	10	0	0	0	9
P04629	Q9UPN4	0	10	10	10	10	10	10	10	10	10	0	0	0	9
P04629	Q9UP83	0	10	10	10	10	10	10	10	10	10	0	0	0	9
P04629	Q9UNS2	0	10	10	10	10	10	10	10	10	10	0	0	0	9
P04629	Q9UNS1	0	10	10	10	10	10	10	10	10	10	0	0	0	9
P04629	Q9UNN5	0	10	10	10	10	10	10	10	10	10	0	0	0	9
P04629	Q9UNM6	0	10	10	10	10	10	10	10	10	10	0	0	0	9
P04629	Q9UNF1	0	10	10	10	10	10	10	10	10	10	0	0	0	9
P04629	Q9UN86	0	10	10	10	10	10	10	10	10	10	0	0	0	9
P04629	Q9UN70	0	10	10	10	10	10	10	10	10	10	0	0	0	9
P04629	Q9UMX0	0	10	10	10	10	10	10	10	10	10	0	0	0	9
P04629	Q9UMS6	0	10	10	10	10	10	10	10	10	10	0	0	0	9
P04629	Q9UMS4	0	10	10	10	10	10	10	10	10	10	0	0	0	9
P04629	Q9UM54	0	10	10	10	10	10	10	10	10	10	0	0	0	9
P04629	Q9UM47	0	10	10	10	10	10	10	10	10	10	0	0	0	9
P04629	Q9ULX6	0	10	10	10	10	10	10	10	10	10	0	0	0	9
P04629	Q9ULK5	0	10	10	10	10	10	10	10	10	10	0	0	0	9
P04629	Q9ULK4	0	10	10	10	10	10	10	10	10	10	0	0	0	9
P04629	Q9ULH1	0	10	10	10	10	10	10	10	10	10	0	0	0	9
P04629	Q9ULH0	0	10	10	10	10	10	10	10	10	10	0	0	0	9
P04629	Q9UL46	0	10	10	10	10	10	10	10	10	10	0	0	0	9
P04629	Q9UL03	0	10	10	10	10	10	10	10	10	10	0	0	0	9
P04629	Q9UKX7	0	10	10	10	10	10	10	10	10	10	0	0	0	9
P04629	Q9UKV8	0	10	10	10	10	10	10	10	10	10	0	0	0	9
P04629	Q9UKV5	0	10	10	10	10	10	10	10	10	10	0	0	0	9
P04629	Q9UKV3	0	10	10	10	10	10	10	10	10	10	0	0	0	9
P04629	Q9UKN8	0	10	10	10	10	10	10	10	10	10	0	0	0	9
P04629	Q9UKM9	0	10	10	10	10	10	10	10	10	10	0	0	0	9
P04629	Q9UKK9	0	10	10	10	10	10	10	10	10	10	0	0	0	9
P04629	Q9UKG1	0	10	10	10	10	10	10	10	10	10	0	0	0	9
P04629	Q9UKF6	0	10	10	10	10	10	10	10	10	10	0	0	0	9
P04629	Q9UK59	0	10	10	10	10	10	10	10	10	10	0	0	0	9
P04629	Q9UJZ1	0	10	10	10	10	10	10	10	10	10	0	0	0	9
P04629	Q9UJW0	0	10	10	10	10	10	10	10	10	10	0	0	0	9
P04629	Q9UJV9	0	10	10	10	10	10	10	10	10	10	0	0	0	9
P04629	Q9UJU6	0	10	10	10	10	10	10	10	10	10	0	0	0	9
P04629	Q9UJS0	0	10	10	10	10	10	10	10	10	10	0	0	0	9
P04629	Q9UJA5	0	10	10	10	10	10	10	10	10	10	0	0	0	9
P04629	Q9UII4	0	10	10	10	10	10	10	10	10	10	0	0	0	9
P04629	Q9UID3	0	10	10	10	10	10	10	10	10	10	0	0	0	9
P04629	Q9UI26	0	10	10	10	10	10	10	10	10	10	0	0	0	9
P04629	Q9UI10	0	10	10	10	10	10	10	10	10	10	0	0	0	9
P04629	Q9UHX1	0	10	10	10	10	10	10	10	10	10	0	0	0	9
P04629	Q9UHR5	0	10	10	10	10	10	10	10	10	10	0	0	0	9
P04629	Q9UHI6	0	10	10	10	10	10	10	10	10	10	0	0	0	9
P04629	Q9UHD9	0	10	10	10	10	10	10	10	10	10	0	0	0	9
P04629	Q9UHD8	0	10	10	10	10	10	10	10	10	10	0	0	0	9
P04629	Q9UHD2	0	10	10	10	10	10	10	10	10	10	0	0	0	9
P04629	Q9UHB9	0	10	10	10	10	10	10	10	10	10	0	0	0	9
P04629	Q9UHB6	0	10	10	10	10	10	10	10	10	10	0	0	0	9
P04629	Q9UH99	0	10	10	10	10	10	10	10	10	10	0	0	0	9
P04629	Q9UGP8	0	10	10	10	10	10	10	10	10	10	0	0	0	9
P04629	Q9UG63	0	10	10	10	10	10	10	10	10	10	0	0	0	9
P04629	Q9UEG4	0	10	10	10	10	10	10	10	10	10	0	0	0	9
P04629	Q9UBX3	0	10	10	10	10	10	10	10	10	10	0	0	0	9
P04629	Q9UBV2	0	10	10	10	10	10	10	10	10	10	0	0	0	9
P04629	Q9UBT2	0	10	10	10	10	10	10	10	10	10	0	0	0	9
P04629	Q9UBS4	0	10	10	10	10	10	10	10	10	10	0	0	0	9
P04629	Q9UBN7	0	10	10	10	10	10	10	10	10	10	0	0	0	9
P04629	Q9UBJ2	0	10	10	10	10	10	10	10	10	10	0	0	0	9
P04629	Q9UBH6	0	10	10	10	10	10	10	10	10	10	0	0	0	9
P04629	Q9UBE0	0	10	10	10	10	10	10	10	10	10	0	0	0	9
P04629	Q9UBD5	0	10	10	10	10	10	10	10	10	10	0	0	0	9
P04629	Q9UBC2	0	10	10	10	10	10	10	10	10	10	0	0	0	9
P04629	Q9UBB9	0	10	10	10	10	10	10	10	10	10	0	0	0	9
P04629	Q9P2R7	0	10	10	10	10	10	10	10	10	10	0	0	0	9
P04629	Q9P2R3	0	10	10	10	10	10	10	10	10	10	0	0	0	9
P04629	Q9P2N7	0	10	10	10	10	10	10	10	10	10	0	0	0	9
P04629	Q9P2L0	0	10	10	10	10	10	10	10	10	10	0	0	0	9
P04629	Q9P2K5	0	10	10	10	10	10	10	10	10	10	0	0	0	9
P04629	Q9P2J5	0	10	10	10	10	10	10	10	10	10	0	0	0	9
P04629	Q9P2I0	0	10	10	10	10	10	10	10	10	10	0	0	0	9
P04629	Q9P2E9	0	10	10	10	10	10	10	10	10	10	0	0	0	9
P04629	Q9P2D3	0	10	10	10	10	10	10	10	10	10	0	0	0	9
P04629	Q9P2B4	0	10	10	10	10	10	10	10	10	10	0	0	0	9
P04629	Q9P287	0	10	10	10	10	10	10	10	10	10	0	0	0	9
P04629	Q9P265	0	10	10	10	10	10	10	10	10	10	0	0	0	9
P04629	Q9P258	0	10	10	10	10	10	10	10	10	10	0	0	0	9
P04629	Q9P253	0	10	10	10	10	10	10	10	10	10	0	0	0	9
P04629	Q9P0L0	0	10	10	10	10	10	10	10	10	10	0	0	0	9
P04629	Q9P035	0	10	10	10	10	10	10	10	10	10	0	0	0	9
P04629	Q9P016	0	10	10	10	10	10	10	10	10	10	0	0	0	9
P04629	Q9P015	0	10	10	10	10	10	10	10	10	10	0	0	0	9
P04629	Q9NZW5	0	10	10	10	10	10	10	10	10	10	0	0	0	9
P04629	Q9NZT2	0	10	10	10	10	10	10	10	10	10	0	0	0	9
P04629	Q9NZN5	0	10	10	10	10	10	10	10	10	10	0	0	0	9
P04629	Q9NZL4	0	10	10	10	10	10	10	10	10	10	0	0	0	9
P04629	Q9NZC9	0	10	10	10	10	10	10	10	10	10	0	0	0	9
P04629	Q9NZB2	0	10	10	10	10	10	10	10	10	10	0	0	0	9
P04629	Q9NZ01	0	10	10	10	10	10	10	10	10	10	0	0	0	9
P04629	Q9NYU2	0	10	10	10	10	10	10	10	10	10	0	0	0	9
P04629	Q9NYK5	0	10	10	10	10	10	10	10	10	10	0	0	0	9
P04629	Q9NYF8	0	10	10	10	10	10	10	10	10	10	0	0	0	9
P04629	Q9NYB9	0	10	10	10	10	10	10	10	10	10	0	0	0	9
P04629	Q9NY65	0	10	10	10	10	10	10	10	10	10	0	0	0	9
P04629	Q9NXF1	0	10	10	10	10	10	10	10	10	10	0	0	0	9
P04629	Q9NXC5	0	10	10	10	10	10	10	10	10	10	0	0	0	9
P04629	Q9NX63	0	10	10	10	10	10	10	10	10	10	0	0	0	9
P04629	Q9NWY4	0	10	10	10	10	10	10	10	10	10	0	0	0	9
P04629	Q9NWB6	0	10	10	10	10	10	10	10	10	10	0	0	0	9
P04629	Q9NW82	0	10	10	10	10	10	10	10	10	10	0	0	0	9
P04629	Q9NW13	0	10	10	10	10	10	10	10	10	10	0	0	0	9
P04629	Q9NW08	0	10	10	10	10	10	10	10	10	10	0	0	0	9
P04629	Q9NVU7	0	10	10	10	10	10	10	10	10	10	0	0	0	9
P04629	Q9NVP1	0	10	10	10	10	10	10	10	10	10	0	0	0	9
P04629	Q9NVI7	0	10	10	10	10	10	10	10	10	10	0	0	0	9
P04629	Q9NVI1	0	10	10	10	10	10	10	10	10	10	0	0	0	9
P04629	Q9NVH1	0	10	10	10	10	10	10	10	10	10	0	0	0	9
P04629	Q9NVH0	0	10	10	10	10	10	10	10	10	10	0	0	0	9
P04629	Q9NVE7	0	10	10	10	10	10	10	10	10	10	0	0	0	9
P04629	Q9NVC6	0	10	10	10	10	10	10	10	10	10	0	0	0	9
P04629	Q9NV70	0	10	10	10	10	10	10	10	10	10	0	0	0	9
P04629	Q9NUU7	0	10	10	10	10	10	10	10	10	10	0	0	0	9
P04629	Q9NUQ8	0	10	10	10	10	10	10	10	10	10	0	0	0	9
P04629	Q9NUQ3	0	10	10	10	10	10	10	10	10	10	0	0	0	9
P04629	Q9NUL7	0	10	10	10	10	10	10	10	10	10	0	0	0	9
P04629	Q9NTZ6	0	10	10	10	10	10	10	10	10	10	0	0	0	9
P04629	Q9NTK5	0	10	10	10	10	10	10	10	10	10	0	0	0	9
P04629	Q9NTJ5	0	10	10	10	10	10	10	10	10	10	0	0	0	9
P04629	Q9NTJ3	0	10	10	10	10	10	10	10	10	10	0	0	0	9
P04629	Q9NTI5	0	10	10	10	10	10	10	10	10	10	0	0	0	9
P04629	Q9NSK0	0	10	10	10	10	10	10	10	10	10	0	0	0	9
P04629	Q9NSD9	0	10	10	10	10	10	10	10	10	10	0	0	0	9
P04629	Q9NRZ9	0	10	10	10	10	10	10	10	10	10	0	0	0	9
P04629	Q9NRY4	0	10	10	10	10	10	10	10	10	10	0	0	0	9
P04629	Q9NRW7	0	10	10	10	10	10	10	10	10	10	0	0	0	9
P04629	Q9NRN7	0	10	10	10	10	10	10	10	10	10	0	0	0	9
P04629	Q9NRL3	0	10	10	10	10	10	10	10	10	10	0	0	0	9
P04629	Q9NRG9	0	10	10	10	10	10	10	10	10	10	0	0	0	9
P04629	Q9NRF8	0	10	10	10	10	10	10	10	10	10	0	0	0	9
P04629	Q9NRF2	0	10	10	10	10	10	10	10	10	10	0	0	0	9
P04629	Q9NR45	0	10	10	10	10	10	10	10	10	10	0	0	0	9
P04629	Q9NR30	0	10	10	10	10	10	10	10	10	10	0	0	0	9
P04629	Q9NQX3	0	10	10	10	10	10	10	10	10	10	0	0	0	9
P04629	Q9NQW7	0	10	10	10	10	10	10	10	10	10	0	0	0	9
P04629	Q9NQT8	0	10	10	10	10	10	10	10	10	10	0	0	0	9
P04629	Q9NQC3	0	10	10	10	10	10	10	10	10	10	0	0	0	9
P04629	Q9NQ29	0	10	10	10	10	10	10	10	10	10	0	0	0	9
P04629	Q9NPQ8	0	10	10	10	10	10	10	10	10	10	0	0	0	9
P04629	Q9NPH2	0	10	10	10	10	10	10	10	10	10	0	0	0	9
P04629	Q9NPD3	0	10	10	10	10	10	10	10	10	10	0	0	0	9
P04629	Q9NP81	0	10	10	10	10	10	10	10	10	10	0	0	0	9
P04629	Q9NP79	0	10	10	10	10	10	10	10	10	10	0	0	0	9
P04629	Q9NNW5	0	10	10	10	10	10	10	10	10	10	0	0	0	9
P04629	Q9HDC9	0	10	10	10	10	10	10	10	10	10	0	0	0	9
P04629	Q9HD20	0	10	10	10	10	10	10	10	10	10	0	0	0	9
P04629	Q9HCS7	0	10	10	10	10	10	10	10	10	10	0	0	0	9
P04629	Q9HCM4	0	10	10	10	10	10	10	10	10	10	0	0	0	9
P04629	Q9HCM2	0	10	10	10	10	10	10	10	10	10	0	0	0	9
P04629	Q9HCG8	0	10	10	10	10	10	10	10	10	10	0	0	0	9
P04629	Q9HCE1	0	10	10	10	10	10	10	10	10	10	0	0	0	9
P04629	Q9HCC0	0	10	10	10	10	10	10	10	10	10	0	0	0	9
P04629	Q9HC35	0	10	10	10	10	10	10	10	10	10	0	0	0	9
P04629	Q9HBG6	0	10	10	10	10	10	10	10	10	10	0	0	0	9
P04629	Q9HB71	0	10	10	10	10	10	10	10	10	10	0	0	0	9
P04629	Q9HAV7	0	10	10	10	10	10	10	10	10	10	0	0	0	9
P04629	Q9HAV4	0	10	10	10	10	10	10	10	10	10	0	0	0	9
P04629	Q9HAU5	0	10	10	10	10	10	10	10	10	10	0	0	0	9
P04629	Q9H9Y6	0	10	10	10	10	10	10	10	10	10	0	0	0	9
P04629	Q9H9T3	0	10	10	10	10	10	10	10	10	10	0	0	0	9
P04629	Q9H9J2	0	10	10	10	10	10	10	10	10	10	0	0	0	9
P04629	Q9H9B4	0	10	10	10	10	10	10	10	10	10	0	0	0	9
P04629	Q9H9A6	0	10	10	10	10	10	10	10	10	10	0	0	0	9
P04629	Q9H936	0	10	10	10	10	10	10	10	10	10	0	0	0	9
P04629	Q9H8H2	0	10	10	10	10	10	10	10	10	10	0	0	0	9
P04629	Q9H857	0	10	10	10	10	10	10	10	10	10	0	0	0	9
P04629	Q9H845	0	10	10	10	10	10	10	10	10	10	0	0	0	9
P04629	Q9H7D7	0	10	10	10	10	10	10	10	10	10	0	0	0	9
P04629	Q9H706	0	10	10	10	10	10	10	10	10	10	0	0	0	9
P04629	Q9H6Z4	0	10	10	10	10	10	10	10	10	10	0	0	0	9
P04629	Q9H6T3	0	10	10	10	10	10	10	10	10	10	0	0	0	9
P04629	Q9H6S0	0	10	10	10	10	10	10	10	10	10	0	0	0	9
P04629	Q9H5Q4	0	10	10	10	10	10	10	10	10	10	0	0	0	9
P04629	Q9H5N1	0	10	10	10	10	10	10	10	10	10	0	0	0	9
P04629	Q9H583	0	10	10	10	10	10	10	10	10	10	0	0	0	9
P04629	Q9H4M9	0	10	10	10	10	10	10	10	10	10	0	0	0	9
P04629	Q9H4L7	0	10	10	10	10	10	10	10	10	10	0	0	0	9
P04629	Q9H4A4	0	10	10	10	10	10	10	10	10	10	0	0	0	9
P04629	Q9H3W5	0	10	10	10	10	10	10	10	10	10	0	0	0	9
P04629	Q9H3U1	0	10	10	10	10	10	10	10	10	10	0	0	0	9
P04629	Q9H3S7	0	10	10	10	10	10	10	10	10	10	0	0	0	9
P04629	Q9H3P7	0	10	10	10	10	10	10	10	10	10	0	0	0	9
P04629	Q9H3P2	0	10	10	10	10	10	10	10	10	10	0	0	0	9
P04629	Q9H307	0	10	10	10	10	10	10	10	10	10	0	0	0	9
P04629	Q9H2U1	0	10	10	10	10	10	10	10	10	10	0	0	0	9
P04629	Q9H2P0	0	10	10	10	10	10	10	10	10	10	0	0	0	9
P04629	Q9H2M9	0	10	10	10	10	10	10	10	10	10	0	0	0	9
P04629	Q9H2G2	0	10	10	10	10	10	10	10	10	10	0	0	0	9
P04629	Q9H269	0	10	10	10	10	10	10	10	10	10	0	0	0	9
P04629	Q9H267	0	10	10	10	10	10	10	10	10	10	0	0	0	9
P04629	Q9H223	0	10	10	10	10	10	10	10	10	10	0	0	0	9
P04629	Q9H1I8	0	10	10	10	10	10	10	10	10	10	0	0	0	9
P04629	Q9H1B7	0	10	10	10	10	10	10	10	10	10	0	0	0	9
P04629	Q9H1A4	0	10	10	10	10	10	10	10	10	10	0	0	0	9
P04629	Q9H0D6	0	10	10	10	10	10	10	10	10	10	0	0	0	9
P04629	Q9H0B6	0	10	10	10	10	10	10	10	10	10	0	0	0	9
P04629	Q9H0A0	0	10	10	10	10	10	10	10	10	10	0	0	0	9
P04629	Q9H089	0	10	10	10	10	10	10	10	10	10	0	0	0	9
P04629	Q9H078	0	10	10	10	10	10	10	10	10	10	0	0	0	9
P04629	Q9GZR7	0	10	10	10	10	10	10	10	10	10	0	0	0	9
P04629	Q9C0D5	0	10	10	10	10	10	10	10	10	10	0	0	0	9
P04629	Q9C0D3	0	10	10	10	10	10	10	10	10	10	0	0	0	9
P04629	Q9C0C9	0	10	10	10	10	10	10	10	10	10	0	0	0	9
P04629	Q9C0C2	0	10	10	10	10	10	10	10	10	10	0	0	0	9
P04629	Q9BZZ5	0	10	10	10	10	10	10	10	10	10	0	0	0	9
P04629	Q9BZQ6	0	10	10	10	10	10	10	10	10	10	0	0	0	9
P04629	Q9BZL6	0	10	10	10	10	10	10	10	10	10	0	0	0	9
P04629	Q9BZK7	0	10	10	10	10	10	10	10	10	10	0	0	0	9
P04629	Q9BZJ0	0	10	10	10	10	10	10	10	10	10	0	0	0	9
P04629	Q9BZF1	0	10	10	10	10	10	10	10	10	10	0	0	0	9
P04629	Q9BZE9	0	10	10	10	10	10	10	10	10	10	0	0	0	9
P04629	Q9BZE4	0	10	10	10	10	10	10	10	10	10	0	0	0	9
P04629	Q9BZE1	0	10	10	10	10	10	10	10	10	10	0	0	0	9
P04629	Q9BY44	0	10	10	10	10	10	10	10	10	10	0	0	0	9
P04629	Q9BXW9	0	10	10	10	10	10	10	10	10	10	0	0	0	9
P04629	Q9BXS5	0	10	10	10	10	10	10	10	10	10	0	0	0	9
P04629	Q9BXS4	0	10	10	10	10	10	10	10	10	10	0	0	0	9
P04629	Q9BXP5	0	10	10	10	10	10	10	10	10	10	0	0	0	9
P04629	Q9BXJ9	0	10	10	10	10	10	10	10	10	10	0	0	0	9
P04629	Q9BXB4	0	10	10	10	10	10	10	10	10	10	0	0	0	9
P04629	Q9BX66	0	10	10	10	10	10	10	10	10	10	0	0	0	9
P04629	Q9BX40	0	10	10	10	10	10	10	10	10	10	0	0	0	9
P04629	Q9BWU0	0	10	10	10	10	10	10	10	10	10	0	0	0	9
P04629	Q9BWH6	0	10	10	10	10	10	10	10	10	10	0	0	0	9
P04629	Q9BWF3	0	10	10	10	10	10	10	10	10	10	0	0	0	9
P04629	Q9BWD1	0	10	10	10	10	10	10	10	10	10	0	0	0	9
P04629	Q9BW92	0	10	10	10	10	10	10	10	10	10	0	0	0	9
P04629	Q9BW27	0	10	10	10	10	10	10	10	10	10	0	0	0	9
P04629	Q9BVQ7	0	10	10	10	10	10	10	10	10	10	0	0	0	9
P04629	Q9BVP2	0	10	10	10	10	10	10	10	10	10	0	0	0	9
P04629	Q9BVA1	0	10	10	10	10	10	10	10	10	10	0	0	0	9
P04629	Q9BV44	0	10	10	10	10	10	10	10	10	10	0	0	0	9
P04629	Q9BV20	0	10	10	10	10	10	10	10	10	10	0	0	0	9
P04629	Q9BUQ8	0	10	10	10	10	10	10	10	10	10	0	0	0	9
P04629	Q9BUK6	0	10	10	10	10	10	10	10	10	10	0	0	0	9
P04629	Q9BUJ2	0	10	10	10	10	10	10	10	10	10	0	0	0	9
P04629	Q9BTW9	0	10	10	10	10	10	10	10	10	10	0	0	0	9
P04629	Q9BTV4	0	10	10	10	10	10	10	10	10	10	0	0	0	9
P04629	Q9BTE3	0	10	10	10	10	10	10	10	10	10	0	0	0	9
P04629	Q9BTD8	0	10	10	10	10	10	10	10	10	10	0	0	0	9
P04629	Q9BT88	0	10	10	10	10	10	10	10	10	10	0	0	0	9
P04629	Q9BT78	0	10	10	10	10	10	10	10	10	10	0	0	0	9
P04629	Q9BSJ8	0	10	10	10	10	10	10	10	10	10	0	0	0	9
P04629	Q9BSJ2	0	10	10	10	10	10	10	10	10	10	0	0	0	9
P04629	Q9BS26	0	10	10	10	10	10	10	10	10	10	0	0	0	9
P04629	Q9BRS2	0	10	10	10	10	10	10	10	10	10	0	0	0	9
P04629	Q9BRJ6	0	10	10	10	10	10	10	10	10	10	0	0	0	9
P04629	Q9BQG0	0	10	10	10	10	10	10	10	10	10	0	0	0	9
P04629	Q9BQA1	0	10	10	10	10	10	10	10	10	10	0	0	0	9
P04629	Q9BQ52	0	10	10	10	10	10	10	10	10	10	0	0	0	9
P04629	Q9BPX3	0	10	10	10	10	10	10	10	10	10	0	0	0	9
P04629	Q9BPW8	0	10	10	10	10	10	10	10	10	10	0	0	0	9
P04629	Q99873	0	10	10	10	10	10	10	10	10	10	0	0	0	9
P04629	Q99832	0	10	10	10	10	10	10	10	10	10	0	0	0	9
P04629	Q99829	0	10	10	10	10	10	10	10	10	10	0	0	0	9
P04629	Q99816	0	10	10	10	10	10	10	10	10	10	0	0	0	9
P04629	Q99798	0	10	10	10	10	10	10	10	10	10	0	0	0	9
P04629	Q99733	0	10	10	10	10	10	10	10	10	10	0	0	0	9
P04629	Q99729	0	10	10	10	10	10	10	10	10	10	0	0	0	9
P04629	Q99714	0	10	10	10	10	10	10	10	10	10	0	0	0	9
P04629	Q99707	0	10	10	10	10	10	10	10	10	10	0	0	0	9
P04629	Q99700	0	10	10	10	10	10	10	10	10	10	0	0	0	9
P04629	Q99661	0	10	10	10	10	10	10	10	10	10	0	0	0	9
P04629	Q99615	0	10	10	10	10	10	10	10	10	10	0	0	0	9
P04629	Q99613	0	10	10	10	10	10	10	10	10	10	0	0	0	9
P04629	Q99575	0	10	10	10	10	10	10	10	10	10	0	0	0	9
P04629	Q99570	0	10	10	10	10	10	10	10	10	10	0	0	0	9
P04629	Q99567	0	10	10	10	10	10	10	10	10	10	0	0	0	9
P04629	Q99543	0	10	10	10	10	10	10	10	10	10	0	0	0	9
P04629	Q99536	0	10	10	10	10	10	10	10	10	10	0	0	0	9
P04629	Q99523	0	10	10	10	10	10	10	10	10	10	0	0	0	9
P04629	Q99460	0	10	10	10	10	10	10	10	10	10	0	0	0	9
P04629	Q99459	0	10	10	10	10	10	10	10	10	10	0	0	0	9
P04629	Q99426	0	10	10	10	10	10	10	10	10	10	0	0	0	9
P04629	Q99081	0	10	10	10	10	10	10	10	10	10	0	0	0	9
P04629	Q96TA2	0	10	10	10	10	10	10	10	10	10	0	0	0	9
P04629	Q96TA1	0	10	10	10	10	10	10	10	10	10	0	0	0	9
P04629	Q96T76	0	10	10	10	10	10	10	10	10	10	0	0	0	9
P04629	Q96T51	0	10	10	10	10	10	10	10	10	10	0	0	0	9
P04629	Q96T37	0	10	10	10	10	10	10	10	10	10	0	0	0	9
P04629	Q96ST3	0	10	10	10	10	10	10	10	10	10	0	0	0	9
P04629	Q96SB8	0	10	10	10	10	10	10	10	10	10	0	0	0	9
P04629	Q96SB4	0	10	10	10	10	10	10	10	10	10	0	0	0	9
P04629	Q96S59	0	10	10	10	10	10	10	10	10	10	0	0	0	9
P04629	Q96S55	0	10	10	10	10	10	10	10	10	10	0	0	0	9
P04629	Q96RT8	0	10	10	10	10	10	10	10	10	10	0	0	0	9
P04629	Q96RT7	0	10	10	10	10	10	10	10	10	10	0	0	0	9
P04629	Q96RS6	0	10	10	10	10	10	10	10	10	10	0	0	0	9
P04629	Q96RQ3	0	10	10	10	10	10	10	10	10	10	0	0	0	9
P04629	Q96RP9	0	10	10	10	10	10	10	10	10	10	0	0	0	9
P04629	Q96RK0	0	10	10	10	10	10	10	10	10	10	0	0	0	9
P04629	Q96QK1	0	10	10	10	10	10	10	10	10	10	0	0	0	9
P04629	Q96QC0	0	10	10	10	10	10	10	10	10	10	0	0	0	9
P04629	Q96Q05	0	10	10	10	10	10	10	10	10	10	0	0	0	9
P04629	Q96PZ0	0	10	10	10	10	10	10	10	10	10	0	0	0	9
P04629	Q96PY5	0	10	10	10	10	10	10	10	10	10	0	0	0	9
P04629	Q96PU8	0	10	10	10	10	10	10	10	10	10	0	0	0	9
P04629	Q96PU5	0	10	10	10	10	10	10	10	10	10	0	0	0	9
P04629	Q96PK6	0	10	10	10	10	10	10	10	10	10	0	0	0	9
P04629	Q96PE3	0	10	10	10	10	10	10	10	10	10	0	0	0	9
P04629	Q96P70	0	10	10	10	10	10	10	10	10	10	0	0	0	9
P04629	Q96P48	0	10	10	10	10	10	10	10	10	10	0	0	0	9
P04629	Q96P47	0	10	10	10	10	10	10	10	10	10	0	0	0	9
P04629	Q96N67	0	10	10	10	10	10	10	10	10	10	0	0	0	9
P04629	Q96ME1	0	10	10	10	10	10	10	10	10	10	0	0	0	9
P04629	Q96L92	0	10	10	10	10	10	10	10	10	10	0	0	0	9
P04629	Q96KP1	0	10	10	10	10	10	10	10	10	10	0	0	0	9
P04629	Q96KG9	0	10	10	10	10	10	10	10	10	10	0	0	0	9
P04629	Q96KA5	0	10	10	10	10	10	10	10	10	10	0	0	0	9
P04629	Q96K76	0	10	10	10	10	10	10	10	10	10	0	0	0	9
P04629	Q96JJ7	0	10	10	10	10	10	10	10	10	10	0	0	0	9
P04629	Q96JH7	0	10	10	10	10	10	10	10	10	10	0	0	0	9
P04629	Q96JG6	0	10	10	10	10	10	10	10	10	10	0	0	0	9
P04629	Q96JC1	0	10	10	10	10	10	10	10	10	10	0	0	0	9
P04629	Q96JB2	0	10	10	10	10	10	10	10	10	10	0	0	0	9
P04629	Q96IZ7	0	10	10	10	10	10	10	10	10	10	0	0	0	9
P04629	Q96II8	0	10	10	10	10	10	10	10	10	10	0	0	0	9
P04629	Q96I24	0	10	10	10	10	10	10	10	10	10	0	0	0	9
P04629	Q96HY7	0	10	10	10	10	10	10	10	10	10	0	0	0	9
P04629	Q96HW7	0	10	10	10	10	10	10	10	10	10	0	0	0	9
P04629	Q96HU1	0	10	10	10	10	10	10	10	10	10	0	0	0	9
P04629	Q96HS1	0	10	10	10	10	10	10	10	10	10	0	0	0	9
P04629	Q96HE7	0	10	10	10	10	10	10	10	10	10	0	0	0	9
P04629	Q96HC4	0	10	10	10	10	10	10	10	10	10	0	0	0	9
P04629	Q96HA7	0	10	10	10	10	10	10	10	10	10	0	0	0	9
P04629	Q96GQ7	0	10	10	10	10	10	10	10	10	10	0	0	0	9
P04629	Q96GM5	0	10	10	10	10	10	10	10	10	10	0	0	0	9
P04629	Q96GD0	0	10	10	10	10	10	10	10	10	10	0	0	0	9
P04629	Q96GA3	0	10	10	10	10	10	10	10	10	10	0	0	0	9
P04629	Q96G03	0	10	10	10	10	10	10	10	10	10	0	0	0	9
P04629	Q96G01	0	10	10	10	10	10	10	10	10	10	0	0	0	9
P04629	Q96F86	0	10	10	10	10	10	10	10	10	10	0	0	0	9
P04629	Q96EY7	0	10	10	10	10	10	10	10	10	10	0	0	0	9
P04629	Q96EP0	0	10	10	10	10	10	10	10	10	10	0	0	0	9
P04629	Q96EK5	0	10	10	10	10	10	10	10	10	10	0	0	0	9
P04629	Q96DV4	0	10	10	10	10	10	10	10	10	10	0	0	0	9
P04629	Q96DH6	0	10	10	10	10	10	10	10	10	10	0	0	0	9
P04629	Q96D71	0	10	10	10	10	10	10	10	10	10	0	0	0	9
P04629	Q96CW5	0	10	10	10	10	10	10	10	10	10	0	0	0	9
P04629	Q96CT7	0	10	10	10	10	10	10	10	10	10	0	0	0	9
P04629	Q96CN7	0	10	10	10	10	10	10	10	10	10	0	0	0	9
P04629	Q96C86	0	10	10	10	10	10	10	10	10	10	0	0	0	9
P04629	Q96BY7	0	10	10	10	10	10	10	10	10	10	0	0	0	9
P04629	Q96BP3	0	10	10	10	10	10	10	10	10	10	0	0	0	9
P04629	Q96AY4	0	10	10	10	10	10	10	10	10	10	0	0	0	9
P04629	Q96AX1	0	10	10	10	10	10	10	10	10	10	0	0	0	9
P04629	Q96AQ6	0	10	10	10	10	10	10	10	10	10	0	0	0	9
P04629	Q96AG4	0	10	10	10	10	10	10	10	10	10	0	0	0	9
P04629	Q96AC1	0	10	10	10	10	10	10	10	10	10	0	0	0	9
P04629	Q96A65	0	10	10	10	10	10	10	10	10	10	0	0	0	9
P04629	Q96A35	0	10	10	10	10	10	10	10	10	10	0	0	0	9
P04629	Q96A33	0	10	10	10	10	10	10	10	10	10	0	0	0	9
P04629	Q969Z0	0	10	10	10	10	10	10	10	10	10	0	0	0	9
P04629	Q969X5	0	10	10	10	10	10	10	10	10	10	0	0	0	9
P04629	Q969V3	0	10	10	10	10	10	10	10	10	10	0	0	0	9
P04629	Q969N2	0	10	10	10	10	10	10	10	10	10	0	0	0	9
P04629	Q93100	0	10	10	10	10	10	10	10	10	10	0	0	0	9
P04629	Q93074	0	10	10	10	10	10	10	10	10	10	0	0	0	9
P04629	Q93050	0	10	10	10	10	10	10	10	10	10	0	0	0	9
P04629	Q93034	0	10	10	10	10	10	10	10	10	10	0	0	0	9
P04629	Q93009	0	10	10	10	10	10	10	10	10	10	0	0	0	9
P04629	Q93008	0	10	10	10	10	10	10	10	10	10	0	0	0	9
P04629	Q92997	0	10	10	10	10	10	10	10	10	10	0	0	0	9
P04629	Q92974	0	10	10	10	10	10	10	10	10	10	0	0	0	9
P04629	Q92973	0	10	10	10	10	10	10	10	10	10	0	0	0	9
P04629	Q92945	0	10	10	10	10	10	10	10	10	10	0	0	0	9
P04629	Q92925	0	10	10	10	10	10	10	10	10	10	0	0	0	9
P04629	Q92922	0	10	10	10	10	10	10	10	10	10	0	0	0	9
P04629	Q92917	0	10	10	10	10	10	10	10	10	10	0	0	0	9
P04629	Q92905	0	10	10	10	10	10	10	10	10	10	0	0	0	9
P04629	Q92900	0	10	10	10	10	10	10	10	10	10	0	0	0	9
P04629	Q92896	0	10	10	10	10	10	10	10	10	10	0	0	0	9
P04629	Q92889	0	10	10	10	10	10	10	10	10	10	0	0	0	9
P04629	Q92888	0	10	10	10	10	10	10	10	10	10	0	0	0	9
P04629	Q92878	0	10	10	10	10	10	10	10	10	10	0	0	0	9
P04629	Q92845	0	10	10	10	10	10	10	10	10	10	0	0	0	9
P04629	Q92823	0	10	10	10	10	10	10	10	10	10	0	0	0	9
P04629	Q92820	0	10	10	10	10	10	10	10	10	10	0	0	0	9
P04629	Q92797	0	10	10	10	10	10	10	10	10	10	0	0	0	9
P04629	Q92786	0	10	10	10	10	10	10	10	10	10	0	0	0	9
P04629	Q92783	0	10	10	10	10	10	10	10	10	10	0	0	0	9
P04629	Q92734	0	10	10	10	10	10	10	10	10	10	0	0	0	9
P04629	Q92688	0	10	10	10	10	10	10	10	10	10	0	0	0	9
P04629	Q92626	0	10	10	10	10	10	10	10	10	10	0	0	0	9
P04629	Q92621	0	10	10	10	10	10	10	10	10	10	0	0	0	9
P04629	Q92620	0	10	10	10	10	10	10	10	10	10	0	0	0	9
P04629	Q92616	0	10	10	10	10	10	10	10	10	10	0	0	0	9
P04629	Q92609	0	10	10	10	10	10	10	10	10	10	0	0	0	9
P04629	Q92600	0	10	10	10	10	10	10	10	10	10	0	0	0	9
P04629	Q92598	0	10	10	10	10	10	10	10	10	10	0	0	0	9
P04629	Q92558	0	10	10	10	10	10	10	10	10	10	0	0	0	9
P04629	Q92556	0	10	10	10	10	10	10	10	10	10	0	0	0	9
P04629	Q92552	0	10	10	10	10	10	10	10	10	10	0	0	0	9
P04629	Q92545	0	10	10	10	10	10	10	10	10	10	0	0	0	9
P04629	Q92542	0	10	10	10	10	10	10	10	10	10	0	0	0	9
P04629	Q92541	0	10	10	10	10	10	10	10	10	10	0	0	0	9
P04629	Q92538	0	10	10	10	10	10	10	10	10	10	0	0	0	9
P04629	Q92522	0	10	10	10	10	10	10	10	10	10	0	0	0	9
P04629	Q92499	0	10	10	10	10	10	10	10	10	10	0	0	0	9
P04629	Q8WZA9	0	10	10	10	10	10	10	10	10	10	0	0	0	9
P04629	Q8WYA0	0	10	10	10	10	10	10	10	10	10	0	0	0	9
P04629	Q8WY54	0	10	10	10	10	10	10	10	10	10	0	0	0	9
P04629	Q8WXX5	0	10	10	10	10	10	10	10	10	10	0	0	0	9
P04629	Q8WXW3	0	10	10	10	10	10	10	10	10	10	0	0	0	9
P04629	Q8WXI9	0	10	10	10	10	10	10	10	10	10	0	0	0	9
P04629	Q8WXG6	0	10	10	10	10	10	10	10	10	10	0	0	0	9
P04629	Q8WXF7	0	10	10	10	10	10	10	10	10	10	0	0	0	9
P04629	Q8WXA9	0	10	10	10	10	10	10	10	10	10	0	0	0	9
P04629	Q8WX93	0	10	10	10	10	10	10	10	10	10	0	0	0	9
P04629	Q8WX92	0	10	10	10	10	10	10	10	10	10	0	0	0	9
P04629	Q8WWY3	0	10	10	10	10	10	10	10	10	10	0	0	0	9
P04629	Q8WWN8	0	10	10	10	10	10	10	10	10	10	0	0	0	9
P04629	Q8WWM7	0	10	10	10	10	10	10	10	10	10	0	0	0	9
P04629	Q8WVT3	0	10	10	10	10	10	10	10	10	10	0	0	0	9
P04629	Q8WVM8	0	10	10	10	10	10	10	10	10	10	0	0	0	9
P04629	Q8WVC0	0	10	10	10	10	10	10	10	10	10	0	0	0	9
P04629	Q8WVB6	0	10	10	10	10	10	10	10	10	10	0	0	0	9
P04629	Q8WUQ7	0	10	10	10	10	10	10	10	10	10	0	0	0	9
P04629	Q8WUM4	0	10	10	10	10	10	10	10	10	10	0	0	0	9
P04629	Q8WUM0	0	10	10	10	10	10	10	10	10	10	0	0	0	9
P04629	Q8WUA4	0	10	10	10	10	10	10	10	10	10	0	0	0	9
P04629	Q8WUA2	0	10	10	10	10	10	10	10	10	10	0	0	0	9
P04629	Q8WU90	0	10	10	10	10	10	10	10	10	10	0	0	0	9
P04629	Q8WU20	0	10	10	10	10	10	10	10	10	10	0	0	0	9
P04629	Q8WTW3	0	10	10	10	10	10	10	10	10	10	0	0	0	9
P04629	Q8WTT2	0	10	10	10	10	10	10	10	10	10	0	0	0	9
P04629	Q8TF05	0	10	10	10	10	10	10	10	10	10	0	0	0	9
P04629	Q8TEV9	0	10	10	10	10	10	10	10	10	10	0	0	0	9
P04629	Q8TER5	0	10	10	10	10	10	10	10	10	10	0	0	0	9
P04629	Q8TEQ6	0	10	10	10	10	10	10	10	10	10	0	0	0	9
P04629	Q8TEM1	0	10	10	10	10	10	10	10	10	10	0	0	0	9
P04629	Q8TDZ2	0	10	10	10	10	10	10	10	10	10	0	0	0	9
P04629	Q8TDN6	0	10	10	10	10	10	10	10	10	10	0	0	0	9
P04629	Q8TD19	0	10	10	10	10	10	10	10	10	10	0	0	0	9
P04629	Q8TCY9	0	10	10	10	10	10	10	10	10	10	0	0	0	9
P04629	Q8TCT0	0	10	10	10	10	10	10	10	10	10	0	0	0	9
P04629	Q8TCS8	0	10	10	10	10	10	10	10	10	10	0	0	0	9
P04629	Q8TCJ2	0	10	10	10	10	10	10	10	10	10	0	0	0	9
P04629	Q8TCG1	0	10	10	10	10	10	10	10	10	10	0	0	0	9
P04629	Q8TC12	0	10	10	10	10	10	10	10	10	10	0	0	0	9
P04629	Q8TC07	0	10	10	10	10	10	10	10	10	10	0	0	0	9
P04629	Q8TB72	0	10	10	10	10	10	10	10	10	10	0	0	0	9
P04629	Q8TB36	0	10	10	10	10	10	10	10	10	10	0	0	0	9
P04629	Q8TAT6	0	10	10	10	10	10	10	10	10	10	0	0	0	9
P04629	Q8TAQ2	0	10	10	10	10	10	10	10	10	10	0	0	0	9
P04629	Q8TAG9	0	10	10	10	10	10	10	10	10	10	0	0	0	9
P04629	Q8TAF3	0	10	10	10	10	10	10	10	10	10	0	0	0	9
P04629	Q8TA86	0	10	10	10	10	10	10	10	10	10	0	0	0	9
P04629	Q8NI36	0	10	10	10	10	10	10	10	10	10	0	0	0	9
P04629	Q8NI27	0	10	10	10	10	10	10	10	10	10	0	0	0	9
P04629	Q8NHQ9	0	10	10	10	10	10	10	10	10	10	0	0	0	9
P04629	Q8NHH9	0	10	10	10	10	10	10	10	10	10	0	0	0	9
P04629	Q8NF91	0	10	10	10	10	10	10	10	10	10	0	0	0	9
P04629	Q8NF37	0	10	10	10	10	10	10	10	10	10	0	0	0	9
P04629	Q8NEU8	0	10	10	10	10	10	10	10	10	10	0	0	0	9
P04629	Q8NEB9	0	10	10	10	10	10	10	10	10	10	0	0	0	9
P04629	Q8NE71	0	10	10	10	10	10	10	10	10	10	0	0	0	9
P04629	Q8NDT2	0	10	10	10	10	10	10	10	10	10	0	0	0	9
P04629	Q8ND56	0	10	10	10	10	10	10	10	10	10	0	0	0	9
P04629	Q8ND24	0	10	10	10	10	10	10	10	10	10	0	0	0	9
P04629	Q8ND04	0	10	10	10	10	10	10	10	10	10	0	0	0	9
P04629	Q8NCN5	0	10	10	10	10	10	10	10	10	10	0	0	0	9
P04629	Q8NCA5	0	10	10	10	10	10	10	10	10	10	0	0	0	9
P04629	Q8NC51	0	10	10	10	10	10	10	10	10	10	0	0	0	9
P04629	Q8NBX0	0	10	10	10	10	10	10	10	10	10	0	0	0	9
P04629	Q8NBS9	0	10	10	10	10	10	10	10	10	10	0	0	0	9
P04629	Q8NBQ5	0	10	10	10	10	10	10	10	10	10	0	0	0	9
P04629	Q8NBJ5	0	10	10	10	10	10	10	10	10	10	0	0	0	9
P04629	Q8NBF6	0	10	10	10	10	10	10	10	10	10	0	0	0	9
P04629	Q8NBF2	0	10	10	10	10	10	10	10	10	10	0	0	0	9
P04629	Q8NB90	0	10	10	10	10	10	10	10	10	10	0	0	0	9
P04629	Q8N8S7	0	10	10	10	10	10	10	10	10	10	0	0	0	9
P04629	Q8N8A2	0	10	10	10	10	10	10	10	10	10	0	0	0	9
P04629	Q8N7H5	0	10	10	10	10	10	10	10	10	10	0	0	0	9
P04629	Q8N766	0	10	10	10	10	10	10	10	10	10	0	0	0	9
P04629	Q8N6R0	0	10	10	10	10	10	10	10	10	10	0	0	0	9
P04629	Q8N684	0	10	10	10	10	10	10	10	10	10	0	0	0	9
P04629	Q8N5C6	0	10	10	10	10	10	10	10	10	10	0	0	0	9
P04629	Q8N3U4	0	10	10	10	10	10	10	10	10	10	0	0	0	9
P04629	Q8N3P4	0	10	10	10	10	10	10	10	10	10	0	0	0	9
P04629	Q8N3C0	0	10	10	10	10	10	10	10	10	10	0	0	0	9
P04629	Q8N1I0	0	10	10	10	10	10	10	10	10	10	0	0	0	9
P04629	Q8N1G4	0	10	10	10	10	10	10	10	10	10	0	0	0	9
P04629	Q8N1G2	0	10	10	10	10	10	10	10	10	10	0	0	0	9
P04629	Q8N1F8	0	10	10	10	10	10	10	10	10	10	0	0	0	9
P04629	Q8N1F7	0	10	10	10	10	10	10	10	10	10	0	0	0	9
P04629	Q8N1B4	0	10	10	10	10	10	10	10	10	10	0	0	0	9
P04629	Q8N163	0	10	10	10	10	10	10	10	10	10	0	0	0	9
P04629	Q8N122	0	10	10	10	10	10	10	10	10	10	0	0	0	9
P04629	Q8IZJ1	0	10	10	10	10	10	10	10	10	10	0	0	0	9
P04629	Q8IZH2	0	10	10	10	10	10	10	10	10	10	0	0	0	9
P04629	Q8IZ83	0	10	10	10	10	10	10	10	10	10	0	0	0	9
P04629	Q8IZ07	0	10	10	10	10	10	10	10	10	10	0	0	0	9
P04629	Q8IYI6	0	10	10	10	10	10	10	10	10	10	0	0	0	9
P04629	Q8IYB8	0	10	10	10	10	10	10	10	10	10	0	0	0	9
P04629	Q8IYB7	0	10	10	10	10	10	10	10	10	10	0	0	0	9
P04629	Q8IYB3	0	10	10	10	10	10	10	10	10	10	0	0	0	9
P04629	Q8IY81	0	10	10	10	10	10	10	10	10	10	0	0	0	9
P04629	Q8IY17	0	10	10	10	10	10	10	10	10	10	0	0	0	9
P04629	Q8IXI2	0	10	10	10	10	10	10	10	10	10	0	0	0	9
P04629	Q8IXI1	0	10	10	10	10	10	10	10	10	10	0	0	0	9
P04629	Q8IXB1	0	10	10	10	10	10	10	10	10	10	0	0	0	9
P04629	Q8IX18	0	10	10	10	10	10	10	10	10	10	0	0	0	9
P04629	Q8IX12	0	10	10	10	10	10	10	10	10	10	0	0	0	9
P04629	Q8IWX8	0	10	10	10	10	10	10	10	10	10	0	0	0	9
P04629	Q8IWV7	0	10	10	10	10	10	10	10	10	10	0	0	0	9
P04629	Q8IWT6	0	10	10	10	10	10	10	10	10	10	0	0	0	9
P04629	Q8IWS0	0	10	10	10	10	10	10	10	10	10	0	0	0	9
P04629	Q8IWR0	0	10	10	10	10	10	10	10	10	10	0	0	0	9
P04629	Q8IWA4	0	10	10	10	10	10	10	10	10	10	0	0	0	9
P04629	Q8IW35	0	10	10	10	10	10	10	10	10	10	0	0	0	9
P04629	Q8IVH8	0	10	10	10	10	10	10	10	10	10	0	0	0	9
P04629	Q8IVF7	0	10	10	10	10	10	10	10	10	10	0	0	0	9
P04629	Q8IV08	0	10	10	10	10	10	10	10	10	10	0	0	0	9
P04629	Q8IU81	0	10	10	10	10	10	10	10	10	10	0	0	0	9
P04629	Q86YT6	0	10	10	10	10	10	10	10	10	10	0	0	0	9
P04629	Q86YS7	0	10	10	10	10	10	10	10	10	10	0	0	0	9
P04629	Q86YR5	0	10	10	10	10	10	10	10	10	10	0	0	0	9
P04629	Q86Y56	0	10	10	10	10	10	10	10	10	10	0	0	0	9
P04629	Q86XP3	0	10	10	10	10	10	10	10	10	10	0	0	0	9
P04629	Q86XL3	0	10	10	10	10	10	10	10	10	10	0	0	0	9
P04629	Q86XI2	0	10	10	10	10	10	10	10	10	10	0	0	0	9
P04629	Q86X55	0	10	10	10	10	10	10	10	10	10	0	0	0	9
P04629	Q86X10	0	10	10	10	10	10	10	10	10	10	0	0	0	9
P04629	Q86WJ1	0	10	10	10	10	10	10	10	10	10	0	0	0	9
P04629	Q86WG5	0	10	10	10	10	10	10	10	10	10	0	0	0	9
P04629	Q86W92	0	10	10	10	10	10	10	10	10	10	0	0	0	9
P04629	Q86W56	0	10	10	10	10	10	10	10	10	10	0	0	0	9
P04629	Q86W50	0	10	10	10	10	10	10	10	10	10	0	0	0	9
P04629	Q86VS8	0	10	10	10	10	10	10	10	10	10	0	0	0	9
P04629	Q86VP6	0	10	10	10	10	10	10	10	10	10	0	0	0	9
P04629	Q86VP1	0	10	10	10	10	10	10	10	10	10	0	0	0	9
P04629	Q86VM9	0	10	10	10	10	10	10	10	10	10	0	0	0	9
P04629	Q86VI3	0	10	10	10	10	10	10	10	10	10	0	0	0	9
P04629	Q86V81	0	10	10	10	10	10	10	10	10	10	0	0	0	9
P04629	Q86UV5	0	10	10	10	10	10	10	10	10	10	0	0	0	9
P04629	Q86UP2	0	10	10	10	10	10	10	10	10	10	0	0	0	9
P04629	Q86UE8	0	10	10	10	10	10	10	10	10	10	0	0	0	9
P04629	Q86UE4	0	10	10	10	10	10	10	10	10	10	0	0	0	9
P04629	Q86U42	0	10	10	10	10	10	10	10	10	10	0	0	0	9
P04629	Q86TX2	0	10	10	10	10	10	10	10	10	10	0	0	0	9
P04629	Q86TP1	0	10	10	10	10	10	10	10	10	10	0	0	0	9
P04629	Q86TI2	0	10	10	10	10	10	10	10	10	10	0	0	0	9
P04629	Q86TB9	0	10	10	10	10	10	10	10	10	10	0	0	0	9
P04629	Q7Z6Z7	0	10	10	10	10	10	10	10	10	10	0	0	0	9
P04629	Q7Z5L9	0	10	10	10	10	10	10	10	10	10	0	0	0	9
P04629	Q7Z5K2	0	10	10	10	10	10	10	10	10	10	0	0	0	9
P04629	Q7Z4V5	0	10	10	10	10	10	10	10	10	10	0	0	0	9
P04629	Q7Z4S6	0	10	10	10	10	10	10	10	10	10	0	0	0	9
P04629	Q7Z4K8	0	10	10	10	10	10	10	10	10	10	0	0	0	9
P04629	Q7Z4H7	0	10	10	10	10	10	10	10	10	10	0	0	0	9
P04629	Q7Z478	0	10	10	10	10	10	10	10	10	10	0	0	0	9
P04629	Q7Z460	0	10	10	10	10	10	10	10	10	10	0	0	0	9
P04629	Q7Z3U7	0	10	10	10	10	10	10	10	10	10	0	0	0	9
P04629	Q7Z3B4	0	10	10	10	10	10	10	10	10	10	0	0	0	9
P04629	Q7Z392	0	10	10	10	10	10	10	10	10	10	0	0	0	9
P04629	Q7Z2Z2	0	10	10	10	10	10	10	10	10	10	0	0	0	9
P04629	Q7Z2W4	0	10	10	10	10	10	10	10	10	10	0	0	0	9
P04629	Q7Z2T5	0	10	10	10	10	10	10	10	10	10	0	0	0	9
P04629	Q7Z2K8	0	10	10	10	10	10	10	10	10	10	0	0	0	9
P04629	Q7LBC6	0	10	10	10	10	10	10	10	10	10	0	0	0	9
P04629	Q7L8L6	0	10	10	10	10	10	10	10	10	10	0	0	0	9
P04629	Q7L7X3	0	10	10	10	10	10	10	10	10	10	0	0	0	9
P04629	Q7L775	0	10	10	10	10	10	10	10	10	10	0	0	0	9
P04629	Q7L5N7	0	10	10	10	10	10	10	10	10	10	0	0	0	9
P04629	Q7L5N1	0	10	10	10	10	10	10	10	10	10	0	0	0	9
P04629	Q7L5D6	0	10	10	10	10	10	10	10	10	10	0	0	0	9
P04629	Q7L576	0	10	10	10	10	10	10	10	10	10	0	0	0	9
P04629	Q7L4I2	0	10	10	10	10	10	10	10	10	10	0	0	0	9
P04629	Q7L2J0	0	10	10	10	10	10	10	10	10	10	0	0	0	9
P04629	Q7L2H7	0	10	10	10	10	10	10	10	10	10	0	0	0	9
P04629	Q7L2E3	0	10	10	10	10	10	10	10	10	10	0	0	0	9
P04629	Q7L1Q6	0	10	10	10	10	10	10	10	10	10	0	0	0	9
P04629	Q7L0Y3	0	10	10	10	10	10	10	10	10	10	0	0	0	9
P04629	Q7L0J3	0	10	10	10	10	10	10	10	10	10	0	0	0	9
P04629	Q7L099	0	10	10	10	10	10	10	10	10	10	0	0	0	9
P04629	Q7L014	0	10	10	10	10	10	10	10	10	10	0	0	0	9
P04629	Q7KZI7	0	10	10	10	10	10	10	10	10	10	0	0	0	9
P04629	Q7KZF4	0	10	10	10	10	10	10	10	10	10	0	0	0	9
P04629	Q71U36	0	10	10	10	10	10	10	10	10	10	0	0	0	9
P04629	Q71RC2	0	10	10	10	10	10	10	10	10	10	0	0	0	9
P04629	Q6ZU35	0	10	10	10	10	10	10	10	10	10	0	0	0	9
P04629	Q6ZNH5	0	10	10	10	10	10	10	10	10	10	0	0	0	9
P04629	Q6ZN55	0	10	10	10	10	10	10	10	10	10	0	0	0	9
P04629	Q6ZMV7	0	10	10	10	10	10	10	10	10	10	0	0	0	9
P04629	Q6YP21	0	10	10	10	10	10	10	10	10	10	0	0	0	9
P04629	Q6YHU6	0	10	10	10	10	10	10	10	10	10	0	0	0	9
P04629	Q6VY07	0	10	10	10	10	10	10	10	10	10	0	0	0	9
P04629	Q6UXN9	0	10	10	10	10	10	10	10	10	10	0	0	0	9
P04629	Q6UXK2	0	10	10	10	10	10	10	10	10	10	0	0	0	9
P04629	Q6UXD5	0	10	10	10	10	10	10	10	10	10	0	0	0	9
P04629	Q6ULP2	0	10	10	10	10	10	10	10	10	10	0	0	0	9
P04629	Q6UB35	0	10	10	10	10	10	10	10	10	10	0	0	0	9
P04629	Q6PKG0	0	10	10	10	10	10	10	10	10	10	0	0	0	9
P04629	Q6PJI9	0	10	10	10	10	10	10	10	10	10	0	0	0	9
P04629	Q6PJG6	0	10	10	10	10	10	10	10	10	10	0	0	0	9
P04629	Q6PIW4	0	10	10	10	10	10	10	10	10	10	0	0	0	9
P04629	Q6PI48	0	10	10	10	10	10	10	10	10	10	0	0	0	9
P04629	Q6PGP7	0	10	10	10	10	10	10	10	10	10	0	0	0	9
P04629	Q6PD62	0	10	10	10	10	10	10	10	10	10	0	0	0	9
P04629	Q6PCB5	0	10	10	10	10	10	10	10	10	10	0	0	0	9
P04629	Q6P9B9	0	10	10	10	10	10	10	10	10	10	0	0	0	9
P04629	Q6P996	0	10	10	10	10	10	10	10	10	10	0	0	0	9
P04629	Q6P3X3	0	10	10	10	10	10	10	10	10	10	0	0	0	9
P04629	Q6P3W7	0	10	10	10	10	10	10	10	10	10	0	0	0	9
P04629	Q6P2Q9	0	10	10	10	10	10	10	10	10	10	0	0	0	9
P04629	Q6P2E9	0	10	10	10	10	10	10	10	10	10	0	0	0	9
P04629	Q6P1M0	0	10	10	10	10	10	10	10	10	10	0	0	0	9
P04629	Q6P1J9	0	10	10	10	10	10	10	10	10	10	0	0	0	9
P04629	Q6P158	0	10	10	10	10	10	10	10	10	10	0	0	0	9
P04629	Q6NZY4	0	10	10	10	10	10	10	10	10	10	0	0	0	9
P04629	Q6NUQ1	0	10	10	10	10	10	10	10	10	10	0	0	0	9
P04629	Q6N069	0	10	10	10	10	10	10	10	10	10	0	0	0	9
P04629	Q6L8Q7	0	10	10	10	10	10	10	10	10	10	0	0	0	9
P04629	Q6IN85	0	10	10	10	10	10	10	10	10	10	0	0	0	9
P04629	Q6IBW4	0	10	10	10	10	10	10	10	10	10	0	0	0	9
P04629	Q6IA86	0	10	10	10	10	10	10	10	10	10	0	0	0	9
P04629	Q6DD88	0	10	10	10	10	10	10	10	10	10	0	0	0	9
P04629	Q6AI08	0	10	10	10	10	10	10	10	10	10	0	0	0	9
P04629	Q69YN4	0	10	10	10	10	10	10	10	10	10	0	0	0	9
P04629	Q68EM7	0	10	10	10	10	10	10	10	10	10	0	0	0	9
P04629	Q68E01	0	10	10	10	10	10	10	10	10	10	0	0	0	9
P04629	Q68CQ4	0	10	10	10	10	10	10	10	10	10	0	0	0	9
P04629	Q66K74	0	10	10	10	10	10	10	10	10	10	0	0	0	9
P04629	Q658Y4	0	10	10	10	10	10	10	10	10	10	0	0	0	9
P04629	Q63ZY3	0	10	10	10	10	10	10	10	10	10	0	0	0	9
P04629	Q5VZE5	0	10	10	10	10	10	10	10	10	10	0	0	0	9
P04629	Q5VWQ8	0	10	10	10	10	10	10	10	10	10	0	0	0	9
P04629	Q5VW36	0	10	10	10	10	10	10	10	10	10	0	0	0	9
P04629	Q5VUB5	0	10	10	10	10	10	10	10	10	10	0	0	0	9
P04629	Q5VTR2	0	10	10	10	10	10	10	10	10	10	0	0	0	9
P04629	Q5VT52	0	10	10	10	10	10	10	10	10	10	0	0	0	9
P04629	Q5VT25	0	10	10	10	10	10	10	10	10	10	0	0	0	9
P04629	Q5VSL9	0	10	10	10	10	10	10	10	10	10	0	0	0	9
P04629	Q5TCZ1	0	10	10	10	10	10	10	10	10	10	0	0	0	9
P04629	Q5T8P6	0	10	10	10	10	10	10	10	10	10	0	0	0	9
P04629	Q5T6V5	0	10	10	10	10	10	10	10	10	10	0	0	0	9
P04629	Q5T6F2	0	10	10	10	10	10	10	10	10	10	0	0	0	9
P04629	Q5T5Y3	0	10	10	10	10	10	10	10	10	10	0	0	0	9
P04629	Q5T5X7	0	10	10	10	10	10	10	10	10	10	0	0	0	9
P04629	Q5T447	0	10	10	10	10	10	10	10	10	10	0	0	0	9
P04629	Q5T160	0	10	10	10	10	10	10	10	10	10	0	0	0	9
P04629	Q5SY16	0	10	10	10	10	10	10	10	10	10	0	0	0	9
P04629	Q5SW79	0	10	10	10	10	10	10	10	10	10	0	0	0	9
P04629	Q5SSJ5	0	10	10	10	10	10	10	10	10	10	0	0	0	9
P04629	Q5SRE5	0	10	10	10	10	10	10	10	10	10	0	0	0	9
P04629	Q5MIZ7	0	10	10	10	10	10	10	10	10	10	0	0	0	9
P04629	Q5JTZ9	0	10	10	10	10	10	10	10	10	10	0	0	0	9
P04629	Q5JTH9	0	10	10	10	10	10	10	10	10	10	0	0	0	9
P04629	Q5JRA6	0	10	10	10	10	10	10	10	10	10	0	0	0	9
P04629	Q5JPH6	0	10	10	10	10	10	10	10	10	10	0	0	0	9
P04629	Q5H9R7	0	10	10	10	10	10	10	10	10	10	0	0	0	9
P04629	Q5GLZ8	0	10	10	10	10	10	10	10	10	10	0	0	0	9
P04629	Q5C9Z4	0	10	10	10	10	10	10	10	10	10	0	0	0	9
P04629	Q567U6	0	10	10	10	10	10	10	10	10	10	0	0	0	9
P04629	Q562E7	0	10	10	10	10	10	10	10	10	10	0	0	0	9
P04629	Q53H12	0	10	10	10	10	10	10	10	10	10	0	0	0	9
P04629	Q53GT1	0	10	10	10	10	10	10	10	10	10	0	0	0	9
P04629	Q53GS9	0	10	10	10	10	10	10	10	10	10	0	0	0	9
P04629	Q53GQ0	0	10	10	10	10	10	10	10	10	10	0	0	0	9
P04629	Q53EL6	0	10	10	10	10	10	10	10	10	10	0	0	0	9
P04629	Q52LJ0	0	10	10	10	10	10	10	10	10	10	0	0	0	9
P04629	Q4LE39	0	10	10	10	10	10	10	10	10	10	0	0	0	9
P04629	Q4KMP7	0	10	10	10	10	10	10	10	10	10	0	0	0	9
P04629	Q4G0J3	0	10	10	10	10	10	10	10	10	10	0	0	0	9
P04629	Q4G0F5	0	10	10	10	10	10	10	10	10	10	0	0	0	9
P04629	Q3YEC7	0	10	10	10	10	10	10	10	10	10	0	0	0	9
P04629	Q3V6T2	0	10	10	10	10	10	10	10	10	10	0	0	0	9
P04629	Q3SXM5	0	10	10	10	10	10	10	10	10	10	0	0	0	9
P04629	Q3KQU3	0	10	10	10	10	10	10	10	10	10	0	0	0	9
P04629	Q32P28	0	10	10	10	10	10	10	10	10	10	0	0	0	9
P04629	Q32MZ4	0	10	10	10	10	10	10	10	10	10	0	0	0	9
P04629	Q2TBE0	0	10	10	10	10	10	10	10	10	10	0	0	0	9
P04629	Q2TAL8	0	10	10	10	10	10	10	10	10	10	0	0	0	9
P04629	Q2NL82	0	10	10	10	10	10	10	10	10	10	0	0	0	9
P04629	Q2M389	0	10	10	10	10	10	10	10	10	10	0	0	0	9
P04629	Q2M2I8	0	10	10	10	10	10	10	10	10	10	0	0	0	9
P04629	Q2KJY2	0	10	10	10	10	10	10	10	10	10	0	0	0	9
P04629	Q29RF7	0	10	10	10	10	10	10	10	10	10	0	0	0	9
P04629	Q24JP5	0	10	10	10	10	10	10	10	10	10	0	0	0	9
P04629	Q1KMD3	0	10	10	10	10	10	10	10	10	10	0	0	0	9
P04629	Q16891	0	10	10	10	10	10	10	10	10	10	0	0	0	9
P04629	Q16881	0	10	10	10	10	10	10	10	10	10	0	0	0	9
P04629	Q16851	0	10	10	10	10	10	10	10	10	10	0	0	0	9
P04629	Q16832	0	10	10	10	10	10	10	10	10	10	0	0	0	9
P04629	Q16822	0	10	10	10	10	10	10	10	10	10	0	0	0	9
P04629	Q16795	0	10	10	10	10	10	10	10	10	10	0	0	0	9
P04629	Q16698	0	10	10	10	10	10	10	10	10	10	0	0	0	9
P04629	Q16658	0	10	10	10	10	10	10	10	10	10	0	0	0	9
P04629	Q16643	0	10	10	10	10	10	10	10	10	10	0	0	0	9
P04629	Q16630	0	10	10	10	10	10	10	10	10	10	0	0	0	9
P04629	Q16629	0	10	10	10	10	10	10	10	10	10	0	0	0	9
P04629	Q16555	0	10	10	10	10	10	10	10	10	10	0	0	0	9
P04629	Q16543	0	10	10	10	10	10	10	10	10	10	0	0	0	9
P04629	Q16531	0	10	10	10	10	10	10	10	10	10	0	0	0	9
P04629	Q16512	0	10	10	10	10	10	10	10	10	10	0	0	0	9
P04629	Q16288	0	10	10	10	10	10	10	10	10	10	0	0	0	9
P04629	Q16204	0	10	10	10	10	10	10	10	10	10	0	0	0	9
P04629	Q15813	0	10	10	10	10	10	10	10	10	10	0	0	0	9
P04629	Q15758	0	10	10	10	10	10	10	10	10	10	0	0	0	9
P04629	Q15717	0	10	10	10	10	10	10	10	10	10	0	0	0	9
P04629	Q15691	0	10	10	10	10	10	10	10	10	10	0	0	0	9
P04629	Q15650	0	10	10	10	10	10	10	10	10	10	0	0	0	9
P04629	Q15648	0	10	10	10	10	10	10	10	10	10	0	0	0	9
P04629	Q15645	0	10	10	10	10	10	10	10	10	10	0	0	0	9
P04629	Q15637	0	10	10	10	10	10	10	10	10	10	0	0	0	9
P04629	Q15477	0	10	10	10	10	10	10	10	10	10	0	0	0	9
P04629	Q15459	0	10	10	10	10	10	10	10	10	10	0	0	0	9
P04629	Q15437	0	10	10	10	10	10	10	10	10	10	0	0	0	9
P04629	Q15436	0	10	10	10	10	10	10	10	10	10	0	0	0	9
P04629	Q15424	0	10	10	10	10	10	10	10	10	10	0	0	0	9
P04629	Q15418	0	10	10	10	10	10	10	10	10	10	0	0	0	9
P04629	Q15417	0	10	10	10	10	10	10	10	10	10	0	0	0	9
P04629	Q15393	0	10	10	10	10	10	10	10	10	10	0	0	0	9
P04629	Q15386	0	10	10	10	10	10	10	10	10	10	0	0	0	9
P04629	Q15366	0	10	10	10	10	10	10	10	10	10	0	0	0	9
P04629	Q15365	0	10	10	10	10	10	10	10	10	10	0	0	0	9
P04629	Q15345	0	10	10	10	10	10	10	10	10	10	0	0	0	9
P04629	Q15334	0	10	10	10	10	10	10	10	10	10	0	0	0	9
P04629	Q15276	0	10	10	10	10	10	10	10	10	10	0	0	0	9
P04629	Q15233	0	10	10	10	10	10	10	10	10	10	0	0	0	9
P04629	Q15181	0	10	10	10	10	10	10	10	10	10	0	0	0	9
P04629	Q15155	0	10	10	10	10	10	10	10	10	10	0	0	0	9
P04629	Q15154	0	10	10	10	10	10	10	10	10	10	0	0	0	9
P04629	Q15102	0	10	10	10	10	10	10	10	10	10	0	0	0	9
P04629	Q15084	0	10	10	10	10	10	10	10	10	10	0	0	0	9
P04629	Q15059	0	10	10	10	10	10	10	10	10	10	0	0	0	9
P04629	Q15056	0	10	10	10	10	10	10	10	10	10	0	0	0	9
P04629	Q15046	0	10	10	10	10	10	10	10	10	10	0	0	0	9
P04629	Q15042	0	10	10	10	10	10	10	10	10	10	0	0	0	9
P04629	Q15036	0	10	10	10	10	10	10	10	10	10	0	0	0	9
P04629	Q15031	0	10	10	10	10	10	10	10	10	10	0	0	0	9
P04629	Q15029	0	10	10	10	10	10	10	10	10	10	0	0	0	9
P04629	Q15021	0	10	10	10	10	10	10	10	10	10	0	0	0	9
P04629	Q15020	0	10	10	10	10	10	10	10	10	10	0	0	0	9
P04629	Q15019	0	10	10	10	10	10	10	10	10	10	0	0	0	9
P04629	Q15008	0	10	10	10	10	10	10	10	10	10	0	0	0	9
P04629	Q15006	0	10	10	10	10	10	10	10	10	10	0	0	0	9
P04629	Q14CX7	0	10	10	10	10	10	10	10	10	10	0	0	0	9
P04629	Q14C86	0	10	10	10	10	10	10	10	10	10	0	0	0	9
P04629	Q14997	0	10	10	10	10	10	10	10	10	10	0	0	0	9
P04629	Q14980	0	10	10	10	10	10	10	10	10	10	0	0	0	9
P04629	Q14974	0	10	10	10	10	10	10	10	10	10	0	0	0	9
P04629	Q14839	0	10	10	10	10	10	10	10	10	10	0	0	0	9
P04629	Q14746	0	10	10	10	10	10	10	10	10	10	0	0	0	9
P04629	Q14739	0	10	10	10	10	10	10	10	10	10	0	0	0	9
P04629	Q14738	0	10	10	10	10	10	10	10	10	10	0	0	0	9
P04629	Q14697	0	10	10	10	10	10	10	10	10	10	0	0	0	9
P04629	Q14693	0	10	10	10	10	10	10	10	10	10	0	0	0	9
P04629	Q14690	0	10	10	10	10	10	10	10	10	10	0	0	0	9
P04629	Q14687	0	10	10	10	10	10	10	10	10	10	0	0	0	9
P04629	Q14684	0	10	10	10	10	10	10	10	10	10	0	0	0	9
P04629	Q14683	0	10	10	10	10	10	10	10	10	10	0	0	0	9
P04629	Q14677	0	10	10	10	10	10	10	10	10	10	0	0	0	9
P04629	Q14566	0	10	10	10	10	10	10	10	10	10	0	0	0	9
P04629	Q14562	0	10	10	10	10	10	10	10	10	10	0	0	0	9
P04629	Q14527	0	10	10	10	10	10	10	10	10	10	0	0	0	9
P04629	Q14498	0	10	10	10	10	10	10	10	10	10	0	0	0	9
P04629	Q14444	0	10	10	10	10	10	10	10	10	10	0	0	0	9
P04629	Q14344	0	10	10	10	10	10	10	10	10	10	0	0	0	9
P04629	Q14241	0	10	10	10	10	10	10	10	10	10	0	0	0	9
P04629	Q14232	0	10	10	10	10	10	10	10	10	10	0	0	0	9
P04629	Q14204	0	10	10	10	10	10	10	10	10	10	0	0	0	9
P04629	Q14203	0	10	10	10	10	10	10	10	10	10	0	0	0	9
P04629	Q14195	0	10	10	10	10	10	10	10	10	10	0	0	0	9
P04629	Q14191	0	10	10	10	10	10	10	10	10	10	0	0	0	9
P04629	Q14185	0	10	10	10	10	10	10	10	10	10	0	0	0	9
P04629	Q14166	0	10	10	10	10	10	10	10	10	10	0	0	0	9
P04629	Q14160	0	10	10	10	10	10	10	10	10	10	0	0	0	9
P04629	Q14157	0	10	10	10	10	10	10	10	10	10	0	0	0	9
P04629	Q14155	0	10	10	10	10	10	10	10	10	10	0	0	0	9
P04629	Q14152	0	10	10	10	10	10	10	10	10	10	0	0	0	9
P04629	Q14139	0	10	10	10	10	10	10	10	10	10	0	0	0	9
P04629	Q14137	0	10	10	10	10	10	10	10	10	10	0	0	0	9
P04629	Q14108	0	10	10	10	10	10	10	10	10	10	0	0	0	9
P04629	Q14103	0	10	10	10	10	10	10	10	10	10	0	0	0	9
P04629	Q14008	0	10	10	10	10	10	10	10	10	10	0	0	0	9
P04629	Q14004	0	10	10	10	10	10	10	10	10	10	0	0	0	9
P04629	Q13948	0	10	10	10	10	10	10	10	10	10	0	0	0	9
P04629	Q13838	0	10	10	10	10	10	10	10	10	10	0	0	0	9
P04629	Q13823	0	10	10	10	10	10	10	10	10	10	0	0	0	9
P04629	Q13813	0	10	10	10	10	10	10	10	10	10	0	0	0	9
P04629	Q13765	0	10	10	10	10	10	10	10	10	10	0	0	0	9
P04629	Q13740	0	10	10	10	10	10	10	10	10	10	0	0	0	9
P04629	Q13724	0	10	10	10	10	10	10	10	10	10	0	0	0	9
P04629	Q13627	0	10	10	10	10	10	10	10	10	10	0	0	0	9
P04629	Q13620	0	10	10	10	10	10	10	10	10	10	0	0	0	9
P04629	Q13618	0	10	10	10	10	10	10	10	10	10	0	0	0	9
P04629	Q13617	0	10	10	10	10	10	10	10	10	10	0	0	0	9
P04629	Q13616	0	10	10	10	10	10	10	10	10	10	0	0	0	9
P04629	Q13595	0	10	10	10	10	10	10	10	10	10	0	0	0	9
P04629	Q13573	0	10	10	10	10	10	10	10	10	10	0	0	0	9
P04629	Q13564	0	10	10	10	10	10	10	10	10	10	0	0	0	9
P04629	Q13561	0	10	10	10	10	10	10	10	10	10	0	0	0	9
P04629	Q13501	0	10	10	10	10	10	10	10	10	10	0	0	0	9
P04629	Q13492	0	10	10	10	10	10	10	10	10	10	0	0	0	9
P04629	Q13480	0	10	10	10	10	10	10	10	10	10	0	0	0	9
P04629	Q13472	0	10	10	10	10	10	10	10	10	10	0	0	0	9
P04629	Q13464	0	10	10	10	10	10	10	10	10	10	0	0	0	9
P04629	Q13459	0	10	10	10	10	10	10	10	10	10	0	0	0	9
P04629	Q13451	0	10	10	10	10	10	10	10	10	10	0	0	0	9
P04629	Q13435	0	10	10	10	10	10	10	10	10	10	0	0	0	9
P04629	Q13428	0	10	10	10	10	10	10	10	10	10	0	0	0	9
P04629	Q13423	0	10	10	10	10	10	10	10	10	10	0	0	0	9
P04629	Q13409	0	10	10	10	10	10	10	10	10	10	0	0	0	9
P04629	Q13363	0	10	10	10	10	10	10	10	10	10	0	0	0	9
P04629	Q13356	0	10	10	10	10	10	10	10	10	10	0	0	0	9
P04629	Q13347	0	10	10	10	10	10	10	10	10	10	0	0	0	9
P04629	Q13332	0	10	10	10	10	10	10	10	10	10	0	0	0	9
P04629	Q13330	0	10	10	10	10	10	10	10	10	10	0	0	0	9
P04629	Q13310	0	10	10	10	10	10	10	10	10	10	0	0	0	9
P04629	Q13308	0	10	10	10	10	10	10	10	10	10	0	0	0	9
P04629	Q13283	0	10	10	10	10	10	10	10	10	10	0	0	0	9
P04629	Q13263	0	10	10	10	10	10	10	10	10	10	0	0	0	9
P04629	Q13247	0	10	10	10	10	10	10	10	10	10	0	0	0	9
P04629	Q13243	0	10	10	10	10	10	10	10	10	10	0	0	0	9
P04629	Q13242	0	10	10	10	10	10	10	10	10	10	0	0	0	9
P04629	Q13233	0	10	10	10	10	10	10	10	10	10	0	0	0	9
P04629	Q13206	0	10	10	10	10	10	10	10	10	10	0	0	0	9
P04629	Q13200	0	10	10	10	10	10	10	10	10	10	0	0	0	9
P04629	Q13191	0	10	10	10	10	10	10	10	10	10	0	0	0	9
P04629	Q13177	0	10	10	10	10	10	10	10	10	10	0	0	0	9
P04629	Q13164	0	10	10	10	10	10	10	10	10	10	0	0	0	9
P04629	Q13162	0	10	10	10	10	10	10	10	10	10	0	0	0	9
P04629	Q13155	0	10	10	10	10	10	10	10	10	10	0	0	0	9
P04629	Q13151	0	10	10	10	10	10	10	10	10	10	0	0	0	9
P04629	Q13148	0	10	10	10	10	10	10	10	10	10	0	0	0	9
P04629	Q13136	0	10	10	10	10	10	10	10	10	10	0	0	0	9
P04629	Q13131	0	10	10	10	10	10	10	10	10	10	0	0	0	9
P04629	Q13123	0	10	10	10	10	10	10	10	10	10	0	0	0	9
P04629	Q13107	0	10	10	10	10	10	10	10	10	10	0	0	0	9
P04629	Q13098	0	10	10	10	10	10	10	10	10	10	0	0	0	9
P04629	Q13085	0	10	10	10	10	10	10	10	10	10	0	0	0	9
P04629	Q13084	0	10	10	10	10	10	10	10	10	10	0	0	0	9
P04629	Q13045	0	10	10	10	10	10	10	10	10	10	0	0	0	9
P04629	Q13033	0	10	10	10	10	10	10	10	10	10	0	0	0	9
P04629	Q13011	0	10	10	10	10	10	10	10	10	10	0	0	0	9
P04629	Q12996	0	10	10	10	10	10	10	10	10	10	0	0	0	9
P04629	Q12959	0	10	10	10	10	10	10	10	10	10	0	0	0	9
P04629	Q12931	0	10	10	10	10	10	10	10	10	10	0	0	0	9
P04629	Q12907	0	10	10	10	10	10	10	10	10	10	0	0	0	9
P04629	Q12906	0	10	10	10	10	10	10	10	10	10	0	0	0	9
P04629	Q12905	0	10	10	10	10	10	10	10	10	10	0	0	0	9
P04629	Q12904	0	10	10	10	10	10	10	10	10	10	0	0	0	9
P04629	Q12874	0	10	10	10	10	10	10	10	10	10	0	0	0	9
P04629	Q12872	0	10	10	10	10	10	10	10	10	10	0	0	0	9
P04629	Q12809	0	10	10	10	10	10	10	10	10	10	0	0	0	9
P04629	Q12792	0	10	10	10	10	10	10	10	10	10	0	0	0	9
P04629	Q12789	0	10	10	10	10	10	10	10	10	10	0	0	0	9
P04629	Q12788	0	10	10	10	10	10	10	10	10	10	0	0	0	9
P04629	Q12769	0	10	10	10	10	10	10	10	10	10	0	0	0	9
P04629	Q12768	0	10	10	10	10	10	10	10	10	10	0	0	0	9
P04629	Q12756	0	10	10	10	10	10	10	10	10	10	0	0	0	9
P04629	Q10570	0	10	10	10	10	10	10	10	10	10	0	0	0	9
P04629	Q10567	0	10	10	10	10	10	10	10	10	10	0	0	0	9
P04629	Q09161	0	10	10	10	10	10	10	10	10	10	0	0	0	9
P04629	Q09028	0	10	10	10	10	10	10	10	10	10	0	0	0	9
P04629	Q08J23	0	10	10	10	10	10	10	10	10	10	0	0	0	9
P04629	Q08AM6	0	10	10	10	10	10	10	10	10	10	0	0	0	9
P04629	Q08AD1	0	10	10	10	10	10	10	10	10	10	0	0	0	9
P04629	Q08945	0	10	10	10	10	10	10	10	10	10	0	0	0	9
P04629	Q08752	0	10	10	10	10	10	10	10	10	10	0	0	0	9
P04629	Q08426	0	10	10	10	10	10	10	10	10	10	0	0	0	9
P04629	Q08380	0	10	10	10	10	10	10	10	10	10	0	0	0	9
P04629	Q08379	0	10	10	10	10	10	10	10	10	10	0	0	0	9
P04629	Q08378	0	10	10	10	10	10	10	10	10	10	0	0	0	9
P04629	Q08211	0	10	10	10	10	10	10	10	10	10	0	0	0	9
P04629	Q07955	0	10	10	10	10	10	10	10	10	10	0	0	0	9
P04629	Q07912	0	10	10	10	10	10	10	10	10	10	0	0	0	9
P04629	Q07890	0	10	10	10	10	10	10	10	10	10	0	0	0	9
P04629	Q07889	0	10	10	10	10	10	10	10	10	10	0	0	0	9
P04629	Q07866	0	10	10	10	10	10	10	10	10	10	0	0	0	9
P04629	Q07864	0	10	10	10	10	10	10	10	10	10	0	0	0	9
P04629	Q07666	0	10	10	10	10	10	10	10	10	10	0	0	0	9
P04629	Q07343	0	10	10	10	10	10	10	10	10	10	0	0	0	9
P04629	Q07157	0	10	10	10	10	10	10	10	10	10	0	0	0	9
P04629	Q07065	0	10	10	10	10	10	10	10	10	10	0	0	0	9
P04629	Q07021	0	10	10	10	10	10	10	10	10	10	0	0	0	9
P04629	Q07020	0	10	10	10	10	10	10	10	10	10	0	0	0	9
P04629	Q06830	0	10	10	10	10	10	10	10	10	10	0	0	0	9
P04629	Q06787	0	10	10	10	10	10	10	10	10	10	0	0	0	9
P04629	Q06210	0	10	10	10	10	10	10	10	10	10	0	0	0	9
P04629	Q06203	0	10	10	10	10	10	10	10	10	10	0	0	0	9
P04629	Q06124	0	10	10	10	10	10	10	10	10	10	0	0	0	9
P04629	Q05682	0	10	10	10	10	10	10	10	10	10	0	0	0	9
P04629	Q05519	0	10	10	10	10	10	10	10	10	10	0	0	0	9
P04629	Q05397	0	10	10	10	10	10	10	10	10	10	0	0	0	9
P04629	Q05209	0	10	10	10	10	10	10	10	10	10	0	0	0	9
P04629	Q05193	0	10	10	10	10	10	10	10	10	10	0	0	0	9
P04629	Q05086	0	10	10	10	10	10	10	10	10	10	0	0	0	9
P04629	Q04917	0	10	10	10	10	10	10	10	10	10	0	0	0	9
P04629	Q04726	0	10	10	10	10	10	10	10	10	10	0	0	0	9
P04629	Q04656	0	10	10	10	10	10	10	10	10	10	0	0	0	9
P04629	Q04637	0	10	10	10	10	10	10	10	10	10	0	0	0	9
P04629	Q04206	0	10	10	10	10	10	10	10	10	10	0	0	0	9
P04629	Q03701	0	10	10	10	10	10	10	10	10	10	0	0	0	9
P04629	Q03135	0	10	10	10	10	10	10	10	10	10	0	0	0	9
P04629	Q02978	0	10	10	10	10	10	10	10	10	10	0	0	0	9
P04629	Q02880	0	10	10	10	10	10	10	10	10	10	0	0	0	9
P04629	Q02878	0	10	10	10	10	10	10	10	10	10	0	0	0	9
P04629	Q02809	0	10	10	10	10	10	10	10	10	10	0	0	0	9
P04629	Q02790	0	10	10	10	10	10	10	10	10	10	0	0	0	9
P04629	Q02218	0	10	10	10	10	10	10	10	10	10	0	0	0	9
P04629	Q01974	0	10	10	10	10	10	10	10	10	10	0	0	0	9
P04629	Q01968	0	10	10	10	10	10	10	10	10	10	0	0	0	9
P04629	Q01844	0	10	10	10	10	10	10	10	10	10	0	0	0	9
P04629	Q01813	0	10	10	10	10	10	10	10	10	10	0	0	0	9
P04629	Q01780	0	10	10	10	10	10	10	10	10	10	0	0	0	9
P04629	Q01518	0	10	10	10	10	10	10	10	10	10	0	0	0	9
P04629	Q01484	0	10	10	10	10	10	10	10	10	10	0	0	0	9
P04629	Q01433	0	10	10	10	10	10	10	10	10	10	0	0	0	9
P04629	Q01130	0	10	10	10	10	10	10	10	10	10	0	0	0	9
P04629	Q01105	0	10	10	10	10	10	10	10	10	10	0	0	0	9
P04629	Q01082	0	10	10	10	10	10	10	10	10	10	0	0	0	9
P04629	Q01081	0	10	10	10	10	10	10	10	10	10	0	0	0	9
P04629	Q00839	0	10	10	10	10	10	10	10	10	10	0	0	0	9
P04629	Q00796	0	10	10	10	10	10	10	10	10	10	0	0	0	9
P04629	Q00688	0	10	10	10	10	10	10	10	10	10	0	0	0	9
P04629	Q00610	0	10	10	10	10	10	10	10	10	10	0	0	0	9
P04629	Q00577	0	10	10	10	10	10	10	10	10	10	0	0	0	9
P04629	Q00535	0	10	10	10	10	10	10	10	10	10	0	0	0	9
P04629	Q00534	0	10	10	10	10	10	10	10	10	10	0	0	0	9
P04629	Q00341	0	10	10	10	10	10	10	10	10	10	0	0	0	9
P04629	Q00325	0	10	10	10	10	10	10	10	10	10	0	0	0	9
P04629	P98194	0	10	10	10	10	10	10	10	10	10	0	0	0	9
P04629	P85037	0	10	10	10	10	10	10	10	10	10	0	0	0	9
P04629	P84098	0	10	10	10	10	10	10	10	10	10	0	0	0	9
P04629	P83436	0	10	10	10	10	10	10	10	10	10	0	0	0	9
P04629	P82933	0	10	10	10	10	10	10	10	10	10	0	0	0	9
P04629	P82930	0	10	10	10	10	10	10	10	10	10	0	0	0	9
P04629	P82675	0	10	10	10	10	10	10	10	10	10	0	0	0	9
P04629	P82673	0	10	10	10	10	10	10	10	10	10	0	0	0	9
P04629	P82650	0	10	10	10	10	10	10	10	10	10	0	0	0	9
P04629	P78417	0	10	10	10	10	10	10	10	10	10	0	0	0	9
P04629	P78371	0	10	10	10	10	10	10	10	10	10	0	0	0	9
P04629	P78362	0	10	10	10	10	10	10	10	10	10	0	0	0	9
P04629	P78347	0	10	10	10	10	10	10	10	10	10	0	0	0	9
P04629	P78344	0	10	10	10	10	10	10	10	10	10	0	0	0	9
P04629	P68400	0	10	10	10	10	10	10	10	10	10	0	0	0	9
P04629	P68371	0	10	10	10	10	10	10	10	10	10	0	0	0	9
P04629	P68104	0	10	10	10	10	10	10	10	10	10	0	0	0	9
P04629	P67936	0	10	10	10	10	10	10	10	10	10	0	0	0	9
P04629	P67870	0	10	10	10	10	10	10	10	10	10	0	0	0	9
P04629	P67809	0	10	10	10	10	10	10	10	10	10	0	0	0	9
P04629	P67775	0	10	10	10	10	10	10	10	10	10	0	0	0	9
P04629	P63162	0	10	10	10	10	10	10	10	10	10	0	0	0	9
P04629	P63151	0	10	10	10	10	10	10	10	10	10	0	0	0	9
P04629	P63104	0	10	10	10	10	10	10	10	10	10	0	0	0	9
P04629	P63092	0	10	10	10	10	10	10	10	10	10	0	0	0	9
P04629	P63010	0	10	10	10	10	10	10	10	10	10	0	0	0	9
P04629	P62995	0	10	10	10	10	10	10	10	10	10	0	0	0	9
P04629	P62993	0	10	10	10	10	10	10	10	10	10	0	0	0	9
P04629	P62937	0	10	10	10	10	10	10	10	10	10	0	0	0	9
P04629	P62917	0	10	10	10	10	10	10	10	10	10	0	0	0	9
P04629	P62906	0	10	10	10	10	10	10	10	10	10	0	0	0	9
P04629	P62873	0	10	10	10	10	10	10	10	10	10	0	0	0	9
P04629	P62851	0	10	10	10	10	10	10	10	10	10	0	0	0	9
P04629	P62834	0	10	10	10	10	10	10	10	10	10	0	0	0	9
P04629	P62826	0	10	10	10	10	10	10	10	10	10	0	0	0	9
P04629	P62753	0	10	10	10	10	10	10	10	10	10	0	0	0	9
P04629	P62701	0	10	10	10	10	10	10	10	10	10	0	0	0	9
P04629	P62491	0	10	10	10	10	10	10	10	10	10	0	0	0	9
P04629	P62424	0	10	10	10	10	10	10	10	10	10	0	0	0	9
P04629	P62277	0	10	10	10	10	10	10	10	10	10	0	0	0	9
P04629	P62258	0	10	10	10	10	10	10	10	10	10	0	0	0	9
P04629	P62241	0	10	10	10	10	10	10	10	10	10	0	0	0	9
P04629	P62195	0	10	10	10	10	10	10	10	10	10	0	0	0	9
P04629	P62191	0	10	10	10	10	10	10	10	10	10	0	0	0	9
P04629	P62140	0	10	10	10	10	10	10	10	10	10	0	0	0	9
P04629	P62136	0	10	10	10	10	10	10	10	10	10	0	0	0	9
P04629	P61981	0	10	10	10	10	10	10	10	10	10	0	0	0	9
P04629	P61978	0	10	10	10	10	10	10	10	10	10	0	0	0	9
P04629	P61964	0	10	10	10	10	10	10	10	10	10	0	0	0	9
P04629	P61764	0	10	10	10	10	10	10	10	10	10	0	0	0	9
P04629	P61626	0	10	10	10	10	10	10	10	10	10	0	0	0	9
P04629	P61619	0	10	10	10	10	10	10	10	10	10	0	0	0	9
P04629	P61313	0	10	10	10	10	10	10	10	10	10	0	0	0	9
P04629	P61247	0	10	10	10	10	10	10	10	10	10	0	0	0	9
P04629	P61221	0	10	10	10	10	10	10	10	10	10	0	0	0	9
P04629	P61163	0	10	10	10	10	10	10	10	10	10	0	0	0	9
P04629	P61160	0	10	10	10	10	10	10	10	10	10	0	0	0	9
P04629	P61158	0	10	10	10	10	10	10	10	10	10	0	0	0	9
P04629	P61011	0	10	10	10	10	10	10	10	10	10	0	0	0	9
P04629	P60900	0	10	10	10	10	10	10	10	10	10	0	0	0	9
P04629	P60891	0	10	10	10	10	10	10	10	10	10	0	0	0	9
P04629	P60228	0	10	10	10	10	10	10	10	10	10	0	0	0	9
P04629	P60174	0	10	10	10	10	10	10	10	10	10	0	0	0	9
P04629	P57740	0	10	10	10	10	10	10	10	10	10	0	0	0	9
P04629	P57737	0	10	10	10	10	10	10	10	10	10	0	0	0	9
P04629	P57678	0	10	10	10	10	10	10	10	10	10	0	0	0	9
P04629	P57088	0	10	10	10	10	10	10	10	10	10	0	0	0	9
P04629	P56537	0	10	10	10	10	10	10	10	10	10	0	0	0	9
P04629	P56192	0	10	10	10	10	10	10	10	10	10	0	0	0	9
P04629	P55884	0	10	10	10	10	10	10	10	10	10	0	0	0	9
P04629	P55809	0	10	10	10	10	10	10	10	10	10	0	0	0	9
P04629	P55786	0	10	10	10	10	10	10	10	10	10	0	0	0	9
P04629	P55265	0	10	10	10	10	10	10	10	10	10	0	0	0	9
P04629	P55209	0	10	10	10	10	10	10	10	10	10	0	0	0	9
P04629	P55196	0	10	10	10	10	10	10	10	10	10	0	0	0	9
P04629	P55084	0	10	10	10	10	10	10	10	10	10	0	0	0	9
P04629	P55081	0	10	10	10	10	10	10	10	10	10	0	0	0	9
P04629	P55072	0	10	10	10	10	10	10	10	10	10	0	0	0	9
P04629	P55060	0	10	10	10	10	10	10	10	10	10	0	0	0	9
P04629	P55036	0	10	10	10	10	10	10	10	10	10	0	0	0	9
P04629	P55011	0	10	10	10	10	10	10	10	10	10	0	0	0	9
P04629	P55010	0	10	10	10	10	10	10	10	10	10	0	0	0	9
P04629	P54886	0	10	10	10	10	10	10	10	10	10	0	0	0	9
P04629	P54819	0	10	10	10	10	10	10	10	10	10	0	0	0	9
P04629	P54727	0	10	10	10	10	10	10	10	10	10	0	0	0	9
P04629	P54578	0	10	10	10	10	10	10	10	10	10	0	0	0	9
P04629	P54577	0	10	10	10	10	10	10	10	10	10	0	0	0	9
P04629	P54277	0	10	10	10	10	10	10	10	10	10	0	0	0	9
P04629	P54136	0	10	10	10	10	10	10	10	10	10	0	0	0	9
P04629	P54105	0	10	10	10	10	10	10	10	10	10	0	0	0	9
P04629	P53992	0	10	10	10	10	10	10	10	10	10	0	0	0	9
P04629	P53985	0	10	10	10	10	10	10	10	10	10	0	0	0	9
P04629	P53621	0	10	10	10	10	10	10	10	10	10	0	0	0	9
P04629	P53618	0	10	10	10	10	10	10	10	10	10	0	0	0	9
P04629	P53396	0	10	10	10	10	10	10	10	10	10	0	0	0	9
P04629	P53350	0	10	10	10	10	10	10	10	10	10	0	0	0	9
P04629	P53041	0	10	10	10	10	10	10	10	10	10	0	0	0	9
P04629	P53007	0	10	10	10	10	10	10	10	10	10	0	0	0	9
P04629	P53004	0	10	10	10	10	10	10	10	10	10	0	0	0	9
P04629	P52907	0	10	10	10	10	10	10	10	10	10	0	0	0	9
P04629	P52888	0	10	10	10	10	10	10	10	10	10	0	0	0	9
P04629	P52789	0	10	10	10	10	10	10	10	10	10	0	0	0	9
P04629	P52788	0	10	10	10	10	10	10	10	10	10	0	0	0	9
P04629	P52735	0	10	10	10	10	10	10	10	10	10	0	0	0	9
P04629	P52732	0	10	10	10	10	10	10	10	10	10	0	0	0	9
P04629	P52701	0	10	10	10	10	10	10	10	10	10	0	0	0	9
P04629	P52597	0	10	10	10	10	10	10	10	10	10	0	0	0	9
P04629	P52565	0	10	10	10	10	10	10	10	10	10	0	0	0	9
P04629	P52306	0	10	10	10	10	10	10	10	10	10	0	0	0	9
P04629	P52294	0	10	10	10	10	10	10	10	10	10	0	0	0	9
P04629	P52292	0	10	10	10	10	10	10	10	10	10	0	0	0	9
P04629	P52272	0	10	10	10	10	10	10	10	10	10	0	0	0	9
P04629	P51991	0	10	10	10	10	10	10	10	10	10	0	0	0	9
P04629	P51858	0	10	10	10	10	10	10	10	10	10	0	0	0	9
P04629	P51812	0	10	10	10	10	10	10	10	10	10	0	0	0	9
P04629	P51795	0	10	10	10	10	10	10	10	10	10	0	0	0	9
P04629	P51692	0	10	10	10	10	10	10	10	10	10	0	0	0	9
P04629	P51665	0	10	10	10	10	10	10	10	10	10	0	0	0	9
P04629	P51659	0	10	10	10	10	10	10	10	10	10	0	0	0	9
P04629	P51610	0	10	10	10	10	10	10	10	10	10	0	0	0	9
P04629	P51572	0	10	10	10	10	10	10	10	10	10	0	0	0	9
P04629	P51532	0	10	10	10	10	10	10	10	10	10	0	0	0	9
P04629	P51398	0	10	10	10	10	10	10	10	10	10	0	0	0	9
P04629	P51148	0	10	10	10	10	10	10	10	10	10	0	0	0	9
P04629	P51116	0	10	10	10	10	10	10	10	10	10	0	0	0	9
P04629	P51114	0	10	10	10	10	10	10	10	10	10	0	0	0	9
P04629	P51003	0	10	10	10	10	10	10	10	10	10	0	0	0	9
P04629	P50995	0	10	10	10	10	10	10	10	10	10	0	0	0	9
P04629	P50991	0	10	10	10	10	10	10	10	10	10	0	0	0	9
P04629	P50990	0	10	10	10	10	10	10	10	10	10	0	0	0	9
P04629	P50914	0	10	10	10	10	10	10	10	10	10	0	0	0	9
P04629	P50748	0	10	10	10	10	10	10	10	10	10	0	0	0	9
P04629	P50579	0	10	10	10	10	10	10	10	10	10	0	0	0	9
P04629	P50570	0	10	10	10	10	10	10	10	10	10	0	0	0	9
P04629	P50502	0	10	10	10	10	10	10	10	10	10	0	0	0	9
P04629	P50454	0	10	10	10	10	10	10	10	10	10	0	0	0	9
P04629	P50416	0	10	10	10	10	10	10	10	10	10	0	0	0	9
P04629	P50402	0	10	10	10	10	10	10	10	10	10	0	0	0	9
P04629	P49959	0	10	10	10	10	10	10	10	10	10	0	0	0	9
P04629	P49916	0	10	10	10	10	10	10	10	10	10	0	0	0	9
P04629	P49915	0	10	10	10	10	10	10	10	10	10	0	0	0	9
P04629	P49902	0	10	10	10	10	10	10	10	10	10	0	0	0	9
P04629	P49848	0	10	10	10	10	10	10	10	10	10	0	0	0	9
P04629	P49815	0	10	10	10	10	10	10	10	10	10	0	0	0	9
P04629	P49795	0	10	10	10	10	10	10	10	10	10	0	0	0	9
P04629	P49756	0	10	10	10	10	10	10	10	10	10	0	0	0	9
P04629	P49748	0	10	10	10	10	10	10	10	10	10	0	0	0	9
P04629	P49736	0	10	10	10	10	10	10	10	10	10	0	0	0	9
P04629	P49674	0	10	10	10	10	10	10	10	10	10	0	0	0	9
P04629	P49593	0	10	10	10	10	10	10	10	10	10	0	0	0	9
P04629	P49591	0	10	10	10	10	10	10	10	10	10	0	0	0	9
P04629	P49589	0	10	10	10	10	10	10	10	10	10	0	0	0	9
P04629	P49588	0	10	10	10	10	10	10	10	10	10	0	0	0	9
P04629	P49411	0	10	10	10	10	10	10	10	10	10	0	0	0	9
P04629	P49406	0	10	10	10	10	10	10	10	10	10	0	0	0	9
P04629	P49368	0	10	10	10	10	10	10	10	10	10	0	0	0	9
P04629	P49327	0	10	10	10	10	10	10	10	10	10	0	0	0	9
P04629	P49321	0	10	10	10	10	10	10	10	10	10	0	0	0	9
P04629	P49257	0	10	10	10	10	10	10	10	10	10	0	0	0	9
P04629	P49006	0	10	10	10	10	10	10	10	10	10	0	0	0	9
P04629	P48739	0	10	10	10	10	10	10	10	10	10	0	0	0	9
P04629	P48735	0	10	10	10	10	10	10	10	10	10	0	0	0	9
P04629	P48729	0	10	10	10	10	10	10	10	10	10	0	0	0	9
P04629	P48681	0	10	10	10	10	10	10	10	10	10	0	0	0	9
P04629	P48643	0	10	10	10	10	10	10	10	10	10	0	0	0	9
P04629	P48634	0	10	10	10	10	10	10	10	10	10	0	0	0	9
P04629	P48556	0	10	10	10	10	10	10	10	10	10	0	0	0	9
P04629	P48449	0	10	10	10	10	10	10	10	10	10	0	0	0	9
P04629	P48147	0	10	10	10	10	10	10	10	10	10	0	0	0	9
P04629	P47914	0	10	10	10	10	10	10	10	10	10	0	0	0	9
P04629	P47897	0	10	10	10	10	10	10	10	10	10	0	0	0	9
P04629	P47756	0	10	10	10	10	10	10	10	10	10	0	0	0	9
P04629	P46977	0	10	10	10	10	10	10	10	10	10	0	0	0	9
P04629	P46940	0	10	10	10	10	10	10	10	10	10	0	0	0	9
P04629	P46934	0	10	10	10	10	10	10	10	10	10	0	0	0	9
P04629	P46821	0	10	10	10	10	10	10	10	10	10	0	0	0	9
P04629	P46782	0	10	10	10	10	10	10	10	10	10	0	0	0	9
P04629	P46781	0	10	10	10	10	10	10	10	10	10	0	0	0	9
P04629	P46777	0	10	10	10	10	10	10	10	10	10	0	0	0	9
P04629	P46459	0	10	10	10	10	10	10	10	10	10	0	0	0	9
P04629	P46379	0	10	10	10	10	10	10	10	10	10	0	0	0	9
P04629	P46109	0	10	10	10	10	10	10	10	10	10	0	0	0	9
P04629	P46063	0	10	10	10	10	10	10	10	10	10	0	0	0	9
P04629	P46060	0	10	10	10	10	10	10	10	10	10	0	0	0	9
P04629	P45974	0	10	10	10	10	10	10	10	10	10	0	0	0	9
P04629	P45880	0	10	10	10	10	10	10	10	10	10	0	0	0	9
P04629	P43686	0	10	10	10	10	10	10	10	10	10	0	0	0	9
P04629	P43490	0	10	10	10	10	10	10	10	10	10	0	0	0	9
P04629	P43487	0	10	10	10	10	10	10	10	10	10	0	0	0	9
P04629	P43378	0	10	10	10	10	10	10	10	10	10	0	0	0	9
P04629	P43307	0	10	10	10	10	10	10	10	10	10	0	0	0	9
P04629	P43304	0	10	10	10	10	10	10	10	10	10	0	0	0	9
P04629	P43246	0	10	10	10	10	10	10	10	10	10	0	0	0	9
P04629	P43034	0	10	10	10	10	10	10	10	10	10	0	0	0	9
P04629	P42765	0	10	10	10	10	10	10	10	10	10	0	0	0	9
P04629	P42704	0	10	10	10	10	10	10	10	10	10	0	0	0	9
P04629	P42684	0	10	10	10	10	10	10	10	10	10	0	0	0	9
P04629	P42679	0	10	10	10	10	10	10	10	10	10	0	0	0	9
P04629	P42566	0	10	10	10	10	10	10	10	10	10	0	0	0	9
P04629	P42356	0	10	10	10	10	10	10	10	10	10	0	0	0	9
P04629	P42338	0	10	10	10	10	10	10	10	10	10	0	0	0	9
P04629	P42336	0	10	10	10	10	10	10	10	10	10	0	0	0	9
P04629	P42285	0	10	10	10	10	10	10	10	10	10	0	0	0	9
P04629	P42224	0	10	10	10	10	10	10	10	10	10	0	0	0	9
P04629	P42167	0	10	10	10	10	10	10	10	10	10	0	0	0	9
P04629	P42166	0	10	10	10	10	10	10	10	10	10	0	0	0	9
P04629	P41252	0	10	10	10	10	10	10	10	10	10	0	0	0	9
P04629	P41250	0	10	10	10	10	10	10	10	10	10	0	0	0	9
P04629	P41227	0	10	10	10	10	10	10	10	10	10	0	0	0	9
P04629	P41091	0	10	10	10	10	10	10	10	10	10	0	0	0	9
P04629	P40939	0	10	10	10	10	10	10	10	10	10	0	0	0	9
P04629	P40938	0	10	10	10	10	10	10	10	10	10	0	0	0	9
P04629	P40937	0	10	10	10	10	10	10	10	10	10	0	0	0	9
P04629	P40926	0	10	10	10	10	10	10	10	10	10	0	0	0	9
P04629	P40925	0	10	10	10	10	10	10	10	10	10	0	0	0	9
P04629	P40818	0	10	10	10	10	10	10	10	10	10	0	0	0	9
P04629	P40763	0	10	10	10	10	10	10	10	10	10	0	0	0	9
P04629	P40692	0	10	10	10	10	10	10	10	10	10	0	0	0	9
P04629	P40429	0	10	10	10	10	10	10	10	10	10	0	0	0	9
P04629	P40227	0	10	10	10	10	10	10	10	10	10	0	0	0	9
P04629	P40222	0	10	10	10	10	10	10	10	10	10	0	0	0	9
P04629	P39880	0	10	10	10	10	10	10	10	10	10	0	0	0	9
P04629	P39748	0	10	10	10	10	10	10	10	10	10	0	0	0	9
P04629	P39687	0	10	10	10	10	10	10	10	10	10	0	0	0	9
P04629	P39656	0	10	10	10	10	10	10	10	10	10	0	0	0	9
P04629	P38919	0	10	10	10	10	10	10	10	10	10	0	0	0	9
P04629	P38646	0	10	10	10	10	10	10	10	10	10	0	0	0	9
P04629	P38606	0	10	10	10	10	10	10	10	10	10	0	0	0	9
P04629	P38159	0	10	10	10	10	10	10	10	10	10	0	0	0	9
P04629	P38117	0	10	10	10	10	10	10	10	10	10	0	0	0	9
P04629	P37837	0	10	10	10	10	10	10	10	10	10	0	0	0	9
P04629	P36915	0	10	10	10	10	10	10	10	10	10	0	0	0	9
P04629	P36896	0	10	10	10	10	10	10	10	10	10	0	0	0	9
P04629	P36871	0	10	10	10	10	10	10	10	10	10	0	0	0	9
P04629	P36776	0	10	10	10	10	10	10	10	10	10	0	0	0	9
P04629	P36578	0	10	10	10	10	10	10	10	10	10	0	0	0	9
P04629	P36542	0	10	10	10	10	10	10	10	10	10	0	0	0	9
P04629	P35998	0	10	10	10	10	10	10	10	10	10	0	0	0	9
P04629	P35658	0	10	10	10	10	10	10	10	10	10	0	0	0	9
P04629	P35637	0	10	10	10	10	10	10	10	10	10	0	0	0	9
P04629	P35626	0	10	10	10	10	10	10	10	10	10	0	0	0	9
P04629	P35613	0	10	10	10	10	10	10	10	10	10	0	0	0	9
P04629	P35606	0	10	10	10	10	10	10	10	10	10	0	0	0	9
P04629	P35580	0	10	10	10	10	10	10	10	10	10	0	0	0	9
P04629	P35579	0	10	10	10	10	10	10	10	10	10	0	0	0	9
P04629	P35573	0	10	10	10	10	10	10	10	10	10	0	0	0	9
P04629	P35520	0	10	10	10	10	10	10	10	10	10	0	0	0	9
P04629	P35269	0	10	10	10	10	10	10	10	10	10	0	0	0	9
P04629	P35251	0	10	10	10	10	10	10	10	10	10	0	0	0	9
P04629	P35249	0	10	10	10	10	10	10	10	10	10	0	0	0	9
P04629	P35241	0	10	10	10	10	10	10	10	10	10	0	0	0	9
P04629	P35237	0	10	10	10	10	10	10	10	10	10	0	0	0	9
P04629	P35232	0	10	10	10	10	10	10	10	10	10	0	0	0	9
P04629	P35222	0	10	10	10	10	10	10	10	10	10	0	0	0	9
P04629	P35221	0	10	10	10	10	10	10	10	10	10	0	0	0	9
P04629	P34932	0	10	10	10	10	10	10	10	10	10	0	0	0	9
P04629	P34897	0	10	10	10	10	10	10	10	10	10	0	0	0	9
P04629	P33993	0	10	10	10	10	10	10	10	10	10	0	0	0	9
P04629	P33992	0	10	10	10	10	10	10	10	10	10	0	0	0	9
P04629	P33991	0	10	10	10	10	10	10	10	10	10	0	0	0	9
P04629	P33897	0	10	10	10	10	10	10	10	10	10	0	0	0	9
P04629	P33527	0	10	10	10	10	10	10	10	10	10	0	0	0	9
P04629	P33176	0	10	10	10	10	10	10	10	10	10	0	0	0	9
P04629	P33121	0	10	10	10	10	10	10	10	10	10	0	0	0	9
P04629	P32969	0	10	10	10	10	10	10	10	10	10	0	0	0	9
P04629	P32322	0	10	10	10	10	10	10	10	10	10	0	0	0	9
P04629	P32004	0	10	10	10	10	10	10	10	10	10	0	0	0	9
P04629	P31948	0	10	10	10	10	10	10	10	10	10	0	0	0	9
P04629	P31947	0	10	10	10	10	10	10	10	10	10	0	0	0	9
P04629	P31946	0	10	10	10	10	10	10	10	10	10	0	0	0	9
P04629	P31943	0	10	10	10	10	10	10	10	10	10	0	0	0	9
P04629	P31942	0	10	10	10	10	10	10	10	10	10	0	0	0	9
P04629	P31939	0	10	10	10	10	10	10	10	10	10	0	0	0	9
P04629	P31930	0	10	10	10	10	10	10	10	10	10	0	0	0	9
P04629	P31689	0	10	10	10	10	10	10	10	10	10	0	0	0	9
P04629	P31483	0	10	10	10	10	10	10	10	10	10	0	0	0	9
P04629	P31153	0	10	10	10	10	10	10	10	10	10	0	0	0	9
P04629	P31150	0	10	10	10	10	10	10	10	10	10	0	0	0	9
P04629	P31040	0	10	10	10	10	10	10	10	10	10	0	0	0	9
P04629	P30876	0	10	10	10	10	10	10	10	10	10	0	0	0	9
P04629	P30837	0	10	10	10	10	10	10	10	10	10	0	0	0	9
P04629	P30566	0	10	10	10	10	10	10	10	10	10	0	0	0	9
P04629	P30419	0	10	10	10	10	10	10	10	10	10	0	0	0	9
P04629	P30260	0	10	10	10	10	10	10	10	10	10	0	0	0	9
P04629	P30153	0	10	10	10	10	10	10	10	10	10	0	0	0	9
P04629	P30101	0	10	10	10	10	10	10	10	10	10	0	0	0	9
P04629	P30084	0	10	10	10	10	10	10	10	10	10	0	0	0	9
P04629	P30041	0	10	10	10	10	10	10	10	10	10	0	0	0	9
P04629	P30040	0	10	10	10	10	10	10	10	10	10	0	0	0	9
P04629	P29966	0	10	10	10	10	10	10	10	10	10	0	0	0	9
P04629	P29692	0	10	10	10	10	10	10	10	10	10	0	0	0	9
P04629	P29590	0	10	10	10	10	10	10	10	10	10	0	0	0	9
P04629	P29401	0	10	10	10	10	10	10	10	10	10	0	0	0	9
P04629	P29353	0	10	10	10	10	10	10	10	10	10	0	0	0	9
P04629	P29317	0	10	10	10	10	10	10	10	10	10	0	0	0	9
P04629	P29218	0	10	10	10	10	10	10	10	10	10	0	0	0	9
P04629	P28838	0	10	10	10	10	10	10	10	10	10	0	0	0	9
P04629	P28799	0	10	10	10	10	10	10	10	10	10	0	0	0	9
P04629	P28749	0	10	10	10	10	10	10	10	10	10	0	0	0	9
P04629	P28482	0	10	10	10	10	10	10	10	10	10	0	0	0	9
P04629	P28370	0	10	10	10	10	10	10	10	10	10	0	0	0	9
P04629	P28340	0	10	10	10	10	10	10	10	10	10	0	0	0	9
P04629	P28331	0	10	10	10	10	10	10	10	10	10	0	0	0	9
P04629	P28289	0	10	10	10	10	10	10	10	10	10	0	0	0	9
P04629	P28288	0	10	10	10	10	10	10	10	10	10	0	0	0	9
P04629	P28066	0	10	10	10	10	10	10	10	10	10	0	0	0	9
P04629	P27986	0	10	10	10	10	10	10	10	10	10	0	0	0	9
P04629	P27824	0	10	10	10	10	10	10	10	10	10	0	0	0	9
P04629	P27816	0	10	10	10	10	10	10	10	10	10	0	0	0	9
P04629	P27797	0	10	10	10	10	10	10	10	10	10	0	0	0	9
P04629	P27708	0	10	10	10	10	10	10	10	10	10	0	0	0	9
P04629	P27707	0	10	10	10	10	10	10	10	10	10	0	0	0	9
P04629	P27695	0	10	10	10	10	10	10	10	10	10	0	0	0	9
P04629	P27694	0	10	10	10	10	10	10	10	10	10	0	0	0	9
P04629	P27635	0	10	10	10	10	10	10	10	10	10	0	0	0	9
P04629	P27448	0	10	10	10	10	10	10	10	10	10	0	0	0	9
P04629	P27348	0	10	10	10	10	10	10	10	10	10	0	0	0	9
P04629	P26640	0	10	10	10	10	10	10	10	10	10	0	0	0	9
P04629	P26639	0	10	10	10	10	10	10	10	10	10	0	0	0	9
P04629	P26599	0	10	10	10	10	10	10	10	10	10	0	0	0	9
P04629	P26583	0	10	10	10	10	10	10	10	10	10	0	0	0	9
P04629	P26373	0	10	10	10	10	10	10	10	10	10	0	0	0	9
P04629	P26368	0	10	10	10	10	10	10	10	10	10	0	0	0	9
P04629	P26358	0	10	10	10	10	10	10	10	10	10	0	0	0	9
P04629	P26196	0	10	10	10	10	10	10	10	10	10	0	0	0	9
P04629	P25789	0	10	10	10	10	10	10	10	10	10	0	0	0	9
P04629	P25788	0	10	10	10	10	10	10	10	10	10	0	0	0	9
P04629	P25787	0	10	10	10	10	10	10	10	10	10	0	0	0	9
P04629	P25786	0	10	10	10	10	10	10	10	10	10	0	0	0	9
P04629	P25705	0	10	10	10	10	10	10	10	10	10	0	0	0	9
P04629	P25685	0	10	10	10	10	10	10	10	10	10	0	0	0	9
P04629	P24941	0	10	10	10	10	10	10	10	10	10	0	0	0	9
P04629	P24928	0	10	10	10	10	10	10	10	10	10	0	0	0	9
P04629	P24752	0	10	10	10	10	10	10	10	10	10	0	0	0	9
P04629	P24534	0	10	10	10	10	10	10	10	10	10	0	0	0	9
P04629	P23588	0	10	10	10	10	10	10	10	10	10	0	0	0	9
P04629	P23528	0	10	10	10	10	10	10	10	10	10	0	0	0	9
P04629	P23526	0	10	10	10	10	10	10	10	10	10	0	0	0	9
P04629	P23458	0	10	10	10	10	10	10	10	10	10	0	0	0	9
P04629	P23396	0	10	10	10	10	10	10	10	10	10	0	0	0	9
P04629	P23381	0	10	10	10	10	10	10	10	10	10	0	0	0	9
P04629	P23378	0	10	10	10	10	10	10	10	10	10	0	0	0	9
P04629	P23368	0	10	10	10	10	10	10	10	10	10	0	0	0	9
P04629	P23284	0	10	10	10	10	10	10	10	10	10	0	0	0	9
P04629	P23258	0	10	10	10	10	10	10	10	10	10	0	0	0	9
P04629	P23246	0	10	10	10	10	10	10	10	10	10	0	0	0	9
P04629	P22735	0	10	10	10	10	10	10	10	10	10	0	0	0	9
P04629	P22695	0	10	10	10	10	10	10	10	10	10	0	0	0	9
P04629	P22694	0	10	10	10	10	10	10	10	10	10	0	0	0	9
P04629	P22681	0	10	10	10	10	10	10	10	10	10	0	0	0	9
P04629	P22626	0	10	10	10	10	10	10	10	10	10	0	0	0	9
P04629	P22314	0	10	10	10	10	10	10	10	10	10	0	0	0	9
P04629	P22234	0	10	10	10	10	10	10	10	10	10	0	0	0	9
P04629	P22102	0	10	10	10	10	10	10	10	10	10	0	0	0	9
P04629	P22087	0	10	10	10	10	10	10	10	10	10	0	0	0	9
P04629	P22061	0	10	10	10	10	10	10	10	10	10	0	0	0	9
P04629	P22059	0	10	10	10	10	10	10	10	10	10	0	0	0	9
P04629	P22033	0	10	10	10	10	10	10	10	10	10	0	0	0	9
P04629	P21796	0	10	10	10	10	10	10	10	10	10	0	0	0	9
P04629	P21579	0	10	10	10	10	10	10	10	10	10	0	0	0	9
P04629	P21399	0	10	10	10	10	10	10	10	10	10	0	0	0	9
P04629	P21333	0	10	10	10	10	10	10	10	10	10	0	0	0	9
P04629	P21281	0	10	10	10	10	10	10	10	10	10	0	0	0	9
P04629	P20936	0	10	10	10	10	10	10	10	10	10	0	0	0	9
P04629	P20839	0	10	10	10	10	10	10	10	10	10	0	0	0	9
P04629	P20783	0	10	10	10	10	10	10	10	10	10	0	0	0	9
P04629	P20700	0	10	10	10	10	10	10	10	10	10	0	0	0	9
P04629	P20585	0	10	10	10	10	10	10	10	10	10	0	0	0	9
P04629	P20042	0	10	10	10	10	10	10	10	10	10	0	0	0	9
P04629	P20020	0	10	10	10	10	10	10	10	10	10	0	0	0	9
P04629	P19784	0	10	10	10	10	10	10	10	10	10	0	0	0	9
P04629	P19623	0	10	10	10	10	10	10	10	10	10	0	0	0	9
P04629	P19525	0	10	10	10	10	10	10	10	10	10	0	0	0	9
P04629	P19367	0	10	10	10	10	10	10	10	10	10	0	0	0	9
P04629	P19338	0	10	10	10	10	10	10	10	10	10	0	0	0	9
P04629	P19174	0	10	10	10	10	10	10	10	10	10	0	0	0	9
P04629	P19022	0	10	10	10	10	10	10	10	10	10	0	0	0	9
P04629	P18887	0	10	10	10	10	10	10	10	10	10	0	0	0	9
P04629	P18858	0	10	10	10	10	10	10	10	10	10	0	0	0	9
P04629	P18669	0	10	10	10	10	10	10	10	10	10	0	0	0	9
P04629	P18621	0	10	10	10	10	10	10	10	10	10	0	0	0	9
P04629	P18615	0	10	10	10	10	10	10	10	10	10	0	0	0	9
P04629	P18206	0	10	10	10	10	10	10	10	10	10	0	0	0	9
P04629	P18124	0	10	10	10	10	10	10	10	10	10	0	0	0	9
P04629	P18074	0	10	10	10	10	10	10	10	10	10	0	0	0	9
P04629	P18031	0	10	10	10	10	10	10	10	10	10	0	0	0	9
P04629	P17987	0	10	10	10	10	10	10	10	10	10	0	0	0	9
P04629	P17980	0	10	10	10	10	10	10	10	10	10	0	0	0	9
P04629	P17858	0	10	10	10	10	10	10	10	10	10	0	0	0	9
P04629	P17844	0	10	10	10	10	10	10	10	10	10	0	0	0	9
P04629	P17812	0	10	10	10	10	10	10	10	10	10	0	0	0	9
P04629	P17655	0	10	10	10	10	10	10	10	10	10	0	0	0	9
P04629	P17480	0	10	10	10	10	10	10	10	10	10	0	0	0	9
P04629	P17252	0	10	10	10	10	10	10	10	10	10	0	0	0	9
P04629	P17066	0	10	10	10	10	10	10	10	10	10	0	0	0	9
P04629	P17029	0	10	10	10	10	10	10	10	10	10	0	0	0	9
P04629	P16615	0	10	10	10	10	10	10	10	10	10	0	0	0	9
P04629	P16435	0	10	10	10	10	10	10	10	10	10	0	0	0	9
P04629	P16403	0	10	10	10	10	10	10	10	10	10	0	0	0	9
P04629	P16234	0	10	10	10	10	10	10	10	10	10	0	0	0	9
P04629	P16188	0	10	10	10	10	10	10	10	10	10	0	0	0	9
P04629	P16152	0	10	10	10	10	10	10	10	10	10	0	0	0	9
P04629	P15924	0	10	10	10	10	10	10	10	10	10	0	0	0	9
P04629	P15884	0	10	10	10	10	10	10	10	10	10	0	0	0	9
P04629	P15880	0	10	10	10	10	10	10	10	10	10	0	0	0	9
P04629	P15311	0	10	10	10	10	10	10	10	10	10	0	0	0	9
P04629	P15170	0	10	10	10	10	10	10	10	10	10	0	0	0	9
P04629	P15121	0	10	10	10	10	10	10	10	10	10	0	0	0	9
P04629	P14923	0	10	10	10	10	10	10	10	10	10	0	0	0	9
P04629	P14868	0	10	10	10	10	10	10	10	10	10	0	0	0	9
P04629	P14735	0	10	10	10	10	10	10	10	10	10	0	0	0	9
P04629	P14625	0	10	10	10	10	10	10	10	10	10	0	0	0	9
P04629	P14618	0	10	10	10	10	10	10	10	10	10	0	0	0	9
P04629	P14324	0	10	10	10	10	10	10	10	10	10	0	0	0	9
P04629	P14314	0	10	10	10	10	10	10	10	10	10	0	0	0	9
P04629	P13984	0	10	10	10	10	10	10	10	10	10	0	0	0	9
P04629	P13807	0	10	10	10	10	10	10	10	10	10	0	0	0	9
P04629	P13804	0	10	10	10	10	10	10	10	10	10	0	0	0	9
P04629	P13798	0	10	10	10	10	10	10	10	10	10	0	0	0	9
P04629	P13797	0	10	10	10	10	10	10	10	10	10	0	0	0	9
P04629	P13746	0	10	10	10	10	10	10	10	10	10	0	0	0	9
P04629	P13667	0	10	10	10	10	10	10	10	10	10	0	0	0	9
P04629	P13639	0	10	10	10	10	10	10	10	10	10	0	0	0	9
P04629	P13489	0	10	10	10	10	10	10	10	10	10	0	0	0	9
P04629	P13010	0	10	10	10	10	10	10	10	10	10	0	0	0	9
P04629	P12956	0	10	10	10	10	10	10	10	10	10	0	0	0	9
P04629	P12931	0	10	10	10	10	10	10	10	10	10	0	0	0	9
P04629	P12814	0	10	10	10	10	10	10	10	10	10	0	0	0	9
P04629	P12532	0	10	10	10	10	10	10	10	10	10	0	0	0	9
P04629	P12277	0	10	10	10	10	10	10	10	10	10	0	0	0	9
P04629	P12270	0	10	10	10	10	10	10	10	10	10	0	0	0	9
P04629	P12268	0	10	10	10	10	10	10	10	10	10	0	0	0	9
P04629	P12236	0	10	10	10	10	10	10	10	10	10	0	0	0	9
P04629	P12081	0	10	10	10	10	10	10	10	10	10	0	0	0	9
P04629	P12004	0	10	10	10	10	10	10	10	10	10	0	0	0	9
P04629	P11940	0	10	10	10	10	10	10	10	10	10	0	0	0	9
P04629	P11802	0	10	10	10	10	10	10	10	10	10	0	0	0	9
P04629	P11498	0	10	10	10	10	10	10	10	10	10	0	0	0	9
P04629	P11413	0	10	10	10	10	10	10	10	10	10	0	0	0	9
P04629	P11387	0	10	10	10	10	10	10	10	10	10	0	0	0	9
P04629	P11310	0	10	10	10	10	10	10	10	10	10	0	0	0	9
P04629	P11274	0	10	10	10	10	10	10	10	10	10	0	0	0	9
P04629	P11233	0	10	10	10	10	10	10	10	10	10	0	0	0	9
P04629	P11216	0	10	10	10	10	10	10	10	10	10	0	0	0	9
P04629	P11177	0	10	10	10	10	10	10	10	10	10	0	0	0	9
P04629	P11171	0	10	10	10	10	10	10	10	10	10	0	0	0	9
P04629	P11142	0	10	10	10	10	10	10	10	10	10	0	0	0	9
P04629	P11137	0	10	10	10	10	10	10	10	10	10	0	0	0	9
P04629	P11021	0	10	10	10	10	10	10	10	10	10	0	0	0	9
P04629	P10809	0	10	10	10	10	10	10	10	10	10	0	0	0	9
P04629	P10768	0	10	10	10	10	10	10	10	10	10	0	0	0	9
P04629	P10643	0	10	10	10	10	10	10	10	10	10	0	0	0	9
P04629	P10599	0	10	10	10	10	10	10	10	10	10	0	0	0	9
P04629	P10586	0	10	10	10	10	10	10	10	10	10	0	0	0	9
P04629	P10515	0	10	10	10	10	10	10	10	10	10	0	0	0	9
P04629	P10253	0	10	10	10	10	10	10	10	10	10	0	0	0	9
P04629	P10155	0	10	10	10	10	10	10	10	10	10	0	0	0	9
P04629	P0CG48	0	10	10	10	10	10	10	10	10	10	0	0	0	9
P04629	P0C7T5	0	10	10	10	10	10	10	10	10	10	0	0	0	9
P04629	P09972	0	10	10	10	10	10	10	10	10	10	0	0	0	9
P04629	P09960	0	10	10	10	10	10	10	10	10	10	0	0	0	9
P04629	P09884	0	10	10	10	10	10	10	10	10	10	0	0	0	9
P04629	P09874	0	10	10	10	10	10	10	10	10	10	0	0	0	9
P04629	P09651	0	10	10	10	10	10	10	10	10	10	0	0	0	9
P04629	P09622	0	10	10	10	10	10	10	10	10	10	0	0	0	9
P04629	P09619	0	10	10	10	10	10	10	10	10	10	0	0	0	9
P04629	P09543	0	10	10	10	10	10	10	10	10	10	0	0	0	9
P04629	P09496	0	10	10	10	10	10	10	10	10	10	0	0	0	9
P04629	P09471	0	10	10	10	10	10	10	10	10	10	0	0	0	9
P04629	P09429	0	10	10	10	10	10	10	10	10	10	0	0	0	9
P04629	P09211	0	10	10	10	10	10	10	10	10	10	0	0	0	9
P04629	P09104	0	10	10	10	10	10	10	10	10	10	0	0	0	9
P04629	P09012	0	10	10	10	10	10	10	10	10	10	0	0	0	9
P04629	P09001	0	10	10	10	10	10	10	10	10	10	0	0	0	9
P04629	P08865	0	10	10	10	10	10	10	10	10	10	0	0	0	9
P04629	P08758	0	10	10	10	10	10	10	10	10	10	0	0	0	9
P04629	P08754	0	10	10	10	10	10	10	10	10	10	0	0	0	9
P04629	P08574	0	10	10	10	10	10	10	10	10	10	0	0	0	9
P04629	P08559	0	10	10	10	10	10	10	10	10	10	0	0	0	9
P04629	P08243	0	10	10	10	10	10	10	10	10	10	0	0	0	9
P04629	P08240	0	10	10	10	10	10	10	10	10	10	0	0	0	9
P04629	P08238	0	10	10	10	10	10	10	10	10	10	0	0	0	9
P04629	P08237	0	10	10	10	10	10	10	10	10	10	0	0	0	9
P04629	P08195	0	10	10	10	10	10	10	10	10	10	0	0	0	9
P04629	P08183	0	10	10	10	10	10	10	10	10	10	0	0	0	9
P04629	P08138	0	10	10	10	10	10	10	10	10	10	0	0	0	9
P04629	P08133	0	10	10	10	10	10	10	10	10	10	0	0	0	9
P04629	P08069	0	10	10	10	10	10	10	10	10	10	0	0	0	9
P04629	P07949	0	10	10	10	10	10	10	10	10	10	0	0	0	9
P04629	P07948	0	10	10	10	10	10	10	10	10	10	0	0	0	9
P04629	P07942	0	10	10	10	10	10	10	10	10	10	0	0	0	9
P04629	P07910	0	10	10	10	10	10	10	10	10	10	0	0	0	9
P04629	P07900	0	10	10	10	10	10	10	10	10	10	0	0	0	9
P04629	P07814	0	10	10	10	10	10	10	10	10	10	0	0	0	9
P04629	P07737	0	10	10	10	10	10	10	10	10	10	0	0	0	9
P04629	P07437	0	10	10	10	10	10	10	10	10	10	0	0	0	9
P04629	P07384	0	10	10	10	10	10	10	10	10	10	0	0	0	9
P04629	P07355	0	10	10	10	10	10	10	10	10	10	0	0	0	9
P04629	P07237	0	10	10	10	10	10	10	10	10	10	0	0	0	9
P04629	P07195	0	10	10	10	10	10	10	10	10	10	0	0	0	9
P04629	P06756	0	10	10	10	10	10	10	10	10	10	0	0	0	9
P04629	P06753	0	10	10	10	10	10	10	10	10	10	0	0	0	9
P04629	P06748	0	10	10	10	10	10	10	10	10	10	0	0	0	9
P04629	P06744	0	10	10	10	10	10	10	10	10	10	0	0	0	9
P04629	P06733	0	10	10	10	10	10	10	10	10	10	0	0	0	9
P04629	P06730	0	10	10	10	10	10	10	10	10	10	0	0	0	9
P04629	P06702	0	10	10	10	10	10	10	10	10	10	0	0	0	9
P04629	P06576	0	10	10	10	10	10	10	10	10	10	0	0	0	9
P04629	P06493	0	10	10	10	10	10	10	10	10	10	0	0	0	9
P04629	P06400	0	10	10	10	10	10	10	10	10	10	0	0	0	9
P04629	P06213	0	10	10	10	10	10	10	10	10	10	0	0	0	9
P04629	P05556	0	10	10	10	10	10	10	10	10	10	0	0	0	9
P04629	P05455	0	10	10	10	10	10	10	10	10	10	0	0	0	9
P04629	P05413	0	10	10	10	10	10	10	10	10	10	0	0	0	9
P04629	P05388	0	10	10	10	10	10	10	10	10	10	0	0	0	9
P04629	P05198	0	10	10	10	10	10	10	10	10	10	0	0	0	9
P04629	P05141	0	10	10	10	10	10	10	10	10	10	0	0	0	9
P04629	P05091	0	10	10	10	10	10	10	10	10	10	0	0	0	9
P04629	P05026	0	10	10	10	10	10	10	10	10	10	0	0	0	9
P04629	P05023	0	10	10	10	10	10	10	10	10	10	0	0	0	9
P04629	P04844	0	10	10	10	10	10	10	10	10	10	0	0	0	9
P04629	P04843	0	10	10	10	10	10	10	10	10	10	0	0	0	9
P04629	P04792	0	10	10	10	10	10	10	10	10	10	0	0	0	9
P04439	P04629	0	10	10	10	10	10	10	10	10	10	0	0	0	9
P04406	Q99972	10	10	10	10	10	0	10	10	10	10	0	0	0	9
P04406	P04629	0	10	10	10	10	10	10	10	10	10	0	0	0	9
P04181	P04629	0	10	10	10	10	10	10	10	10	10	0	0	0	9
P04075	Q99972	10	10	10	10	10	0	10	10	10	10	0	0	0	9
P04075	P04629	0	10	10	10	10	10	10	10	10	10	0	0	0	9
P04062	P04629	0	10	10	10	10	10	10	10	10	10	0	0	0	9
P04040	P04629	0	10	10	10	10	10	10	10	10	10	0	0	0	9
P03950	P13385	0	10	0	10	10	0	10	10	10	10	10	0	10	9
P02792	Q99972	10	10	10	10	10	0	10	10	10	10	0	0	0	9
P02788	P04629	0	10	10	10	10	10	10	10	10	10	0	0	0	9
P02786	P04629	0	10	10	10	10	10	10	10	10	10	0	0	0	9
P02751	Q99972	10	10	10	10	10	0	10	10	10	10	0	0	0	9
P02746	Q99972	10	10	10	10	10	0	10	10	10	10	0	0	0	9
P02689	P49773	10	0	10	10	10	10	10	10	0	0	0	10	10	9
P02689	P37802	10	0	10	10	10	10	10	10	0	0	0	10	10	9
P02689	P29401	10	0	10	10	10	10	10	10	0	0	0	10	10	9
P02689	P15121	10	0	10	10	10	10	10	10	0	0	0	10	10	9
P02689	P06733	10	0	10	10	10	10	10	10	0	0	0	10	10	9
P02686	P60201	10	10	10	10	0	10	0	10	10	10	0	10	0	9
P02545	P04629	0	10	10	10	10	10	10	10	10	10	0	0	0	9
P02461	Q99972	10	10	10	10	10	0	10	10	10	10	0	0	0	9
P01584	P23946	10	10	10	10	0	10	0	0	10	10	10	10	0	9
P01116	Q8WU08	0	10	10	10	0	10	10	10	0	10	10	10	0	9
P01106	P04629	0	10	10	10	10	10	10	10	10	10	0	0	0	9
P01033	Q99972	10	10	10	10	10	0	10	10	10	10	0	0	0	9
P01023	Q99972	10	10	10	10	10	0	10	10	10	10	0	0	0	9
P00813	P21728	10	10	10	10	10	10	10	10	0	10	0	0	0	9
P00558	P04629	0	10	10	10	10	10	10	10	10	10	0	0	0	9
P00533	P04629	0	10	10	10	10	10	10	10	10	10	0	0	0	9
P00519	P04629	0	10	10	10	10	10	10	10	10	10	0	0	0	9
P00505	P04629	0	10	10	10	10	10	10	10	10	10	0	0	0	9
P00441	P02689	10	0	10	10	10	10	10	10	0	0	0	10	10	9
P00390	P04629	0	10	10	10	10	10	10	10	10	10	0	0	0	9
P00367	P04629	0	10	10	10	10	10	10	10	10	10	0	0	0	9
P00338	P04629	0	10	10	10	10	10	10	10	10	10	0	0	0	9
O96019	P04629	0	10	10	10	10	10	10	10	10	10	0	0	0	9
O96013	P04629	0	10	10	10	10	10	10	10	10	10	0	0	0	9
O96005	P04629	0	10	10	10	10	10	10	10	10	10	0	0	0	9
O95997	Q9UQM7	10	0	10	0	10	10	10	0	10	10	10	10	0	9
O95983	Q8TDI0	10	0	10	0	10	10	10	10	0	10	10	10	0	9
O95864	P04629	0	10	10	10	10	10	10	10	10	10	0	0	0	9
O95831	P04629	0	10	10	10	10	10	10	10	10	10	0	0	0	9
O95793	P04629	0	10	10	10	10	10	10	10	10	10	0	0	0	9
O95782	P04629	0	10	10	10	10	10	10	10	10	10	0	0	0	9
O95757	P04629	0	10	10	10	10	10	10	10	10	10	0	0	0	9
O95747	P04629	0	10	10	10	10	10	10	10	10	10	0	0	0	9
O95573	P31152	10	10	10	10	0	0	10	10	10	10	0	10	0	9
O95573	P04629	0	10	10	10	10	10	10	10	10	10	0	0	0	9
O95490	P04629	0	10	10	10	10	10	10	10	10	10	0	0	0	9
O95487	P04629	0	10	10	10	10	10	10	10	10	10	0	0	0	9
O95486	P04629	0	10	10	10	10	10	10	10	10	10	0	0	0	9
O95470	Q8IXB3	10	10	10	10	0	10	10	10	0	0	0	10	10	9
O95470	P04629	0	10	10	10	10	10	10	10	10	10	0	0	0	9
O95433	P04629	0	10	10	10	10	10	10	10	10	10	0	0	0	9
O95400	P04629	0	10	10	10	10	10	10	10	10	10	0	0	0	9
O95376	P04629	0	10	10	10	10	10	10	10	10	10	0	0	0	9
O95373	P04629	0	10	10	10	10	10	10	10	10	10	0	0	0	9
O95352	P04629	0	10	10	10	10	10	10	10	10	10	0	0	0	9
O95347	P04629	0	10	10	10	10	10	10	10	10	10	0	0	0	9
O95336	P04629	0	10	10	10	10	10	10	10	10	10	0	0	0	9
O95299	P04629	0	10	10	10	10	10	10	10	10	10	0	0	0	9
O95292	P04629	0	10	10	10	10	10	10	10	10	10	0	0	0	9
O95273	P02689	10	0	10	10	10	10	10	10	0	0	0	10	10	9
O95259	Q14721	0	10	10	10	10	10	10	0	0	10	10	10	0	9
O95248	P04629	0	10	10	10	10	10	10	10	10	10	0	0	0	9
O95239	P04629	0	10	10	10	10	10	10	10	10	10	0	0	0	9
O95232	P04629	0	10	10	10	10	10	10	10	10	10	0	0	0	9
O95219	P54829	10	10	10	10	0	0	10	10	10	10	0	10	0	9
O95202	P04629	0	10	10	10	10	10	10	10	10	10	0	0	0	9
O95163	P04629	0	10	10	10	10	10	10	10	10	10	0	0	0	9
O95155	P04629	0	10	10	10	10	10	10	10	10	10	0	0	0	9
O95140	P04629	0	10	10	10	10	10	10	10	10	10	0	0	0	9
O94979	P04629	0	10	10	10	10	10	10	10	10	10	0	0	0	9
O94973	P04629	0	10	10	10	10	10	10	10	10	10	0	0	0	9
O94966	P04629	0	10	10	10	10	10	10	10	10	10	0	0	0	9
O94955	P04629	0	10	10	10	10	10	10	10	10	10	0	0	0	9
O94933	Q9UGL1	10	0	10	10	10	10	0	0	10	10	10	10	0	9
O94913	P04629	0	10	10	10	10	10	10	10	10	10	0	0	0	9
O94906	P04629	0	10	10	10	10	10	10	10	10	10	0	0	0	9
O94905	P04629	0	10	10	10	10	10	10	10	10	10	0	0	0	9
O94888	P04629	0	10	10	10	10	10	10	10	10	10	0	0	0	9
O94874	P04629	0	10	10	10	10	10	10	10	10	10	0	0	0	9
O94855	P04629	0	10	10	10	10	10	10	10	10	10	0	0	0	9
O94829	P04629	0	10	10	10	10	10	10	10	10	10	0	0	0	9
O94826	P04629	0	10	10	10	10	10	10	10	10	10	0	0	0	9
O94822	Q9ULX7	10	0	10	10	10	10	10	10	0	10	0	10	0	9
O94822	P04629	0	10	10	10	10	10	10	10	10	10	0	0	0	9
O94776	Q8TDI0	10	0	10	0	10	10	10	10	0	10	10	10	0	9
O94776	P04629	0	10	10	10	10	10	10	10	10	10	0	0	0	9
O76094	P04629	0	10	10	10	10	10	10	10	10	10	0	0	0	9
O76070	P31645	0	0	0	10	0	10	10	10	10	10	10	10	10	9
O76031	P04629	0	10	10	10	10	10	10	10	10	10	0	0	0	9
O76021	P04629	0	10	10	10	10	10	10	10	10	10	0	0	0	9
O76003	P04629	0	10	10	10	10	10	10	10	10	10	0	0	0	9
O75976	P04629	0	10	10	10	10	10	10	10	10	10	0	0	0	9
O75962	P04629	0	10	10	10	10	10	10	10	10	10	0	0	0	9
O75916	Q6MZT1	10	10	10	10	10	0	10	0	10	10	0	10	0	9
O75874	P04629	0	10	10	10	10	10	10	10	10	10	0	0	0	9
O75822	P04629	0	10	10	10	10	10	10	10	10	10	0	0	0	9
O75821	P04629	0	10	10	10	10	10	10	10	10	10	0	0	0	9
O75807	Q13522	10	10	10	10	10	10	0	0	10	0	0	10	10	9
O75717	P04629	0	10	10	10	10	10	10	10	10	10	0	0	0	9
O75694	P04629	0	10	10	10	10	10	10	10	10	10	0	0	0	9
O75665	P04629	0	10	10	10	10	10	10	10	10	10	0	0	0	9
O75663	P04629	0	10	10	10	10	10	10	10	10	10	0	0	0	9
O75643	P04629	0	10	10	10	10	10	10	10	10	10	0	0	0	9
O75592	P13385	0	10	0	10	10	0	10	10	10	10	10	0	10	9
O75534	P04629	0	10	10	10	10	10	10	10	10	10	0	0	0	9
O75533	P04629	0	10	10	10	10	10	10	10	10	10	0	0	0	9
O75489	P04629	0	10	10	10	10	10	10	10	10	10	0	0	0	9
O75477	P04629	0	10	10	10	10	10	10	10	10	10	0	0	0	9
O75473	P04629	0	10	10	10	10	10	10	10	10	10	0	0	0	9
O75436	P04629	0	10	10	10	10	10	10	10	10	10	0	0	0	9
O75400	P04629	0	10	10	10	10	10	10	10	10	10	0	0	0	9
O75390	P04629	0	10	10	10	10	10	10	10	10	10	0	0	0	9
O75323	P04629	0	10	10	10	10	10	10	10	10	10	0	0	0	9
O75312	P04629	0	10	10	10	10	10	10	10	10	10	0	0	0	9
O75306	P04629	0	10	10	10	10	10	10	10	10	10	0	0	0	9
O75190	P04629	0	10	10	10	10	10	10	10	10	10	0	0	0	9
O75179	P04629	0	10	10	10	10	10	10	10	10	10	0	0	0	9
O75175	P04629	0	10	10	10	10	10	10	10	10	10	0	0	0	9
O75170	P04629	0	10	10	10	10	10	10	10	10	10	0	0	0	9
O75165	P04629	0	10	10	10	10	10	10	10	10	10	0	0	0	9
O75153	P04629	0	10	10	10	10	10	10	10	10	10	0	0	0	9
O75152	P04629	0	10	10	10	10	10	10	10	10	10	0	0	0	9
O75150	P04629	0	10	10	10	10	10	10	10	10	10	0	0	0	9
O75146	P04629	0	10	10	10	10	10	10	10	10	10	0	0	0	9
O75131	P04629	0	10	10	10	10	10	10	10	10	10	0	0	0	9
O75116	P04629	0	10	10	10	10	10	10	10	10	10	0	0	0	9
O75054	P04629	0	10	10	10	10	10	10	10	10	10	0	0	0	9
O75027	P04629	0	10	10	10	10	10	10	10	10	10	0	0	0	9
[truncated: 22,813 more rows]

## Sheet: Prominent proteins within loses
Supplementary Table VIId: Proteins frequently involved in edgetic loss perturbations across the majority of cancer types
Cancer types	Prominent proteins involved in >10
	edgetic Loss Perturbations across cancer types
LUAD, HNSC, BRCA, KICH, KIRC, KIRP, HNSC, LIHC, COAD	NTRK1 (1924)
BLCA, STES, THCA, LUSC, KIRP, KIRC, KICH, LUAD, COAD	CAMK2A (35)
LUAD, BRCA, BLCA, LUSC, KICH, KIRP, LIHC, COAD, HNSC	MYOC (28)
BRCA,HNSC,KICH, KIRP, LIHC, LUAD, LUSC, PRAD, THCA	TDGF1 (16)
BLCA, BRCA, LUSC, KIRP, KICH, KIRC, COAD, LUAD, LIHC	APP (14)
BLCA, STES, LUSC, KIRP, KICH, KIRC, COAD, HNSC, LIHC	CA14 (13)
BLCA, BRCA, LUSC, KIRP, KIRC, HNSC, COAD, LUAD, STES	AVPR2(10)
The numbers in the brcackets indiate the number of edges perturbed at that protein.
Other Proteins having multiple edgetic perturbations
	Protein	Number of perturbed edges
	ITLN1	9
	PTPN5	9
	CHD5	8
	KLHL14	7
	CRHBP	6
	LNX1	6
	FMN2	6
	PPP1R1A	5
	PMP2	4
	MAPK4	4
	CNTN1	4
	LRP1B	4
	IL6	3
	SLCA4	3
	SOX10	3
	PLP1	3
	KCNA1	3
	ELMOD1	3
	HPCAL4	3
	ZNF536	2
	TAC1	2
	MEOX2	2
	NRXN1	2
	TRARGI	2
	NLGN1	2
	PCDH20	2
	SCN3A	2
	CYP46A1	2
