# Supplementary material for: Edgetic perturbation signatures represent known and novel cancer biomarkers
Source: Sci Rep. 2020 Mar 9;10:4350. doi: 10.1038/s41598-020-61422-3 (PMC7062722; doi:10.1038/s41598-020-61422-3)
Supplement: Supplementary file 9 — Table S8. [file 41598_2020_61422_MOESM9_ESM.xlsx]

## Sheet: Supplementary Table VIII
Supplementary Table VIIIa: Distribution of patient samples harbouring the top gained edges across cancer stages.
Cancer type	Sample size(a)	Number of samples grouped in Stage I	Number of samples grouped in Stage II	Number of samples grouped in Stage III	Number of samples grouped in Stage IV
THCA	59	25	6	9	3
BLCA	19	0	4	7	8
BRCA	110	18	60	21	2
KIRC	72	25	11	16	20
KICH	25	10	8	3	4
LUAD	58	26	9	12	2
LUSC	51	24	15	5	1
LIHC	40	15	7	8	0
COAD	26	3	13	4	5
KIRP	32	14	1	12	4
STES	43	5	16	7	3
HNSC	43	2	16	7	19
	(a)number of patient samples having significantly perturbed edges.
Supplementary Table VIIIb: Distribution of patient samples harbouring the top lost edges across cancer stages.
Cancer type	Sample size(a)	Number of samples grouped in Stage I	Number of samples grouped in Stage II	Number of samples grouped in stage III	Number of samples
					grouped in
					Stage IV
THCA	59	25	6	9	3
BLCA	19	0	4	7	8
BRCA	110	18	60	21	2
KIRC	72	25	11	16	20
KICH	25	10	8	3	4
LUAD	49	26	9	12	2
LUSC	46	24	15	5	1
LIHC	38	14	9	9	1
COAD	26	3	13	4	5
KIRP	32	14	1	12	4
STES	43	5	16	7	3
HNSC	43	2	16	7	19
	(a)number of samples having the significantly perturbed edges
