# Supplementary material for: Edgetic perturbation signatures represent known and novel cancer biomarkers
Source: Sci Rep. 2020 Mar 9;10:4350. doi: 10.1038/s41598-020-61422-3 (PMC7062722; doi:10.1038/s41598-020-61422-3)
Supplement: Supplementary file 10 — Table S9. [file 41598_2020_61422_MOESM10_ESM.xlsx]

## Sheet: Supplementary Table IX
Supplementary Table IX: Clinical and phenotypic traits of 639 patients diagnosed with 13 cancer types as obtained from TCGA.
Cancer type a)	Sample size b)	Number of subtypes	Number of SMGs	Number of patients in Stage I	Number of patients in Stage II	Number of patients in Stage III	Number of patients in Stage IV	Dead/Alive c)
BLCA	19	NA	54	0	4	7	8	2019-12-07
BRCA	112	3	52	18	60	21	2	24/74
COAD	26	2	87	3	13	4	5	2019-07-01
HNSC	43	4	52	2	16	7	19	31 /11
KICH	25	2	18	10	8	3	4	2021-04-01
KIRC	72	4	26	25	11	16	20	25 /47
KIRP	32	2	21	14	1	12	4	2026-06-01
LIHC	50	NA	49	18	11	12	1	30 /20
LUAD	58	3	58	28	13	13	2	22 /35
LUSC	51	4	35	27	17	6	1	24 /27
THCA	59	2	36	35	7	11	4	1953-04-01
PRAD	52	6	40	NA	NA	NA	NA	0 /51
STES	43	2	27	9	21	9	3	1938-05-01
a) BLCA-bladder urothelial carcinoma, BRCA-breast invasive carcinoma, COAD-colon adenocarcinoma, HNSC-head and neck squamous cell carcinoma, KICH-kidney chromophobe, KIRC-kidney renal clear cell carcinoma, KIRP-kidney renal papillary cell carcinoma, LIHC-liver hepatocellular carcinoma, LUAD-lung adenocarcinoma, LUSC-lung squamous cell carcinoma, THCA-thyroid carcinoma, PRAD-prostate adenocarcinom…
